# Supplementary material for: AhABI4s Negatively Regulate Salt-Stress Response in Peanut
Source: PubMed Central journal article supplement (PMC8551806; doi:10.3389/fpls.2021.741641), 2021-10-14
Supplement: Data_Sheet_2.pdf [file Data_Sheet_2.pdf]

Supplementary Figure 2

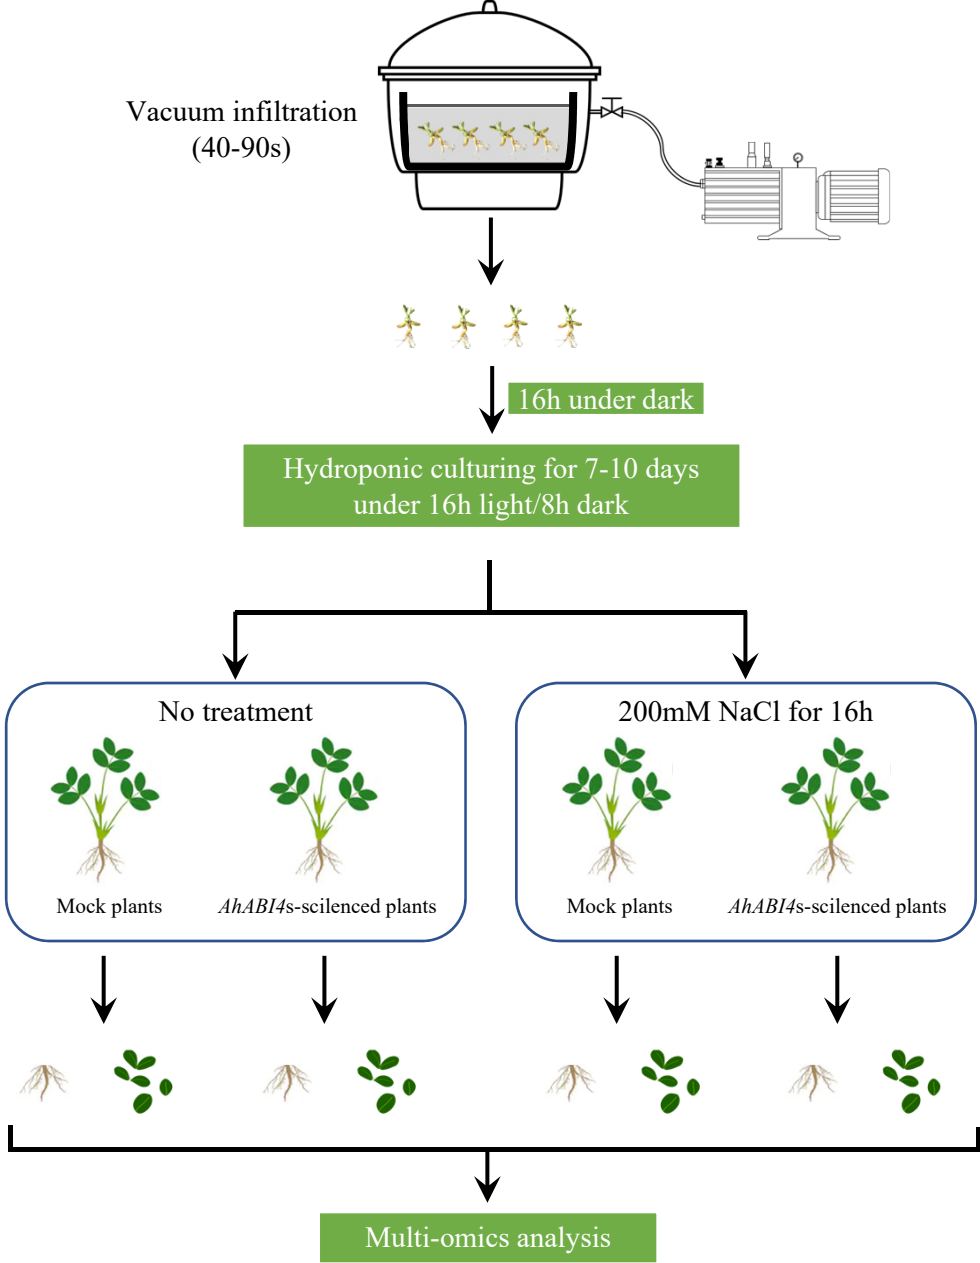

Supplementary Figure 2 Vacuum infiltration VIGS and sample harvest for multi-omics analysis.
