# Supplementary material for: AhABI4s Negatively Regulate Salt-Stress Response in Peanut
Source: PubMed Central journal article supplement (PMC8551806; doi:10.3389/fpls.2021.741641), 2021-10-14
Supplement: Data_Sheet_3.pdf [file Data_Sheet_3.pdf]

### Supplementary Figure 3

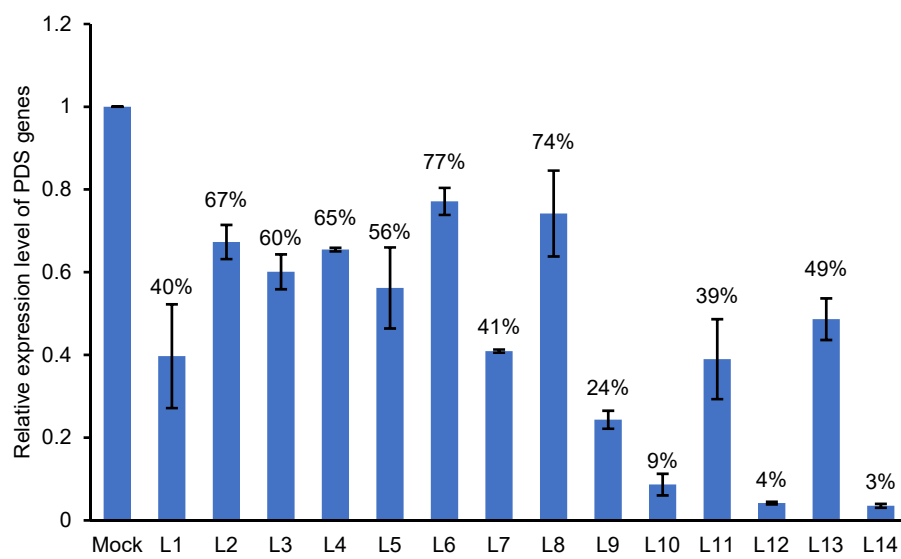

**Supplementary Figure 3** Relative mRNA levels of PDS genes in *AhPDS*-silenced lines (L1 to L14) compared with that of Mock plants.
