# Supplementary material for: AhABI4s Negatively Regulate Salt-Stress Response in Peanut
Source: PubMed Central journal article supplement (PMC8551806; doi:10.3389/fpls.2021.741641), 2021-10-14
Supplement: Data_Sheet_4.pdf [file Data_Sheet_4.pdf]

# Supplementary Figure 4

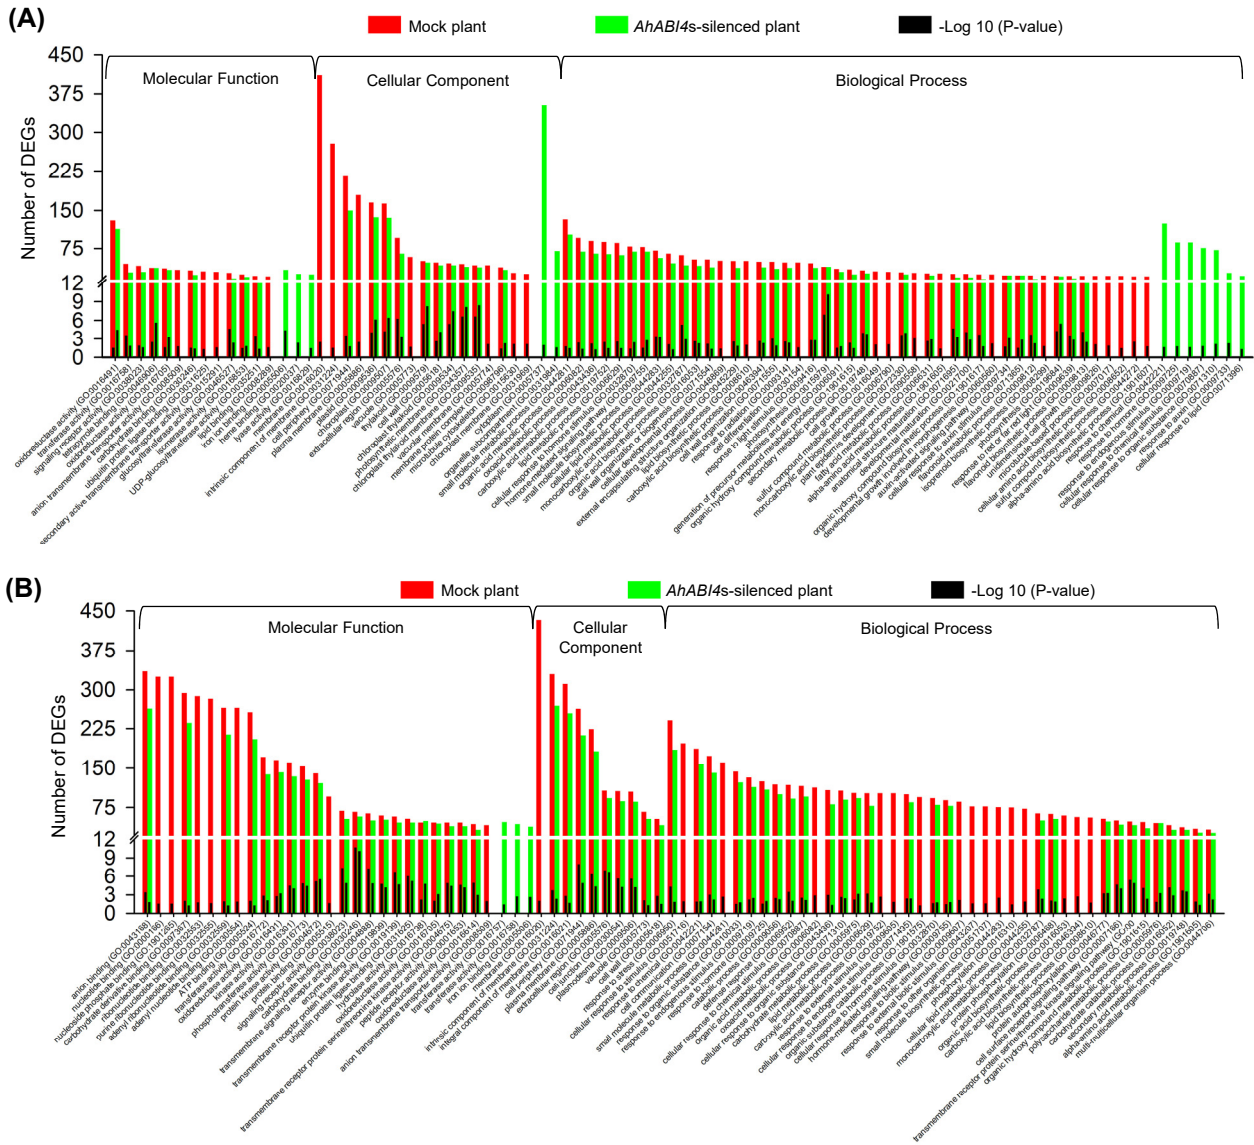

Supplementary Figure 4 GO enrichment of DEGs with S-box in their promoter region. Terms with more than 30 genes in leaf (A) and root (B) are shown.
