# Supplementary material for: AhABI4s Negatively Regulate Salt-Stress Response in Peanut
Source: PubMed Central journal article supplement (PMC8551806; doi:10.3389/fpls.2021.741641), 2021-10-14
Supplement: Data_Sheet_5.pdf [file Data_Sheet_5.pdf]

# Supplementary Figure 5

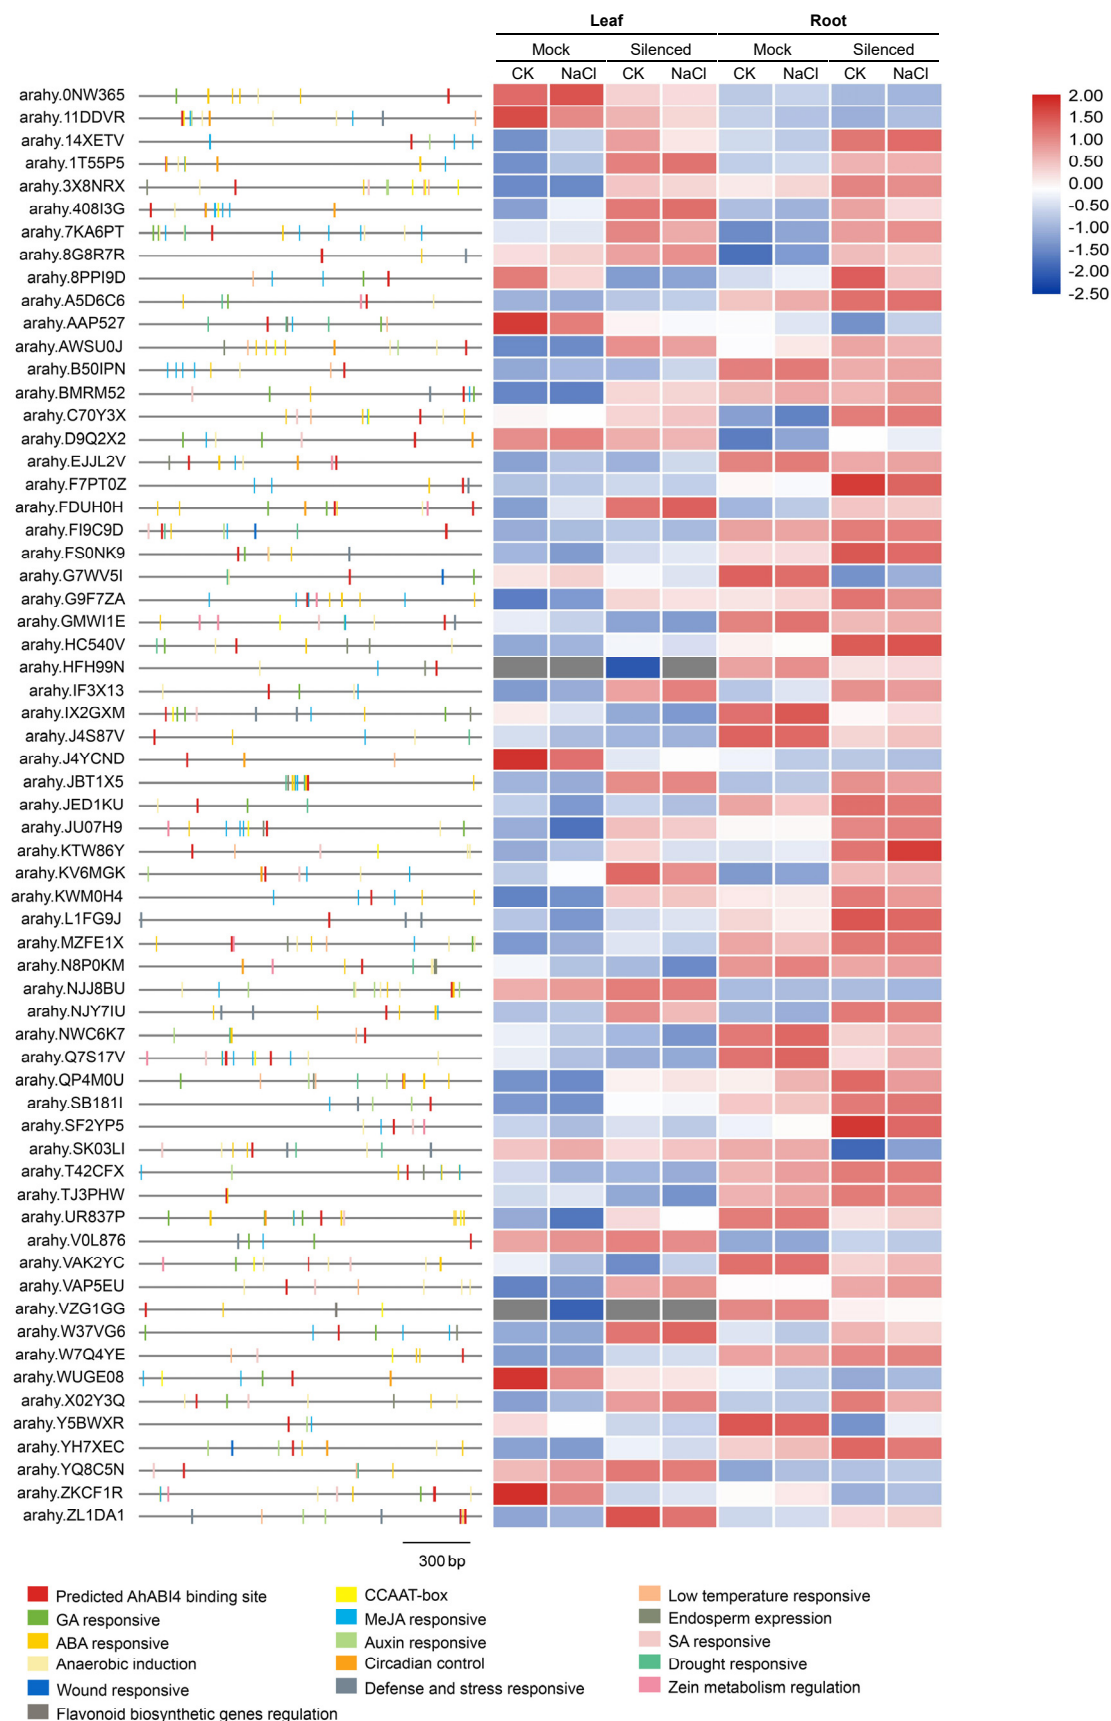

**Supplementary Figure 5** The 63 potential down stream targets of AhABI4s under salt stress. The *cis*-elements in promoter (Left) and expression heat map (Right) of potential AhABI4 targets share similar expression in transcription and translation level are showing. The log<sub>10</sub> value of FPKM were normalized by row for better visualization.
