# Supplementary material for: AhABI4s Negatively Regulate Salt-Stress Response in Peanut
Source: PubMed Central journal article supplement (PMC8551806; doi:10.3389/fpls.2021.741641), 2021-10-14
Supplement: Data_Sheet_6.pdf [file Data_Sheet_6.pdf]

## Supplementary Figure 6

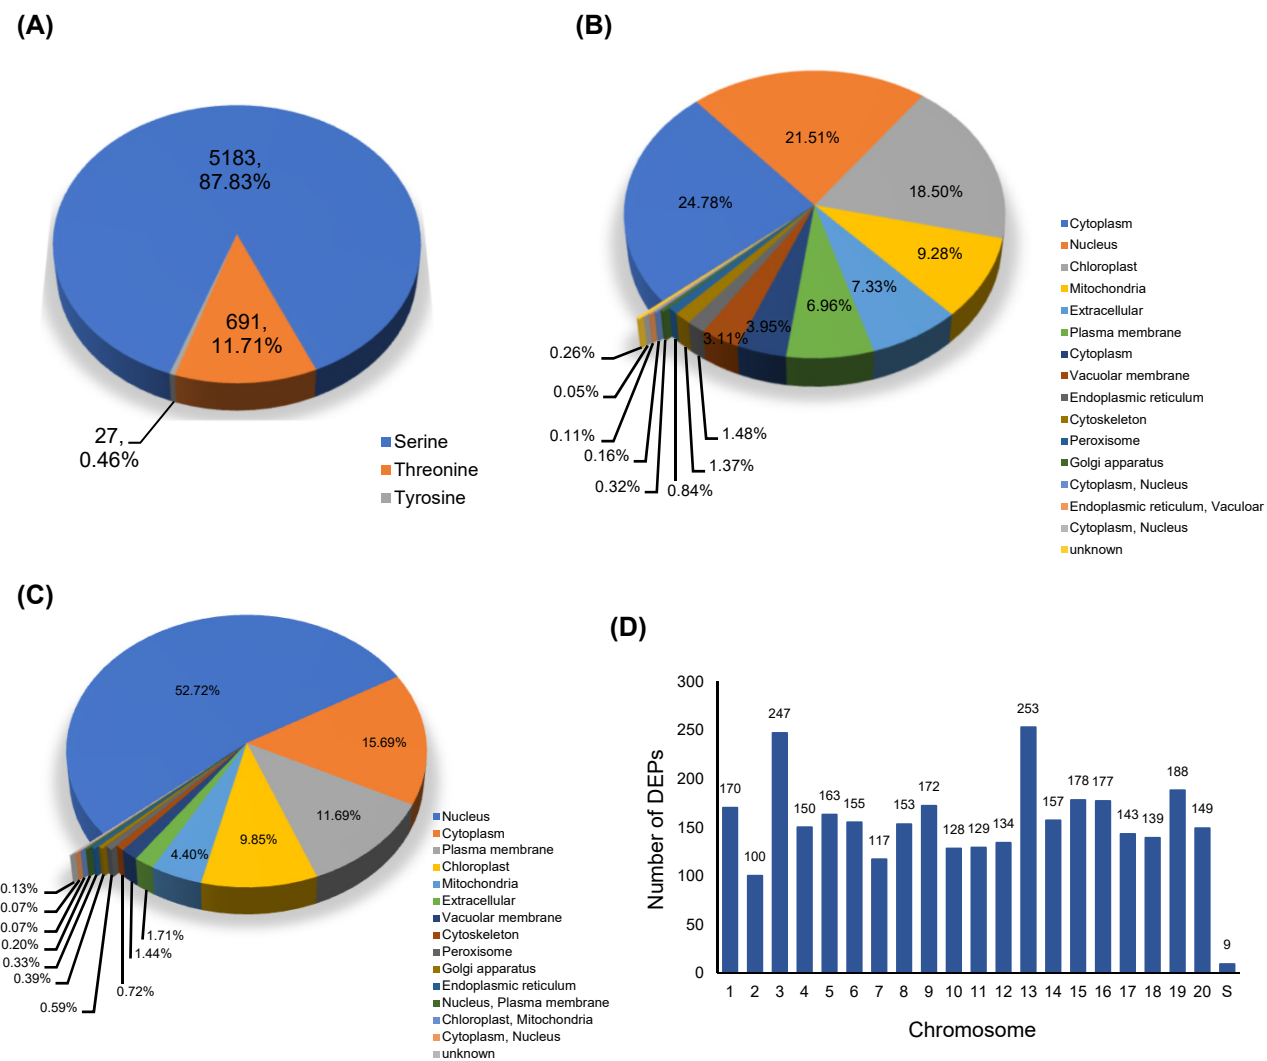

**Supplementary Figure 6** Characteristics of proteome and phosphoproteome. **(A)** Distribution of serine, threonine and tyrosine with different modification levels. **(B)** Predicated subcellular of DEPs identified in proteome. **(C)** Predicated subcellular of DEPs identified in phosphoproteome. Proteins with unknown subcellular localization refer to those which were identified in root but predicted to localize in chloroplast. **(D)** Distribution of different expression/phosphorylation proteins among chromosomes. S, stand for scaffold.
