# Supplementary material for: AhABI4s Negatively Regulate Salt-Stress Response in Peanut
Source: PubMed Central journal article supplement (PMC8551806; doi:10.3389/fpls.2021.741641), 2021-10-14
Supplement: Data_Sheet_7.pdf [file Data_Sheet_7.pdf]

## Supplementary Figure 7

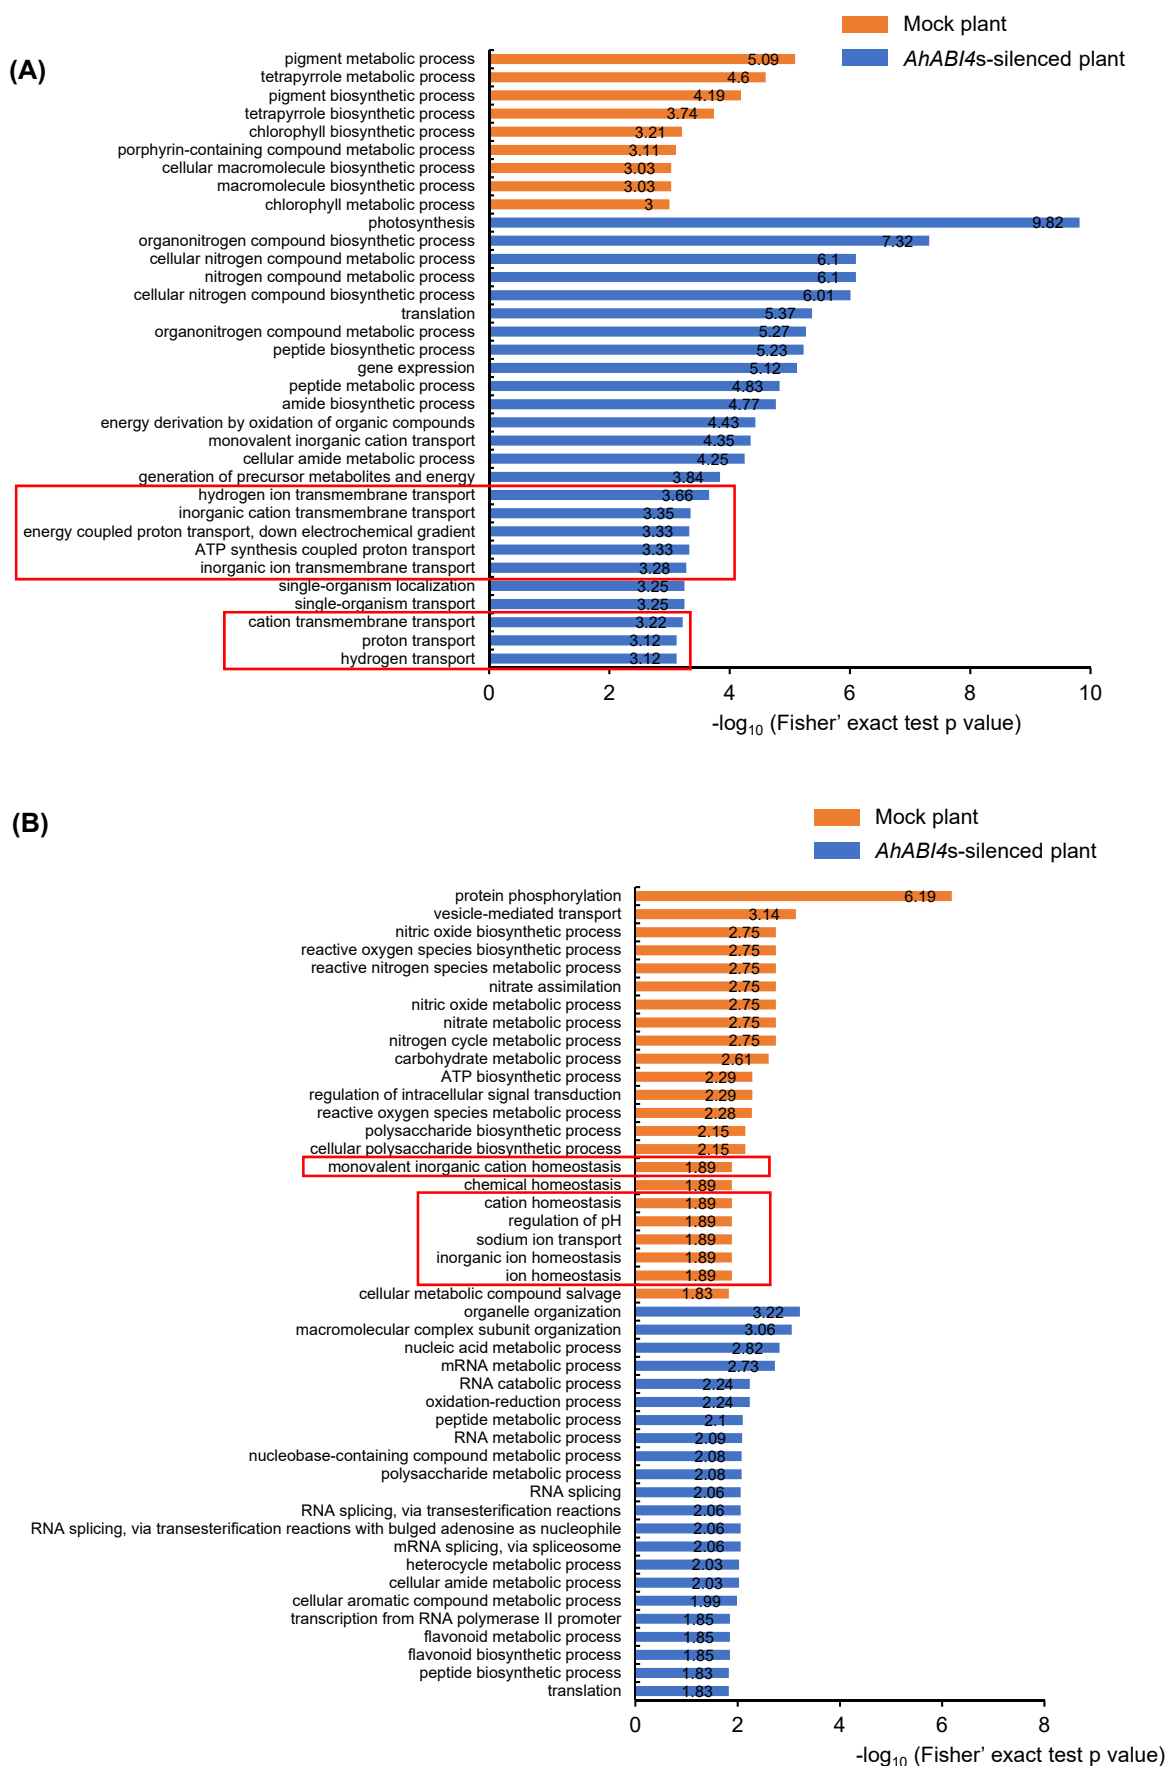

**Supplementary Figure 7** GO enrichment of DEPs in proteome and phosphoproteome ( $P < 0.05$ ). **(A)** GO enrichment of biological progress of differential expression proteins in proteome (partial). **(B)** GO enrichment of biological progress of differential expression proteins in phosphoproteome (partial).
