# Supplementary material for: AhABI4s Negatively Regulate Salt-Stress Response in Peanut
Source: PubMed Central journal article supplement (PMC8551806; doi:10.3389/fpls.2021.741641), 2021-10-14
Supplement: Data_Sheet_8.pdf [file Data_Sheet_8.pdf]

# Supplementary Figure 8

(A)

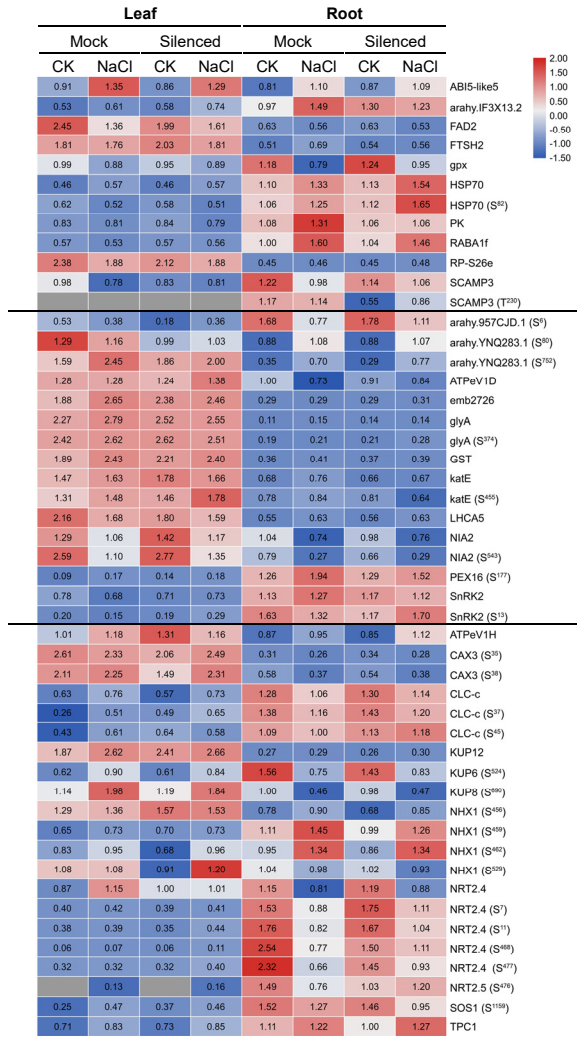

(B)

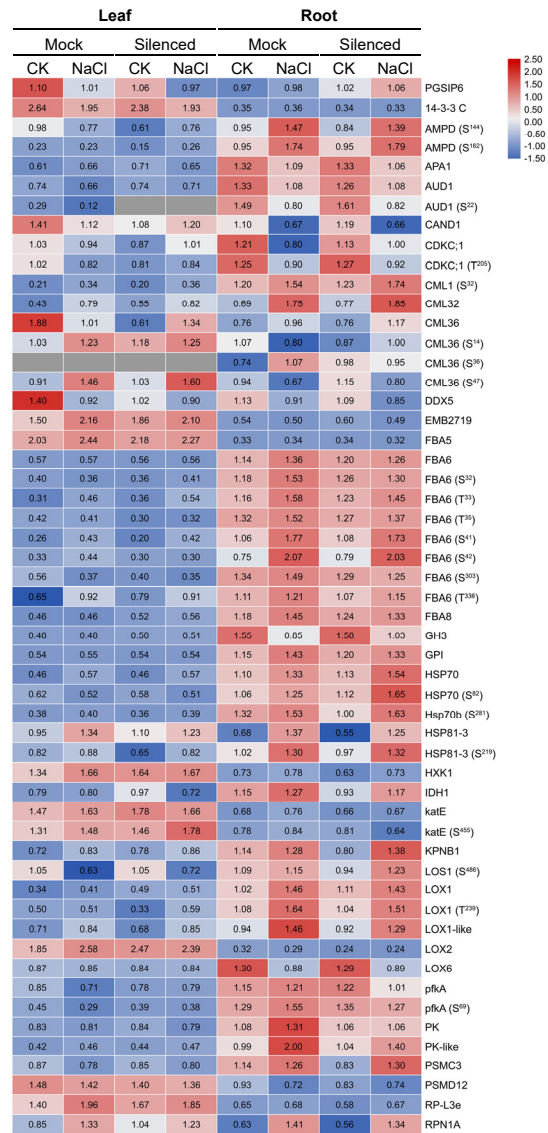

**Supplementary Figure 8** Visualization of expression levels of ion transporters/channels, predicted Na<sup>+</sup> sensor, and their interaction proteins.

(A) Expression level of down-stream targets (upper), interacted proteins (middle) and the ion transporters/channels in proteome and phosphoproteome. (B) Expression level of predicted Na<sup>+</sup> sensor PGSIP6 and interacted proteins in proteome and phosphoproteome. Average estimated expression levels (log<sub>2</sub> transformed) were normalized per row by normal distribution and colored according to the indicated color gradient. The original data were shown in each tile. The legend text showed the power only.
