# Supplementary material for: AhABI4s Negatively Regulate Salt-Stress Response in Peanut
Source: PubMed Central journal article supplement (PMC8551806; doi:10.3389/fpls.2021.741641), 2021-10-14
Supplement: Data_Sheet_9.pdf [file Data_Sheet_9.pdf]

## Supplementary Figure 9

|        |                                                                                                                                |     |
|--------|--------------------------------------------------------------------------------------------------------------------------------|-----|
| PGS1P6 | MMKTHRASWSCLVITLMEVYDLSAIVRTDEAYIT...LYGDEFLLGVRVLGKSLRNTGSKDMVVLVSDGVSDYARNLIRADGWIVETLSLANPVRPFRFVGVTYTKLIFNMIYKRVVY         | 122 |
| MOCA1  | MVR...LKTSLWVLLALVSLQNGSFGSESSKWAYVITLYGDEFLLGVRVLGKSLRNTGSKDMVVLVSDGVSDYARNLIRADGWIVETLSLANPVRPFRFVGVTYTKLIFNMIYKRVVY         | 122 |
| PGS1P6 | LDADTIIVKNIIDDLFKCCKFCANLKHSERLNSGVMVVEPSETLFDNDMMRKYKTLASVTGGDQGFNSYSDFPNARVDFEFLNSPEALKSRPTFCMERLSTLYNADVGLYMLANKWVVDENEIRVI | 247 |
| MOCA1  | LDADTIIVKNIIDDLFKCSKFCANLKHSERLNSGVMVVEPSEALFDNDMMRKYKTLASVTGGDQGFNSYSDFPNARVDFEFLNSPEALKSRPTFCMERLSTLYNADVGLYMLANKWVVDENEIRVI | 247 |
| PGS1P6 | HYTLGPLKPDWWTSMILKPVDTQDIRVQLAESLPGTGGGQPKESFLVKFLFLPLCALLIGVHSEL...KNQGSFQRSSLCDHFRHRYKIRSTTPIITISISDSTLSSSHILLNLSQ           | 367 |
| MOCA1  | HYTLGPLKPDWWTSMILKPVDAHSHIRVRLPETLPGTGGGSYQHDELVKKFLFLPLCALLIGVHSEL...RSTQGRGSLQWSSFSNQIRVLYYKVRNSNGLGTVGVS...TMSPSYDPHSINQA   | 365 |
| PGS1P6 | FKVIVYLGSLTGVCFMAAVSLGIALALIPRCVMPWTGLLVYEWTFITFFLLFCGVYHLIYQWKIVASKAVSLSQPGSSDYDSKRRHQASCDATITVYGLGMAFLATAAPSLPVEGTI          | 492 |
| MOCA1  | SKVFOHLAGVSVVVCFTAVLLSLGTSFAIVPRGIMPWTGLLVYEWTFITFFLLFCGVYHLIYQWKIVASKAVSLSQPGSSDYDSKRRHQASCDATITVYGLGMAFLATAAPSLPVEGTI        | 484 |
| PGS1P6 | TALFVRLGLMVGGITLASFMTYASEHLAIVRFLKGLBEWDLARNRITFCFLC.....                                                                      | 544 |
| MOCA1  | TALFVRLGLMVGGLTTLASFMTYASEHLAIVRFLKGLBDRRDTTISNSLFCFLC.....                                                                    | 537 |

**Supplementary Figure 9** Alignment of *Arabidopsis* Na<sup>+</sup> sensor MOCA1 and its homologous gene in peanut. Transmembrane domains were marked by red lines, and the Na<sup>+</sup> binding region was indicated using \*.
