# Supplementary material for: AhABI4s Negatively Regulate Salt-Stress Response in Peanut
Source: Front Plant Sci. 2021 Oct 14;12:741641. doi: 10.3389/fpls.2021.741641 (PMC8551806; doi:10.3389/fpls.2021.741641)
Supplement: Supplementary file 9 [file Table_9.XLSX]

## Sheet: Sites_quant all
Supplementary Table 9 Phosphorylated sites and proteins identified in phosphoproteomics
identified-sites-all (8273)					identified-sites (localization probability > 0.75, 6187)					quantifiable-sites ( localization probability > 0.75, 5901)					quantifiable-proteins ( localization probability > 0.75, 2985)
Protein accession	Position	Amino acid	Protein description		Protein accession	Position	Amino acid	Protein description		Protein accession	Position	Amino acid	Protein description		Protein accession	Protein description
arahy.Tifrunner.gnm1.ann1.UE8RN5.1	58	S	protein phosphatase inhibitor 2-like [Arachis ipaensis]		arahy.Tifrunner.gnm1.ann1.T2XUYC.1	142	T	GLABRA2 expression modulator-like isoform X2 [Arachis duranensis]		arahy.Tifrunner.gnm1.ann1.009U61	425	S	calmodulin-binding heat-shock protein [Medicago truncatula]		arahy.Tifrunner.gnm1.ann1.009U61	calmodulin-binding heat-shock protein [Medicago truncatula]
arahy.Tifrunner.gnm1.ann1.K2PXHZ.1	349	S	serine/arginine-rich splicing factor SR45 [Arachis ipaensis]		arahy.Tifrunner.gnm1.ann1.DJG6PN.1	224	S	tail fiber [Arabidopsis thaliana]		arahy.Tifrunner.gnm1.ann1.00HJQK.1	387	S	protein trichome birefringence-like 35 isoform X2 [Arachis duranensis]		arahy.Tifrunner.gnm1.ann1.00HJQK.1	protein trichome birefringence-like 35 isoform X2 [Arachis duranensis]
arahy.Tifrunner.gnm1.ann1.64XDM2.1	99	S	nuclear pore complex protein NUP35 isoform X2 [Arachis duranensis]		arahy.Tifrunner.gnm1.ann1.UE8RN5.1	58	S	protein phosphatase inhibitor 2-like [Arachis ipaensis]		arahy.Tifrunner.gnm1.ann1.00VL53.1	321	S	probable inactive receptor kinase At2g26730 [Arachis ipaensis]		arahy.Tifrunner.gnm1.ann1.00VL53.1	probable inactive receptor kinase At2g26730 [Arachis ipaensis]
arahy.Tifrunner.gnm1.ann1.JA3EPN.1	391	S	WD repeat-containing protein 48 isoform X2 [Arachis duranensis]		arahy.Tifrunner.gnm1.ann1.K2PXHZ.1	349	S	serine/arginine-rich splicing factor SR45 [Arachis ipaensis]		arahy.Tifrunner.gnm1.ann1.00VL53.1	348	S	probable inactive receptor kinase At2g26730 [Arachis ipaensis]		arahy.Tifrunner.gnm1.ann1.00WUVK.1	plant UBX domain-containing protein 8 isoform X2 [Arachis ipaensis]
arahy.Tifrunner.gnm1.ann1.ZH4NLG.1	299	S	probable serine/threonine protein kinase IREH1 isoform X1 [Arachis duranensis]		arahy.Tifrunner.gnm1.ann1.64XDM2.1	99	S	nuclear pore complex protein NUP35 isoform X2 [Arachis duranensis]		arahy.Tifrunner.gnm1.ann1.00VL53.1	644	S	probable inactive receptor kinase At2g26730 [Arachis ipaensis]		arahy.Tifrunner.gnm1.ann1.014EBR.1	homeobox protein HAT3.1-like isoform X3 [Arachis ipaensis]
arahy.Tifrunner.gnm1.ann1.NX6A0A.1	178	T	syntaxin-121-like [Arachis ipaensis]		arahy.Tifrunner.gnm1.ann1.JA3EPN.1	391	S	WD repeat-containing protein 48 isoform X2 [Arachis duranensis]		arahy.Tifrunner.gnm1.ann1.00WUVK.1	429	S	plant UBX domain-containing protein 8 isoform X2 [Arachis ipaensis]		arahy.Tifrunner.gnm1.ann1.018Q39.2	protein STRUBBELIG-RECEPTOR FAMILY 3-like [Arachis ipaensis]
arahy.Tifrunner.gnm1.ann1.ZK9U10.1	72	T	"glucan endo-1,3-beta-glucosidase 14 [Arachis duranensis]"		arahy.Tifrunner.gnm1.ann1.NX6A0A.1	178	T	syntaxin-121-like [Arachis ipaensis]		arahy.Tifrunner.gnm1.ann1.014EBR.1	307	S	homeobox protein HAT3.1-like isoform X3 [Arachis ipaensis]		arahy.Tifrunner.gnm1.ann1.01A8M3	protein ALWAYS EARLY 2 isoform X1 [Arachis ipaensis]
arahy.Tifrunner.gnm1.ann1.T6TPBC.2	499	S	zinc ion-binding protein [Medicago truncatula]		arahy.Tifrunner.gnm1.ann1.JAFV55.1	123	S	uncharacterized membrane protein At1g16860 [Arachis duranensis]		arahy.Tifrunner.gnm1.ann1.014EBR.1	1014	S	homeobox protein HAT3.1-like isoform X3 [Arachis ipaensis]		arahy.Tifrunner.gnm1.ann1.01D1MQ.2	ABC transporter G family member 15-like [Arachis ipaensis]
arahy.Tifrunner.gnm1.ann1.Y7HUGW.1	239	S	"oxygen-evolving enhancer protein 1, chloroplastic [Arachis duranensis]"		arahy.Tifrunner.gnm1.ann1.ZK9U10.1	72	T	"glucan endo-1,3-beta-glucosidase 14 [Arachis duranensis]"		arahy.Tifrunner.gnm1.ann1.018Q39.2	375	S	protein STRUBBELIG-RECEPTOR FAMILY 3-like [Arachis ipaensis]		arahy.Tifrunner.gnm1.ann1.01DGNM.1
arahy.Tifrunner.gnm1.ann1.NIUA4E.3	505	Y	vacuolar fusion protein CCZ1 homolog isoform X2 [Arachis ipaensis]		arahy.Tifrunner.gnm1.ann1.T6TPBC.2	499	S	zinc ion-binding protein [Medicago truncatula]		arahy.Tifrunner.gnm1.ann1.018Q39.2	479	S	protein STRUBBELIG-RECEPTOR FAMILY 3-like [Arachis ipaensis]		arahy.Tifrunner.gnm1.ann1.01WB0T.1	patellin-3 [Arachis duranensis]
arahy.Tifrunner.gnm1.ann1.D5HFJ9.3	151	S	myeloid leukemia factor 1-like [Arachis ipaensis]		arahy.Tifrunner.gnm1.ann1.Y7HUGW.1	239	S	"oxygen-evolving enhancer protein 1, chloroplastic [Arachis duranensis]"		arahy.Tifrunner.gnm1.ann1.018Q39.2	483	S	protein STRUBBELIG-RECEPTOR FAMILY 3-like [Arachis ipaensis]		arahy.Tifrunner.gnm1.ann1.023UF6.1	probable ADP-ribosylation factor GTPase-activating protein AGD6 [Arachis duranensis]
arahy.Tifrunner.gnm1.ann1.2UVC2V.1	252	S	SAC3 family protein B isoform X1 [Arachis ipaensis]		arahy.Tifrunner.gnm1.ann1.NIUA4E.3	505	Y	vacuolar fusion protein CCZ1 homolog isoform X2 [Arachis ipaensis]		arahy.Tifrunner.gnm1.ann1.018Q39.2	487	S	protein STRUBBELIG-RECEPTOR FAMILY 3-like [Arachis ipaensis]		arahy.Tifrunner.gnm1.ann1.03CHB1	IRK-interacting protein [Arachis ipaensis]
arahy.Tifrunner.gnm1.ann1.ZWJH5S.2	778	S	"dentin sialophosphoprotein-like protein, putative [Medicago truncatula]"		arahy.Tifrunner.gnm1.ann1.IMA97E.2	185	S	lys-63-specific deubiquitinase BRCC36-like [Arachis ipaensis]		arahy.Tifrunner.gnm1.ann1.01A8M3	235	S	protein ALWAYS EARLY 2 isoform X1 [Arachis ipaensis]		arahy.Tifrunner.gnm1.ann1.03DKLN.1	MLP-like protein 423 [Arachis ipaensis]
arahy.Tifrunner.gnm1.ann1.SAS3Z5.2	448	S	zinc finger CCCH domain-containing protein 55 [Arachis ipaensis]		arahy.Tifrunner.gnm1.ann1.2UVC2V.1	252	S	SAC3 family protein B isoform X1 [Arachis ipaensis]		arahy.Tifrunner.gnm1.ann1.01D1MQ.2	647	S	ABC transporter G family member 15-like [Arachis ipaensis]		arahy.Tifrunner.gnm1.ann1.03F3RZ.2	protein PHR1-LIKE 1-like isoform X1 [Arachis duranensis]
arahy.Tifrunner.gnm1.ann1.QU4SLQ.3	248	S	small glutamine-rich tetratricopeptide repeat-containing protein alpha isoform X2 [Arachis duranensis]		arahy.Tifrunner.gnm1.ann1.4BR56W.1	144	S	AMP deaminase-like [Arachis ipaensis]		arahy.Tifrunner.gnm1.ann1.01D1MQ.2	650	S	ABC transporter G family member 15-like [Arachis ipaensis]		arahy.Tifrunner.gnm1.ann1.03HQ02	ATP-dependent helicase BRM isoform X1 [Arachis ipaensis]
arahy.Tifrunner.gnm1.ann1.JIL7XJ.1	1613	T	sister chromatid cohesion protein PDS5 homolog B-like [Arachis duranensis]		arahy.Tifrunner.gnm1.ann1.72FWH3.1	122	S	"protein indeterminate-domain 4, chloroplastic-like [Arachis ipaensis]"		arahy.Tifrunner.gnm1.ann1.01DGNM.1	283	S			arahy.Tifrunner.gnm1.ann1.04I11T.1	E3 ubiquitin-protein ligase RHF1A-like [Arachis ipaensis]
arahy.Tifrunner.gnm1.ann1.J916II.1	61	S	protein SAD1/UNC-84 domain protein 1-like [Arachis duranensis]		arahy.Tifrunner.gnm1.ann1.B7TU6S.2	37	T	ubiquitin carboxyl-terminal hydrolase 14 [Arachis ipaensis]		arahy.Tifrunner.gnm1.ann1.01WB0T.1	111	S	patellin-3 [Arachis duranensis]		arahy.Tifrunner.gnm1.ann1.04JW1L.2	mitogen-activated protein kinase kinase kinase YODA-like isoform X3 [Arachis duranensis]
arahy.Tifrunner.gnm1.ann1.C14L30.1	187	S	cellulose synthase A catalytic subunit 1 [UDP-forming]-like [Arachis ipaensis]		arahy.Tifrunner.gnm1.ann1.FSDW2L.1	856	S	MAP3K epsilon protein kinase 1-like [Arachis duranensis]		arahy.Tifrunner.gnm1.ann1.023UF6.1	171	S	probable ADP-ribosylation factor GTPase-activating protein AGD6 [Arachis duranensis]		arahy.Tifrunner.gnm1.ann1.05VQV1.1	"arogenate dehydrogenase 1, chloroplastic-like [Arachis ipaensis]"
arahy.Tifrunner.gnm1.ann1.L7TZBM.1	422	S	RNA-binding (RRM/RBD/RNP motif) family protein [Medicago truncatula]		arahy.Tifrunner.gnm1.ann1.43249I.1	50	T	RNA polymerase-associated protein LEO1-like [Arachis ipaensis]		arahy.Tifrunner.gnm1.ann1.023UF6.1	243	S	probable ADP-ribosylation factor GTPase-activating protein AGD6 [Arachis duranensis]		arahy.Tifrunner.gnm1.ann1.06L841	TBC1 domain family member 5 homolog A-like [Arachis ipaensis]
arahy.Tifrunner.gnm1.ann1.U15FS5.1	145	S	Uncharacterized conserved protein UCP031279 [Arabidopsis thaliana]		arahy.Tifrunner.gnm1.ann1.SAS3Z5.2	448	S	zinc finger CCCH domain-containing protein 55 [Arachis ipaensis]		arahy.Tifrunner.gnm1.ann1.023UF6.1	247	S	probable ADP-ribosylation factor GTPase-activating protein AGD6 [Arachis duranensis]		arahy.Tifrunner.gnm1.ann1.06VYCT.5	ankyrin repeat plant-like protein [Medicago truncatula]
arahy.Tifrunner.gnm1.ann1.T0GB9L.1	385	S	auxilin-related protein 2-like [Arachis duranensis]		arahy.Tifrunner.gnm1.ann1.QU4SLQ.3	248	S	small glutamine-rich tetratricopeptide repeat-containing protein alpha isoform X2 [Arachis duranensis]		arahy.Tifrunner.gnm1.ann1.023UF6.1	411	S	probable ADP-ribosylation factor GTPase-activating protein AGD6 [Arachis duranensis]		arahy.Tifrunner.gnm1.ann1.06XI81	"pentatricopeptide repeat-containing protein At1g26460, mitochondrial [Arachis duranensis]"
arahy.Tifrunner.gnm1.ann1.PW4F55.1	573	S	probable serine/threonine-protein kinase WNK5 [Arachis ipaensis]		arahy.Tifrunner.gnm1.ann1.P0I1SB.1	955	S	"amino-terminal region of chorein, A TM vesicle-mediated sorter [Medicago truncatula]"		arahy.Tifrunner.gnm1.ann1.023UF6.1	412	S	probable ADP-ribosylation factor GTPase-activating protein AGD6 [Arachis duranensis]		arahy.Tifrunner.gnm1.ann1.07091Z.1	"mono/di-acylglycerol lipase, amino-terminal [Medicago truncatula]"
arahy.Tifrunner.gnm1.ann1.92FQ09.1	79	S	IRK-interacting protein [Arachis ipaensis]		arahy.Tifrunner.gnm1.ann1.WFX79I.1	18	S	KH domain-containing protein At4g18375 isoform X1 [Arachis ipaensis]		arahy.Tifrunner.gnm1.ann1.023UF6.1	446	S	probable ADP-ribosylation factor GTPase-activating protein AGD6 [Arachis duranensis]		arahy.Tifrunner.gnm1.ann1.078CEZ.1	type I inositol polyphosphate 5-phosphatase 2-like isoform X1 [Arachis duranensis]
arahy.Tifrunner.gnm1.ann1.W27CY8.2	581	S	DUF668 family protein [Medicago truncatula]		arahy.Tifrunner.gnm1.ann1.P4R1Y8.1	375	S	"protein CHUP1, chloroplastic-like [Arachis ipaensis]"		arahy.Tifrunner.gnm1.ann1.03DKLN.1	38	S	MLP-like protein 423 [Arachis ipaensis]		arahy.Tifrunner.gnm1.ann1.07YC75.1	dynamin-2A-like [Arachis ipaensis]
arahy.Tifrunner.gnm1.ann1.BAML4E.1	520	S	"RING/FYVE/PHD zinc finger protein, putative [Medicago truncatula]"		arahy.Tifrunner.gnm1.ann1.UXYQ10.1	461	S	uridine-cytidine kinase C-like isoform X1 [Arachis ipaensis]		arahy.Tifrunner.gnm1.ann1.03F3RZ.2	52	S	protein PHR1-LIKE 1-like isoform X1 [Arachis duranensis]		arahy.Tifrunner.gnm1.ann1.08S4VV.2	65-kDa microtubule-associated protein 1-like [Arachis ipaensis]
arahy.Tifrunner.gnm1.ann1.J65KEH.1	168	S	serine/arginine-rich SC35-like splicing factor SCL30 [Arachis ipaensis]		arahy.Tifrunner.gnm1.ann1.J916II.1	61	S	protein SAD1/UNC-84 domain protein 1-like [Arachis duranensis]		arahy.Tifrunner.gnm1.ann1.03HQ02	2144	S	ATP-dependent helicase BRM isoform X1 [Arachis ipaensis]		arahy.Tifrunner.gnm1.ann1.099TXP.1	putative E3 ubiquitin-protein ligase RF298 [Arachis ipaensis]
arahy.Tifrunner.gnm1.ann1.3YB7R6.2	406	S	prolyl-tRNA synthetase associated domain-containing protein 1-like [Lupinus angustifolius]		arahy.Tifrunner.gnm1.ann1.C14L30.1	187	S	cellulose synthase A catalytic subunit 1 [UDP-forming]-like [Arachis ipaensis]		arahy.Tifrunner.gnm1.ann1.04I11T.1	241	S	E3 ubiquitin-protein ligase RHF1A-like [Arachis ipaensis]		arahy.Tifrunner.gnm1.ann1.09XT1N.1	probable protein S-acyltransferase 7 [Arachis duranensis]
arahy.Tifrunner.gnm1.ann1.56Z8NU.1	36	S	"uridine kinase-like protein 2, chloroplastic [Arachis ipaensis]"		arahy.Tifrunner.gnm1.ann1.L7TZBM.1	422	S	RNA-binding (RRM/RBD/RNP motif) family protein [Medicago truncatula]		arahy.Tifrunner.gnm1.ann1.04JW1L.2	148	S	mitogen-activated protein kinase kinase kinase YODA-like isoform X3 [Arachis duranensis]		arahy.Tifrunner.gnm1.ann1.0AQ0IW.3	U1 small nuclear ribonucleoprotein 70 kDa-like [Cajanus cajan]
arahy.Tifrunner.gnm1.ann1.UDXZ3L.1	411	S	casein kinase I-like [Arachis ipaensis]		arahy.Tifrunner.gnm1.ann1.U15FS5.1	145	S	Uncharacterized conserved protein UCP031279 [Arabidopsis thaliana]		arahy.Tifrunner.gnm1.ann1.04JW1L.2	156	S	mitogen-activated protein kinase kinase kinase YODA-like isoform X3 [Arachis duranensis]		arahy.Tifrunner.gnm1.ann1.0ASR8J.1	transcription factor bHLH128-like [Arachis ipaensis]
arahy.Tifrunner.gnm1.ann1.4P5PRD.1	624	T	nucleolin 2 isoform X1 [Glycine max]		arahy.Tifrunner.gnm1.ann1.PW4F55.1	573	S	probable serine/threonine-protein kinase WNK5 [Arachis ipaensis]		arahy.Tifrunner.gnm1.ann1.04JW1L.2	163	S	mitogen-activated protein kinase kinase kinase YODA-like isoform X3 [Arachis duranensis]		arahy.Tifrunner.gnm1.ann1.0B3TGP.1	linoleate 9S-lipoxygenase-like [Arachis ipaensis]
arahy.Tifrunner.gnm1.ann1.ZL8L46.2	222	T	MLO-like protein 10 [Arachis ipaensis]		arahy.Tifrunner.gnm1.ann1.92FQ09.1	79	S	IRK-interacting protein [Arachis ipaensis]		arahy.Tifrunner.gnm1.ann1.05VQV1.1	370	S	"arogenate dehydrogenase 1, chloroplastic-like [Arachis ipaensis]"		arahy.Tifrunner.gnm1.ann1.0B6IYK.2	GEM-like protein 1 [Arachis duranensis]
arahy.Tifrunner.gnm1.ann1.4D2SB5.2	109	S	suppressor protein SRP40-like [Ziziphus jujuba]		arahy.Tifrunner.gnm1.ann1.BAML4E.1	520	S	"RING/FYVE/PHD zinc finger protein, putative [Medicago truncatula]"		arahy.Tifrunner.gnm1.ann1.06L841	475	S	TBC1 domain family member 5 homolog A-like [Arachis ipaensis]		arahy.Tifrunner.gnm1.ann1.0B7PBW.1	aldehyde dehydrogenase family 3 member H1-like [Arachis duranensis]
arahy.Tifrunner.gnm1.ann1.9QIA1G.1	859	S	probable inactive leucine-rich repeat receptor-like protein kinase At3g03770 isoform X1 [Arachis ipaensis]		arahy.Tifrunner.gnm1.ann1.8R27D6.1	804	S	cell division cycle and apoptosis regulator protein 1 [Arachis duranensis]		arahy.Tifrunner.gnm1.ann1.06XI81	413	S	"pentatricopeptide repeat-containing protein At1g26460, mitochondrial [Arachis duranensis]"		arahy.Tifrunner.gnm1.ann1.0BLG9X.1	basic leucine zipper 34-like [Arachis ipaensis]
arahy.Tifrunner.gnm1.ann1.T383Y7.3	389	S	formin-like protein 6 [Arachis ipaensis]		arahy.Tifrunner.gnm1.ann1.J65KEH.1	168	S	serine/arginine-rich SC35-like splicing factor SCL30 [Arachis ipaensis]		arahy.Tifrunner.gnm1.ann1.06XI81	624	S	"pentatricopeptide repeat-containing protein At1g26460, mitochondrial [Arachis duranensis]"		arahy.Tifrunner.gnm1.ann1.0CFS5U.2	DEAD-box ATP-dependent RNA helicase 20-like [Arachis duranensis]
arahy.Tifrunner.gnm1.ann1.46GERB.2	341	S	kinesin-like protein KCA2 [Arachis ipaensis]		arahy.Tifrunner.gnm1.ann1.88FPG1.1	64	S	zinc finger CCCH domain-containing protein 13-like isoform X2 [Vigna radiata var. radiata]		arahy.Tifrunner.gnm1.ann1.07091Z.1	413	S	"mono/di-acylglycerol lipase, amino-terminal [Medicago truncatula]"		arahy.Tifrunner.gnm1.ann1.0CQZ6Z.1	pentatricopeptide repeat-containing protein At1g19720 [Arachis duranensis]
arahy.Tifrunner.gnm1.ann1.D2DMXG.1	262	S	"glyceraldehyde-3-phosphate dehydrogenase A, chloroplastic [Arachis ipaensis]"		arahy.Tifrunner.gnm1.ann1.UDXZ3L.1	411	S	casein kinase I-like [Arachis ipaensis]		arahy.Tifrunner.gnm1.ann1.078CEZ.1	206	S	type I inositol polyphosphate 5-phosphatase 2-like isoform X1 [Arachis duranensis]		arahy.Tifrunner.gnm1.ann1.0DG4WJ.1	ribonuclease P protein subunit p25-like protein [Arachis ipaensis]
arahy.Tifrunner.gnm1.ann1.7WD3SA.2	309	S	serine/arginine-rich splicing factor SR45 [Arachis duranensis]		arahy.Tifrunner.gnm1.ann1.PHM8DT.1	487	S	U-box domain-containing protein 4-like isoform X1 [Arachis ipaensis]		arahy.Tifrunner.gnm1.ann1.07YC75.1	531	S	dynamin-2A-like [Arachis ipaensis]		arahy.Tifrunner.gnm1.ann1.0DR8L1	UDP-N-acetylglucosamine--dolichyl-phosphate N-acetylglucosaminephosphotransferase [Arachis duranensis]
arahy.Tifrunner.gnm1.ann1.Y9QREV.1	721	S	ABC transporter D family member 1-like [Arachis ipaensis]		arahy.Tifrunner.gnm1.ann1.QZYV06.4	210	S	probable aldo-keto reductase 2 [Arachis duranensis]		arahy.Tifrunner.gnm1.ann1.07YC75.1	535	S	dynamin-2A-like [Arachis ipaensis]		arahy.Tifrunner.gnm1.ann1.0F1111	abscisic acid receptor PYL4-like [Arachis duranensis]
arahy.Tifrunner.gnm1.ann1.6441EL.1	81	S	translation machinery associated TMA7 protein [Medicago truncatula]		arahy.Tifrunner.gnm1.ann1.3SV7H4.1	4	S	CDK-activating kinase assembly factor MAT1 [Arachis ipaensis]		arahy.Tifrunner.gnm1.ann1.07YC75.1	876	S	dynamin-2A-like [Arachis ipaensis]		arahy.Tifrunner.gnm1.ann1.0F1BT2.1	RAB6A-GEF complex partner protein 1-like isoform X1 [Arachis duranensis]
arahy.Tifrunner.gnm1.ann1.63P8XR.1	231	S	nuclear pore complex protein NUP50A [Arachis ipaensis]		arahy.Tifrunner.gnm1.ann1.4D2SB5.2	109	S	suppressor protein SRP40-like [Ziziphus jujuba]		arahy.Tifrunner.gnm1.ann1.08S4VV.2	582	S	65-kDa microtubule-associated protein 1-like [Arachis ipaensis]		arahy.Tifrunner.gnm1.ann1.0F1RE7.1	serine/threonine-protein kinase EDR1 [Arachis ipaensis]
arahy.Tifrunner.gnm1.ann1.Q95X63.1	476	S	SEC1 family transport protein SLY1 [Arachis ipaensis]		arahy.Tifrunner.gnm1.ann1.9QIA1G.1	859	S	probable inactive leucine-rich repeat receptor-like protein kinase At3g03770 isoform X1 [Arachis ipaensis]		arahy.Tifrunner.gnm1.ann1.099TXP.1	169	S	putative E3 ubiquitin-protein ligase RF298 [Arachis ipaensis]		arahy.Tifrunner.gnm1.ann1.0H0AT1	membrane protein of ER body-like protein isoform X2 [Arachis duranensis]
arahy.Tifrunner.gnm1.ann1.W0EE9C.1	217	T	cellulose synthase A catalytic subunit 3 [UDP-forming]-like [Arachis duranensis]		arahy.Tifrunner.gnm1.ann1.KDE77Y.4	318	T	pumilio homolog 2-like [Arachis ipaensis]		arahy.Tifrunner.gnm1.ann1.09XT1N.1	337	S	probable protein S-acyltransferase 7 [Arachis duranensis]		arahy.Tifrunner.gnm1.ann1.0M4231	hexon [Arabidopsis thaliana]
arahy.Tifrunner.gnm1.ann1.K398AB.1	467	S	probable NOT transcription complex subunit VIP2 isoform X1 [Arachis ipaensis]		arahy.Tifrunner.gnm1.ann1.IMA97E.2	197	S	lys-63-specific deubiquitinase BRCC36-like [Arachis ipaensis]		arahy.Tifrunner.gnm1.ann1.0AQ0IW.3	174	S	U1 small nuclear ribonucleoprotein 70 kDa-like [Cajanus cajan]		arahy.Tifrunner.gnm1.ann1.0N5IZ1	LOW QUALITY PROTEIN: transcription elongation factor B polypeptide 3-like [Arachis ipaensis]
arahy.Tifrunner.gnm1.ann1.U6QWXY.1	147	S	protein PHR1-LIKE 1 [Arachis ipaensis]		arahy.Tifrunner.gnm1.ann1.T383Y7.3	389	S	formin-like protein 6 [Arachis ipaensis]		arahy.Tifrunner.gnm1.ann1.0AQ0IW.3	282	S	U1 small nuclear ribonucleoprotein 70 kDa-like [Cajanus cajan]		arahy.Tifrunner.gnm1.ann1.0NLM3R.1	zinc finger CCCH domain-containing protein 37-like isoform X1 [Arachis duranensis]
arahy.Tifrunner.gnm1.ann1.C37FLM.1	196	S	ras-related protein RABB1c [Arachis ipaensis]		arahy.Tifrunner.gnm1.ann1.VZ1HH7.2	628	S	ABC transporter B family member 6-like [Arachis ipaensis]		arahy.Tifrunner.gnm1.ann1.0AQ0IW.3	399	S	U1 small nuclear ribonucleoprotein 70 kDa-like [Cajanus cajan]		arahy.Tifrunner.gnm1.ann1.0QF2GW.1	AUGMIN subunit 6 [Arachis ipaensis]
arahy.Tifrunner.gnm1.ann1.L76SLB.1	253	S	auxin efflux carrier component 1 [Arachis duranensis]		arahy.Tifrunner.gnm1.ann1.V9A7GH.1	147	S	ADP-ribosylation factor 2 [Cucumis melo]		arahy.Tifrunner.gnm1.ann1.0AQ0IW.3	401	S	U1 small nuclear ribonucleoprotein 70 kDa-like [Cajanus cajan]		arahy.Tifrunner.gnm1.ann1.0QZG7W.1	SPOC domain protein [Medicago truncatula]
arahy.Tifrunner.gnm1.ann1.MS128A.1	61	S	proteasome subunit alpha type-4-like [Arachis ipaensis]		arahy.Tifrunner.gnm1.ann1.46GERB.2	341	S	kinesin-like protein KCA2 [Arachis ipaensis]		arahy.Tifrunner.gnm1.ann1.0ASR8J.1	29	S	transcription factor bHLH128-like [Arachis ipaensis]		arahy.Tifrunner.gnm1.ann1.0QZJ52	dynamin-related protein 1E-like [Arachis ipaensis]
arahy.Tifrunner.gnm1.ann1.FR3P05.1	525	S	transcription initiation factor TFIID subunit 12 isoform X1 [Arachis duranensis]		arahy.Tifrunner.gnm1.ann1.5A5JTD.2	507	S	peptidyl-prolyl cis-trans isomerase CYP95 isoform X2 [Arachis ipaensis]		arahy.Tifrunner.gnm1.ann1.0ASR8J.1	152	S	transcription factor bHLH128-like [Arachis ipaensis]		arahy.Tifrunner.gnm1.ann1.0R8S6T.2	plant UBX domain-containing protein 4-like isoform X1 [Arachis duranensis]
arahy.Tifrunner.gnm1.ann1.2022SK.2	640	S	protein transport protein SEC23 [Arachis ipaensis]		arahy.Tifrunner.gnm1.ann1.D2DMXG.1	262	S	"glyceraldehyde-3-phosphate dehydrogenase A, chloroplastic [Arachis ipaensis]"		arahy.Tifrunner.gnm1.ann1.0B3TGP.1	275	S	linoleate 9S-lipoxygenase-like [Arachis ipaensis]		arahy.Tifrunner.gnm1.ann1.0RG3QL.1	calmodulin-like protein 1 [Arachis ipaensis]
arahy.Tifrunner.gnm1.ann1.9178ZA.2	83	S	vacuolar amino acid transporter 1 isoform X1 [Arachis duranensis]		arahy.Tifrunner.gnm1.ann1.K2PXHZ.1	397	S	serine/arginine-rich splicing factor SR45 [Arachis ipaensis]		arahy.Tifrunner.gnm1.ann1.0B6IYK.2	105	S	GEM-like protein 1 [Arachis duranensis]		arahy.Tifrunner.gnm1.ann1.0RL0PX.1	LOW QUALITY PROTEIN: DEAD-box ATP-dependent RNA helicase 40-like [Arachis ipaensis]
arahy.Tifrunner.gnm1.ann1.16GZH2.1	83	S	lysine-rich arabinogalactan protein 19-like [Arachis duranensis]		arahy.Tifrunner.gnm1.ann1.7WD3SA.2	309	S	serine/arginine-rich splicing factor SR45 [Arachis duranensis]		arahy.Tifrunner.gnm1.ann1.0B6IYK.2	224	S	GEM-like protein 1 [Arachis duranensis]		arahy.Tifrunner.gnm1.ann1.0UF999.1	ethylene-responsive transcription factor ABR1-like [Arachis ipaensis]
arahy.Tifrunner.gnm1.ann1.PUEI6W.1	75	S	serine/threonine-protein kinase CTR1 [Arachis ipaensis]		arahy.Tifrunner.gnm1.ann1.Y9QREV.1	721	S	ABC transporter D family member 1-like [Arachis ipaensis]		arahy.Tifrunner.gnm1.ann1.0B7PBW.1	453	S	aldehyde dehydrogenase family 3 member H1-like [Arachis duranensis]		arahy.Tifrunner.gnm1.ann1.0UKE5Q.1	CTP synthase [Arachis ipaensis]
arahy.Tifrunner.gnm1.ann1.H7PRHK.1	48	T	probable calcium-binding protein CML36 [Arachis ipaensis]		arahy.Tifrunner.gnm1.ann1.1G1J9V.1	88	S	dormancy-associated protein homolog 3-like isoform X2 [Cajanus cajan]		arahy.Tifrunner.gnm1.ann1.0BLG9X.1	317	S	basic leucine zipper 34-like [Arachis ipaensis]		arahy.Tifrunner.gnm1.ann1.0UNU52.1	seed linoleate 9S-lipoxygenase-like [Arachis ipaensis]
arahy.Tifrunner.gnm1.ann1.C4VIYD.2	19	S	"P-loop nucleoside triphosphate hydrolase superfamily protein, putative [Medicago truncatula]"		arahy.Tifrunner.gnm1.ann1.3J71J7.1	82	S	protein SAD1/UNC-84 domain protein 1-like [Arachis ipaensis]		arahy.Tifrunner.gnm1.ann1.0CFS5U.2	96	S	DEAD-box ATP-dependent RNA helicase 20-like [Arachis duranensis]		arahy.Tifrunner.gnm1.ann1.0V2EN1.2	fimbrin-5-like [Arachis ipaensis]
arahy.Tifrunner.gnm1.ann1.MT7PBJ.1	83	T	"50S ribosomal protein L22, chloroplastic-like [Arachis ipaensis]"		arahy.Tifrunner.gnm1.ann1.IPV3B4.1	83	S	CDP-diacylglycerol--glycerol-3-phosphate 3-phosphatidyltransferase 2-like [Arachis ipaensis]		arahy.Tifrunner.gnm1.ann1.0DR8L1	14	S	UDP-N-acetylglucosamine--dolichyl-phosphate N-acetylglucosaminephosphotransferase [Arachis duranensis]		arahy.Tifrunner.gnm1.ann1.0W0WA1	zinc finger CCCH domain-containing protein 13 [Arachis duranensis]
arahy.Tifrunner.gnm1.ann1.EKN3RA.1	33	T	sugar transporter ERD6-like 6 isoform X1 [Arachis duranensis]		arahy.Tifrunner.gnm1.ann1.6441EL.1	81	S	translation machinery associated TMA7 protein [Medicago truncatula]		arahy.Tifrunner.gnm1.ann1.0F1111	3	S	abscisic acid receptor PYL4-like [Arachis duranensis]		arahy.Tifrunner.gnm1.ann1.0WKN81	translation initiation factor IF-2 isoform X2 [Arachis ipaensis]
arahy.Tifrunner.gnm1.ann1.H0R63D.3	265	S	phosphatidylinositol 4-kinase beta 1-like [Arachis duranensis]		arahy.Tifrunner.gnm1.ann1.63P8XR.1	231	S	nuclear pore complex protein NUP50A [Arachis ipaensis]		arahy.Tifrunner.gnm1.ann1.0F1BT2.1	939	S	RAB6A-GEF complex partner protein 1-like isoform X1 [Arachis duranensis]		arahy.Tifrunner.gnm1.ann1.0X3R4P.1	protease Do-like 9 [Arachis duranensis]
arahy.Tifrunner.gnm1.ann1.1GCN3K.1	52	S			arahy.Tifrunner.gnm1.ann1.Q95X63.1	476	S	SEC1 family transport protein SLY1 [Arachis ipaensis]		arahy.Tifrunner.gnm1.ann1.0F1RE7.1	525	S	serine/threonine-protein kinase EDR1 [Arachis ipaensis]		arahy.Tifrunner.gnm1.ann1.0XH4E1	putative disease resistance protein At3g14460 isoform X1 [Arachis duranensis]
arahy.Tifrunner.gnm1.ann1.U7X5PN.1	168	T	BAAT/acyl-CoA thioester hydrolase carboxy-terminal protein [Medicago truncatula]		arahy.Tifrunner.gnm1.ann1.FXE6P8.1	487	T	DUF630 family protein [Medicago truncatula]		arahy.Tifrunner.gnm1.ann1.0F1RE7.1	812	S	serine/threonine-protein kinase EDR1 [Arachis ipaensis]		arahy.Tifrunner.gnm1.ann1.0ZGE19.1	tetraspanin-3 [Arachis ipaensis]
arahy.Tifrunner.gnm1.ann1.NSCH3W.1	281	S	kinase-related family protein [Populus trichocarpa]		arahy.Tifrunner.gnm1.ann1.U3LBHC.1	14	S	probable flavonol synthase 4 [Arachis ipaensis]		arahy.Tifrunner.gnm1.ann1.0H0AT1	146	S	membrane protein of ER body-like protein isoform X2 [Arachis duranensis]		arahy.Tifrunner.gnm1.ann1.0ZR0U2	probable calcium-binding protein CML22 [Arachis ipaensis]
arahy.Tifrunner.gnm1.ann1.QV8INP.1	193	S	2-keto-3-deoxy-L-rhamnonate aldolase-like [Arachis duranensis]		arahy.Tifrunner.gnm1.ann1.P2RW1V.1	512	S	calcium-dependent protein kinase 28-like [Arachis duranensis]		arahy.Tifrunner.gnm1.ann1.0H0AT1	291	S	membrane protein of ER body-like protein isoform X2 [Arachis duranensis]		arahy.Tifrunner.gnm1.ann1.102QY2	probable protein phosphatase 2C 52 [Arachis ipaensis]
arahy.Tifrunner.gnm1.ann1.581AXD.3	468	S	serine/threonine-protein phosphatase 6 regulatory subunit 3 isoform X2 [Arachis duranensis]		arahy.Tifrunner.gnm1.ann1.GB2CGG.1	687	S	pre-mRNA-processing factor 39 isoform X2 [Arachis ipaensis]		arahy.Tifrunner.gnm1.ann1.0M4231	109	S	hexon [Arabidopsis thaliana]		arahy.Tifrunner.gnm1.ann1.11BQ2X.4	serine/arginine-rich splicing factor RS31-like isoform X1 [Arachis ipaensis]
arahy.Tifrunner.gnm1.ann1.X6L8L6.1	644	S	ethylene response sensor 1 [Arachis ipaensis]		arahy.Tifrunner.gnm1.ann1.C96M7R.2	38	S	UDP-glucuronic acid decarboxylase 5-like [Arachis ipaensis]		arahy.Tifrunner.gnm1.ann1.0N5IZ1	220	S	LOW QUALITY PROTEIN: transcription elongation factor B polypeptide 3-like [Arachis ipaensis]		arahy.Tifrunner.gnm1.ann1.11JIMN.1	probable protein S-acyltransferase 7 [Arachis duranensis]
arahy.Tifrunner.gnm1.ann1.U2QYCA.1	117	S	stem-specific protein TSJT1 [Arachis ipaensis]		arahy.Tifrunner.gnm1.ann1.M6FCCP.1	268	T	pumilio homolog 2-like [Arachis duranensis]		arahy.Tifrunner.gnm1.ann1.0NLM3R.1	15	S	zinc finger CCCH domain-containing protein 37-like isoform X1 [Arachis duranensis]		arahy.Tifrunner.gnm1.ann1.11NDUV.1	LOW QUALITY PROTEIN: probable protein phosphatase 2C 33 [Arachis duranensis]
arahy.Tifrunner.gnm1.ann1.TI92NW.1	523	S	protein IQ-DOMAIN 1 isoform X1 [Arachis duranensis]		arahy.Tifrunner.gnm1.ann1.E7IC8N.1	672	S	putative kinase-like protein TMKL1 [Arachis duranensis]		arahy.Tifrunner.gnm1.ann1.0QF2GW.1	462	S	AUGMIN subunit 6 [Arachis ipaensis]		arahy.Tifrunner.gnm1.ann1.11NJV3.3	gastric triacylglycerol lipase-like [Arachis ipaensis]
arahy.Tifrunner.gnm1.ann1.R3C42M.2	90	S	"superoxide dismutase [Mn], mitochondrial-like [Arachis duranensis]"		arahy.Tifrunner.gnm1.ann1.7NR7Q4.1	311	S	serine/arginine-rich splicing factor SR45 [Arachis ipaensis]		arahy.Tifrunner.gnm1.ann1.0QZG7W.1	556	S	SPOC domain protein [Medicago truncatula]		arahy.Tifrunner.gnm1.ann1.11V3F3.1	late embryogenesis abundant protein [Medicago truncatula]
arahy.Tifrunner.gnm1.ann1.5E2SWH.1	9	S	MLP-like protein 43 [Arachis duranensis]		arahy.Tifrunner.gnm1.ann1.K398AB.1	467	S	probable NOT transcription complex subunit VIP2 isoform X1 [Arachis ipaensis]		arahy.Tifrunner.gnm1.ann1.0QZG7W.1	783	S	SPOC domain protein [Medicago truncatula]		arahy.Tifrunner.gnm1.ann1.132VH2	"phosphatidylinositol 3,4,5-trisphosphate 3-phosphatase and protein-tyrosine-phosphatase PTEN2A-like[Arachis ipaensis]"
arahy.Tifrunner.gnm1.ann1.EU6ASS.1	86	S	plant UBX domain-containing protein 9-like [Arachis ipaensis]		arahy.Tifrunner.gnm1.ann1.U6QWXY.1	147	S	protein PHR1-LIKE 1 [Arachis ipaensis]		arahy.Tifrunner.gnm1.ann1.0QZG7W.1	793	S	SPOC domain protein [Medicago truncatula]		arahy.Tifrunner.gnm1.ann1.13DKA1	trypsin family protein [Medicago truncatula]
arahy.Tifrunner.gnm1.ann1.U0AKQE.1	20	T	conserved oligomeric Golgi complex subunit 1 [Arachis duranensis]		arahy.Tifrunner.gnm1.ann1.C37FLM.1	196	S	ras-related protein RABB1c [Arachis ipaensis]		arahy.Tifrunner.gnm1.ann1.0QZG7W.1	802	S	SPOC domain protein [Medicago truncatula]		arahy.Tifrunner.gnm1.ann1.14AZR1	phytolongin Phyl1.1 [Arachis ipaensis]
arahy.Tifrunner.gnm1.ann1.L1PMVE.1	601	T	BAH domain-containing protein [Medicago truncatula]		arahy.Tifrunner.gnm1.ann1.Q0I0E2.2	477	S	NADPH--cytochrome P450 reductase [Arachis ipaensis]		arahy.Tifrunner.gnm1.ann1.0QZG7W.1	958	S	SPOC domain protein [Medicago truncatula]		arahy.Tifrunner.gnm1.ann1.159H25.2	aldehyde dehydrogenase family 7 member A1 [Arachis duranensis]
arahy.Tifrunner.gnm1.ann1.V72G13.2	370	S	aluminum-activated malate transporter 9-like isoform X2 [Arachis duranensis]		arahy.Tifrunner.gnm1.ann1.SRJ81T.2	222	S	IST1-like protein [Arachis duranensis]		arahy.Tifrunner.gnm1.ann1.0QZJ52	335	S	dynamin-related protein 1E-like [Arachis ipaensis]		arahy.Tifrunner.gnm1.ann1.15A7A2	probable GMP synthase [glutamine-hydrolyzing] [Glycine max]
arahy.Tifrunner.gnm1.ann1.E5GBGH.1	81	S	serine/threonine-protein kinase GRIK2-like [Arachis duranensis]		arahy.Tifrunner.gnm1.ann1.JMY4T5.1	435	T	DDB1- and CUL4-associated factor 8 [Arachis ipaensis]		arahy.Tifrunner.gnm1.ann1.0R8S6T.2	109	S	plant UBX domain-containing protein 4-like isoform X1 [Arachis duranensis]		arahy.Tifrunner.gnm1.ann1.15IZES.1	myb-like protein H isoform X1 [Populus euphratica]
arahy.Tifrunner.gnm1.ann1.FT1LK2.1	14	S	epsin-3-like [Arachis ipaensis]		arahy.Tifrunner.gnm1.ann1.MS128A.1	61	S	proteasome subunit alpha type-4-like [Arachis ipaensis]		arahy.Tifrunner.gnm1.ann1.0R8S6T.2	111	S	plant UBX domain-containing protein 4-like isoform X1 [Arachis duranensis]		arahy.Tifrunner.gnm1.ann1.16AZTT.1	autophagy-related protein 18c-like [Arachis duranensis]
arahy.Tifrunner.gnm1.ann1.Y7PKX5.1	676	S	FIP1[V]-like protein [Arachis ipaensis]		arahy.Tifrunner.gnm1.ann1.FUW0JF.2	944	S	"LOW QUALITY PROTEIN: TMV resistance protein N-like, partial [Arachis duranensis]"		arahy.Tifrunner.gnm1.ann1.0R8S6T.2	216	S	plant UBX domain-containing protein 4-like isoform X1 [Arachis duranensis]		arahy.Tifrunner.gnm1.ann1.16GZH2.1	lysine-rich arabinogalactan protein 19-like [Arachis duranensis]
arahy.Tifrunner.gnm1.ann1.AUQB01.1	349	S	latex abundant protein 1 [Populus trichocarpa]		arahy.Tifrunner.gnm1.ann1.D42UYZ.2	14	S	nodulin-related protein 1-like [Cajanus cajan]		arahy.Tifrunner.gnm1.ann1.0RG3QL.1	32	S	calmodulin-like protein 1 [Arachis ipaensis]		arahy.Tifrunner.gnm1.ann1.173QH1	1-aminocyclopropane-1-carboxylate oxidase homolog 1-like [Arachis ipaensis]
arahy.Tifrunner.gnm1.ann1.RY2Y1Z.1	28	T	auxin-repressed 12.5 kDa protein-like [Arachis ipaensis]		arahy.Tifrunner.gnm1.ann1.3X8NRX.1	82	S	heat shock cognate 70 kDa protein 2 [Arachis ipaensis]		arahy.Tifrunner.gnm1.ann1.0RL0PX.1	1106	S	LOW QUALITY PROTEIN: DEAD-box ATP-dependent RNA helicase 40-like [Arachis ipaensis]		arahy.Tifrunner.gnm1.ann1.17PB5S.1	LOW QUALITY PROTEIN: ankyrin-3-like [Arachis ipaensis]
arahy.Tifrunner.gnm1.ann1.UKMX5Y.1	60	S	zinc finger (C3HC4-type RING finger) family protein [Medicago truncatula]		arahy.Tifrunner.gnm1.ann1.FT1LK2.1	193	S	epsin-3-like [Arachis ipaensis]		arahy.Tifrunner.gnm1.ann1.0RL0PX.1	1108	S	LOW QUALITY PROTEIN: DEAD-box ATP-dependent RNA helicase 40-like [Arachis ipaensis]		arahy.Tifrunner.gnm1.ann1.180UY1	translation initiation factor IF-2-like [Arachis ipaensis]
arahy.Tifrunner.gnm1.ann1.88CVAX.1	1114	S	topless-related protein 3 [Arachis duranensis]		arahy.Tifrunner.gnm1.ann1.FR3P05.1	525	S	transcription initiation factor TFIID subunit 12 isoform X1 [Arachis duranensis]		arahy.Tifrunner.gnm1.ann1.0UF999.1	43	S	ethylene-responsive transcription factor ABR1-like [Arachis ipaensis]		arahy.Tifrunner.gnm1.ann1.185U53	ras-related protein RABE1a [Arachis ipaensis]
arahy.Tifrunner.gnm1.ann1.NA9FDR.1	5	T	transcription factor MYB98-like [Arachis ipaensis]		arahy.Tifrunner.gnm1.ann1.SPI7HB.1	206	S	BES1/BZR1 homolog protein 2 [Arachis ipaensis]		arahy.Tifrunner.gnm1.ann1.0UKE5Q.1	532	S	CTP synthase [Arachis ipaensis]		arahy.Tifrunner.gnm1.ann1.18AW2L.2	protein transport protein SEC31 homolog B [Arachis duranensis]
arahy.Tifrunner.gnm1.ann1.1SB5R1.1	22	S	ubiquitin carboxyl-terminal hydrolase 2 [Arachis duranensis]		arahy.Tifrunner.gnm1.ann1.70JD05.1	147	S	HMG-Y-related protein A-like [Arachis duranensis]		arahy.Tifrunner.gnm1.ann1.0V2EN1.2	107	S	fimbrin-5-like [Arachis ipaensis]		arahy.Tifrunner.gnm1.ann1.18DP1Z.1	late embryogenesis abundant protein [Medicago truncatula]
arahy.Tifrunner.gnm1.ann1.D6D033.1	406	S	serine/arginine repetitive matrix protein 2 [Arachis duranensis]		arahy.Tifrunner.gnm1.ann1.2022SK.2	640	S	protein transport protein SEC23 [Arachis ipaensis]		arahy.Tifrunner.gnm1.ann1.0W0WA1	67	S	zinc finger CCCH domain-containing protein 13 [Arachis duranensis]		arahy.Tifrunner.gnm1.ann1.18FPP0.1	meiosis chromosome segregation family protein [Medicago truncatula]
arahy.Tifrunner.gnm1.ann1.LPXF14.1	59	S	glutamine synthetase nodule isozyme [Arachis ipaensis]		arahy.Tifrunner.gnm1.ann1.SPQ4E9.4	27	S	calcium-dependent protein kinase 26 [Arachis ipaensis]		arahy.Tifrunner.gnm1.ann1.0WKN81	130	S	translation initiation factor IF-2 isoform X2 [Arachis ipaensis]		arahy.Tifrunner.gnm1.ann1.18JCSN.1	sucrose synthase 7-like [Arachis ipaensis]
arahy.Tifrunner.gnm1.ann1.S5T91D.2	181	S	uncharacterized membrane protein At1g16860-like [Arachis ipaensis]		arahy.Tifrunner.gnm1.ann1.IQ8CLR.2	1321	S	protein TSS [Arachis duranensis]		arahy.Tifrunner.gnm1.ann1.0WKN81	253	S	translation initiation factor IF-2 isoform X2 [Arachis ipaensis]		arahy.Tifrunner.gnm1.ann1.18SBF2	zinc finger CCCH domain-containing protein 18-like [Arachis duranensis]
arahy.Tifrunner.gnm1.ann1.CI62AJ.2	1006	S	E3 ubiquitin-protein ligase UPL1-like [Arachis duranensis]		arahy.Tifrunner.gnm1.ann1.16GZH2.1	83	S	lysine-rich arabinogalactan protein 19-like [Arachis duranensis]		arahy.Tifrunner.gnm1.ann1.0WKN81	269	S	translation initiation factor IF-2 isoform X2 [Arachis ipaensis]		arahy.Tifrunner.gnm1.ann1.18SBF3	zinc finger CCCH domain-containing protein 18-like [Arachis duranensis]
arahy.Tifrunner.gnm1.ann1.949BMZ.1	568	S	zinc ion-binding protein [Medicago truncatula]		arahy.Tifrunner.gnm1.ann1.PUEI6W.1	75	S	serine/threonine-protein kinase CTR1 [Arachis ipaensis]		arahy.Tifrunner.gnm1.ann1.0X3R4P.1	22	S	protease Do-like 9 [Arachis duranensis]		arahy.Tifrunner.gnm1.ann1.18T4M1	ubiquitin carboxyl-terminal hydrolase MINDY-2 isoform X2 [Cajanus cajan]
arahy.Tifrunner.gnm1.ann1.04JW1L.2	156	S	mitogen-activated protein kinase kinase kinase YODA-like isoform X3 [Arachis duranensis]		arahy.Tifrunner.gnm1.ann1.CKNT4J.2	828	S	regulator of chromosome condensation (RCC1) family protein [Medicago truncatula]		arahy.Tifrunner.gnm1.ann1.0X3R4P.1	72	S	protease Do-like 9 [Arachis duranensis]		arahy.Tifrunner.gnm1.ann1.1B7IGJ.1	probable WRKY transcription factor 47 [Arachis ipaensis]
arahy.Tifrunner.gnm1.ann1.CQAX74.1	189	S	actin cross-linking protein [Medicago truncatula]		arahy.Tifrunner.gnm1.ann1.U08GD1.1	223	S	serine/arginine-rich splicing factor RS2Z32 isoform X1 [Arachis ipaensis]		arahy.Tifrunner.gnm1.ann1.0ZGE19.1	253	S	tetraspanin-3 [Arachis ipaensis]		arahy.Tifrunner.gnm1.ann1.1BJ025.1	protein enabled [Arachis duranensis]
arahy.Tifrunner.gnm1.ann1.XDTP3U.1	63	S	protein JASON isoform X1 [Arachis duranensis]		arahy.Tifrunner.gnm1.ann1.16GZH2.1	44	T	lysine-rich arabinogalactan protein 19-like [Arachis duranensis]		arahy.Tifrunner.gnm1.ann1.0ZR0U2	181	S	probable calcium-binding protein CML22 [Arachis ipaensis]		arahy.Tifrunner.gnm1.ann1.1D0QNK.1	UPF0400 protein C337.03 [Arachis duranensis]
arahy.Tifrunner.gnm1.ann1.MEE04S.1	748	S	"aconitate hydratase, cytoplasmic [Arachis ipaensis]"		arahy.Tifrunner.gnm1.ann1.QXM1B7.1	46	S	chlorophyll a-b binding protein of LHCII type 1-like [Arachis ipaensis]		arahy.Tifrunner.gnm1.ann1.0ZR0U2	183	S	probable calcium-binding protein CML22 [Arachis ipaensis]		arahy.Tifrunner.gnm1.ann1.1E00SW.2	polyadenylate-binding protein-interacting protein 7-like [Arachis ipaensis]
arahy.Tifrunner.gnm1.ann1.HCVK6G.4	161	S	aldo-keto reductase family 4 member C9-like [Arachis duranensis]		arahy.Tifrunner.gnm1.ann1.MT7PBJ.1	83	T	"50S ribosomal protein L22, chloroplastic-like [Arachis ipaensis]"		arahy.Tifrunner.gnm1.ann1.102QY2	246	S	probable protein phosphatase 2C 52 [Arachis ipaensis]		arahy.Tifrunner.gnm1.ann1.1EDB5Y.1	centrosomal protein of 164 kDa isoform X3 [Arachis ipaensis]
arahy.Tifrunner.gnm1.ann1.N1U5TX.5	114	S	josephin-like protein [Vigna angularis]		arahy.Tifrunner.gnm1.ann1.E495RS.2	336	S	CDPK-related kinase 5 [Arachis ipaensis]		arahy.Tifrunner.gnm1.ann1.11BQ2X.4	180	S	serine/arginine-rich splicing factor RS31-like isoform X1 [Arachis ipaensis]		arahy.Tifrunner.gnm1.ann1.1EJ222.1	lysine-rich arabinogalactan protein 19-like [Arachis duranensis]
arahy.Tifrunner.gnm1.ann1.YX753W.1	492	S	colon cancer-associated Mic1-like protein [Medicago truncatula]		arahy.Tifrunner.gnm1.ann1.LC6LGZ.1	449	S	putative G3BP-like protein isoform X1 [Arachis ipaensis]		arahy.Tifrunner.gnm1.ann1.11BQ2X.4	189	S	serine/arginine-rich splicing factor RS31-like isoform X1 [Arachis ipaensis]		arahy.Tifrunner.gnm1.ann1.1EL8LN.2	plant/T7H20-70 protein [Medicago truncatula]
arahy.Tifrunner.gnm1.ann1.61N80Q.1	944	T	SART-1 family protein DOT2 [Arachis ipaensis]		arahy.Tifrunner.gnm1.ann1.UVUE9D.1	223	S	tetraspanin-20 [Arachis duranensis]		arahy.Tifrunner.gnm1.ann1.11BQ2X.4	191	S	serine/arginine-rich splicing factor RS31-like isoform X1 [Arachis ipaensis]		arahy.Tifrunner.gnm1.ann1.1F18R3.2	probable magnesium transporter NIPA8 [Arachis ipaensis]
arahy.Tifrunner.gnm1.ann1.6K20QR.1	197	S	chaperone DnaJ-domain protein [Medicago truncatula]		arahy.Tifrunner.gnm1.ann1.ND79ZZ.1	422	S	casein kinase I-like [Arachis ipaensis]		arahy.Tifrunner.gnm1.ann1.11BQ2X.4	199	S	serine/arginine-rich splicing factor RS31-like isoform X1 [Arachis ipaensis]		arahy.Tifrunner.gnm1.ann1.1FV09I.1	epidermal growth factor receptor substrate 15-like 1 isoform X1 [Arachis duranensis]
arahy.Tifrunner.gnm1.ann1.J916II.1	72	S	protein SAD1/UNC-84 domain protein 1-like [Arachis duranensis]		arahy.Tifrunner.gnm1.ann1.73LV1S.3	192	S	probable ADP-ribosylation factor GTPase-activating protein AGD14 [Arachis duranensis]		arahy.Tifrunner.gnm1.ann1.11BQ2X.4	207	S	serine/arginine-rich splicing factor RS31-like isoform X1 [Arachis ipaensis]		arahy.Tifrunner.gnm1.ann1.1G1J9V.1	dormancy-associated protein homolog 3-like isoform X2 [Cajanus cajan]
arahy.Tifrunner.gnm1.ann1.B3C57W.3	94	S	autophagy-related protein 13a-like isoform X2 [Arachis ipaensis]		arahy.Tifrunner.gnm1.ann1.H0R63D.3	265	S	phosphatidylinositol 4-kinase beta 1-like [Arachis duranensis]		arahy.Tifrunner.gnm1.ann1.11BQ2X.4	223	S	serine/arginine-rich splicing factor RS31-like isoform X1 [Arachis ipaensis]		arahy.Tifrunner.gnm1.ann1.1GCN3K.1
arahy.Tifrunner.gnm1.ann1.YQJ5CI.1	258	S	binding partner of ACD11 1-like [Arachis duranensis]		arahy.Tifrunner.gnm1.ann1.51XJUZ.1	871	S	26S proteasome non-ATPase regulatory subunit 1 homolog A [Arachis ipaensis]		arahy.Tifrunner.gnm1.ann1.11BQ2X.4	231	S	serine/arginine-rich splicing factor RS31-like isoform X1 [Arachis ipaensis]		arahy.Tifrunner.gnm1.ann1.1H9ESI.1	outer envelope membrane protein 7 [Arachis ipaensis]
arahy.Tifrunner.gnm1.ann1.VSCY1A.2	158	S	lysine-specific histone demethylase 1 homolog 3 [Arachis ipaensis]		arahy.Tifrunner.gnm1.ann1.1GCN3K.1	52	S			arahy.Tifrunner.gnm1.ann1.11BQ2X.4	239	S	serine/arginine-rich splicing factor RS31-like isoform X1 [Arachis ipaensis]		arahy.Tifrunner.gnm1.ann1.1H9F4R.1	patellin-3-like [Arachis ipaensis]
arahy.Tifrunner.gnm1.ann1.EQL16Q.2	89	S	light-inducible protein CPRF2-like [Arachis duranensis]		arahy.Tifrunner.gnm1.ann1.UZ3GC4.1	88	S	"phosphoglycerate kinase, chloroplastic [Arachis ipaensis]"		arahy.Tifrunner.gnm1.ann1.11BQ2X.4	247	S	serine/arginine-rich splicing factor RS31-like isoform X1 [Arachis ipaensis]		arahy.Tifrunner.gnm1.ann1.1JAQ89.1	rhomboid-like protein 19 [Arachis duranensis]
arahy.Tifrunner.gnm1.ann1.6FX6NP.1	679	S	protein ENHANCED DISEASE RESISTANCE 4-like [Lupinus angustifolius]		arahy.Tifrunner.gnm1.ann1.SN40SK.2	153	T	SNF1-related protein kinase catalytic subunit alpha KIN10 [Arachis duranensis]		arahy.Tifrunner.gnm1.ann1.11JIMN.1	126	S	probable protein S-acyltransferase 7 [Arachis duranensis]		arahy.Tifrunner.gnm1.ann1.1JKV8J.1	"triosephosphate isomerase, chloroplastic [Arachis duranensis]"
arahy.Tifrunner.gnm1.ann1.V66673.1	15	S	probable serine/threonine-protein kinase NAK [Arachis duranensis]		arahy.Tifrunner.gnm1.ann1.NSCH3W.1	281	S	kinase-related family protein [Populus trichocarpa]		arahy.Tifrunner.gnm1.ann1.11JIMN.1	333	S	probable protein S-acyltransferase 7 [Arachis duranensis]		arahy.Tifrunner.gnm1.ann1.1JP5N1	far upstream element-binding protein 2-like [Arachis ipaensis]
arahy.Tifrunner.gnm1.ann1.A7Q2QI.2	559	S	proteinaceous RNase P 2 [Arachis ipaensis]		arahy.Tifrunner.gnm1.ann1.3I6JR3.1	23	S	conserved oligomeric Golgi complex subunit 5 [Arachis duranensis]		arahy.Tifrunner.gnm1.ann1.11NDUV.1	14	S	LOW QUALITY PROTEIN: probable protein phosphatase 2C 33 [Arachis duranensis]		arahy.Tifrunner.gnm1.ann1.1K6ZH2	two-component response regulator-like APRR7 isoform X1 [Arachis duranensis]
arahy.Tifrunner.gnm1.ann1.2H77W4.1	566	S	ethylene receptor 2 [Arachis ipaensis]		arahy.Tifrunner.gnm1.ann1.R6GQUS.2	495	S	GBF-interacting protein 1-like isoform X2 [Cajanus cajan]		arahy.Tifrunner.gnm1.ann1.11NDUV.1	35	S	LOW QUALITY PROTEIN: probable protein phosphatase 2C 33 [Arachis duranensis]		arahy.Tifrunner.gnm1.ann1.1M6YYJ.2	protein PAF1 homolog [Arachis ipaensis]
arahy.Tifrunner.gnm1.ann1.HHIB1Q.1	214	S	uncharacterized LOC100788810 [Glycine max]		arahy.Tifrunner.gnm1.ann1.71AIDN.2	186	S	splicing regulatory glutamine/lysine-rich protein 1 isoform X1 [Arachis ipaensis]		arahy.Tifrunner.gnm1.ann1.11NDUV.1	389	S	LOW QUALITY PROTEIN: probable protein phosphatase 2C 33 [Arachis duranensis]		arahy.Tifrunner.gnm1.ann1.1N9EH1	zinc finger protein 511 [Arachis ipaensis]
arahy.Tifrunner.gnm1.ann1.XT6BWY.1	533	S	probable inactive leucine-rich repeat receptor-like protein kinase At1g66830 [Arachis duranensis]		arahy.Tifrunner.gnm1.ann1.VIU61J.1	36	T	MOB kinase activator-like 1B [Arachis ipaensis]		arahy.Tifrunner.gnm1.ann1.11NJV3.3	186	S	gastric triacylglycerol lipase-like [Arachis ipaensis]		arahy.Tifrunner.gnm1.ann1.1NC23U.1	midasin-like [Glycine max]
arahy.Tifrunner.gnm1.ann1.VH54GQ.2	16	S	coiled-coil domain-containing protein SCD2-like isoform X3 [Arachis ipaensis]		arahy.Tifrunner.gnm1.ann1.E495RS.2	68	S	CDPK-related kinase 5 [Arachis ipaensis]		arahy.Tifrunner.gnm1.ann1.132VH2	89	S	"phosphatidylinositol 3,4,5-trisphosphate 3-phosphatase and protein-tyrosine-phosphatase PTEN2A-like[Arachis ipaensis]"		arahy.Tifrunner.gnm1.ann1.1P4EVJ.1	protein FAR1-RELATED SEQUENCE 5-like [Arachis duranensis]
arahy.Tifrunner.gnm1.ann1.SPQ4E9.4	33	S	calcium-dependent protein kinase 26 [Arachis ipaensis]		arahy.Tifrunner.gnm1.ann1.QV8INP.1	193	S	2-keto-3-deoxy-L-rhamnonate aldolase-like [Arachis duranensis]		arahy.Tifrunner.gnm1.ann1.132VH2	143	S	"phosphatidylinositol 3,4,5-trisphosphate 3-phosphatase and protein-tyrosine-phosphatase PTEN2A-like[Arachis ipaensis]"		arahy.Tifrunner.gnm1.ann1.1PUV9L.1	protein JASON-like isoform X1 [Arachis ipaensis]
arahy.Tifrunner.gnm1.ann1.TN3NK4.4	265	S	PRLI-interacting factor A [Medicago truncatula]		arahy.Tifrunner.gnm1.ann1.581AXD.3	468	S	serine/threonine-protein phosphatase 6 regulatory subunit 3 isoform X2 [Arachis duranensis]		arahy.Tifrunner.gnm1.ann1.132VH2	510	S	"phosphatidylinositol 3,4,5-trisphosphate 3-phosphatase and protein-tyrosine-phosphatase PTEN2A-like[Arachis ipaensis]"		arahy.Tifrunner.gnm1.ann1.1R75EY.1	ninja-family protein AFP3 [Arachis duranensis]
arahy.Tifrunner.gnm1.ann1.N9AH7W.1	259	T	DEAD-box ATP-dependent RNA helicase 38-like [Arachis duranensis]		arahy.Tifrunner.gnm1.ann1.4Y3JNF.1	175	S	cytoplasmic membrane protein [Medicago truncatula]		arahy.Tifrunner.gnm1.ann1.132VH2	517	S	"phosphatidylinositol 3,4,5-trisphosphate 3-phosphatase and protein-tyrosine-phosphatase PTEN2A-like[Arachis ipaensis]"		arahy.Tifrunner.gnm1.ann1.1SB5R1.1	ubiquitin carboxyl-terminal hydrolase 2 [Arachis duranensis]
arahy.Tifrunner.gnm1.ann1.K23Z11.1	30	S	transcription factor VIP1 [Arachis duranensis]		arahy.Tifrunner.gnm1.ann1.TM4GPH.1	431	S	transmembrane protein [Arabidopsis thaliana]		arahy.Tifrunner.gnm1.ann1.13DKA1	545	S	trypsin family protein [Medicago truncatula]		arahy.Tifrunner.gnm1.ann1.1SB772.3	sterol 3-beta-glucosyltransferase UGT80B1 [Arachis ipaensis]
arahy.Tifrunner.gnm1.ann1.AE9G4B.2	70	T	dystrophia myotonica WD repeat-containing protein-like [Arachis ipaensis]		arahy.Tifrunner.gnm1.ann1.L8ZXQA.1	605	S	serine/arginine repetitive matrix protein 1 [Arachis duranensis]		arahy.Tifrunner.gnm1.ann1.14AZR1	96	S	phytolongin Phyl1.1 [Arachis ipaensis]		arahy.Tifrunner.gnm1.ann1.1SN7TU.2	probable aquaporin PIP-type 7a [Arachis duranensis]
arahy.Tifrunner.gnm1.ann1.Z4J9LG.1	11	S	exocyst complex component EXO84B [Arachis duranensis]		arahy.Tifrunner.gnm1.ann1.X6L8L6.1	644	S	ethylene response sensor 1 [Arachis ipaensis]		arahy.Tifrunner.gnm1.ann1.14AZR1	186	S	phytolongin Phyl1.1 [Arachis ipaensis]		arahy.Tifrunner.gnm1.ann1.1T1RVQ.1	putative HVA22-like protein g isoform X2 [Arachis duranensis]
arahy.Tifrunner.gnm1.ann1.IV9MYI.1	390	S	cyclin-dependent kinase D-3-like [Arachis ipaensis]		arahy.Tifrunner.gnm1.ann1.LLLD9E.1	183	S	PH-response transcription factor [Arabidopsis thaliana]		arahy.Tifrunner.gnm1.ann1.159H25.2	170	S	aldehyde dehydrogenase family 7 member A1 [Arachis duranensis]		arahy.Tifrunner.gnm1.ann1.1TT2GW.1	dynamin-2B-like [Arachis ipaensis]
arahy.Tifrunner.gnm1.ann1.RP0H42.2	201	S	RPM1-interacting protein 4-like [Arachis duranensis]		arahy.Tifrunner.gnm1.ann1.TI92NW.1	523	S	protein IQ-DOMAIN 1 isoform X1 [Arachis duranensis]		arahy.Tifrunner.gnm1.ann1.15A7A2	41	S	probable GMP synthase [glutamine-hydrolyzing] [Glycine max]		arahy.Tifrunner.gnm1.ann1.1TT2GW.3	dynamin-2B-like [Arachis duranensis]
arahy.Tifrunner.gnm1.ann1.USYB3W.1	10	T	UDP-glucuronate 4-epimerase 3-like [Arachis duranensis]		arahy.Tifrunner.gnm1.ann1.R3C42M.2	90	S	"superoxide dismutase [Mn], mitochondrial-like [Arachis duranensis]"		arahy.Tifrunner.gnm1.ann1.15A7A2	71	S	probable GMP synthase [glutamine-hydrolyzing] [Glycine max]		arahy.Tifrunner.gnm1.ann1.1U7IT4.1	J domain-containing protein required for chloroplast accumulation response 1 [Arachis duranensis]
arahy.Tifrunner.gnm1.ann1.MKFK5S.1	183	S	ras-related protein RABD1-like [Arachis ipaensis]		arahy.Tifrunner.gnm1.ann1.EU6ASS.1	86	S	plant UBX domain-containing protein 9-like [Arachis ipaensis]		arahy.Tifrunner.gnm1.ann1.15IZES.1	115	S	myb-like protein H isoform X1 [Populus euphratica]		arahy.Tifrunner.gnm1.ann1.1V1Y36.2	CCR4-NOT transcription complex subunit 1 isoform X2 [Arachis ipaensis]
arahy.Tifrunner.gnm1.ann1.GA8N54.1	127	S	formin-like protein 14 isoform X1 [Arachis ipaensis]		arahy.Tifrunner.gnm1.ann1.XW46IK.1	109	S	TPR repeat-containing thioredoxin TTL1-like [Vigna radiata var. radiata]		arahy.Tifrunner.gnm1.ann1.15IZES.1	157	S	myb-like protein H isoform X1 [Populus euphratica]		arahy.Tifrunner.gnm1.ann1.1V29TX.1	transcription initiation factor TFIID subunit 10 [Arachis ipaensis]
arahy.Tifrunner.gnm1.ann1.MNY5KW.1	209	T	coatomer subunit delta [Arachis ipaensis]		arahy.Tifrunner.gnm1.ann1.U0AKQE.1	20	T	conserved oligomeric Golgi complex subunit 1 [Arachis duranensis]		arahy.Tifrunner.gnm1.ann1.16AZTT.1	311	S	autophagy-related protein 18c-like [Arachis duranensis]		arahy.Tifrunner.gnm1.ann1.1VDT9U.1	KH domain-containing protein At2g38610-like isoform X2 [Arachis duranensis]
arahy.Tifrunner.gnm1.ann1.GBN5SF.2	714	S	serine/arginine repetitive matrix protein 2-like isoform X2 [Arachis ipaensis]		arahy.Tifrunner.gnm1.ann1.D1K6PT.1	494	T	formin-like protein 5 [Arachis ipaensis]		arahy.Tifrunner.gnm1.ann1.16GZH2.1	53	S	lysine-rich arabinogalactan protein 19-like [Arachis duranensis]		arahy.Tifrunner.gnm1.ann1.1VDT9U.2	KH domain-containing protein At2g38610-like isoform X2 [Arachis duranensis]
arahy.Tifrunner.gnm1.ann1.N6J268.1	14	S	nucleobase-ascorbate transporter 12 isoform X1 [Arachis duranensis]		arahy.Tifrunner.gnm1.ann1.J65KEH.1	205	S	serine/arginine-rich SC35-like splicing factor SCL30 [Arachis ipaensis]		arahy.Tifrunner.gnm1.ann1.16GZH2.1	83	S	lysine-rich arabinogalactan protein 19-like [Arachis duranensis]		arahy.Tifrunner.gnm1.ann1.1VR9T8.1	calcium permeable stress-gated cation channel 1-like [Arachis ipaensis]
arahy.Tifrunner.gnm1.ann1.6NG7WF.1	179	S	protein WVD2-like 5 [Arachis ipaensis]		arahy.Tifrunner.gnm1.ann1.1G1J9V.1	155	S	dormancy-associated protein homolog 3-like isoform X2 [Cajanus cajan]		arahy.Tifrunner.gnm1.ann1.16GZH2.1	98	S	lysine-rich arabinogalactan protein 19-like [Arachis duranensis]		arahy.Tifrunner.gnm1.ann1.1VS4ZL.2	zonadhesin-like [Arachis ipaensis]
arahy.Tifrunner.gnm1.ann1.87PYFW.1	117	S	plastid movement impaired protein [Medicago truncatula]		arahy.Tifrunner.gnm1.ann1.YTB47M.1	50	S	protein PHYTOCHROME KINASE SUBSTRATE 1-like [Arachis ipaensis]		arahy.Tifrunner.gnm1.ann1.16GZH2.1	110	S	lysine-rich arabinogalactan protein 19-like [Arachis duranensis]		arahy.Tifrunner.gnm1.ann1.1W2EAK.1	protein RESTRICTED TEV MOVEMENT 2-like [Arachis duranensis]
arahy.Tifrunner.gnm1.ann1.RA272M.1	366	S			arahy.Tifrunner.gnm1.ann1.V72G13.2	370	S	aluminum-activated malate transporter 9-like isoform X2 [Arachis duranensis]		arahy.Tifrunner.gnm1.ann1.16GZH2.1	114	S	lysine-rich arabinogalactan protein 19-like [Arachis duranensis]		arahy.Tifrunner.gnm1.ann1.1Y45Q7.1	protein DETOXIFICATION 42-like [Arachis ipaensis]
arahy.Tifrunner.gnm1.ann1.00VL53.1	321	S	probable inactive receptor kinase At2g26730 [Arachis ipaensis]		arahy.Tifrunner.gnm1.ann1.E5GBGH.1	81	S	serine/threonine-protein kinase GRIK2-like [Arachis duranensis]		arahy.Tifrunner.gnm1.ann1.16GZH2.1	124	S	lysine-rich arabinogalactan protein 19-like [Arachis duranensis]		arahy.Tifrunner.gnm1.ann1.1YL9TV.1	dr1-associated corepressor homolog [Arachis duranensis]
arahy.Tifrunner.gnm1.ann1.TQX8J8.1	206	T	E3 ubiquitin-protein ligase At1g63170 [Arachis duranensis]		arahy.Tifrunner.gnm1.ann1.FT1LK2.1	14	S	epsin-3-like [Arachis ipaensis]		arahy.Tifrunner.gnm1.ann1.16GZH2.1	129	S	lysine-rich arabinogalactan protein 19-like [Arachis duranensis]		arahy.Tifrunner.gnm1.ann1.1Z0BUP.1
arahy.Tifrunner.gnm1.ann1.M21JET.2	194	S	dr1-associated corepressor homolog [Arachis ipaensis]		arahy.Tifrunner.gnm1.ann1.AUQB01.1	349	S	latex abundant protein 1 [Populus trichocarpa]		arahy.Tifrunner.gnm1.ann1.16GZH2.1	139	S	lysine-rich arabinogalactan protein 19-like [Arachis duranensis]		arahy.Tifrunner.gnm1.ann1.1Z9FJQ.2	protein N-lysine methyltransferase METTL21A [Arachis ipaensis]
arahy.Tifrunner.gnm1.ann1.N8S0IJ.3	147	S	chromatin structure-remodeling complex protein SYD-like isoform X1 [Arachis duranensis]		arahy.Tifrunner.gnm1.ann1.88CVAX.1	1114	S	topless-related protein 3 [Arachis duranensis]		arahy.Tifrunner.gnm1.ann1.16GZH2.1	143	S	lysine-rich arabinogalactan protein 19-like [Arachis duranensis]		arahy.Tifrunner.gnm1.ann1.1ZJY2Z.2	probable leucine-rich repeat receptor-like protein kinase At5g49770 [Arachis ipaensis]
arahy.Tifrunner.gnm1.ann1.G68EH0.2	1256	S	protein TSS isoform X2 [Arachis ipaensis]		arahy.Tifrunner.gnm1.ann1.Y5C6DK.1	379	S	serine/threonine-protein kinase UCNL-like [Arachis ipaensis]		arahy.Tifrunner.gnm1.ann1.16GZH2.1	271	S	lysine-rich arabinogalactan protein 19-like [Arachis duranensis]		arahy.Tifrunner.gnm1.ann1.201XHT.4	flippase kinase 1 [Arachis ipaensis]
arahy.Tifrunner.gnm1.ann1.IC24VR.1	1441	S	uncharacterized LOC100274068 [Zea mays]		arahy.Tifrunner.gnm1.ann1.L8ZXQA.1	463	S	serine/arginine repetitive matrix protein 1 [Arachis duranensis]		arahy.Tifrunner.gnm1.ann1.16GZH2.1	273	S	lysine-rich arabinogalactan protein 19-like [Arachis duranensis]		arahy.Tifrunner.gnm1.ann1.2022SK.2	protein transport protein SEC23 [Arachis ipaensis]
arahy.Tifrunner.gnm1.ann1.X1IMZB.1	405	T	synaptotagmin-2-like [Arachis ipaensis]		arahy.Tifrunner.gnm1.ann1.ZE7QP6.1	49	T	protein IQ-DOMAIN 14 isoform X1 [Arachis duranensis]		arahy.Tifrunner.gnm1.ann1.173QH1	48	S	1-aminocyclopropane-1-carboxylate oxidase homolog 1-like [Arachis ipaensis]		arahy.Tifrunner.gnm1.ann1.203Q7N.1	LOW QUALITY PROTEIN: ABSCISIC ACID-INSENSITIVE 5-like protein 2 [Arachis ipaensis]
arahy.Tifrunner.gnm1.ann1.ZE8HJS.1	54	T	RNA-binding protein 8A-B [Arachis ipaensis]		arahy.Tifrunner.gnm1.ann1.TVN6NC.1	238	S	serine/arginine-rich splicing factor RS41-like isoform X1 [Cajanus cajan]		arahy.Tifrunner.gnm1.ann1.17PB5S.1	218	S	LOW QUALITY PROTEIN: ankyrin-3-like [Arachis ipaensis]		arahy.Tifrunner.gnm1.ann1.207GSN.2	ABSCISIC ACID-INSENSITIVE 5-like protein 2 isoform X3 [Arachis duranensis]
arahy.Tifrunner.gnm1.ann1.59HWIF.1	130	S	probable proteasome inhibitor isoform X1 [Arachis ipaensis]		arahy.Tifrunner.gnm1.ann1.0CQZ6Z.1	1411	T	pentatricopeptide repeat-containing protein At1g19720 [Arachis duranensis]		arahy.Tifrunner.gnm1.ann1.180UY1	292	S	translation initiation factor IF-2-like [Arachis ipaensis]		arahy.Tifrunner.gnm1.ann1.21Z9D1	ABC1 family protein [Arabidopsis lyrata subsp. lyrata]
arahy.Tifrunner.gnm1.ann1.UGP4RB.1	428	S	CDPK-related kinase 7-like [Arachis ipaensis]		arahy.Tifrunner.gnm1.ann1.1SB5R1.1	22	S	ubiquitin carboxyl-terminal hydrolase 2 [Arachis duranensis]		arahy.Tifrunner.gnm1.ann1.180UY1	344	S	translation initiation factor IF-2-like [Arachis ipaensis]		arahy.Tifrunner.gnm1.ann1.22A3IK.1	"transmembrane protein, putative (DUF679) [Arabidopsis thaliana]"
arahy.Tifrunner.gnm1.ann1.99PJJG.1	100	S	probable transcription factor PosF21 [Arachis ipaensis]		arahy.Tifrunner.gnm1.ann1.D6D033.1	406	S	serine/arginine repetitive matrix protein 2 [Arachis duranensis]		arahy.Tifrunner.gnm1.ann1.185U53	188	S	ras-related protein RABE1a [Arachis ipaensis]		arahy.Tifrunner.gnm1.ann1.22FU97.1	transcription factor TCP8 [Arachis ipaensis]
arahy.Tifrunner.gnm1.ann1.07091Z.1	413	S	"mono/di-acylglycerol lipase, amino-terminal [Medicago truncatula]"		arahy.Tifrunner.gnm1.ann1.AUQB01.1	137	S	latex abundant protein 1 [Populus trichocarpa]		arahy.Tifrunner.gnm1.ann1.185U53	202	S	ras-related protein RABE1a [Arachis ipaensis]		arahy.Tifrunner.gnm1.ann1.22L7F1	"psbP domain-containing protein 5, chloroplastic [Arachis duranensis]"
arahy.Tifrunner.gnm1.ann1.11BQ2X.4	207	S	serine/arginine-rich splicing factor RS31-like isoform X1 [Arachis ipaensis]		arahy.Tifrunner.gnm1.ann1.YL3Z6V.1	195	S	"glyceraldehyde-3-phosphate dehydrogenase GAPC2, cytosolic [Arachis duranensis]"		arahy.Tifrunner.gnm1.ann1.18AW2L.2	977	S	protein transport protein SEC31 homolog B [Arachis duranensis]		arahy.Tifrunner.gnm1.ann1.22LF01	protein FLX-like 3 [Arachis ipaensis]
arahy.Tifrunner.gnm1.ann1.TQ6BSY.1	194	S	tobamovirus multiplication protein 2A-like [Arachis duranensis]		arahy.Tifrunner.gnm1.ann1.LPXF14.1	59	S	glutamine synthetase nodule isozyme [Arachis ipaensis]		arahy.Tifrunner.gnm1.ann1.18DP1Z.1	18	S	late embryogenesis abundant protein [Medicago truncatula]		arahy.Tifrunner.gnm1.ann1.22W300.3	protein RCC2 homolog [Arachis ipaensis]
arahy.Tifrunner.gnm1.ann1.FMX4TW.2	155	S	protein EI24 homolog [Arachis ipaensis]		arahy.Tifrunner.gnm1.ann1.S5T91D.2	181	S	uncharacterized membrane protein At1g16860-like [Arachis ipaensis]		arahy.Tifrunner.gnm1.ann1.18DP1Z.1	22	S	late embryogenesis abundant protein [Medicago truncatula]		arahy.Tifrunner.gnm1.ann1.230XUM.2	heterogeneous nuclear ribonucleoprotein 1-like [Arachis ipaensis]
arahy.Tifrunner.gnm1.ann1.86R49N.1	3	S	D-xylose-proton symporter-like 2 isoform X1 [Arachis duranensis]		arahy.Tifrunner.gnm1.ann1.T2JUVA.1	691	S	probable protein S-acyltransferase 19 isoform X1 [Arachis duranensis]		arahy.Tifrunner.gnm1.ann1.18DP1Z.1	33	S	late embryogenesis abundant protein [Medicago truncatula]		arahy.Tifrunner.gnm1.ann1.232HH1	alkylated DNA repair protein alkB homolog 8 [Arachis ipaensis]
arahy.Tifrunner.gnm1.ann1.9UJZ67.1	510	S	sorting nexin carboxy-terminal protein [Medicago truncatula]		arahy.Tifrunner.gnm1.ann1.949BMZ.1	568	S	zinc ion-binding protein [Medicago truncatula]		arahy.Tifrunner.gnm1.ann1.18FPP0.1	283	S	meiosis chromosome segregation family protein [Medicago truncatula]		arahy.Tifrunner.gnm1.ann1.238B61	cell wall protein DAN4-like [Arachis duranensis]
arahy.Tifrunner.gnm1.ann1.QI6NWI.1	88	S	plastid movement impaired protein [Medicago truncatula]		arahy.Tifrunner.gnm1.ann1.04JW1L.2	156	S	mitogen-activated protein kinase kinase kinase YODA-like isoform X3 [Arachis duranensis]		arahy.Tifrunner.gnm1.ann1.18FPP0.1	397	S	meiosis chromosome segregation family protein [Medicago truncatula]		arahy.Tifrunner.gnm1.ann1.23EZU0.1	hydroxyproline-rich glycoprotein family protein [Medicago truncatula]
arahy.Tifrunner.gnm1.ann1.D1K6PT.1	646	S	formin-like protein 5 [Arachis ipaensis]		arahy.Tifrunner.gnm1.ann1.XDTP3U.1	63	S	protein JASON isoform X1 [Arachis duranensis]		arahy.Tifrunner.gnm1.ann1.18SBF2	363	S	zinc finger CCCH domain-containing protein 18-like [Arachis duranensis]		arahy.Tifrunner.gnm1.ann1.23PF6N.2	"serine hydroxymethyltransferase, mitochondrial [Arachis duranensis]"
arahy.Tifrunner.gnm1.ann1.Q9AYUR.1	456	S	sodium/hydrogen exchanger 1-like [Arachis ipaensis]		arahy.Tifrunner.gnm1.ann1.XKSF6X.1	976	S	RNA-binding (RRM/RBD/RNP motif) family protein [Medicago truncatula]		arahy.Tifrunner.gnm1.ann1.18SBF2	397	S	zinc finger CCCH domain-containing protein 18-like [Arachis duranensis]		arahy.Tifrunner.gnm1.ann1.23ZYRY.3	"calcium-transporting ATPase 9, plasma membrane-type-like [Arachis duranensis]"
arahy.Tifrunner.gnm1.ann1.YB5EX7.1	2	T	ubiquitin-conjugating enzyme E2 variant 1C [Arachis ipaensis]		arahy.Tifrunner.gnm1.ann1.MEE04S.1	748	S	"aconitate hydratase, cytoplasmic [Arachis ipaensis]"		arahy.Tifrunner.gnm1.ann1.18SBF2	603	S	zinc finger CCCH domain-containing protein 18-like [Arachis duranensis]		arahy.Tifrunner.gnm1.ann1.24ECRJ.2	probable alkaline/neutral invertase D [Arachis ipaensis]
arahy.Tifrunner.gnm1.ann1.P8DCPE.1	107	S	RPM1-interacting protein 4-like isoform X2 [Arachis duranensis]		arahy.Tifrunner.gnm1.ann1.HCVK6G.4	161	S	aldo-keto reductase family 4 member C9-like [Arachis duranensis]		arahy.Tifrunner.gnm1.ann1.18SBF2	638	S	zinc finger CCCH domain-containing protein 18-like [Arachis duranensis]		arahy.Tifrunner.gnm1.ann1.24PQDM.2	probable protein phosphatase 2C 22 [Arachis duranensis]
arahy.Tifrunner.gnm1.ann1.RL39CN.1	69	T			arahy.Tifrunner.gnm1.ann1.N1U5TX.5	114	S	josephin-like protein [Vigna angularis]		arahy.Tifrunner.gnm1.ann1.18SBF2	642	S	zinc finger CCCH domain-containing protein 18-like [Arachis duranensis]		arahy.Tifrunner.gnm1.ann1.24XUJ9.1	plant intracellular Ras-group-related LRR protein 5-like [Arachis duranensis]
arahy.Tifrunner.gnm1.ann1.G8RZTB.1	393	S	mucin-5AC-like [Arachis ipaensis]		arahy.Tifrunner.gnm1.ann1.GKEN9S.1	339	S	acyl-CoA-binding domain-containing protein 4 [Lupinus angustifolius]		arahy.Tifrunner.gnm1.ann1.18SBF2	705	S	zinc finger CCCH domain-containing protein 18-like [Arachis duranensis]		arahy.Tifrunner.gnm1.ann1.24ZDA8.2	ankyrin repeat domain-containing protein 2B-like [Arachis ipaensis]
arahy.Tifrunner.gnm1.ann1.JLHH9C.1	99	S	respiratory burst oxidase homolog protein C [Arachis duranensis]		arahy.Tifrunner.gnm1.ann1.X0V096.2	69	S	extra-large guanine nucleotide-binding protein 3 [Arachis duranensis]		arahy.Tifrunner.gnm1.ann1.18SBF3	383	S	zinc finger CCCH domain-containing protein 18-like [Arachis duranensis]		arahy.Tifrunner.gnm1.ann1.25IG2V.1	rho GTPase-activating protein gacF-like [Arachis duranensis]
arahy.Tifrunner.gnm1.ann1.C0JSMI.1	229	S	GATA zinc finger domain-containing protein 10 [Ipomoea nil]		arahy.Tifrunner.gnm1.ann1.YX753W.1	492	S	colon cancer-associated Mic1-like protein [Medicago truncatula]		arahy.Tifrunner.gnm1.ann1.18SBF3	623	S	zinc finger CCCH domain-containing protein 18-like [Arachis duranensis]		arahy.Tifrunner.gnm1.ann1.26IAC2.1	protein NRT1/ PTR FAMILY 2.8-like [Arachis duranensis]
arahy.Tifrunner.gnm1.ann1.70Y970.1	183	S	ras-related protein RABA2a [Arachis ipaensis]		arahy.Tifrunner.gnm1.ann1.7WD3SA.2	79	S	serine/arginine-rich splicing factor SR45 [Arachis duranensis]		arahy.Tifrunner.gnm1.ann1.18SBF3	693	S	zinc finger CCCH domain-containing protein 18-like [Arachis duranensis]		arahy.Tifrunner.gnm1.ann1.26R1C1	lysine-specific histone demethylase 1 homolog 3 [Arachis ipaensis]
arahy.Tifrunner.gnm1.ann1.T2XHT6.1	28	S	AT-hook motif nuclear-localized protein 5-like [Arachis duranensis]		arahy.Tifrunner.gnm1.ann1.790TYF.1	801	S	probable LRR receptor-like serine/threonine-protein kinase At1g06840 [Arachis ipaensis]		arahy.Tifrunner.gnm1.ann1.1B7IGJ.1	91	S	probable WRKY transcription factor 47 [Arachis ipaensis]		arahy.Tifrunner.gnm1.ann1.26W001	putative RNA-binding protein Luc7-like 2 [Arachis duranensis]
arahy.Tifrunner.gnm1.ann1.HG7TPY.1	47	S	CASP-like protein 4A3 [Arachis duranensis]		arahy.Tifrunner.gnm1.ann1.61N80Q.1	944	T	SART-1 family protein DOT2 [Arachis ipaensis]		arahy.Tifrunner.gnm1.ann1.1B7IGJ.1	93	S	probable WRKY transcription factor 47 [Arachis ipaensis]		arahy.Tifrunner.gnm1.ann1.27GD0X.4	transcription initiation factor TFIID subunit 4b-like isoform X4 [Arachis ipaensis]
arahy.Tifrunner.gnm1.ann1.HU64YQ.2	333	S	flowering time control protein FPA [Arachis ipaensis]		arahy.Tifrunner.gnm1.ann1.RP0H42.2	160	S	RPM1-interacting protein 4-like [Arachis duranensis]		arahy.Tifrunner.gnm1.ann1.1BJ025.1	147	S	protein enabled [Arachis duranensis]		arahy.Tifrunner.gnm1.ann1.27HM21	"transcriptional regulator of RNA polII, SAGA, subunit [Medicago truncatula]"
arahy.Tifrunner.gnm1.ann1.MQM99M.1	107	S	protein DEK-like isoform X2 [Arachis ipaensis]		arahy.Tifrunner.gnm1.ann1.6K20QR.1	197	S	chaperone DnaJ-domain protein [Medicago truncatula]		arahy.Tifrunner.gnm1.ann1.1D0QNK.1	412	S	UPF0400 protein C337.03 [Arachis duranensis]		arahy.Tifrunner.gnm1.ann1.27IQR1.1	plant/F20M13-60 protein [Medicago truncatula]
arahy.Tifrunner.gnm1.ann1.QI6NWI.1	110	S	plastid movement impaired protein [Medicago truncatula]		arahy.Tifrunner.gnm1.ann1.T43K8I.3	376	S	serine/threonine-protein phosphatase BSL1 [Arachis ipaensis]		arahy.Tifrunner.gnm1.ann1.1E00SW.2	38	S	polyadenylate-binding protein-interacting protein 7-like [Arachis ipaensis]		arahy.Tifrunner.gnm1.ann1.2C8XNL.1	protein phosphatase 2C 29-like isoform X1 [Arachis duranensis]
arahy.Tifrunner.gnm1.ann1.CH6KF4.1	20	S	probable protein phosphatase 2C 35 isoform X1 [Arachis ipaensis]		arahy.Tifrunner.gnm1.ann1.M4GMJK.1	108	S	RNA-binding protein 34 [Arachis duranensis]		arahy.Tifrunner.gnm1.ann1.1E00SW.2	74	S	polyadenylate-binding protein-interacting protein 7-like [Arachis ipaensis]		arahy.Tifrunner.gnm1.ann1.2DJ75K.2	probable protein phosphatase 2C 52 [Arachis ipaensis]
arahy.Tifrunner.gnm1.ann1.YK7683.1	653	S	agenet domain protein [Medicago truncatula]		arahy.Tifrunner.gnm1.ann1.YHR4LX.1	617	S	"protein indeterminate-domain 4, chloroplastic-like [Arachis ipaensis]"		arahy.Tifrunner.gnm1.ann1.1E00SW.2	351	S	polyadenylate-binding protein-interacting protein 7-like [Arachis ipaensis]		arahy.Tifrunner.gnm1.ann1.2ED4HK.1	uncharacterized membrane protein At3g27390-like isoform X1 [Arachis ipaensis]
arahy.Tifrunner.gnm1.ann1.S47DRU.1	162	S	UPF0396 protein [Arachis ipaensis]		arahy.Tifrunner.gnm1.ann1.IB22WA.1	152	T	cell number regulator 2-like [Arachis ipaensis]		arahy.Tifrunner.gnm1.ann1.1EDB5Y.1	547	S	centrosomal protein of 164 kDa isoform X3 [Arachis ipaensis]		arahy.Tifrunner.gnm1.ann1.2ETJ11	"protein kinase 2B, chloroplastic-like isoform X2 [Arachis ipaensis]"
arahy.Tifrunner.gnm1.ann1.415NE5.1	780	S	exocyst complex component SEC15B [Arachis ipaensis]		arahy.Tifrunner.gnm1.ann1.J916II.1	72	S	protein SAD1/UNC-84 domain protein 1-like [Arachis duranensis]		arahy.Tifrunner.gnm1.ann1.1EDB5Y.1	728	S	centrosomal protein of 164 kDa isoform X3 [Arachis ipaensis]		arahy.Tifrunner.gnm1.ann1.2FK0GQ.2	nucleotidyltransferase [Medicago truncatula]
arahy.Tifrunner.gnm1.ann1.L3AKFM.1	95	T	lysine histidine transporter-like 8 [Arachis duranensis]		arahy.Tifrunner.gnm1.ann1.B3C57W.3	94	S	autophagy-related protein 13a-like isoform X2 [Arachis ipaensis]		arahy.Tifrunner.gnm1.ann1.1EDB5Y.1	753	S	centrosomal protein of 164 kDa isoform X3 [Arachis ipaensis]		arahy.Tifrunner.gnm1.ann1.2FUK2Z.2	uncharacterized membrane protein At3g27390-like isoform X1 [Arachis ipaensis]
arahy.Tifrunner.gnm1.ann1.3B9L35.1	42	S	"transmembrane protein, putative [Medicago truncatula]"		arahy.Tifrunner.gnm1.ann1.RKT4NC.2	504	S	serine/threonine-protein kinase BLUS1-like [Arachis duranensis]		arahy.Tifrunner.gnm1.ann1.1EDB5Y.1	872	S	centrosomal protein of 164 kDa isoform X3 [Arachis ipaensis]		arahy.Tifrunner.gnm1.ann1.2H5V01	ultraviolet-B receptor UVR8-like [Arachis ipaensis]
arahy.Tifrunner.gnm1.ann1.M0PR6E.1	15	S	random slug protein 5-like [Arachis ipaensis]		arahy.Tifrunner.gnm1.ann1.YQJ5CI.1	258	S	binding partner of ACD11 1-like [Arachis duranensis]		arahy.Tifrunner.gnm1.ann1.1EJ222.1	55	S	lysine-rich arabinogalactan protein 19-like [Arachis duranensis]		arahy.Tifrunner.gnm1.ann1.2H77W4.1	ethylene receptor 2 [Arachis ipaensis]
arahy.Tifrunner.gnm1.ann1.KA850A.1	29	S	transcription factor bHLH128-like [Arachis ipaensis]		arahy.Tifrunner.gnm1.ann1.VSCY1A.2	158	S	lysine-specific histone demethylase 1 homolog 3 [Arachis ipaensis]		arahy.Tifrunner.gnm1.ann1.1EJ222.1	126	S	lysine-rich arabinogalactan protein 19-like [Arachis duranensis]		arahy.Tifrunner.gnm1.ann1.2JSS8R.1	FK506-binding protein 5 [Ricinus communis]
arahy.Tifrunner.gnm1.ann1.GWIQ86.1	188	S	probable mediator of RNA polymerase II transcription subunit 26c [Arachis ipaensis]		arahy.Tifrunner.gnm1.ann1.EQL16Q.2	89	S	light-inducible protein CPRF2-like [Arachis duranensis]		arahy.Tifrunner.gnm1.ann1.1EJ222.1	131	S	lysine-rich arabinogalactan protein 19-like [Arachis duranensis]		arahy.Tifrunner.gnm1.ann1.2KUM51	transcription initiation factor TFIID subunit 8-like [Arachis ipaensis]
arahy.Tifrunner.gnm1.ann1.NEJ4KC.2	380	T	probable transcription factor PosF21 [Arachis ipaensis]		arahy.Tifrunner.gnm1.ann1.J916II.1	88	S	protein SAD1/UNC-84 domain protein 1-like [Arachis duranensis]		arahy.Tifrunner.gnm1.ann1.1EL8LN.2	62	S	plant/T7H20-70 protein [Medicago truncatula]		arahy.Tifrunner.gnm1.ann1.2L5X7N.3	cyclin-dependent kinase G-2 [Arachis ipaensis]
arahy.Tifrunner.gnm1.ann1.LTHX1H.2	281	S	outer arm dynein light chain 1 [Medicago truncatula]		arahy.Tifrunner.gnm1.ann1.V66673.1	15	S	probable serine/threonine-protein kinase NAK [Arachis duranensis]		arahy.Tifrunner.gnm1.ann1.1F18R3.2	363	S	probable magnesium transporter NIPA8 [Arachis ipaensis]		arahy.Tifrunner.gnm1.ann1.2L9WS1	heat shock cognate 70 kDa protein 2 [Arachis ipaensis]
arahy.Tifrunner.gnm1.ann1.A42YA2.1	509	S	"RING/FYVE/PHD zinc finger protein, putative [Medicago truncatula]"		arahy.Tifrunner.gnm1.ann1.A7Q2QI.2	559	S	proteinaceous RNase P 2 [Arachis ipaensis]		arahy.Tifrunner.gnm1.ann1.1FV09I.1	825	S	epidermal growth factor receptor substrate 15-like 1 isoform X1 [Arachis duranensis]		arahy.Tifrunner.gnm1.ann1.2M8W81	intracellular protein transporter USO1-like protein [Medicago truncatula]
arahy.Tifrunner.gnm1.ann1.QFH4DU.1	336	S	flocculation protein FLO11 [Arachis duranensis]		arahy.Tifrunner.gnm1.ann1.N2WGA3.2	13	S	"protein kinase APK1A, chloroplastic-like isoform X2 [Arachis duranensis]"		arahy.Tifrunner.gnm1.ann1.1FV09I.1	829	S	epidermal growth factor receptor substrate 15-like 1 isoform X1 [Arachis duranensis]		arahy.Tifrunner.gnm1.ann1.2MH902	50S ribosomal protein L17-like [Arachis ipaensis]
arahy.Tifrunner.gnm1.ann1.JBBQ4L.1	77	S	methyltransferase-like protein 1 [Arachis ipaensis]		arahy.Tifrunner.gnm1.ann1.XT6BWY.1	533	S	probable inactive leucine-rich repeat receptor-like protein kinase At1g66830 [Arachis duranensis]		arahy.Tifrunner.gnm1.ann1.1FV09I.1	940	S	epidermal growth factor receptor substrate 15-like 1 isoform X1 [Arachis duranensis]		arahy.Tifrunner.gnm1.ann1.2MP0U5.3	mitogen-activated protein kinase 9-like [Arachis duranensis]
arahy.Tifrunner.gnm1.ann1.ICWX02.2	143	S	FHA domain-containing protein DDL [Arachis ipaensis]		arahy.Tifrunner.gnm1.ann1.1TT2GW.1	873	S	dynamin-2B-like [Arachis ipaensis]		arahy.Tifrunner.gnm1.ann1.1G1J9V.1	88	S	dormancy-associated protein homolog 3-like isoform X2 [Cajanus cajan]		arahy.Tifrunner.gnm1.ann1.2N4ZV5.1	"aspartate aminotransferase, mitochondrial [Arachis ipaensis]"
arahy.Tifrunner.gnm1.ann1.6KP4CV.1	28	S	calcium-dependent protein kinase 2-like [Arachis duranensis]		arahy.Tifrunner.gnm1.ann1.RY2Y1Z.1	61	T	auxin-repressed 12.5 kDa protein-like [Arachis ipaensis]		arahy.Tifrunner.gnm1.ann1.1G1J9V.1	155	S	dormancy-associated protein homolog 3-like isoform X2 [Cajanus cajan]		arahy.Tifrunner.gnm1.ann1.2PBN0R.1	protein MPE1-like isoform X1 [Arachis duranensis]
arahy.Tifrunner.gnm1.ann1.THB5XW.2	79	S	growth regulator-like protein [Medicago truncatula]		arahy.Tifrunner.gnm1.ann1.VH54GQ.2	16	S	coiled-coil domain-containing protein SCD2-like isoform X3 [Arachis ipaensis]		arahy.Tifrunner.gnm1.ann1.1GCN3K.1	52	S			arahy.Tifrunner.gnm1.ann1.2PR50U.2	filament-like plant protein 4 [Arachis duranensis]
arahy.Tifrunner.gnm1.ann1.R50JGG.1	187	S	O-fucosyltransferase family protein [Arabidopsis thaliana]		arahy.Tifrunner.gnm1.ann1.8SQ1RZ.1	162	S	copper methylamine oxidase-like [Arachis duranensis]		arahy.Tifrunner.gnm1.ann1.1H9ESI.1	34	S	outer envelope membrane protein 7 [Arachis ipaensis]		arahy.Tifrunner.gnm1.ann1.2Q5L91	DUF241 domain protein [Medicago truncatula]
arahy.Tifrunner.gnm1.ann1.V5GBYV.1	891	T	serine/threonine-protein kinase EDR1-like isoform X1 [Arachis ipaensis]		arahy.Tifrunner.gnm1.ann1.X0ULI9.1	574	S	serine/threonine-protein kinase D6PKL2-like [Arachis duranensis]		arahy.Tifrunner.gnm1.ann1.1H9F4R.1	87	S	patellin-3-like [Arachis ipaensis]		arahy.Tifrunner.gnm1.ann1.2QV4RS.1	auxin efflux carrier component 4-like isoform X1 [Arachis ipaensis]
arahy.Tifrunner.gnm1.ann1.NAQH5K.1	967	T	"ATPase 11, plasma membrane-type [Arachis ipaensis]"		arahy.Tifrunner.gnm1.ann1.JE1LMX.1	163	S	serine/arginine-rich splicing factor RSZ21-like isoform X1 [Arachis ipaensis]		arahy.Tifrunner.gnm1.ann1.1JAQ89.1	189	S	rhomboid-like protein 19 [Arachis duranensis]		arahy.Tifrunner.gnm1.ann1.2R15U2	BZIP transcription factor [Medicago truncatula]
arahy.Tifrunner.gnm1.ann1.FCRD5F.1	215	S	auxin efflux carrier component 4-like isoform X1 [Arachis ipaensis]		arahy.Tifrunner.gnm1.ann1.94UTWG.1	448	S	protein FRIGIDA [Arachis duranensis]		arahy.Tifrunner.gnm1.ann1.1JKV8J.1	88	S	"triosephosphate isomerase, chloroplastic [Arachis duranensis]"		arahy.Tifrunner.gnm1.ann1.2RB1YT.1	flowering time control protein FPA [Arachis duranensis]
arahy.Tifrunner.gnm1.ann1.SN4UZH.2	45	S	reticulon-like protein B2 [Arachis duranensis]		arahy.Tifrunner.gnm1.ann1.ZASQ2Z.1	17	S	late embryogenesis abundant protein [Medicago truncatula]		arahy.Tifrunner.gnm1.ann1.1JP5N1	27	S	far upstream element-binding protein 2-like [Arachis ipaensis]		arahy.Tifrunner.gnm1.ann1.2S25M9.2	"trafficking protein particle complex subunit 11, partial [Arachis duranensis]"
arahy.Tifrunner.gnm1.ann1.7M06WQ.1	283	S	protein WVD2-like 2 [Arachis ipaensis]		arahy.Tifrunner.gnm1.ann1.J5ATDZ.1	344	S	chaperone protein dnaJ 10 [Arachis ipaensis]		arahy.Tifrunner.gnm1.ann1.1JP5N1	112	S	far upstream element-binding protein 2-like [Arachis ipaensis]		arahy.Tifrunner.gnm1.ann1.2S6U71	tankyrase-1 [Arachis duranensis]
arahy.Tifrunner.gnm1.ann1.73LV1S.3	220	S	probable ADP-ribosylation factor GTPase-activating protein AGD14 [Arachis duranensis]		arahy.Tifrunner.gnm1.ann1.FAC3HW.1	230	S	eukaryotic translation initiation factor 4B2-like [Arachis duranensis]		arahy.Tifrunner.gnm1.ann1.1JP5N1	114	S	far upstream element-binding protein 2-like [Arachis ipaensis]		arahy.Tifrunner.gnm1.ann1.2TW5YI.1	squamous cell carcinoma antigen recognized by T-cells 3 [Arachis ipaensis]
arahy.Tifrunner.gnm1.ann1.J8TUD1.1	519	S	calcium-dependent protein kinase 32 [Arachis duranensis]		arahy.Tifrunner.gnm1.ann1.B8YDI3.1	442	S	serine/threonine-protein kinase CDL1-like [Arachis ipaensis]		arahy.Tifrunner.gnm1.ann1.1K6ZH2	266	S	two-component response regulator-like APRR7 isoform X1 [Arachis duranensis]		arahy.Tifrunner.gnm1.ann1.2UVC2V.1	SAC3 family protein B isoform X1 [Arachis ipaensis]
arahy.Tifrunner.gnm1.ann1.0AQ0IW.3	172	S	U1 small nuclear ribonucleoprotein 70 kDa-like [Cajanus cajan]		arahy.Tifrunner.gnm1.ann1.W4CT0I.1	423	S	calmodulin-binding receptor-like cytoplasmic kinase 2 [Arachis ipaensis]		arahy.Tifrunner.gnm1.ann1.1M6YYJ.2	638	S	protein PAF1 homolog [Arachis ipaensis]		arahy.Tifrunner.gnm1.ann1.2VHL38.2	transmembrane protein 33 homolog [Arachis ipaensis]
arahy.Tifrunner.gnm1.ann1.B8YDI3.1	438	T	serine/threonine-protein kinase CDL1-like [Arachis ipaensis]		arahy.Tifrunner.gnm1.ann1.K2PXHZ.1	341	S	serine/arginine-rich splicing factor SR45 [Arachis ipaensis]		arahy.Tifrunner.gnm1.ann1.1N9EH1	221	S	zinc finger protein 511 [Arachis ipaensis]		arahy.Tifrunner.gnm1.ann1.2WLS1Y.1	eukaryotic translation initiation factor 4B2-like [Arachis ipaensis]
arahy.Tifrunner.gnm1.ann1.CQAX74.1	191	S	actin cross-linking protein [Medicago truncatula]		arahy.Tifrunner.gnm1.ann1.03DKLN.1	38	S	MLP-like protein 423 [Arachis ipaensis]		arahy.Tifrunner.gnm1.ann1.1NC23U.1	401	S	midasin-like [Glycine max]		arahy.Tifrunner.gnm1.ann1.2WY12S.1	lysM domain receptor-like kinase 4 [Arachis ipaensis]
arahy.Tifrunner.gnm1.ann1.JA3EPN.1	12	S	WD repeat-containing protein 48 isoform X2 [Arachis duranensis]		arahy.Tifrunner.gnm1.ann1.N9AH7W.1	259	T	DEAD-box ATP-dependent RNA helicase 38-like [Arachis duranensis]		arahy.Tifrunner.gnm1.ann1.1NC23U.1	1015	S	midasin-like [Glycine max]		arahy.Tifrunner.gnm1.ann1.2X8VUU.1	hydroxyacylglutathione hydrolase cytoplasmic [Arachis ipaensis]
arahy.Tifrunner.gnm1.ann1.VTJ29R.2	32	S	COX assembly mitochondrial protein 2 homolog [Arachis ipaensis]		arahy.Tifrunner.gnm1.ann1.2Z77FC.1	107	S	HMG-Y-related protein A-like [Arachis ipaensis]		arahy.Tifrunner.gnm1.ann1.1NC23U.1	1017	S	midasin-like [Glycine max]		arahy.Tifrunner.gnm1.ann1.2XG0S2	NADPH--cytochrome P450 reductase 2 [Arachis duranensis]
arahy.Tifrunner.gnm1.ann1.46GERB.1	710	S	kinesin-like protein KCA2 [Arachis ipaensis]		arahy.Tifrunner.gnm1.ann1.K23Z11.1	30	S	transcription factor VIP1 [Arachis duranensis]		arahy.Tifrunner.gnm1.ann1.1NC23U.1	1236	S	midasin-like [Glycine max]		arahy.Tifrunner.gnm1.ann1.2XR4L9.1	phosphoinositide phospholipase C 6-like isoform X1 [Arachis ipaensis]
arahy.Tifrunner.gnm1.ann1.G5X8S7.1	154	S	putative protein TPRXL [Lupinus angustifolius]		arahy.Tifrunner.gnm1.ann1.AE9G4B.2	70	T	dystrophia myotonica WD repeat-containing protein-like [Arachis ipaensis]		arahy.Tifrunner.gnm1.ann1.1NC23U.1	1238	S	midasin-like [Glycine max]		arahy.Tifrunner.gnm1.ann1.2YU2K1	zinc finger MYM-type protein 1-like [Arachis ipaensis]
arahy.Tifrunner.gnm1.ann1.W001RR.1	39	T	AT-hook motif nuclear-localized protein 6-like [Arachis ipaensis]		arahy.Tifrunner.gnm1.ann1.Z4J9LG.1	11	S	exocyst complex component EXO84B [Arachis duranensis]		arahy.Tifrunner.gnm1.ann1.1NC23U.1	1240	S	midasin-like [Glycine max]		arahy.Tifrunner.gnm1.ann1.2YXT8K.4	mitogen-activated protein kinase kinase kinase YODA-like [Arachis duranensis]
arahy.Tifrunner.gnm1.ann1.Z7TKRX.2	50	S	"protein TIC110, chloroplastic-like [Glycine max]"		arahy.Tifrunner.gnm1.ann1.WVVG4E.2	418	S	nuclear envelope integral membrane protein 1 isoform X2 [Lupinus angustifolius]		arahy.Tifrunner.gnm1.ann1.1P4EVJ.1	253	S	protein FAR1-RELATED SEQUENCE 5-like [Arachis duranensis]		arahy.Tifrunner.gnm1.ann1.2Z77F1	HMG-Y-related protein A-like [Arachis ipaensis]
arahy.Tifrunner.gnm1.ann1.MZJQ36.2	103	S	ubiquitin carboxyl-terminal hydrolase 4 isoform X1 [Arachis ipaensis]		arahy.Tifrunner.gnm1.ann1.IV9MYI.1	390	S	cyclin-dependent kinase D-3-like [Arachis ipaensis]		arahy.Tifrunner.gnm1.ann1.1PUV9L.1	110	S	protein JASON-like isoform X1 [Arachis ipaensis]		arahy.Tifrunner.gnm1.ann1.2Z7XPV.1	DUF4228 domain protein [Medicago truncatula]
arahy.Tifrunner.gnm1.ann1.TGV54E.1	88	S	ABC transporter G family member 3-like [Arachis ipaensis]		arahy.Tifrunner.gnm1.ann1.S4AEC7.1	338	S	"protochlorophyllide reductase, chloroplastic [Arachis ipaensis]"		arahy.Tifrunner.gnm1.ann1.1R75EY.1	28	S	ninja-family protein AFP3 [Arachis duranensis]		arahy.Tifrunner.gnm1.ann1.2ZBI42.1	ABC transporter I family member 21 [Arachis ipaensis]
arahy.Tifrunner.gnm1.ann1.W9U8CY.1	88	S	"glycine dehydrogenase (decarboxylating), mitochondrial [Arachis ipaensis]"		arahy.Tifrunner.gnm1.ann1.1VR9T8.1	772	S	calcium permeable stress-gated cation channel 1-like [Arachis ipaensis]		arahy.Tifrunner.gnm1.ann1.1SB5R1.1	22	S	ubiquitin carboxyl-terminal hydrolase 2 [Arachis duranensis]		arahy.Tifrunner.gnm1.ann1.30ZN3V.2	protein MID1-COMPLEMENTING ACTIVITY 1-like [Arachis ipaensis]
arahy.Tifrunner.gnm1.ann1.L7259M.1	40	T	probable NAD(P)H dehydrogenase (quinone) FQR1-like 2 [Arachis duranensis]		arahy.Tifrunner.gnm1.ann1.YG552F.3	82	S	ankyrin repeat and SAM domain-containing protein 6 [Arachis ipaensis]		arahy.Tifrunner.gnm1.ann1.1SB772.3	53	S	sterol 3-beta-glucosyltransferase UGT80B1 [Arachis ipaensis]		arahy.Tifrunner.gnm1.ann1.31BJM1	PH-response transcription factor [Arabidopsis thaliana]
arahy.Tifrunner.gnm1.ann1.7J7UQ4.2	74	T	probable alkaline/neutral invertase D [Arachis duranensis]		arahy.Tifrunner.gnm1.ann1.USYB3W.1	10	T	UDP-glucuronate 4-epimerase 3-like [Arachis duranensis]		arahy.Tifrunner.gnm1.ann1.1SB772.3	58	S	sterol 3-beta-glucosyltransferase UGT80B1 [Arachis ipaensis]		arahy.Tifrunner.gnm1.ann1.32CIDN.1	protein IQ-DOMAIN 1-like [Arachis ipaensis]
arahy.Tifrunner.gnm1.ann1.YCI793.1	881	S	death-inducer obliterator 1 [Cajanus cajan]		arahy.Tifrunner.gnm1.ann1.LIU795.2	389	S	nucleolin 1-like isoform X1 [Arachis duranensis]		arahy.Tifrunner.gnm1.ann1.1SN7TU.2	9	S	probable aquaporin PIP-type 7a [Arachis duranensis]		arahy.Tifrunner.gnm1.ann1.32G3LI.2	E3 ubiquitin-protein ligase At3g02290 [Arachis duranensis]
arahy.Tifrunner.gnm1.ann1.IQ8CLR.2	1328	S	protein TSS [Arachis duranensis]		arahy.Tifrunner.gnm1.ann1.PB2NQ7.1	634	S	serine/threonine-protein kinase dst2 isoform X5 [Arachis ipaensis]		arahy.Tifrunner.gnm1.ann1.1SN7TU.2	27	S	probable aquaporin PIP-type 7a [Arachis duranensis]		arahy.Tifrunner.gnm1.ann1.32PFV1	apoptosis inhibitor 5 [Arachis ipaensis]
arahy.Tifrunner.gnm1.ann1.E5CV98.1	1108	S	LOW QUALITY PROTEIN: mediator of RNA polymerase II transcription subunit 15a-like [Arachis duranensis]		arahy.Tifrunner.gnm1.ann1.L35I2V.2	573	S	"RING/FYVE/PHD zinc finger protein, putative [Medicago truncatula]"		arahy.Tifrunner.gnm1.ann1.1T1RVQ.1	224	S	putative HVA22-like protein g isoform X2 [Arachis duranensis]		arahy.Tifrunner.gnm1.ann1.338AY0.2	CW-type zinc-finger protein [Medicago truncatula]
arahy.Tifrunner.gnm1.ann1.BFT67J.1	14	S	selenoprotein K [Arachis ipaensis]		arahy.Tifrunner.gnm1.ann1.GA8N54.1	127	S	formin-like protein 14 isoform X1 [Arachis ipaensis]		arahy.Tifrunner.gnm1.ann1.1TT2GW.1	105	S	dynamin-2B-like [Arachis ipaensis]		arahy.Tifrunner.gnm1.ann1.33GLRJ.1	reticulon-like protein B5 [Arachis ipaensis]
arahy.Tifrunner.gnm1.ann1.I1HQCQ.2	159	S	ABSCISIC ACID-INSENSITIVE 5-like protein 2 isoform X3 [Arachis duranensis]		arahy.Tifrunner.gnm1.ann1.MNY5KW.1	209	T	coatomer subunit delta [Arachis ipaensis]		arahy.Tifrunner.gnm1.ann1.1TT2GW.1	536	S	dynamin-2B-like [Arachis ipaensis]		arahy.Tifrunner.gnm1.ann1.33JI2U.1	MYB family transcription factor [Medicago truncatula]
arahy.Tifrunner.gnm1.ann1.YR6AFM.2	391	S	protein fluG [Arachis ipaensis]		arahy.Tifrunner.gnm1.ann1.GBN5SF.2	714	S	serine/arginine repetitive matrix protein 2-like isoform X2 [Arachis ipaensis]		arahy.Tifrunner.gnm1.ann1.1TT2GW.1	724	S	dynamin-2B-like [Arachis ipaensis]		arahy.Tifrunner.gnm1.ann1.33UQPP.2	"probable aminopyrimidine aminohydrolase, mitochondrial [Arachis duranensis]"
arahy.Tifrunner.gnm1.ann1.ARVN7W.1	12	S	ethylene-responsive transcription factor ERF113 [Arachis ipaensis]		arahy.Tifrunner.gnm1.ann1.JYM9I0.1	446	S	filaggrin [Arachis ipaensis]		arahy.Tifrunner.gnm1.ann1.1TT2GW.1	818	S	dynamin-2B-like [Arachis ipaensis]		arahy.Tifrunner.gnm1.ann1.34H521	mannose-1-phosphate guanyltransferase alpha-like [Arachis ipaensis]
arahy.Tifrunner.gnm1.ann1.FJS2VQ.1	73	S	60S ribosomal protein L22-2-like [Arachis ipaensis]		arahy.Tifrunner.gnm1.ann1.9QU84Y.10	411	S	serine/threonine-protein kinase Nek6-like [Arachis duranensis]		arahy.Tifrunner.gnm1.ann1.1TT2GW.1	873	S	dynamin-2B-like [Arachis ipaensis]		arahy.Tifrunner.gnm1.ann1.34WN1K.1	syntaxin-22-like [Arachis duranensis]
arahy.Tifrunner.gnm1.ann1.V5GBYV.1	885	S	serine/threonine-protein kinase EDR1-like isoform X1 [Arachis ipaensis]		arahy.Tifrunner.gnm1.ann1.2FUK2Z.2	329	S	uncharacterized membrane protein At3g27390-like isoform X1 [Arachis ipaensis]		arahy.Tifrunner.gnm1.ann1.1TT2GW.3	207	S	dynamin-2B-like [Arachis duranensis]		arahy.Tifrunner.gnm1.ann1.350VGV.1	aquaporin NIP6-1 [Arachis ipaensis]
arahy.Tifrunner.gnm1.ann1.I1MI1E.1	383	S	serine/threonine-protein kinase CDL1 [Arachis duranensis]		arahy.Tifrunner.gnm1.ann1.N6J268.1	14	S	nucleobase-ascorbate transporter 12 isoform X1 [Arachis duranensis]		arahy.Tifrunner.gnm1.ann1.1TT2GW.3	395	S	dynamin-2B-like [Arachis duranensis]		arahy.Tifrunner.gnm1.ann1.36HDX1	glutaredoxin (GRX) family protein [Medicago truncatula]
arahy.Tifrunner.gnm1.ann1.Y5G5FZ.1	33	S	CBS domain-containing protein CBSCBSPB1 [Arachis ipaensis]		arahy.Tifrunner.gnm1.ann1.68WCMC.1	503	S	synaptotagmin-5 [Arachis ipaensis]		arahy.Tifrunner.gnm1.ann1.1TT2GW.3	489	S	dynamin-2B-like [Arachis duranensis]		arahy.Tifrunner.gnm1.ann1.36PEC4.1	codeine O-demethylase-like [Arachis ipaensis]
arahy.Tifrunner.gnm1.ann1.TQP87P.3	70	S	chloride intracellular channel protein 6-like [Pyrus x bretschneideri]		arahy.Tifrunner.gnm1.ann1.IBI25X.1	228	S	glyoxylate/succinic semialdehyde reductase 1 [Arachis ipaensis]		arahy.Tifrunner.gnm1.ann1.1U7IT4.1	45	S	J domain-containing protein required for chloroplast accumulation response 1 [Arachis duranensis]		arahy.Tifrunner.gnm1.ann1.38CFQ6.2	villin-1 [Arachis duranensis]
arahy.Tifrunner.gnm1.ann1.AE9G4B.2	82	S	dystrophia myotonica WD repeat-containing protein-like [Arachis ipaensis]		arahy.Tifrunner.gnm1.ann1.87PYFW.1	117	S	plastid movement impaired protein [Medicago truncatula]		arahy.Tifrunner.gnm1.ann1.1U7IT4.1	55	S	J domain-containing protein required for chloroplast accumulation response 1 [Arachis duranensis]		arahy.Tifrunner.gnm1.ann1.38UXAL.1	glutamate receptor 3.6-like [Arachis duranensis]
arahy.Tifrunner.gnm1.ann1.WP52TP.1	103	S	60S acidic ribosomal protein P2-1-like [Arachis duranensis]		arahy.Tifrunner.gnm1.ann1.V8BLVD.1	129	S	DUF688 family protein [Medicago truncatula]		arahy.Tifrunner.gnm1.ann1.1U7IT4.1	351	S	J domain-containing protein required for chloroplast accumulation response 1 [Arachis duranensis]		arahy.Tifrunner.gnm1.ann1.38UXAL.2	glutamate receptor 3.6-like [Arachis duranensis]
arahy.Tifrunner.gnm1.ann1.Y758W9.1	57	S	60S ribosomal protein L29-1-like [Arachis ipaensis]		arahy.Tifrunner.gnm1.ann1.8H8JUA.1	649	S	serine/arginine-rich splicing factor RS40 isoform X1 [Arachis duranensis]		arahy.Tifrunner.gnm1.ann1.1U7IT4.1	445	S	J domain-containing protein required for chloroplast accumulation response 1 [Arachis duranensis]		arahy.Tifrunner.gnm1.ann1.39P5N1	187-kDa microtubule-associated protein AIR9 [Arachis duranensis]
arahy.Tifrunner.gnm1.ann1.QELJ5B.1	269	S	plant/F27B13-30 protein [Medicago truncatula]		arahy.Tifrunner.gnm1.ann1.ZA4BYI.1	30	S	probable cinnamyl alcohol dehydrogenase 1 [Arachis duranensis]		arahy.Tifrunner.gnm1.ann1.1V1Y36.2	1587	S	CCR4-NOT transcription complex subunit 1 isoform X2 [Arachis ipaensis]		arahy.Tifrunner.gnm1.ann1.39XKQR.1	mediator of RNA polymerase II transcription subunit 14 [Arachis ipaensis]
arahy.Tifrunner.gnm1.ann1.0CFS5U.2	96	S	DEAD-box ATP-dependent RNA helicase 20-like [Arachis duranensis]		arahy.Tifrunner.gnm1.ann1.RA272M.1	366	S			arahy.Tifrunner.gnm1.ann1.1V29TX.1	127	S	transcription initiation factor TFIID subunit 10 [Arachis ipaensis]		arahy.Tifrunner.gnm1.ann1.3A3GYI.1	senescence regulator [Medicago truncatula]
arahy.Tifrunner.gnm1.ann1.XC2T0Q.1	194	S	protein WVD2-like 4 [Arachis ipaensis]		arahy.Tifrunner.gnm1.ann1.00VL53.1	321	S	probable inactive receptor kinase At2g26730 [Arachis ipaensis]		arahy.Tifrunner.gnm1.ann1.1VDT9U.1	18	S	KH domain-containing protein At2g38610-like isoform X2 [Arachis duranensis]		arahy.Tifrunner.gnm1.ann1.3B9L35.1	"transmembrane protein, putative [Medicago truncatula]"
arahy.Tifrunner.gnm1.ann1.B8KV7F.1	1402	S	protein transport protein SEC16A homolog isoform X1 [Arachis ipaensis]		arahy.Tifrunner.gnm1.ann1.TQX8J8.1	206	T	E3 ubiquitin-protein ligase At1g63170 [Arachis duranensis]		arahy.Tifrunner.gnm1.ann1.1VDT9U.2	18	S	KH domain-containing protein At2g38610-like isoform X2 [Arachis duranensis]		arahy.Tifrunner.gnm1.ann1.3BTA48.1	late embryogenesis abundant protein [Medicago truncatula]
arahy.Tifrunner.gnm1.ann1.M21JET.2	122	S	dr1-associated corepressor homolog [Arachis ipaensis]		arahy.Tifrunner.gnm1.ann1.M21JET.2	194	S	dr1-associated corepressor homolog [Arachis ipaensis]		arahy.Tifrunner.gnm1.ann1.1VR9T8.1	772	S	calcium permeable stress-gated cation channel 1-like [Arachis ipaensis]		arahy.Tifrunner.gnm1.ann1.3D2TC1.2	serine/threonine-protein kinase D6PKL1 [Arachis ipaensis]
arahy.Tifrunner.gnm1.ann1.JA8H3U.1	66	S	"transmembrane protein, putative [Medicago truncatula]"		arahy.Tifrunner.gnm1.ann1.KF5N5L.1	619	S	DUF668 family protein [Medicago truncatula]		arahy.Tifrunner.gnm1.ann1.1VS4ZL.2	242	S	zonadhesin-like [Arachis ipaensis]		arahy.Tifrunner.gnm1.ann1.3EVA1Y.1	spermine synthase isoform X1 [Arachis duranensis]
arahy.Tifrunner.gnm1.ann1.BEGE34.2	231	S	transmembrane protein [Arabidopsis thaliana]		arahy.Tifrunner.gnm1.ann1.KDE77Y.4	224	S	pumilio homolog 2-like [Arachis ipaensis]		arahy.Tifrunner.gnm1.ann1.1W2EAK.1	180	S	protein RESTRICTED TEV MOVEMENT 2-like [Arachis duranensis]		arahy.Tifrunner.gnm1.ann1.3EVX71	"peptidoglycan-binding LysM domain protein, putative [Medicago truncatula]"
arahy.Tifrunner.gnm1.ann1.0WKN8B.1	269	S	translation initiation factor IF-2 isoform X2 [Arachis ipaensis]		arahy.Tifrunner.gnm1.ann1.HQV3E1.1	323	S	zinc finger CCCH domain-containing protein 4-like [Arachis duranensis]		arahy.Tifrunner.gnm1.ann1.1Y45Q7.1	145	S	protein DETOXIFICATION 42-like [Arachis ipaensis]		arahy.Tifrunner.gnm1.ann1.3GAL91	"(R,S)-reticuline 7-O-methyltransferase-like [Arachis duranensis]"
arahy.Tifrunner.gnm1.ann1.Y5NR52.2	295	Y	dual specificity tyrosine-phosphorylation-regulated kinase 1B [Arachis ipaensis]		arahy.Tifrunner.gnm1.ann1.N8S0IJ.3	147	S	chromatin structure-remodeling complex protein SYD-like isoform X1 [Arachis duranensis]		arahy.Tifrunner.gnm1.ann1.1YL9TV.1	201	S	dr1-associated corepressor homolog [Arachis duranensis]		arahy.Tifrunner.gnm1.ann1.3HMZ7U.1	auxilin-related protein 2-like isoform X1 [Arachis ipaensis]
arahy.Tifrunner.gnm1.ann1.BH8PB4.2	164	S	"protein VASCULAR ASSOCIATED DEATH 1, chloroplastic isoform X1 [Arachis ipaensis]"		arahy.Tifrunner.gnm1.ann1.G68EH0.2	1256	S	protein TSS isoform X2 [Arachis ipaensis]		arahy.Tifrunner.gnm1.ann1.1Z0BUP.1	75	S			arahy.Tifrunner.gnm1.ann1.3I6JR3.1	conserved oligomeric Golgi complex subunit 5 [Arachis duranensis]
arahy.Tifrunner.gnm1.ann1.6AD899.1	46	S	tRNA-dihydrouridine(47) synthase [NAD(P)(+)]-like [Arachis duranensis]		arahy.Tifrunner.gnm1.ann1.1U7IT4.1	55	S	J domain-containing protein required for chloroplast accumulation response 1 [Arachis duranensis]		arahy.Tifrunner.gnm1.ann1.1Z9FJQ.2	121	S	protein N-lysine methyltransferase METTL21A [Arachis ipaensis]		arahy.Tifrunner.gnm1.ann1.3IB4N1	putative mediator of RNA polymerase II transcription subunit 12 [Arachis ipaensis]
arahy.Tifrunner.gnm1.ann1.0NLM3R.1	15	S	zinc finger CCCH domain-containing protein 37-like isoform X1 [Arachis duranensis]		arahy.Tifrunner.gnm1.ann1.IC24VR.1	1441	S	uncharacterized LOC100274068 [Zea mays]		arahy.Tifrunner.gnm1.ann1.1ZJY2Z.2	627	S	probable leucine-rich repeat receptor-like protein kinase At5g49770 [Arachis ipaensis]		arahy.Tifrunner.gnm1.ann1.3J4V91	trafficking protein particle complex II-specific subunit 130 homolog [Arachis ipaensis]
arahy.Tifrunner.gnm1.ann1.XC1VLW.1	18	S	"glucose-6-phosphate 1-dehydrogenase, cytoplasmic isoform [Arachis duranensis]"		arahy.Tifrunner.gnm1.ann1.X9QM54.2	135	S	transcription factor bHLH113 isoform X2 [Arachis ipaensis]		arahy.Tifrunner.gnm1.ann1.201XHT.4	218	S	flippase kinase 1 [Arachis ipaensis]		arahy.Tifrunner.gnm1.ann1.3J71J7.1	protein SAD1/UNC-84 domain protein 1-like [Arachis ipaensis]
arahy.Tifrunner.gnm1.ann1.W4Y87I.1	718	S	protein STRUBBELIG-RECEPTOR FAMILY 8 [Arachis ipaensis]		arahy.Tifrunner.gnm1.ann1.X1IMZB.1	405	T	synaptotagmin-2-like [Arachis ipaensis]		arahy.Tifrunner.gnm1.ann1.201XHT.4	583	S	flippase kinase 1 [Arachis ipaensis]		arahy.Tifrunner.gnm1.ann1.3KND22	zinc finger CCCH domain-containing protein 44-like isoform X1 [Glycine max]
arahy.Tifrunner.gnm1.ann1.9W5UDX.2	15	S	RNA polymerase II transcriptional coactivator KIWI-like [Arachis ipaensis]		arahy.Tifrunner.gnm1.ann1.ZE8HJS.1	54	T	RNA-binding protein 8A-B [Arachis ipaensis]		arahy.Tifrunner.gnm1.ann1.201XHT.4	893	S	flippase kinase 1 [Arachis ipaensis]		arahy.Tifrunner.gnm1.ann1.3KSC2Z.1	protein ABHD17B-like [Arachis ipaensis]
arahy.Tifrunner.gnm1.ann1.P7Z227.1	347	S	probable transcription factor KAN2 [Arachis duranensis]		arahy.Tifrunner.gnm1.ann1.59HWIF.1	130	S	probable proteasome inhibitor isoform X1 [Arachis ipaensis]		arahy.Tifrunner.gnm1.ann1.2022SK.2	104	S	protein transport protein SEC23 [Arachis ipaensis]		arahy.Tifrunner.gnm1.ann1.3M2LT7.1	serine/arginine-rich splicing factor RS40 isoform X1 [Arachis ipaensis]
arahy.Tifrunner.gnm1.ann1.GBJ0AR.1	63	T	putative potassium transporter 12 [Arachis duranensis]		arahy.Tifrunner.gnm1.ann1.1EDB5Y.1	753	S	centrosomal protein of 164 kDa isoform X3 [Arachis ipaensis]		arahy.Tifrunner.gnm1.ann1.2022SK.2	640	S	protein transport protein SEC23 [Arachis ipaensis]		arahy.Tifrunner.gnm1.ann1.3M73WP.1	transcription factor RF2a-like [Cajanus cajan]
arahy.Tifrunner.gnm1.ann1.U2SLBT.1	96	S	probable ADP-ribosylation factor GTPase-activating protein AGD8 [Arachis ipaensis]		arahy.Tifrunner.gnm1.ann1.99PJJG.1	100	S	probable transcription factor PosF21 [Arachis ipaensis]		arahy.Tifrunner.gnm1.ann1.2022SK.2	1332	S	protein transport protein SEC23 [Arachis ipaensis]		arahy.Tifrunner.gnm1.ann1.3MI4YM.1	serine/threonine-protein kinase At5g01020-like [Arachis ipaensis]
arahy.Tifrunner.gnm1.ann1.16GZH2.1	97	S	lysine-rich arabinogalactan protein 19-like [Arachis duranensis]		arahy.Tifrunner.gnm1.ann1.07091Z.1	413	S	"mono/di-acylglycerol lipase, amino-terminal [Medicago truncatula]"		arahy.Tifrunner.gnm1.ann1.203Q7N.1	270	S	LOW QUALITY PROTEIN: ABSCISIC ACID-INSENSITIVE 5-like protein 2 [Arachis ipaensis]		arahy.Tifrunner.gnm1.ann1.3ML67S.1	serine/threonine-protein kinase SRK2A-like [Arachis duranensis]
arahy.Tifrunner.gnm1.ann1.SI7QTZ.1	212	S	probable membrane-associated kinase regulator 1 [Arachis ipaensis]		arahy.Tifrunner.gnm1.ann1.11BQ2X.4	207	S	serine/arginine-rich splicing factor RS31-like isoform X1 [Arachis ipaensis]		arahy.Tifrunner.gnm1.ann1.207GSN.2	88	S	ABSCISIC ACID-INSENSITIVE 5-like protein 2 isoform X3 [Arachis duranensis]		arahy.Tifrunner.gnm1.ann1.3NB7S1	HMG1/2-like protein [Arachis duranensis]
arahy.Tifrunner.gnm1.ann1.H5PABG.2	156	S	AMSH-like ubiquitin thioesterase 3 [Arachis ipaensis]		arahy.Tifrunner.gnm1.ann1.TQ6BSY.1	194	S	tobamovirus multiplication protein 2A-like [Arachis duranensis]		arahy.Tifrunner.gnm1.ann1.207GSN.2	159	S	ABSCISIC ACID-INSENSITIVE 5-like protein 2 isoform X3 [Arachis duranensis]		arahy.Tifrunner.gnm1.ann1.3P0VV4	mitogen-activated protein kinase 20-like [Arachis ipaensis]
arahy.Tifrunner.gnm1.ann1.64EDPK.1	31	T	"probable receptor-like serine/threonine-protein kinase At5g57670, partial [Arachis duranensis]"		arahy.Tifrunner.gnm1.ann1.FMX4TW.2	155	S	protein EI24 homolog [Arachis ipaensis]		arahy.Tifrunner.gnm1.ann1.21Z9D1	381	S	ABC1 family protein [Arabidopsis lyrata subsp. lyrata]		arahy.Tifrunner.gnm1.ann1.3P9E70.2	DUF21 domain-containing protein At4g14240-like [Arachis ipaensis]
arahy.Tifrunner.gnm1.ann1.WJT401.2	222	S	BEL1-like homeodomain protein 7 [Arachis ipaensis]		arahy.Tifrunner.gnm1.ann1.WS9SL7.1	314	S	probable magnesium transporter NIPA6 [Arachis duranensis]		arahy.Tifrunner.gnm1.ann1.22A3IK.1	18	S	"transmembrane protein, putative (DUF679) [Arabidopsis thaliana]"		arahy.Tifrunner.gnm1.ann1.3PG13R.1	N6-adenosine-methyltransferase MT-A70-like [Arachis duranensis]
arahy.Tifrunner.gnm1.ann1.D15RR9.1	345	S	transcription factor TCP4-like [Arachis duranensis]		arahy.Tifrunner.gnm1.ann1.86R49N.1	3	S	D-xylose-proton symporter-like 2 isoform X1 [Arachis duranensis]		arahy.Tifrunner.gnm1.ann1.22FU97.1	273	S	transcription factor TCP8 [Arachis ipaensis]		arahy.Tifrunner.gnm1.ann1.3PP5US.1	"photosystem I chlorophyll a/b-binding protein 6, chloroplastic [Arachis duranensis]"
arahy.Tifrunner.gnm1.ann1.0V2EN1.2	107	S	fimbrin-5-like [Arachis ipaensis]		arahy.Tifrunner.gnm1.ann1.9UJZ67.1	510	S	sorting nexin carboxy-terminal protein [Medicago truncatula]		arahy.Tifrunner.gnm1.ann1.22L7F1	129	S	"psbP domain-containing protein 5, chloroplastic [Arachis duranensis]"		arahy.Tifrunner.gnm1.ann1.3Q5GH0.1	U-box domain-containing protein 7 [Arachis ipaensis]
arahy.Tifrunner.gnm1.ann1.H1KJG3.1	219	S	polyadenylation and cleavage factor homolog 4-like [Glycine max]		arahy.Tifrunner.gnm1.ann1.XZS3UD.1	95	S	la-related protein 1B-like [Arachis ipaensis]		arahy.Tifrunner.gnm1.ann1.22LF01	240	S	protein FLX-like 3 [Arachis ipaensis]		arahy.Tifrunner.gnm1.ann1.3QB6PJ.1	aspartic proteinase-like protein 2 isoform X4 [Arachis duranensis]
arahy.Tifrunner.gnm1.ann1.A2Z0UC.2	577	S	phototropin-2 [Arachis ipaensis]		arahy.Tifrunner.gnm1.ann1.R92S31.2	577	S	uridine-cytidine kinase C-like isoform X1 [Arachis ipaensis]		arahy.Tifrunner.gnm1.ann1.22LF01	275	S	protein FLX-like 3 [Arachis ipaensis]		arahy.Tifrunner.gnm1.ann1.3RP3M7.1	plastid movement impaired protein [Medicago truncatula]
arahy.Tifrunner.gnm1.ann1.S49I6H.2	21	S	elongation factor 1-alpha-like [Arachis ipaensis]		arahy.Tifrunner.gnm1.ann1.BAH7Z0.1	37	S	probable pectin methyltransferase QUA2 [Arachis ipaensis]		arahy.Tifrunner.gnm1.ann1.22W300.3	40	S	protein RCC2 homolog [Arachis ipaensis]		arahy.Tifrunner.gnm1.ann1.3SV7H4.1	CDK-activating kinase assembly factor MAT1 [Arachis ipaensis]
arahy.Tifrunner.gnm1.ann1.XQ9TSC.3	407	S	ultraviolet-B receptor UVR8 [Arachis duranensis]		arahy.Tifrunner.gnm1.ann1.QI6NWI.1	88	S	plastid movement impaired protein [Medicago truncatula]		arahy.Tifrunner.gnm1.ann1.22W300.3	47	S	protein RCC2 homolog [Arachis ipaensis]		arahy.Tifrunner.gnm1.ann1.3T3M0P.1	"stromal 70 kDa heat shock-related protein, chloroplastic isoform X1 [Arachis ipaensis]"
arahy.Tifrunner.gnm1.ann1.X3YRCT.2	146	T	eukaryotic translation initiation factor 4G-like isoform X1 [Arachis duranensis]		arahy.Tifrunner.gnm1.ann1.D1K6PT.1	646	S	formin-like protein 5 [Arachis ipaensis]		arahy.Tifrunner.gnm1.ann1.230XUM.2	99	S	heterogeneous nuclear ribonucleoprotein 1-like [Arachis ipaensis]		arahy.Tifrunner.gnm1.ann1.3T59B3	serine/threonine-protein kinase HT1-like [Arachis ipaensis]
arahy.Tifrunner.gnm1.ann1.NEIN3W.1	375	S	mediator of RNA polymerase II transcription subunit 15 isoform X1 [Arachis duranensis]		arahy.Tifrunner.gnm1.ann1.Q9AYUR.1	456	S	sodium/hydrogen exchanger 1-like [Arachis ipaensis]		arahy.Tifrunner.gnm1.ann1.230XUM.2	101	S	heterogeneous nuclear ribonucleoprotein 1-like [Arachis ipaensis]		arahy.Tifrunner.gnm1.ann1.3THH2M.2	probable transcriptional regulator SLK2 isoform X1 [Arachis ipaensis]
arahy.Tifrunner.gnm1.ann1.P96X61.2	371	S	"fructose-bisphosphate aldolase 1, chloroplastic [Arachis duranensis]"		arahy.Tifrunner.gnm1.ann1.YB5EX7.1	2	T	ubiquitin-conjugating enzyme E2 variant 1C [Arachis ipaensis]		arahy.Tifrunner.gnm1.ann1.230XUM.2	233	S	heterogeneous nuclear ribonucleoprotein 1-like [Arachis ipaensis]		arahy.Tifrunner.gnm1.ann1.3TU9D1	transcription factor BIM1 isoform X2 [Arachis duranensis]
arahy.Tifrunner.gnm1.ann1.YX753W.1	489	S	colon cancer-associated Mic1-like protein [Medicago truncatula]		arahy.Tifrunner.gnm1.ann1.P8DCPE.1	107	S	RPM1-interacting protein 4-like isoform X2 [Arachis duranensis]		arahy.Tifrunner.gnm1.ann1.230XUM.2	423	S	heterogeneous nuclear ribonucleoprotein 1-like [Arachis ipaensis]		arahy.Tifrunner.gnm1.ann1.3V4UGK.1	"senescence/dehydration-associated protein At4g35985, chloroplastic-like [Lupinus angustifolius]"
arahy.Tifrunner.gnm1.ann1.TU7XRI.1	28	S	universal stress protein PHOS32-like [Lupinus angustifolius]		arahy.Tifrunner.gnm1.ann1.LRN56Y.1	484	T	TBC1 domain family member 5 [Arachis duranensis]		arahy.Tifrunner.gnm1.ann1.232HH1	228	S	alkylated DNA repair protein alkB homolog 8 [Arachis ipaensis]		arahy.Tifrunner.gnm1.ann1.3X6E38.1	F-box family protein [Populus trichocarpa]
arahy.Tifrunner.gnm1.ann1.QD99PL.1	45	S	probable ADP-ribosylation factor GTPase-activating protein AGD5 [Arachis duranensis]		arahy.Tifrunner.gnm1.ann1.RL39CN.1	69	T			arahy.Tifrunner.gnm1.ann1.238B61	280	S	cell wall protein DAN4-like [Arachis duranensis]		arahy.Tifrunner.gnm1.ann1.3X6UQX.1	ubiquitin fusion degradation protein 1 homolog [Arachis ipaensis]
arahy.Tifrunner.gnm1.ann1.3Q5GH0.1	428	S	U-box domain-containing protein 7 [Arachis ipaensis]		arahy.Tifrunner.gnm1.ann1.AR272K.2	77	S	"putative methylesterase 12, chloroplastic isoform X2 [Arachis ipaensis]"		arahy.Tifrunner.gnm1.ann1.238B61	314	S	cell wall protein DAN4-like [Arachis duranensis]		arahy.Tifrunner.gnm1.ann1.3X8NRX.1	heat shock cognate 70 kDa protein 2 [Arachis ipaensis]
arahy.Tifrunner.gnm1.ann1.MV46JJ.1	109	T	TATA-binding protein-associated factor 2N-like [Arachis ipaensis]		arahy.Tifrunner.gnm1.ann1.G8RZTB.1	393	S	mucin-5AC-like [Arachis ipaensis]		arahy.Tifrunner.gnm1.ann1.23EZU0.1	354	S	hydroxyproline-rich glycoprotein family protein [Medicago truncatula]		arahy.Tifrunner.gnm1.ann1.3XEJ8W.2	trafficking protein particle complex subunit 1-like [Arachis ipaensis]
arahy.Tifrunner.gnm1.ann1.N274YR.1	184	S	Golgi SNAP receptor complex member 1-2 [Arachis ipaensis]		arahy.Tifrunner.gnm1.ann1.C0JSMI.1	229	S	GATA zinc finger domain-containing protein 10 [Ipomoea nil]		arahy.Tifrunner.gnm1.ann1.23EZU0.1	511	S	hydroxyproline-rich glycoprotein family protein [Medicago truncatula]		arahy.Tifrunner.gnm1.ann1.3YB7R6.2	prolyl-tRNA synthetase associated domain-containing protein 1-like [Lupinus angustifolius]
arahy.Tifrunner.gnm1.ann1.D0IPBT.1	1002	T	octicosapeptide/phox/Bem1p domain kinase superfamily protein [Medicago truncatula]		arahy.Tifrunner.gnm1.ann1.LAB5TB.1	12	S			arahy.Tifrunner.gnm1.ann1.23EZU0.1	588	S	hydroxyproline-rich glycoprotein family protein [Medicago truncatula]		arahy.Tifrunner.gnm1.ann1.3YC2HT.2	phosphoenolpyruvate carboxylase 4-like [Arachis ipaensis]
arahy.Tifrunner.gnm1.ann1.PS1ZIG.1	93	S	DEAD-box ATP-dependent RNA helicase 46 isoform X1 [Arachis duranensis]		arahy.Tifrunner.gnm1.ann1.T2XHT6.1	28	S	AT-hook motif nuclear-localized protein 5-like [Arachis duranensis]		arahy.Tifrunner.gnm1.ann1.23PF6N.2	372	S	"serine hydroxymethyltransferase, mitochondrial [Arachis duranensis]"		arahy.Tifrunner.gnm1.ann1.3YD711	"salt-inducible protein, putative [Medicago truncatula]"
arahy.Tifrunner.gnm1.ann1.9K340E.1	59	S	"putative methylesterase 12, chloroplastic isoform X1 [Arachis duranensis]"		arahy.Tifrunner.gnm1.ann1.4WKV82.1	388	T	"calcium sensing receptor, chloroplastic [Arachis ipaensis]"		arahy.Tifrunner.gnm1.ann1.23ZYRY.3	84	S	"calcium-transporting ATPase 9, plasma membrane-type-like [Arachis duranensis]"		arahy.Tifrunner.gnm1.ann1.40ANBN.2	"transcriptional regulator of RNA polII, SAGA, subunit [Medicago truncatula]"
arahy.Tifrunner.gnm1.ann1.9D7AF0.1	164	S	protein RESTRICTED TEV MOVEMENT 2-like [Arachis ipaensis]		arahy.Tifrunner.gnm1.ann1.HG7TPY.1	47	S	CASP-like protein 4A3 [Arachis duranensis]		arahy.Tifrunner.gnm1.ann1.23ZYRY.3	1043	S	"calcium-transporting ATPase 9, plasma membrane-type-like [Arachis duranensis]"		arahy.Tifrunner.gnm1.ann1.40BCK9.1	fasciclin-like arabinogalactan protein 15 [Arachis ipaensis]
arahy.Tifrunner.gnm1.ann1.22W300.3	40	S	protein RCC2 homolog [Arachis ipaensis]		arahy.Tifrunner.gnm1.ann1.HU64YQ.2	333	S	flowering time control protein FPA [Arachis ipaensis]		arahy.Tifrunner.gnm1.ann1.24ECRJ.2	77	S	probable alkaline/neutral invertase D [Arachis ipaensis]		arahy.Tifrunner.gnm1.ann1.40JDZM.3	mediator of RNA polymerase II transcription subunit 15a-like [Arachis duranensis]
arahy.Tifrunner.gnm1.ann1.L3AKFM.1	73	T	lysine histidine transporter-like 8 [Arachis duranensis]		arahy.Tifrunner.gnm1.ann1.QI6NWI.1	110	S	plastid movement impaired protein [Medicago truncatula]		arahy.Tifrunner.gnm1.ann1.24PQDM.2	46	S	probable protein phosphatase 2C 22 [Arachis duranensis]		arahy.Tifrunner.gnm1.ann1.415NE5.1	exocyst complex component SEC15B [Arachis ipaensis]
arahy.Tifrunner.gnm1.ann1.4BAF6Y.1	358	S	IST1-like protein isoform X2 [Arachis ipaensis]		arahy.Tifrunner.gnm1.ann1.IL7968.2	354	S	DUF3741 family protein [Medicago truncatula]		arahy.Tifrunner.gnm1.ann1.24PQDM.2	358	S	probable protein phosphatase 2C 22 [Arachis duranensis]		arahy.Tifrunner.gnm1.ann1.41MGIJ.1	synaptotagmin-5 [Arachis ipaensis]
arahy.Tifrunner.gnm1.ann1.GA8N54.1	120	T	formin-like protein 14 isoform X1 [Arachis ipaensis]		arahy.Tifrunner.gnm1.ann1.UI6D1P.1	588	S	xyloglucan glycosyltransferase 4 [Arachis duranensis]		arahy.Tifrunner.gnm1.ann1.24XUJ9.1	185	S	plant intracellular Ras-group-related LRR protein 5-like [Arachis duranensis]		arahy.Tifrunner.gnm1.ann1.41Y8R9.1	growth-regulating factor 7-like [Arachis duranensis]
arahy.Tifrunner.gnm1.ann1.L08NWK.1	28	S	NEDD8-conjugating enzyme Ubc12 [Arachis ipaensis]		arahy.Tifrunner.gnm1.ann1.CH6KF4.1	20	S	probable protein phosphatase 2C 35 isoform X1 [Arachis ipaensis]		arahy.Tifrunner.gnm1.ann1.24ZDA8.2	161	S	ankyrin repeat domain-containing protein 2B-like [Arachis ipaensis]		arahy.Tifrunner.gnm1.ann1.43249I.1	RNA polymerase-associated protein LEO1-like [Arachis ipaensis]
arahy.Tifrunner.gnm1.ann1.J3GQ4Y.3	115	S	"heme-binding-like protein At3g10130, chloroplastic isoform X2 [Arachis duranensis]"		arahy.Tifrunner.gnm1.ann1.00VL53.1	348	S	probable inactive receptor kinase At2g26730 [Arachis ipaensis]		arahy.Tifrunner.gnm1.ann1.24ZDA8.2	593	S	ankyrin repeat domain-containing protein 2B-like [Arachis ipaensis]		arahy.Tifrunner.gnm1.ann1.436L1R.1	"senescence/dehydration-associated protein At4g35985, chloroplastic-like [Cajanus cajan]"
arahy.Tifrunner.gnm1.ann1.ZA4BYI.1	389	S	probable cinnamyl alcohol dehydrogenase 1 [Arachis duranensis]		arahy.Tifrunner.gnm1.ann1.YK7683.1	653	S	agenet domain protein [Medicago truncatula]		arahy.Tifrunner.gnm1.ann1.25IG2V.1	312	S	rho GTPase-activating protein gacF-like [Arachis duranensis]		arahy.Tifrunner.gnm1.ann1.43NZX2.1	protein FAR1-RELATED SEQUENCE 5-like [Arachis ipaensis]
arahy.Tifrunner.gnm1.ann1.SMM8KX.1	303	S	PLAC8 family protein [Medicago truncatula]		arahy.Tifrunner.gnm1.ann1.S47DRU.1	162	S	UPF0396 protein [Arachis ipaensis]		arahy.Tifrunner.gnm1.ann1.25IG2V.1	382	S	rho GTPase-activating protein gacF-like [Arachis duranensis]		arahy.Tifrunner.gnm1.ann1.44QEU2.1	sodium/calcium exchanger family protein / calcium-binding EF hand family protein [Arabidopsis thaliana]
arahy.Tifrunner.gnm1.ann1.UWV4C8.1	58	S	probable apyrase 7 [Arachis ipaensis]		arahy.Tifrunner.gnm1.ann1.415NE5.1	780	S	exocyst complex component SEC15B [Arachis ipaensis]		arahy.Tifrunner.gnm1.ann1.25IG2V.1	386	S	rho GTPase-activating protein gacF-like [Arachis duranensis]		arahy.Tifrunner.gnm1.ann1.44Z8U5.3	plant/MEB5-like protein [Medicago truncatula]
arahy.Tifrunner.gnm1.ann1.P00SCV.1	121	T	DEAD-box ATP-dependent RNA helicase 8-like [Arachis ipaensis]		arahy.Tifrunner.gnm1.ann1.L3AKFM.1	95	T	lysine histidine transporter-like 8 [Arachis duranensis]		arahy.Tifrunner.gnm1.ann1.26R1C1	398	S	lysine-specific histone demethylase 1 homolog 3 [Arachis ipaensis]		arahy.Tifrunner.gnm1.ann1.45L0X3	pre-mRNA-splicing factor 38B [Arachis duranensis]
arahy.Tifrunner.gnm1.ann1.TGV54E.1	83	S	ABC transporter G family member 3-like [Arachis ipaensis]		arahy.Tifrunner.gnm1.ann1.3B9L35.1	42	S	"transmembrane protein, putative [Medicago truncatula]"		arahy.Tifrunner.gnm1.ann1.26W001	323	S	putative RNA-binding protein Luc7-like 2 [Arachis duranensis]		arahy.Tifrunner.gnm1.ann1.45SMBX.1	kinesin light chain [Arachis ipaensis]
arahy.Tifrunner.gnm1.ann1.U8THEZ.1	605	S	evolutionarily carboxy-terminal region protein [Medicago truncatula]		arahy.Tifrunner.gnm1.ann1.KA850A.1	29	S	transcription factor bHLH128-like [Arachis ipaensis]		arahy.Tifrunner.gnm1.ann1.26W001	329	S	putative RNA-binding protein Luc7-like 2 [Arachis duranensis]		arahy.Tifrunner.gnm1.ann1.46GER1	kinesin-like protein KCA2 [Arachis ipaensis]
arahy.Tifrunner.gnm1.ann1.CG4MLB.1	229	T	DUF724 domain-containing protein 3-like [Lupinus angustifolius]		arahy.Tifrunner.gnm1.ann1.RI6HQN.1	677	S	EEIG1/EHBP1 protein amino-terminal domain protein [Medicago truncatula]		arahy.Tifrunner.gnm1.ann1.26W001	339	S	putative RNA-binding protein Luc7-like 2 [Arachis duranensis]		arahy.Tifrunner.gnm1.ann1.46GER2	kinesin-like protein KCA2 [Arachis ipaensis]
arahy.Tifrunner.gnm1.ann1.69LNNJ.2	143	S	"phosphatidylinositol 3,4,5-trisphosphate 3-phosphatase and protein-tyrosine-phosphatase PTEN2A-like[Arachis duranensis]"		arahy.Tifrunner.gnm1.ann1.GWIQ86.1	188	S	probable mediator of RNA polymerase II transcription subunit 26c [Arachis ipaensis]		arahy.Tifrunner.gnm1.ann1.26W001	382	S	putative RNA-binding protein Luc7-like 2 [Arachis duranensis]		arahy.Tifrunner.gnm1.ann1.46S9P8.1	TOM1-like protein 2 [Arachis duranensis]
arahy.Tifrunner.gnm1.ann1.RP1N2X.1	195	S	"nucleoside diphosphate kinase IV, chloroplastic/mitochondrial-like isoform X2 [Arachis duranensis]"		arahy.Tifrunner.gnm1.ann1.L5FIWC.1	75	S	ABC transporter G family member 3-like [Arachis ipaensis]		arahy.Tifrunner.gnm1.ann1.26W001	395	S	putative RNA-binding protein Luc7-like 2 [Arachis duranensis]		arahy.Tifrunner.gnm1.ann1.478ZG4.2	"aspartate--tRNA ligase 2, cytoplasmic [Arachis ipaensis]"
arahy.Tifrunner.gnm1.ann1.YJ53B6.1	198	S	PH-response transcription factor [Arabidopsis thaliana]		arahy.Tifrunner.gnm1.ann1.VBZF8N.2	256	S	"4-hydroxy-3-methylbut-2-en-1-yl diphosphate synthase (ferredoxin), chloroplastic [Arachis duranensis]"		arahy.Tifrunner.gnm1.ann1.27GD0X.4	617	S	transcription initiation factor TFIID subunit 4b-like isoform X4 [Arachis ipaensis]		arahy.Tifrunner.gnm1.ann1.47PCZJ.2	annexin D2 [Arachis ipaensis]
arahy.Tifrunner.gnm1.ann1.A82XLX.1	37	S	chloride channel protein CLC-c-like [Arachis ipaensis]		arahy.Tifrunner.gnm1.ann1.NEJ4KC.2	380	T	probable transcription factor PosF21 [Arachis ipaensis]		arahy.Tifrunner.gnm1.ann1.27GD0X.4	1064	S	transcription initiation factor TFIID subunit 4b-like isoform X4 [Arachis ipaensis]		arahy.Tifrunner.gnm1.ann1.47SX71	E3 ubiquitin-protein ligase MARCH7-like isoform X2 [Arachis ipaensis]
arahy.Tifrunner.gnm1.ann1.6TJY4I.2	614	S	"pumilio homolog 6, chloroplastic-like [Arachis duranensis]"		arahy.Tifrunner.gnm1.ann1.G26LFA.1	222	S	two-component response regulator ARR5 [Arachis duranensis]		arahy.Tifrunner.gnm1.ann1.27HM21	121	S	"transcriptional regulator of RNA polII, SAGA, subunit [Medicago truncatula]"		arahy.Tifrunner.gnm1.ann1.48QDBJ.1	stromal cell-derived factor 2-like protein [Arachis ipaensis]
arahy.Tifrunner.gnm1.ann1.D2DMXG.1	235	T	"glyceraldehyde-3-phosphate dehydrogenase A, chloroplastic [Arachis ipaensis]"		arahy.Tifrunner.gnm1.ann1.QFH4DU.1	336	S	flocculation protein FLO11 [Arachis duranensis]		arahy.Tifrunner.gnm1.ann1.27IQR1.1	10	S	plant/F20M13-60 protein [Medicago truncatula]		arahy.Tifrunner.gnm1.ann1.48W8D3.1	protein MEI2-like 5 [Arachis ipaensis]
arahy.Tifrunner.gnm1.ann1.2022SK.2	118	T	protein transport protein SEC23 [Arachis ipaensis]		arahy.Tifrunner.gnm1.ann1.88IXK8.1	188	S	transcription initiation factor TFIID subunit 4b isoform X3 [Arachis duranensis]		arahy.Tifrunner.gnm1.ann1.2C8XNL.1	52	S	protein phosphatase 2C 29-like isoform X1 [Arachis duranensis]		arahy.Tifrunner.gnm1.ann1.492HD2.1	DUF724 domain-containing protein 3 [Vigna angularis]
arahy.Tifrunner.gnm1.ann1.BJTL8K.1	16	S	"cyclops protein, putative [Medicago truncatula]"		arahy.Tifrunner.gnm1.ann1.A42YA2.1	509	S	"RING/FYVE/PHD zinc finger protein, putative [Medicago truncatula]"		arahy.Tifrunner.gnm1.ann1.2C8XNL.1	61	S	protein phosphatase 2C 29-like isoform X1 [Arachis duranensis]		arahy.Tifrunner.gnm1.ann1.49JIZL.1	peroxisomal membrane protein PEX14 isoform X1 [Arachis ipaensis]
arahy.Tifrunner.gnm1.ann1.980X4K.2	172	S	transcription factor TGA6 isoform X1 [Arachis duranensis]		arahy.Tifrunner.gnm1.ann1.734U7E.1	717	S	protein MEI2-like 4 isoform X1 [Arachis ipaensis]		arahy.Tifrunner.gnm1.ann1.2C8XNL.1	69	S	protein phosphatase 2C 29-like isoform X1 [Arachis duranensis]		arahy.Tifrunner.gnm1.ann1.49TA12.1	actin cytoskeleton-regulatory complex protein PAN1-like isoform X1 [Arachis ipaensis]
arahy.Tifrunner.gnm1.ann1.ZLH3PG.3	787	S	agenet domain protein [Medicago truncatula]		arahy.Tifrunner.gnm1.ann1.JBBQ4L.1	77	S	methyltransferase-like protein 1 [Arachis ipaensis]		arahy.Tifrunner.gnm1.ann1.2DJ75K.2	457	S	probable protein phosphatase 2C 52 [Arachis ipaensis]		arahy.Tifrunner.gnm1.ann1.4BAF6Y.1	IST1-like protein isoform X2 [Arachis ipaensis]
arahy.Tifrunner.gnm1.ann1.89L395.3	44	S	DUF21 domain-containing protein At2g14520-like [Arachis duranensis]		arahy.Tifrunner.gnm1.ann1.ICWX02.2	143	S	FHA domain-containing protein DDL [Arachis ipaensis]		arahy.Tifrunner.gnm1.ann1.2DJ75K.2	465	S	probable protein phosphatase 2C 52 [Arachis ipaensis]		arahy.Tifrunner.gnm1.ann1.4BEG1R.1	"UPF0503 protein At3g09070, chloroplastic [Arachis duranensis]"
arahy.Tifrunner.gnm1.ann1.FAC3HW.1	322	T	eukaryotic translation initiation factor 4B2-like [Arachis duranensis]		arahy.Tifrunner.gnm1.ann1.S3Y1TX.1	61	S	multiprotein-bridging factor 1b-like [Arachis ipaensis]		arahy.Tifrunner.gnm1.ann1.2ED4HK.1	294	S	uncharacterized membrane protein At3g27390-like isoform X1 [Arachis ipaensis]		arahy.Tifrunner.gnm1.ann1.4BR56W.1	AMP deaminase-like [Arachis ipaensis]
arahy.Tifrunner.gnm1.ann1.IGE775.1	45	S	kinesin light chain [Arachis ipaensis]		arahy.Tifrunner.gnm1.ann1.B6N7K9.1	394	S	meiosis chromosome segregation family protein [Medicago truncatula]		arahy.Tifrunner.gnm1.ann1.2ED4HK.1	297	S	uncharacterized membrane protein At3g27390-like isoform X1 [Arachis ipaensis]		arahy.Tifrunner.gnm1.ann1.4CC3R7.1	protein transport protein SEC31 isoform X1 [Arachis duranensis]
arahy.Tifrunner.gnm1.ann1.HWCZ3H.2	723	S	DEAD-box ATP-dependent RNA helicase 46 isoform X1 [Arachis duranensis]		arahy.Tifrunner.gnm1.ann1.6KP4CV.1	28	S	calcium-dependent protein kinase 2-like [Arachis duranensis]		arahy.Tifrunner.gnm1.ann1.2ETJ11	390	S	"protein kinase 2B, chloroplastic-like isoform X2 [Arachis ipaensis]"		arahy.Tifrunner.gnm1.ann1.4D1XNM.2	SNARE-associated-like protein [Medicago truncatula]
arahy.Tifrunner.gnm1.ann1.MX792F.1	406	S	chitin elicitor receptor kinase 1-like [Arachis duranensis]		arahy.Tifrunner.gnm1.ann1.THB5XW.2	79	S	growth regulator-like protein [Medicago truncatula]		arahy.Tifrunner.gnm1.ann1.2FK0GQ.2	392	S	nucleotidyltransferase [Medicago truncatula]		arahy.Tifrunner.gnm1.ann1.4DJY3R.1	"keratin, type I cytoskeletal 10-like [Arachis duranensis]"
arahy.Tifrunner.gnm1.ann1.Q5B35H.1	85	S	auxin-repressed 12.5 kDa protein-like [Arachis ipaensis]		arahy.Tifrunner.gnm1.ann1.R50JGG.1	187	S	O-fucosyltransferase family protein [Arabidopsis thaliana]		arahy.Tifrunner.gnm1.ann1.2FK0GQ.2	454	S	nucleotidyltransferase [Medicago truncatula]		arahy.Tifrunner.gnm1.ann1.4E0751	sericin 1 isoform X1 [Arachis duranensis]
arahy.Tifrunner.gnm1.ann1.NZ9422.1	251	S	protein QUIRKY [Arachis duranensis]		arahy.Tifrunner.gnm1.ann1.V5GBYV.1	891	T	serine/threonine-protein kinase EDR1-like isoform X1 [Arachis ipaensis]		arahy.Tifrunner.gnm1.ann1.2FK0GQ.2	509	S	nucleotidyltransferase [Medicago truncatula]		arahy.Tifrunner.gnm1.ann1.4F0PLK.1	forkhead-associated (FHA) domain protein [Medicago truncatula]
arahy.Tifrunner.gnm1.ann1.XK3KPA.1	697	T	protein STRUBBELIG-RECEPTOR FAMILY 6 [Arachis duranensis]		arahy.Tifrunner.gnm1.ann1.NAQH5K.1	967	T	"ATPase 11, plasma membrane-type [Arachis ipaensis]"		arahy.Tifrunner.gnm1.ann1.2FK0GQ.2	1327	S	nucleotidyltransferase [Medicago truncatula]		arahy.Tifrunner.gnm1.ann1.4FD105.2	protein KAKU4-like isoform X5 [Glycine max]
arahy.Tifrunner.gnm1.ann1.90BUAB.1	122	S	mitogen-activated protein kinase kinase kinase 1-like [Arachis ipaensis]		arahy.Tifrunner.gnm1.ann1.KF5N5L.1	594	S	DUF668 family protein [Medicago truncatula]		arahy.Tifrunner.gnm1.ann1.2FK0GQ.2	1331	S	nucleotidyltransferase [Medicago truncatula]		arahy.Tifrunner.gnm1.ann1.4FT79Q.1	BEACH domain-containing protein C2 [Vigna angularis]
arahy.Tifrunner.gnm1.ann1.ZSLI3V.1	576	S	regulatory protein NPR3-like [Arachis ipaensis]		arahy.Tifrunner.gnm1.ann1.FCRD5F.1	215	S	auxin efflux carrier component 4-like isoform X1 [Arachis ipaensis]		arahy.Tifrunner.gnm1.ann1.2FK0GQ.2	1332	S	nucleotidyltransferase [Medicago truncatula]		arahy.Tifrunner.gnm1.ann1.4HQ694.2	vesicle transport protein SEC20 [Arachis ipaensis]
arahy.Tifrunner.gnm1.ann1.H4I0EH.2	388	S	TOM1-like protein 2 [Arachis ipaensis]		arahy.Tifrunner.gnm1.ann1.SN4UZH.2	45	S	reticulon-like protein B2 [Arachis duranensis]		arahy.Tifrunner.gnm1.ann1.2FK0GQ.2	1337	S	nucleotidyltransferase [Medicago truncatula]		arahy.Tifrunner.gnm1.ann1.4I03R9.2	thylakoid membrane protein slr0575 [Arachis ipaensis]
arahy.Tifrunner.gnm1.ann1.4BEG1R.1	625	S	"UPF0503 protein At3g09070, chloroplastic [Arachis duranensis]"		arahy.Tifrunner.gnm1.ann1.36PEC4.1	359	S	codeine O-demethylase-like [Arachis ipaensis]		arahy.Tifrunner.gnm1.ann1.2FK0GQ.2	1338	S	nucleotidyltransferase [Medicago truncatula]		arahy.Tifrunner.gnm1.ann1.4I8WV5.1	ninja-family protein mc410 isoform X1 [Arachis duranensis]
arahy.Tifrunner.gnm1.ann1.22W300.3	47	S	protein RCC2 homolog [Arachis ipaensis]		arahy.Tifrunner.gnm1.ann1.PP7FUY.2	108	S	"ATP-dependent Clp protease proteolytic subunit-related protein 3, chloroplastic [Arachis ipaensis]"		arahy.Tifrunner.gnm1.ann1.2FUK2Z.2	327	S	uncharacterized membrane protein At3g27390-like isoform X1 [Arachis ipaensis]		arahy.Tifrunner.gnm1.ann1.4KB8BX.2	lysine histidine transporter 2-like [Arachis ipaensis]
arahy.Tifrunner.gnm1.ann1.S2G015.1	292	S	LIMR family protein At5g01460 [Arachis ipaensis]		arahy.Tifrunner.gnm1.ann1.7M06WQ.1	283	S	protein WVD2-like 2 [Arachis ipaensis]		arahy.Tifrunner.gnm1.ann1.2FUK2Z.2	329	S	uncharacterized membrane protein At3g27390-like isoform X1 [Arachis ipaensis]		arahy.Tifrunner.gnm1.ann1.4L72G1.2	clathrin interactor EPSIN 1 [Arachis ipaensis]
arahy.Tifrunner.gnm1.ann1.GIVS0W.1	1121	S	auxilin-related protein 2 [Arachis duranensis]		arahy.Tifrunner.gnm1.ann1.73LV1S.3	220	S	probable ADP-ribosylation factor GTPase-activating protein AGD14 [Arachis duranensis]		arahy.Tifrunner.gnm1.ann1.2FUK2Z.2	331	S	uncharacterized membrane protein At3g27390-like isoform X1 [Arachis ipaensis]		arahy.Tifrunner.gnm1.ann1.4MQU62	protein STRUBBELIG-RECEPTOR FAMILY 7-like [Arachis duranensis]
arahy.Tifrunner.gnm1.ann1.RVM1DJ.1	215	S	B3 domain-containing transcription factor VRN1 isoform X1 [Arachis duranensis]		arahy.Tifrunner.gnm1.ann1.5RAP3T.1	1120	S	pre-mRNA-processing factor 17 [Arachis ipaensis]		arahy.Tifrunner.gnm1.ann1.2FUK2Z.2	534	S	uncharacterized membrane protein At3g27390-like isoform X1 [Arachis ipaensis]		arahy.Tifrunner.gnm1.ann1.4MXC2X.1	photosystem I P700 chlorophyll a apoprotein A2 (chloroplast) [Juglans regia]
arahy.Tifrunner.gnm1.ann1.K65K48.3	805	S	dynamin-related protein 3A [Arachis duranensis]		arahy.Tifrunner.gnm1.ann1.0X3R4P.1	72	S	protease Do-like 9 [Arachis duranensis]		arahy.Tifrunner.gnm1.ann1.2H5V01	164	S	ultraviolet-B receptor UVR8-like [Arachis ipaensis]		arahy.Tifrunner.gnm1.ann1.4N7RM1	protein SCAR3-like [Arachis duranensis]
arahy.Tifrunner.gnm1.ann1.LZ6UUP.2	23	S	cyclin-T1-3-like [Arachis duranensis]		arahy.Tifrunner.gnm1.ann1.J8TUD1.1	519	S	calcium-dependent protein kinase 32 [Arachis duranensis]		arahy.Tifrunner.gnm1.ann1.2H77W4.1	567	S	ethylene receptor 2 [Arachis ipaensis]		arahy.Tifrunner.gnm1.ann1.4P5PR1	nucleolin 2 isoform X1 [Glycine max]
arahy.Tifrunner.gnm1.ann1.E2WYS1.1	70	S	ATP-dependent 6-phosphofructokinase 3-like [Arachis ipaensis]		arahy.Tifrunner.gnm1.ann1.NIVA4V.1	105	S	transcription factor GTE7-like [Arachis ipaensis]		arahy.Tifrunner.gnm1.ann1.2H77W4.1	631	S	ethylene receptor 2 [Arachis ipaensis]		arahy.Tifrunner.gnm1.ann1.4P5PR2	nucleolin 2 isoform X1 [Glycine max]
arahy.Tifrunner.gnm1.ann1.MJPM8B.1	57	S	upstream activation factor subunit UAF30-like [Arachis ipaensis]		arahy.Tifrunner.gnm1.ann1.B8YDI3.1	438	T	serine/threonine-protein kinase CDL1-like [Arachis ipaensis]		arahy.Tifrunner.gnm1.ann1.2JSS8R.1	221	S	FK506-binding protein 5 [Ricinus communis]		arahy.Tifrunner.gnm1.ann1.4P5PR3	nucleolin 2 isoform X2 [Glycine max]
arahy.Tifrunner.gnm1.ann1.LGT5H6.1	774	S	tudor/PWWP/MBT superfamily protein [Medicago truncatula]		arahy.Tifrunner.gnm1.ann1.JA3EPN.1	12	S	WD repeat-containing protein 48 isoform X2 [Arachis duranensis]		arahy.Tifrunner.gnm1.ann1.2KUM51	277	S	transcription initiation factor TFIID subunit 8-like [Arachis ipaensis]		arahy.Tifrunner.gnm1.ann1.4PH81Y.1	putative RING-H2 finger protein ATL21A [Arachis ipaensis]
arahy.Tifrunner.gnm1.ann1.JN5ZJX.1	275	S	cell wall protein RBR3-like [Glycine max]		arahy.Tifrunner.gnm1.ann1.H9FQ65.1	584	S	serine/threonine-protein kinase spk-1-like [Arachis ipaensis]		arahy.Tifrunner.gnm1.ann1.2L5X7N.3	232	S	cyclin-dependent kinase G-2 [Arachis ipaensis]		arahy.Tifrunner.gnm1.ann1.4PHK1T.4	probable serine/threonine protein phosphatase 2A regulatory subunit B''delta [Arachis duranensis]
arahy.Tifrunner.gnm1.ann1.WSMZ37.1	138	S	"transmembrane protein, putative [Medicago truncatula]"		arahy.Tifrunner.gnm1.ann1.4FD105.2	414	S	protein KAKU4-like isoform X5 [Glycine max]		arahy.Tifrunner.gnm1.ann1.2L5X7N.3	239	S	cyclin-dependent kinase G-2 [Arachis ipaensis]		arahy.Tifrunner.gnm1.ann1.4PM453.4	protein MON2 homolog [Arachis ipaensis]
arahy.Tifrunner.gnm1.ann1.P6P9CF.1	3305	S	GYF domain protein [Medicago truncatula]		arahy.Tifrunner.gnm1.ann1.D98VB5.1	18	S	guanine nucleotide-binding protein subunit gamma 2 [Arachis duranensis]		arahy.Tifrunner.gnm1.ann1.2L5X7N.3	296	S	cyclin-dependent kinase G-2 [Arachis ipaensis]		arahy.Tifrunner.gnm1.ann1.4Q9CQT.1	elongation factor 1-delta-like [Arachis ipaensis]
arahy.Tifrunner.gnm1.ann1.GBN5SF.2	631	S	serine/arginine repetitive matrix protein 2-like isoform X2 [Arachis ipaensis]		arahy.Tifrunner.gnm1.ann1.CT2MPD.1	11	T	protein BRASSINAZOLE-RESISTANT 1 [Arachis ipaensis]		arahy.Tifrunner.gnm1.ann1.2L5X7N.3	310	S	cyclin-dependent kinase G-2 [Arachis ipaensis]		arahy.Tifrunner.gnm1.ann1.4RDH31	DNA-directed RNA polymerase I subunit rpa49 [Arachis ipaensis]
arahy.Tifrunner.gnm1.ann1.YL3Z6V.1	205	S	"glyceraldehyde-3-phosphate dehydrogenase GAPC2, cytosolic [Arachis duranensis]"		arahy.Tifrunner.gnm1.ann1.VTJ29R.2	32	S	COX assembly mitochondrial protein 2 homolog [Arachis ipaensis]		arahy.Tifrunner.gnm1.ann1.2L5X7N.3	729	S	cyclin-dependent kinase G-2 [Arachis ipaensis]		arahy.Tifrunner.gnm1.ann1.4RYA37.1	protein LIGHT-DEPENDENT SHORT HYPOCOTYLS 10-like [Arachis ipaensis]
arahy.Tifrunner.gnm1.ann1.L78ELK.2	667	S	epidermal growth factor receptor substrate 15 [Arachis duranensis]		arahy.Tifrunner.gnm1.ann1.T5SCHP.1	277	S	transcription initiation factor TFIID subunit 12b [Cicer arietinum]		arahy.Tifrunner.gnm1.ann1.2L9WS1	82	S	heat shock cognate 70 kDa protein 2 [Arachis ipaensis]		arahy.Tifrunner.gnm1.ann1.4SLH22	probable receptor-like protein kinase At5g18500 isoform X1 [Arachis ipaensis]
arahy.Tifrunner.gnm1.ann1.F3IAW8.2	30	S	WRKY transcription factor 1-like isoform X1 [Arachis duranensis]		arahy.Tifrunner.gnm1.ann1.46GERB.1	710	S	kinesin-like protein KCA2 [Arachis ipaensis]		arahy.Tifrunner.gnm1.ann1.2M8W81	516	S	intracellular protein transporter USO1-like protein [Medicago truncatula]		arahy.Tifrunner.gnm1.ann1.4T6VK1.1	protein OBERON 4 [Arachis ipaensis]
arahy.Tifrunner.gnm1.ann1.099TXP.1	169	S	putative E3 ubiquitin-protein ligase RF298 [Arachis ipaensis]		arahy.Tifrunner.gnm1.ann1.G5X8S7.1	154	S	putative protein TPRXL [Lupinus angustifolius]		arahy.Tifrunner.gnm1.ann1.2MH902	157	S	50S ribosomal protein L17-like [Arachis ipaensis]		arahy.Tifrunner.gnm1.ann1.4WKV82.1	"calcium sensing receptor, chloroplastic [Arachis ipaensis]"
arahy.Tifrunner.gnm1.ann1.RT0S28.1	259	S	epidermal growth factor receptor substrate 15-like 1 isoform X1 [Arachis ipaensis]		arahy.Tifrunner.gnm1.ann1.W001RR.1	39	T	AT-hook motif nuclear-localized protein 6-like [Arachis ipaensis]		arahy.Tifrunner.gnm1.ann1.2MP0U5.3	22	S	mitogen-activated protein kinase 9-like [Arachis duranensis]		arahy.Tifrunner.gnm1.ann1.4XM3SI.1	protein transport protein SEC16B homolog [Arachis ipaensis]
arahy.Tifrunner.gnm1.ann1.NAZL7K.1	370	S	protein IQ-DOMAIN 1 [Arachis duranensis]		arahy.Tifrunner.gnm1.ann1.YK7683.1	526	S	agenet domain protein [Medicago truncatula]		arahy.Tifrunner.gnm1.ann1.2MP0U5.3	193	S	mitogen-activated protein kinase 9-like [Arachis duranensis]		arahy.Tifrunner.gnm1.ann1.4Y3JN1	cytoplasmic membrane protein [Medicago truncatula]
arahy.Tifrunner.gnm1.ann1.JYM9I0.1	529	S	filaggrin [Arachis ipaensis]		arahy.Tifrunner.gnm1.ann1.BT0S58.1	125	S	probable serine/threonine-protein kinase DDB_G0282963 isoform X1 [Arachis ipaensis]		arahy.Tifrunner.gnm1.ann1.2MP0U5.3	489	S	mitogen-activated protein kinase 9-like [Arachis duranensis]		arahy.Tifrunner.gnm1.ann1.4Y5XN1	universal stress protein A-like protein [Arachis ipaensis]
arahy.Tifrunner.gnm1.ann1.00WUVK.1	429	S	plant UBX domain-containing protein 8 isoform X2 [Arachis ipaensis]		arahy.Tifrunner.gnm1.ann1.MZJQ36.2	103	S	ubiquitin carboxyl-terminal hydrolase 4 isoform X1 [Arachis ipaensis]		arahy.Tifrunner.gnm1.ann1.2N4ZV5.1	16	S	"aspartate aminotransferase, mitochondrial [Arachis ipaensis]"		arahy.Tifrunner.gnm1.ann1.4Z5MSS.1	villin-2 isoform X2 [Arachis ipaensis]
arahy.Tifrunner.gnm1.ann1.B0P3FA.3	800	S	U2 snRNP-associated SURP motif-containing protein-like [Arachis duranensis]		arahy.Tifrunner.gnm1.ann1.TGV54E.1	88	S	ABC transporter G family member 3-like [Arachis ipaensis]		arahy.Tifrunner.gnm1.ann1.2PR50U.2	971	S	filament-like plant protein 4 [Arachis duranensis]		arahy.Tifrunner.gnm1.ann1.5041YP.1	probable WRKY transcription factor 32 isoform X2 [Arachis duranensis]
arahy.Tifrunner.gnm1.ann1.0N5IZC.1	220	S	LOW QUALITY PROTEIN: transcription elongation factor B polypeptide 3-like [Arachis ipaensis]		arahy.Tifrunner.gnm1.ann1.W9U8CY.1	88	S	"glycine dehydrogenase (decarboxylating), mitochondrial [Arachis ipaensis]"		arahy.Tifrunner.gnm1.ann1.2Q5L91	16	S	DUF241 domain protein [Medicago truncatula]		arahy.Tifrunner.gnm1.ann1.50BPU8.2	DNA-directed RNA polymerase V subunit 1 isoform X2 [Arachis ipaensis]
arahy.Tifrunner.gnm1.ann1.B9AAYW.1	27	T	disease resistance protein RGA2-like [Arachis ipaensis]		arahy.Tifrunner.gnm1.ann1.DT0NNH.1	31	T	phosphoenolpyruvate carboxykinase [ATP]-like [Arachis duranensis]		arahy.Tifrunner.gnm1.ann1.2QV4RS.1	472	S	auxin efflux carrier component 4-like isoform X1 [Arachis ipaensis]		arahy.Tifrunner.gnm1.ann1.50NPJN.1	auxilin-related protein 2-like [Arachis duranensis]
arahy.Tifrunner.gnm1.ann1.4Y3JNF.1	165	S	cytoplasmic membrane protein [Medicago truncatula]		arahy.Tifrunner.gnm1.ann1.7J7UQ4.2	74	T	probable alkaline/neutral invertase D [Arachis duranensis]		arahy.Tifrunner.gnm1.ann1.2R15U2	107	S	BZIP transcription factor [Medicago truncatula]		arahy.Tifrunner.gnm1.ann1.51INSQ.1	BSD domain-containing protein 1 [Arachis ipaensis]
arahy.Tifrunner.gnm1.ann1.IX7PWC.1	6	S	ICE-like protease p20 domain protein [Medicago truncatula]		arahy.Tifrunner.gnm1.ann1.KM6PJB.1	399	T	protein DMR6-LIKE OXYGENASE 1 isoform X1 [Arachis duranensis]		arahy.Tifrunner.gnm1.ann1.2R15U2	111	S	BZIP transcription factor [Medicago truncatula]		arahy.Tifrunner.gnm1.ann1.51XJUZ.1	26S proteasome non-ATPase regulatory subunit 1 homolog A [Arachis ipaensis]
arahy.Tifrunner.gnm1.ann1.QG5LTR.1	12	S	fe-S cluster assembly protein DRE2-like isoform X2 [Arachis ipaensis]		arahy.Tifrunner.gnm1.ann1.YCI793.1	881	S	death-inducer obliterator 1 [Cajanus cajan]		arahy.Tifrunner.gnm1.ann1.2R15U2	298	S	BZIP transcription factor [Medicago truncatula]		arahy.Tifrunner.gnm1.ann1.522STQ.1	BUD13 homolog [Arachis duranensis]
arahy.Tifrunner.gnm1.ann1.UMX69X.1	694	S	ABC transporter B family member 1 [Arachis ipaensis]		arahy.Tifrunner.gnm1.ann1.XNR1AK.1	11	S	60S acidic ribosomal protein P3-like [Arachis ipaensis]		arahy.Tifrunner.gnm1.ann1.2RB1YT.1	213	S	flowering time control protein FPA [Arachis duranensis]		arahy.Tifrunner.gnm1.ann1.52W6Q5.1	ankyrin repeat domain-containing protein 13C [Arachis ipaensis]
arahy.Tifrunner.gnm1.ann1.AB1T8P.3	173	S	transcription elongation factor TFIIS [Arachis ipaensis]		arahy.Tifrunner.gnm1.ann1.CV6J43.1	218	S	MLO-like protein 6 [Arachis duranensis]		arahy.Tifrunner.gnm1.ann1.2S25M9.2	638	S	"trafficking protein particle complex subunit 11, partial [Arachis duranensis]"		arahy.Tifrunner.gnm1.ann1.53Z6YZ.1	flocculation protein FLO11-like isoform X2 [Arachis ipaensis]
arahy.Tifrunner.gnm1.ann1.D6D033.1	172	S	serine/arginine repetitive matrix protein 2 [Arachis duranensis]		arahy.Tifrunner.gnm1.ann1.IQ8CLR.2	1328	S	protein TSS [Arachis duranensis]		arahy.Tifrunner.gnm1.ann1.2S6U71	144	S	tankyrase-1 [Arachis duranensis]		arahy.Tifrunner.gnm1.ann1.549WES.1	protein tesmin/TSO1-like CXC 5 [Arachis ipaensis]
arahy.Tifrunner.gnm1.ann1.W4CT0I.1	14	T	calmodulin-binding receptor-like cytoplasmic kinase 2 [Arachis ipaensis]		arahy.Tifrunner.gnm1.ann1.FK7XM9.1	170	S	zinc finger AN1 and C2H2 domain-containing stress-associated protein 11 [Arachis ipaensis]		arahy.Tifrunner.gnm1.ann1.2TW5YI.1	15	S	squamous cell carcinoma antigen recognized by T-cells 3 [Arachis ipaensis]		arahy.Tifrunner.gnm1.ann1.54B161	boron transporter 1-like isoform X2 [Arachis ipaensis]
arahy.Tifrunner.gnm1.ann1.KDE77Y.4	236	S	pumilio homolog 2-like [Arachis ipaensis]		arahy.Tifrunner.gnm1.ann1.BFT67J.1	14	S	selenoprotein K [Arachis ipaensis]		arahy.Tifrunner.gnm1.ann1.2UVC2V.1	252	S	SAC3 family protein B isoform X1 [Arachis ipaensis]		arahy.Tifrunner.gnm1.ann1.54E44M.2	LOW QUALITY PROTEIN: probable serine/threonine-protein kinase At1g54610 [Arachis duranensis]
arahy.Tifrunner.gnm1.ann1.5DM86W.2	446	S	serine/threonine-protein kinase BLUS1-like [Arachis ipaensis]		arahy.Tifrunner.gnm1.ann1.Q9GEU7.2	904	S	retinoblastoma-related protein isoform X2 [Arachis ipaensis]		arahy.Tifrunner.gnm1.ann1.2UVC2V.1	807	S	SAC3 family protein B isoform X1 [Arachis ipaensis]		arahy.Tifrunner.gnm1.ann1.5539WM.1	mitochondrial import inner membrane translocase subunit TIM17-2-like [Arachis duranensis]
arahy.Tifrunner.gnm1.ann1.GED73I.1	182	S	inactive leucine-rich repeat receptor-like protein kinase CORYNE isoform X2 [Arachis ipaensis]		arahy.Tifrunner.gnm1.ann1.I1HQCQ.2	159	S	ABSCISIC ACID-INSENSITIVE 5-like protein 2 isoform X3 [Arachis duranensis]		arahy.Tifrunner.gnm1.ann1.2VHL38.2	85	S	transmembrane protein 33 homolog [Arachis ipaensis]		arahy.Tifrunner.gnm1.ann1.5590X2	protein FLX-like 2 [Arachis ipaensis]
arahy.Tifrunner.gnm1.ann1.8HY8BZ.1	168	T	zinc-finger homeodomain protein 1-like [Arachis duranensis]		arahy.Tifrunner.gnm1.ann1.YR6AFM.2	391	S	protein fluG [Arachis ipaensis]		arahy.Tifrunner.gnm1.ann1.2WLS1Y.1	503	S	eukaryotic translation initiation factor 4B2-like [Arachis ipaensis]		arahy.Tifrunner.gnm1.ann1.55ZT83.1	GBF-interacting protein 1-like [Arachis ipaensis]
arahy.Tifrunner.gnm1.ann1.71AIDN.2	85	S	splicing regulatory glutamine/lysine-rich protein 1 isoform X1 [Arachis ipaensis]		arahy.Tifrunner.gnm1.ann1.WG6QSW.1	106	S	nuclear pore complex protein NUP35-like [Arachis duranensis]		arahy.Tifrunner.gnm1.ann1.2WY12S.1	306	S	lysM domain receptor-like kinase 4 [Arachis ipaensis]		arahy.Tifrunner.gnm1.ann1.56NXYI.1	probable serine incorporator [Arachis ipaensis]
arahy.Tifrunner.gnm1.ann1.4RYA37.1	14	S	protein LIGHT-DEPENDENT SHORT HYPOCOTYLS 10-like [Arachis ipaensis]		arahy.Tifrunner.gnm1.ann1.JVEI5Y.1	181	T	"chlorophyll a-b binding protein CP24 10A, chloroplastic [Arachis ipaensis]"		arahy.Tifrunner.gnm1.ann1.2WY12S.1	628	S	lysM domain receptor-like kinase 4 [Arachis ipaensis]		arahy.Tifrunner.gnm1.ann1.56X5WL.2	probable leucine-rich repeat receptor-like protein kinase At5g49770 isoform X1 [Arachis ipaensis]
arahy.Tifrunner.gnm1.ann1.D0Q561.2	386	S	TOM1-like protein 2 [Arachis duranensis]		arahy.Tifrunner.gnm1.ann1.7WD3SA.2	331	S	serine/arginine-rich splicing factor SR45 [Arachis duranensis]		arahy.Tifrunner.gnm1.ann1.2X8VUU.1	241	S	hydroxyacylglutathione hydrolase cytoplasmic [Arachis ipaensis]		arahy.Tifrunner.gnm1.ann1.56Z8NU.1	"uridine kinase-like protein 2, chloroplastic [Arachis ipaensis]"
arahy.Tifrunner.gnm1.ann1.W3VJBC.1	554	S	ethylene-insensitive protein 2-like [Arachis duranensis]		arahy.Tifrunner.gnm1.ann1.PFSA3S.1	1072	S	CLIP-associated protein isoform X1 [Arachis ipaensis]		arahy.Tifrunner.gnm1.ann1.2XG0S2	262	S	NADPH--cytochrome P450 reductase 2 [Arachis duranensis]		arahy.Tifrunner.gnm1.ann1.57FWYM.1	inactive leucine-rich repeat receptor-like serine/threonine-protein kinase At1g60630 [Arachis ipaensis]
arahy.Tifrunner.gnm1.ann1.7F1JQP.1	10	S	ABA-responsive protein ABR17-like [Arachis ipaensis]		arahy.Tifrunner.gnm1.ann1.FJS2VQ.1	73	S	60S ribosomal protein L22-2-like [Arachis ipaensis]		arahy.Tifrunner.gnm1.ann1.2XR4L9.1	279	S	phosphoinositide phospholipase C 6-like isoform X1 [Arachis ipaensis]		arahy.Tifrunner.gnm1.ann1.57MKX2	"protein CHUP1, chloroplastic isoform X3 [Arachis duranensis]"
arahy.Tifrunner.gnm1.ann1.GD0F1M.1	235	S	protease Do-like 7 isoform X2 [Cucumis melo]		arahy.Tifrunner.gnm1.ann1.0DG4WJ.1	14	T	ribonuclease P protein subunit p25-like protein [Arachis ipaensis]		arahy.Tifrunner.gnm1.ann1.2YU2K1	71	S	zinc finger MYM-type protein 1-like [Arachis ipaensis]		arahy.Tifrunner.gnm1.ann1.581AX3	serine/threonine-protein phosphatase 6 regulatory subunit 3 isoform X2 [Arachis duranensis]
arahy.Tifrunner.gnm1.ann1.84QBSM.1	254	S	TMV resistance protein N-like [Arachis ipaensis]		arahy.Tifrunner.gnm1.ann1.SZL46E.1	100	S	syntaxin-71-like [Arachis ipaensis]		arahy.Tifrunner.gnm1.ann1.2YXT8K.4	104	S	mitogen-activated protein kinase kinase kinase YODA-like [Arachis duranensis]		arahy.Tifrunner.gnm1.ann1.58WU61	universal stress protein PHOS32-like [Lupinus angustifolius]
arahy.Tifrunner.gnm1.ann1.VZ1HH7.2	668	S	ABC transporter B family member 6-like [Arachis ipaensis]		arahy.Tifrunner.gnm1.ann1.V5GBYV.1	885	S	serine/threonine-protein kinase EDR1-like isoform X1 [Arachis ipaensis]		arahy.Tifrunner.gnm1.ann1.2YXT8K.4	328	S	mitogen-activated protein kinase kinase kinase YODA-like [Arachis duranensis]		arahy.Tifrunner.gnm1.ann1.58XCK1	probable LRR receptor-like serine/threonine-protein kinase At1g14390 [Arachis duranensis]
arahy.Tifrunner.gnm1.ann1.PAAG12.2	169	T	vesicle-associated membrane protein 711 [Arachis duranensis]		arahy.Tifrunner.gnm1.ann1.24XUJ9.1	185	S	plant intracellular Ras-group-related LRR protein 5-like [Arachis duranensis]		arahy.Tifrunner.gnm1.ann1.2YXT8K.4	337	S	mitogen-activated protein kinase kinase kinase YODA-like [Arachis duranensis]		arahy.Tifrunner.gnm1.ann1.59KA91.1	"ribulose bisphosphate carboxylase/oxygenase activase, chloroplastic [Arachis duranensis]"
arahy.Tifrunner.gnm1.ann1.9HQ4ZM.1	700	S	catalytic/pyridoxal phosphate-binding protein [Medicago truncatula]		arahy.Tifrunner.gnm1.ann1.6WK0GY.2	263	T	B3 domain-containing transcription repressor VAL2 isoform X1 [Arachis ipaensis]		arahy.Tifrunner.gnm1.ann1.2YXT8K.4	696	S	mitogen-activated protein kinase kinase kinase YODA-like [Arachis duranensis]		arahy.Tifrunner.gnm1.ann1.59WFQY.1	"DNA-damage-repair/toleration protein DRT111, chloroplastic [Arachis duranensis]"
arahy.Tifrunner.gnm1.ann1.JL30IG.1	291	S	Rgp1 protein [Medicago truncatula]		arahy.Tifrunner.gnm1.ann1.T5RWDG.1	31	S	"transmembrane protein, putative [Medicago truncatula]"		arahy.Tifrunner.gnm1.ann1.2Z77F1	82	S	HMG-Y-related protein A-like [Arachis ipaensis]		arahy.Tifrunner.gnm1.ann1.5A22SW.1	NPL4-like protein 2 [Arachis ipaensis]
arahy.Tifrunner.gnm1.ann1.38UXAL.1	1998	S	glutamate receptor 3.6-like [Arachis duranensis]		arahy.Tifrunner.gnm1.ann1.W13BUI.1	350	S	ATPase family AAA domain-containing protein 1 isoform X1 [Arachis ipaensis]		arahy.Tifrunner.gnm1.ann1.2Z77F1	106	S	HMG-Y-related protein A-like [Arachis ipaensis]		arahy.Tifrunner.gnm1.ann1.5A5JT2	peptidyl-prolyl cis-trans isomerase CYP95 isoform X2 [Arachis ipaensis]
arahy.Tifrunner.gnm1.ann1.MX792F.1	471	S	chitin elicitor receptor kinase 1-like [Arachis duranensis]		arahy.Tifrunner.gnm1.ann1.RHY2RN.1	94	T	AT-hook motif nuclear-localized protein 14 [Arachis ipaensis]		arahy.Tifrunner.gnm1.ann1.2Z77F1	107	S	HMG-Y-related protein A-like [Arachis ipaensis]		arahy.Tifrunner.gnm1.ann1.5A67K1	protein TSS-like [Arachis duranensis]
arahy.Tifrunner.gnm1.ann1.F381U8.1	121	S	protein PAT1 homolog 1 [Vigna radiata var. radiata]		arahy.Tifrunner.gnm1.ann1.24PQDM.2	46	S	probable protein phosphatase 2C 22 [Arachis duranensis]		arahy.Tifrunner.gnm1.ann1.2Z77F1	124	S	HMG-Y-related protein A-like [Arachis ipaensis]		arahy.Tifrunner.gnm1.ann1.5B6TP6.1	electron carrier/protein disulfide oxidoreductase [Medicago truncatula]
arahy.Tifrunner.gnm1.ann1.8U507W.1	65	S	type II inositol polyphosphate 5-phosphatase 15-like isoform X1 [Arachis ipaensis]		arahy.Tifrunner.gnm1.ann1.I1MI1E.1	383	S	serine/threonine-protein kinase CDL1 [Arachis duranensis]		arahy.Tifrunner.gnm1.ann1.2Z77F1	133	S	HMG-Y-related protein A-like [Arachis ipaensis]		arahy.Tifrunner.gnm1.ann1.5B7TYX.1	macrophage erythroblast attacher [Arachis duranensis]
arahy.Tifrunner.gnm1.ann1.HMW6IE.2	149	S	serine/arginine-rich SC35-like splicing factor SCL33 [Arachis duranensis]		arahy.Tifrunner.gnm1.ann1.XPR4K7.1	828	S	ABC transporter G family member 36-like [Arachis ipaensis]		arahy.Tifrunner.gnm1.ann1.2Z77F1	153	S	HMG-Y-related protein A-like [Arachis ipaensis]		arahy.Tifrunner.gnm1.ann1.5BR908.2	target of Myb protein 1-like [Arachis ipaensis]
arahy.Tifrunner.gnm1.ann1.GZ9SUQ.1	641	T	ABC transporter B family member 2-like [Arachis duranensis]		arahy.Tifrunner.gnm1.ann1.MLT6HR.1	36	S	octanoyltransferase [Arabidopsis thaliana]		arahy.Tifrunner.gnm1.ann1.2Z77F1	156	S	HMG-Y-related protein A-like [Arachis ipaensis]		arahy.Tifrunner.gnm1.ann1.5C4441.1	DNA-directed RNA polymerase I subunit rpa43 [Arachis ipaensis]
arahy.Tifrunner.gnm1.ann1.SQZ1L0.1	219	S	"indole-3-glycerol phosphate synthase, chloroplastic-like [Arachis ipaensis]"		arahy.Tifrunner.gnm1.ann1.W6XSXZ.1	332	S	"putative lipid phosphate phosphatase 3, chloroplastic isoform X1 [Arachis ipaensis]"		arahy.Tifrunner.gnm1.ann1.2Z77F1	178	S	HMG-Y-related protein A-like [Arachis ipaensis]		arahy.Tifrunner.gnm1.ann1.5C4SP4	tetratricopeptide repeat protein 4 homolog [Arachis ipaensis]
arahy.Tifrunner.gnm1.ann1.RIX96U.1	149	S	HMG-Y-related protein A-like [Arachis duranensis]		arahy.Tifrunner.gnm1.ann1.F9CV5S.1	588	S	villin-4-like [Arachis ipaensis]		arahy.Tifrunner.gnm1.ann1.2Z7XPV.1	31	S	DUF4228 domain protein [Medicago truncatula]		arahy.Tifrunner.gnm1.ann1.5C5N68.2	DUF2146 family protein [Medicago truncatula]
arahy.Tifrunner.gnm1.ann1.ZD0NI5.1	702	S	glycine-rich domain-containing protein 1 [Arachis duranensis]		arahy.Tifrunner.gnm1.ann1.AE9G4B.2	82	S	dystrophia myotonica WD repeat-containing protein-like [Arachis ipaensis]		arahy.Tifrunner.gnm1.ann1.2ZBI42.1	282	S	ABC transporter I family member 21 [Arachis ipaensis]		arahy.Tifrunner.gnm1.ann1.5CFI8R.1	WEB family protein At5g55860 [Arachis duranensis]
arahy.Tifrunner.gnm1.ann1.W1T8WI.1	4	S	101 kDa malaria antigen [Phoenix dactylifera]		arahy.Tifrunner.gnm1.ann1.SVA4CI.2	668	S	ethylene-insensitive protein 2-like [Arachis duranensis]		arahy.Tifrunner.gnm1.ann1.30ZN3V.2	405	S	protein MID1-COMPLEMENTING ACTIVITY 1-like [Arachis ipaensis]		arahy.Tifrunner.gnm1.ann1.5CRU8P.2	NADP-dependent glyceraldehyde-3-phosphate dehydrogenase [Arachis ipaensis]
arahy.Tifrunner.gnm1.ann1.TB6CFU.1	1058	T	myosin-17-like [Arachis ipaensis]		arahy.Tifrunner.gnm1.ann1.QLR9MG.1	65	T	probable protein phosphatase 2C 27 [Arachis ipaensis]		arahy.Tifrunner.gnm1.ann1.31BJM1	184	S	PH-response transcription factor [Arabidopsis thaliana]		arahy.Tifrunner.gnm1.ann1.5DM86W.2	serine/threonine-protein kinase BLUS1-like [Arachis ipaensis]
arahy.Tifrunner.gnm1.ann1.D93XQM.1	48	S	far upstream element-binding protein 2 isoform X2 [Arachis ipaensis]		arahy.Tifrunner.gnm1.ann1.WP52TP.1	103	S	60S acidic ribosomal protein P2-1-like [Arachis duranensis]		arahy.Tifrunner.gnm1.ann1.31BJM1	200	S	PH-response transcription factor [Arabidopsis thaliana]		arahy.Tifrunner.gnm1.ann1.5E2DVT.1	blue-light photoreceptor PHR2 [Arachis ipaensis]
arahy.Tifrunner.gnm1.ann1.4Q9CQT.1	90	T	elongation factor 1-delta-like [Arachis ipaensis]		arahy.Tifrunner.gnm1.ann1.Y758W9.1	57	S	60S ribosomal protein L29-1-like [Arachis ipaensis]		arahy.Tifrunner.gnm1.ann1.31BJM1	202	S	PH-response transcription factor [Arabidopsis thaliana]		arahy.Tifrunner.gnm1.ann1.5E2SW1	MLP-like protein 43 [Arachis duranensis]
arahy.Tifrunner.gnm1.ann1.EJC028.2	288	S	katanin p60 ATPase-containing subunit A-like 2 [Arachis duranensis]		arahy.Tifrunner.gnm1.ann1.27IQR1.1	10	S	plant/F20M13-60 protein [Medicago truncatula]		arahy.Tifrunner.gnm1.ann1.31BJM1	209	S	PH-response transcription factor [Arabidopsis thaliana]		arahy.Tifrunner.gnm1.ann1.5E7A70.1	translation initiation factor IF-2 isoform X2 [Arachis ipaensis]
arahy.Tifrunner.gnm1.ann1.PUEI6W.1	725	S	serine/threonine-protein kinase CTR1 [Arachis ipaensis]		arahy.Tifrunner.gnm1.ann1.0CFS5U.2	96	S	DEAD-box ATP-dependent RNA helicase 20-like [Arachis duranensis]		arahy.Tifrunner.gnm1.ann1.32CIDN.1	399	S	protein IQ-DOMAIN 1-like [Arachis ipaensis]		arahy.Tifrunner.gnm1.ann1.5EYH11	aquaporin PIP2-7-like [Arachis ipaensis]
arahy.Tifrunner.gnm1.ann1.1U7IT4.1	351	S	J domain-containing protein required for chloroplast accumulation response 1 [Arachis duranensis]		arahy.Tifrunner.gnm1.ann1.XC2T0Q.1	194	S	protein WVD2-like 4 [Arachis ipaensis]		arahy.Tifrunner.gnm1.ann1.32G3LI.2	45	S	E3 ubiquitin-protein ligase At3g02290 [Arachis duranensis]		arahy.Tifrunner.gnm1.ann1.5FGK1K.2	WD repeat-containing protein 44 [Arachis ipaensis]
arahy.Tifrunner.gnm1.ann1.M0HELP.1	10	S	13-hydroxylupanine O-tigloyltransferase-like [Arachis ipaensis]		arahy.Tifrunner.gnm1.ann1.B8KV7F.1	1402	S	protein transport protein SEC16A homolog isoform X1 [Arachis ipaensis]		arahy.Tifrunner.gnm1.ann1.32PFV1	480	S	apoptosis inhibitor 5 [Arachis ipaensis]		arahy.Tifrunner.gnm1.ann1.5FS3JW.2	serine/threonine-protein kinase HT1-like [Arachis ipaensis]
arahy.Tifrunner.gnm1.ann1.5RAP3T.1	1195	S	pre-mRNA-processing factor 17 [Arachis ipaensis]		arahy.Tifrunner.gnm1.ann1.M21JET.2	122	S	dr1-associated corepressor homolog [Arachis ipaensis]		arahy.Tifrunner.gnm1.ann1.338AY0.2	100	S	CW-type zinc-finger protein [Medicago truncatula]		arahy.Tifrunner.gnm1.ann1.5GPW51	"transketolase, chloroplastic [Arachis duranensis]"
arahy.Tifrunner.gnm1.ann1.L1PMVE.1	1002	S	BAH domain-containing protein [Medicago truncatula]		arahy.Tifrunner.gnm1.ann1.YR6PCG.1	69	S	"hydroxyproline-rich protein, putative [Medicago truncatula]"		arahy.Tifrunner.gnm1.ann1.338AY0.2	1458	S	CW-type zinc-finger protein [Medicago truncatula]		arahy.Tifrunner.gnm1.ann1.5GV92J.2	protein PHR1-LIKE 1-like isoform X2 [Arachis ipaensis]
arahy.Tifrunner.gnm1.ann1.MSPK9F.2	396	S	zinc finger CCCH domain-containing protein ZFN-like [Arachis ipaensis]		arahy.Tifrunner.gnm1.ann1.B2KMHD.2	541	S	LOW QUALITY PROTEIN: inducible nitrate reductase [NADH] 2 [Arachis ipaensis]		arahy.Tifrunner.gnm1.ann1.33GLRJ.1	87	S	reticulon-like protein B5 [Arachis ipaensis]		arahy.Tifrunner.gnm1.ann1.5H0MDK.1	nicotinate phosphoribosyltransferase-like [Arachis duranensis]
arahy.Tifrunner.gnm1.ann1.U4VKB6.1	16	S	KH domain-containing protein At3g08620 [Arachis ipaensis]		arahy.Tifrunner.gnm1.ann1.8ME29W.2	416	S	calcium-dependent protein kinase-like [Arachis ipaensis]		arahy.Tifrunner.gnm1.ann1.33GLRJ.1	89	S	reticulon-like protein B5 [Arachis ipaensis]		arahy.Tifrunner.gnm1.ann1.5HY1FK.1	rhomboid-like protein 20 isoform X2 [Arachis ipaensis]
arahy.Tifrunner.gnm1.ann1.EY3S6Y.3	403	S	serine/threonine-protein kinase CDL1 [Arachis ipaensis]		arahy.Tifrunner.gnm1.ann1.BEGE34.2	231	S	transmembrane protein [Arabidopsis thaliana]		arahy.Tifrunner.gnm1.ann1.33GLRJ.1	97	S	reticulon-like protein B5 [Arachis ipaensis]		arahy.Tifrunner.gnm1.ann1.5JAI43	serine/threonine-protein phosphatase 7 [Arachis ipaensis]
arahy.Tifrunner.gnm1.ann1.93GJX5.3	239	S	cyclin-dependent kinase G-2 [Arachis duranensis]		arahy.Tifrunner.gnm1.ann1.5RAP3T.1	1129	S	pre-mRNA-processing factor 17 [Arachis ipaensis]		arahy.Tifrunner.gnm1.ann1.33JI2U.1	67	S	MYB family transcription factor [Medicago truncatula]		arahy.Tifrunner.gnm1.ann1.5JP303.2	DEAD-box ATP-dependent RNA helicase 37-like [Arachis ipaensis]
arahy.Tifrunner.gnm1.ann1.K60PJ1.1	43	T	actin-3 [Arachis ipaensis]		arahy.Tifrunner.gnm1.ann1.X43XEU.1	47	T	PPR containing protein [Arabidopsis thaliana]		arahy.Tifrunner.gnm1.ann1.33UQPP.2	478	S	"probable aminopyrimidine aminohydrolase, mitochondrial [Arachis duranensis]"		arahy.Tifrunner.gnm1.ann1.5KAB81	"receptor homology region, transmembrane domain- and RING domain-containing protein 2 [Arachis ipaensis]"
arahy.Tifrunner.gnm1.ann1.7WKR24.1	621	S	eukaryotic translation initiation factor 4G-like isoform X1 [Arachis duranensis]		arahy.Tifrunner.gnm1.ann1.0F111G.1	3	S	abscisic acid receptor PYL4-like [Arachis duranensis]		arahy.Tifrunner.gnm1.ann1.34H521	215	S	mannose-1-phosphate guanyltransferase alpha-like [Arachis ipaensis]		arahy.Tifrunner.gnm1.ann1.5KWE5R.1	"putative quinone-oxidoreductase homolog, chloroplastic [Arachis ipaensis]"
arahy.Tifrunner.gnm1.ann1.J18WU7.2	699	T	bromodomain testis-specific protein-like [Arachis duranensis]		arahy.Tifrunner.gnm1.ann1.0WKN8B.1	269	S	translation initiation factor IF-2 isoform X2 [Arachis ipaensis]		arahy.Tifrunner.gnm1.ann1.34H521	216	S	mannose-1-phosphate guanyltransferase alpha-like [Arachis ipaensis]		arahy.Tifrunner.gnm1.ann1.5NE8A1	LOW QUALITY PROTEIN: CCR4-NOT transcription complex subunit 1 [Arachis duranensis]
arahy.Tifrunner.gnm1.ann1.23PF6N.2	372	S	"serine hydroxymethyltransferase, mitochondrial [Arachis duranensis]"		arahy.Tifrunner.gnm1.ann1.PLG8VX.1	11	S	cyclase-associated protein 1-like [Arachis duranensis]		arahy.Tifrunner.gnm1.ann1.34WN1K.1	64	S	syntaxin-22-like [Arachis duranensis]		arahy.Tifrunner.gnm1.ann1.5NH7J1	vitellogenin-2-like isoform X2 [Ananas comosus]
arahy.Tifrunner.gnm1.ann1.W02GTP.1	53	S	"nucleic acid-binding, OB-fold-like protein [Medicago truncatula]"		arahy.Tifrunner.gnm1.ann1.RD60QW.1	1079	S	LRR receptor-like serine/threonine-protein kinase RCH1 [Arachis duranensis]		arahy.Tifrunner.gnm1.ann1.350VGV.1	307	S	aquaporin NIP6-1 [Arachis ipaensis]		arahy.Tifrunner.gnm1.ann1.5NTT5I.1	pyruvate decarboxylase 2-like [Arachis duranensis]
arahy.Tifrunner.gnm1.ann1.2Z77FC.1	106	S	HMG-Y-related protein A-like [Arachis ipaensis]		arahy.Tifrunner.gnm1.ann1.Y5NR52.2	295	Y	dual specificity tyrosine-phosphorylation-regulated kinase 1B [Arachis ipaensis]		arahy.Tifrunner.gnm1.ann1.36HDX1	87	S	glutaredoxin (GRX) family protein [Medicago truncatula]		arahy.Tifrunner.gnm1.ann1.5P4QK1	"protein SUPPRESSOR OF GENE SILENCING 3 homolog, partial [Arachis duranensis]"
arahy.Tifrunner.gnm1.ann1.3J71J7.1	61	S	protein SAD1/UNC-84 domain protein 1-like [Arachis ipaensis]		arahy.Tifrunner.gnm1.ann1.BH8PB4.2	164	S	"protein VASCULAR ASSOCIATED DEATH 1, chloroplastic isoform X1 [Arachis ipaensis]"		arahy.Tifrunner.gnm1.ann1.36PEC4.1	359	S	codeine O-demethylase-like [Arachis ipaensis]		arahy.Tifrunner.gnm1.ann1.5PGU74.2	"glyceraldehyde-3-phosphate dehydrogenase GAPCP2, chloroplastic [Arachis duranensis]"
arahy.Tifrunner.gnm1.ann1.X3YRCT.2	21	S	eukaryotic translation initiation factor 4G-like isoform X1 [Arachis duranensis]		arahy.Tifrunner.gnm1.ann1.Z7C896.1	166	S	mitogen-activated protein kinase kinase kinase YODA-like [Arachis duranensis]		arahy.Tifrunner.gnm1.ann1.38CFQ6.2	720	S	villin-1 [Arachis duranensis]		arahy.Tifrunner.gnm1.ann1.5Q7AH1	translation machinery-associated protein 22 [Arachis duranensis]
arahy.Tifrunner.gnm1.ann1.UE8RN5.1	60	S	protein phosphatase inhibitor 2-like [Arachis ipaensis]		arahy.Tifrunner.gnm1.ann1.E1EB00.1	195	S	ENHANCER OF AG-4 protein 2 [Arachis duranensis]		arahy.Tifrunner.gnm1.ann1.38CFQ6.2	760	S	villin-1 [Arachis duranensis]		arahy.Tifrunner.gnm1.ann1.5QP756.2	BTB/POZ domain-containing protein At1g63850 [Arachis ipaensis]
arahy.Tifrunner.gnm1.ann1.R6GQUS.2	496	S	GBF-interacting protein 1-like isoform X2 [Cajanus cajan]		arahy.Tifrunner.gnm1.ann1.YCI793.1	147	S	death-inducer obliterator 1 [Cajanus cajan]		arahy.Tifrunner.gnm1.ann1.38CFQ6.2	764	S	villin-1 [Arachis duranensis]		arahy.Tifrunner.gnm1.ann1.5QY6DW.1	non-specific phospholipase C6 [Arachis duranensis]
arahy.Tifrunner.gnm1.ann1.L4IVZW.1	10	S	alpha-mannosidase 2 [Arachis duranensis]		arahy.Tifrunner.gnm1.ann1.0NLM3R.1	15	S	zinc finger CCCH domain-containing protein 37-like isoform X1 [Arachis duranensis]		arahy.Tifrunner.gnm1.ann1.38CFQ6.2	771	S	villin-1 [Arachis duranensis]		arahy.Tifrunner.gnm1.ann1.5RAP3T.1	pre-mRNA-processing factor 17 [Arachis ipaensis]
arahy.Tifrunner.gnm1.ann1.25IG2V.1	285	T	rho GTPase-activating protein gacF-like [Arachis duranensis]		arahy.Tifrunner.gnm1.ann1.XC1VLW.1	18	S	"glucose-6-phosphate 1-dehydrogenase, cytoplasmic isoform [Arachis duranensis]"		arahy.Tifrunner.gnm1.ann1.38UXAL.1	972	S	glutamate receptor 3.6-like [Arachis duranensis]		arahy.Tifrunner.gnm1.ann1.5RM0K9.1	BSD domain protein [Medicago truncatula]
arahy.Tifrunner.gnm1.ann1.P7ITSZ.1	22	S	costars family protein-like [Arachis ipaensis]		arahy.Tifrunner.gnm1.ann1.T9BXJY.1	313	S	UDP-galactose transporter 2-like [Arachis duranensis]		arahy.Tifrunner.gnm1.ann1.38UXAL.1	1999	S	glutamate receptor 3.6-like [Arachis duranensis]		arahy.Tifrunner.gnm1.ann1.5SR8F4	E3 ubiquitin-protein ligase UPL3 isoform X3 [Arachis duranensis]
arahy.Tifrunner.gnm1.ann1.23ZYRY.3	84	S	"calcium-transporting ATPase 9, plasma membrane-type-like [Arachis duranensis]"		arahy.Tifrunner.gnm1.ann1.W4Y87I.1	718	S	protein STRUBBELIG-RECEPTOR FAMILY 8 [Arachis ipaensis]		arahy.Tifrunner.gnm1.ann1.38UXAL.2	976	S	glutamate receptor 3.6-like [Arachis duranensis]		arahy.Tifrunner.gnm1.ann1.5U1FHR.1	"ATP-dependent Clp protease adapter protein CLPS1, chloroplastic-like [Arachis duranensis]"
arahy.Tifrunner.gnm1.ann1.G6LTG1.2	723	T	probable leucine-rich repeat receptor-like protein kinase At5g49770 [Arachis ipaensis]		arahy.Tifrunner.gnm1.ann1.I5I5B9.1	879	S	serine/threonine-protein kinase EDR1-like [Arachis duranensis]		arahy.Tifrunner.gnm1.ann1.39P5N1	14	S	187-kDa microtubule-associated protein AIR9 [Arachis duranensis]		arahy.Tifrunner.gnm1.ann1.5V04Y1	60S acidic ribosomal protein P1 [Arachis ipaensis]
arahy.Tifrunner.gnm1.ann1.AZ4556.2	74	S	protein gar2 [Arachis ipaensis]		arahy.Tifrunner.gnm1.ann1.BD8AAL.1	370	S	"RING/FYVE/PHD zinc finger protein, putative [Medicago truncatula]"		arahy.Tifrunner.gnm1.ann1.39P5N1	29	S	187-kDa microtubule-associated protein AIR9 [Arachis duranensis]		arahy.Tifrunner.gnm1.ann1.5V3X3X.2	LOW QUALITY PROTEIN: topless-related protein 4-like [Arachis ipaensis]
arahy.Tifrunner.gnm1.ann1.V4RJ43.1	277	T	ubiquitin-activating enzyme E1 2-like [Arachis ipaensis]		arahy.Tifrunner.gnm1.ann1.9W5UDX.2	15	S	RNA polymerase II transcriptional coactivator KIWI-like [Arachis ipaensis]		arahy.Tifrunner.gnm1.ann1.39P5N1	137	S	187-kDa microtubule-associated protein AIR9 [Arachis duranensis]		arahy.Tifrunner.gnm1.ann1.5V604V.1	protein starmaker-like [Cajanus cajan]
arahy.Tifrunner.gnm1.ann1.VDB3CB.1	531	S	CW-type zinc-finger protein [Medicago truncatula]		arahy.Tifrunner.gnm1.ann1.V8BLVD.1	431	S	DUF688 family protein [Medicago truncatula]		arahy.Tifrunner.gnm1.ann1.39XKQR.1	739	S	mediator of RNA polymerase II transcription subunit 14 [Arachis ipaensis]		arahy.Tifrunner.gnm1.ann1.5W2WC3.1	kinesin-13A-like [Arachis ipaensis]
arahy.Tifrunner.gnm1.ann1.4BR56W.1	157	S	AMP deaminase-like [Arachis ipaensis]		arahy.Tifrunner.gnm1.ann1.P7Z227.1	347	S	probable transcription factor KAN2 [Arachis duranensis]		arahy.Tifrunner.gnm1.ann1.39XKQR.1	808	S	mediator of RNA polymerase II transcription subunit 14 [Arachis ipaensis]		arahy.Tifrunner.gnm1.ann1.5Z7E3S.2	proline-rich receptor-like protein kinase PERK9 [Arachis ipaensis]
arahy.Tifrunner.gnm1.ann1.RT0S28.1	277	S	epidermal growth factor receptor substrate 15-like 1 isoform X1 [Arachis ipaensis]		arahy.Tifrunner.gnm1.ann1.GBJ0AR.1	63	T	putative potassium transporter 12 [Arachis duranensis]		arahy.Tifrunner.gnm1.ann1.3A3GYI.1	126	S	senescence regulator [Medicago truncatula]		arahy.Tifrunner.gnm1.ann1.5ZE3N1.1	vitellogenin-A2 isoform X2 [Arachis ipaensis]
arahy.Tifrunner.gnm1.ann1.4E075G.1	726	S	sericin 1 isoform X1 [Arachis duranensis]		arahy.Tifrunner.gnm1.ann1.T45VHI.3	330	S	SNARE-interacting protein KEULE-like [Arachis duranensis]		arahy.Tifrunner.gnm1.ann1.3B9L35.1	42	S	"transmembrane protein, putative [Medicago truncatula]"		arahy.Tifrunner.gnm1.ann1.5ZZ6F4.2	E3 ubiquitin-protein ligase Hakai [Arachis duranensis]
arahy.Tifrunner.gnm1.ann1.HMW6IE.2	138	S	serine/arginine-rich SC35-like splicing factor SCL33 [Arachis duranensis]		arahy.Tifrunner.gnm1.ann1.1G1J9V.1	81	T	dormancy-associated protein homolog 3-like isoform X2 [Cajanus cajan]		arahy.Tifrunner.gnm1.ann1.3B9L35.1	76	S	"transmembrane protein, putative [Medicago truncatula]"		arahy.Tifrunner.gnm1.ann1.612ZK0.1	DExH-box ATP-dependent RNA helicase DExH10 [Arachis ipaensis]
arahy.Tifrunner.gnm1.ann1.132VHE.2	89	S	"phosphatidylinositol 3,4,5-trisphosphate 3-phosphatase and protein-tyrosine-phosphatase PTEN2A-like[Arachis ipaensis]"		arahy.Tifrunner.gnm1.ann1.U2SLBT.1	96	S	probable ADP-ribosylation factor GTPase-activating protein AGD8 [Arachis ipaensis]		arahy.Tifrunner.gnm1.ann1.3B9L35.1	78	S	"transmembrane protein, putative [Medicago truncatula]"		arahy.Tifrunner.gnm1.ann1.61N80Q.1	SART-1 family protein DOT2 [Arachis ipaensis]
arahy.Tifrunner.gnm1.ann1.PFNK2V.2	950	S	eukaryotic translation initiation factor 3 subunit A [Arachis ipaensis]		arahy.Tifrunner.gnm1.ann1.W35S2M.2	129	S	AMP deaminase isoform X1 [Arachis ipaensis]		arahy.Tifrunner.gnm1.ann1.3BTA48.1	22	S	late embryogenesis abundant protein [Medicago truncatula]		arahy.Tifrunner.gnm1.ann1.625701	"salt-inducible protein, putative [Medicago truncatula]"
arahy.Tifrunner.gnm1.ann1.XPR4K7.1	822	S	ABC transporter G family member 36-like [Arachis ipaensis]		arahy.Tifrunner.gnm1.ann1.E56BAP.1	440	T	serine/threonine-protein kinase STY8-like isoform X1 [Arachis duranensis]		arahy.Tifrunner.gnm1.ann1.3BTA48.1	33	S	late embryogenesis abundant protein [Medicago truncatula]		arahy.Tifrunner.gnm1.ann1.62AJ61	protein NLP6-like isoform X1 [Arachis ipaensis]
arahy.Tifrunner.gnm1.ann1.W1T8WI.1	15	S	101 kDa malaria antigen [Phoenix dactylifera]		arahy.Tifrunner.gnm1.ann1.H5PABG.2	156	S	AMSH-like ubiquitin thioesterase 3 [Arachis ipaensis]		arahy.Tifrunner.gnm1.ann1.3BTA48.1	57	S	late embryogenesis abundant protein [Medicago truncatula]		arahy.Tifrunner.gnm1.ann1.62L32R.1	polyadenylate-binding protein-interacting protein 3-like isoform X2 [Arachis ipaensis]
arahy.Tifrunner.gnm1.ann1.632UCW.1	184	S	pheromone receptor-like protein [Medicago truncatula]		arahy.Tifrunner.gnm1.ann1.R6GQUS.2	270	S	GBF-interacting protein 1-like isoform X2 [Cajanus cajan]		arahy.Tifrunner.gnm1.ann1.3BTA48.1	61	S	late embryogenesis abundant protein [Medicago truncatula]		arahy.Tifrunner.gnm1.ann1.632UCW.1	pheromone receptor-like protein [Medicago truncatula]
arahy.Tifrunner.gnm1.ann1.H0C62V.4	631	S	zinc finger CCCH domain-containing protein 18-like [Arachis duranensis]		arahy.Tifrunner.gnm1.ann1.V20ZHW.1	554	S	protein NTM1-like 9 [Arachis duranensis]		arahy.Tifrunner.gnm1.ann1.3D2TC1.2	80	S	serine/threonine-protein kinase D6PKL1 [Arachis ipaensis]		arahy.Tifrunner.gnm1.ann1.63GP52.1	"chlorophyll a-b binding protein CP29.3, chloroplastic [Arachis ipaensis]"
arahy.Tifrunner.gnm1.ann1.NQHE67.1	32	S	probable WRKY transcription factor 61 [Arachis ipaensis]		arahy.Tifrunner.gnm1.ann1.WJT401.2	222	S	BEL1-like homeodomain protein 7 [Arachis ipaensis]		arahy.Tifrunner.gnm1.ann1.3EVA1Y.1	116	S	spermine synthase isoform X1 [Arachis duranensis]		arahy.Tifrunner.gnm1.ann1.63P8XR.1	nuclear pore complex protein NUP50A [Arachis ipaensis]
arahy.Tifrunner.gnm1.ann1.H8Y7P7.2	543	S	serine/arginine-rich splicing factor 4-like [Arachis duranensis]		arahy.Tifrunner.gnm1.ann1.FCRD5F.1	209	S	auxin efflux carrier component 4-like isoform X1 [Arachis ipaensis]		arahy.Tifrunner.gnm1.ann1.3EVX71	142	S	"peptidoglycan-binding LysM domain protein, putative [Medicago truncatula]"		arahy.Tifrunner.gnm1.ann1.63W3DY.2	"peptidyl-prolyl cis-trans isomerase FKBP20-2, chloroplastic [Arachis duranensis]"
arahy.Tifrunner.gnm1.ann1.D2ALS7.1	66	S	serine/threonine-protein kinase HT1-like [Arachis ipaensis]		arahy.Tifrunner.gnm1.ann1.7PY5NM.1	175	S	ubiquitin-protein ligase [Medicago truncatula]		arahy.Tifrunner.gnm1.ann1.3EVX71	143	S	"peptidoglycan-binding LysM domain protein, putative [Medicago truncatula]"		arahy.Tifrunner.gnm1.ann1.63XCF8.2	heterogeneous nuclear ribonucleoprotein 1-like isoform X1 [Arachis ipaensis]
arahy.Tifrunner.gnm1.ann1.4DJY3R.1	96	S	"keratin, type I cytoskeletal 10-like [Arachis duranensis]"		arahy.Tifrunner.gnm1.ann1.0V2EN1.2	107	S	fimbrin-5-like [Arachis ipaensis]		arahy.Tifrunner.gnm1.ann1.3EVX71	260	S	"peptidoglycan-binding LysM domain protein, putative [Medicago truncatula]"		arahy.Tifrunner.gnm1.ann1.63Z2XK.2	protein RER1A-like [Arachis duranensis]
arahy.Tifrunner.gnm1.ann1.IKZ5YQ.1	95	S	chitin elicitor receptor kinase 1-like [Arachis ipaensis]		arahy.Tifrunner.gnm1.ann1.H1KJG3.1	219	S	polyadenylation and cleavage factor homolog 4-like [Glycine max]		arahy.Tifrunner.gnm1.ann1.3GAL91	280	S	"(R,S)-reticuline 7-O-methyltransferase-like [Arachis duranensis]"		arahy.Tifrunner.gnm1.ann1.6441EL.1	translation machinery associated TMA7 protein [Medicago truncatula]
arahy.Tifrunner.gnm1.ann1.V2HZSR.1	172	T	eukaryotic translation initiation factor 5B [Arachis duranensis]		arahy.Tifrunner.gnm1.ann1.6L1LF5.1	204	S	FHA domain-containing protein FHA2 [Arachis duranensis]		arahy.Tifrunner.gnm1.ann1.3HMZ7U.1	53	S	auxilin-related protein 2-like isoform X1 [Arachis ipaensis]		arahy.Tifrunner.gnm1.ann1.648X0I.1	protein DETOXIFICATION 40-like [Arachis ipaensis]
arahy.Tifrunner.gnm1.ann1.9RBM2G.1	339	S	RING-H2 finger protein ATL46 [Arachis duranensis]		arahy.Tifrunner.gnm1.ann1.ATF0F7.2	55	S	J domain-containing protein required for chloroplast accumulation response 1 [Arachis ipaensis]		arahy.Tifrunner.gnm1.ann1.3HMZ7U.1	80	S	auxilin-related protein 2-like isoform X1 [Arachis ipaensis]		arahy.Tifrunner.gnm1.ann1.649GVM.1	HMG-Y-related protein A-like [Arachis ipaensis]
arahy.Tifrunner.gnm1.ann1.U64MAA.1	8	T	TPR repeat protein [Medicago truncatula]		arahy.Tifrunner.gnm1.ann1.WY8BRN.1	58	S	XS domain protein [Medicago truncatula]		arahy.Tifrunner.gnm1.ann1.3HMZ7U.1	334	S	auxilin-related protein 2-like isoform X1 [Arachis ipaensis]		arahy.Tifrunner.gnm1.ann1.649J27.1	epidermal growth factor receptor substrate 15-like 1 isoform X1 [Arachis ipaensis]
arahy.Tifrunner.gnm1.ann1.NSZL7L.1	125	T	sorting nexin 2B [Arachis ipaensis]		arahy.Tifrunner.gnm1.ann1.A2Z0UC.2	577	S	phototropin-2 [Arachis ipaensis]		arahy.Tifrunner.gnm1.ann1.3HMZ7U.1	462	S	auxilin-related protein 2-like isoform X1 [Arachis ipaensis]		arahy.Tifrunner.gnm1.ann1.64EDPK.1	"probable receptor-like serine/threonine-protein kinase At5g57670, partial [Arachis duranensis]"
arahy.Tifrunner.gnm1.ann1.5041YP.1	351	S	probable WRKY transcription factor 32 isoform X2 [Arachis duranensis]		arahy.Tifrunner.gnm1.ann1.XQ9TSC.3	407	S	ultraviolet-B receptor UVR8 [Arachis duranensis]		arahy.Tifrunner.gnm1.ann1.3HMZ7U.1	757	S	auxilin-related protein 2-like isoform X1 [Arachis ipaensis]		arahy.Tifrunner.gnm1.ann1.64XDM2.1	nuclear pore complex protein NUP35 isoform X2 [Arachis duranensis]
arahy.Tifrunner.gnm1.ann1.JA3EPN.1	398	S	WD repeat-containing protein 48 isoform X2 [Arachis duranensis]		arahy.Tifrunner.gnm1.ann1.X3YRCT.2	146	T	eukaryotic translation initiation factor 4G-like isoform X1 [Arachis duranensis]		arahy.Tifrunner.gnm1.ann1.3I6JR3.1	14	S	conserved oligomeric Golgi complex subunit 5 [Arachis duranensis]		arahy.Tifrunner.gnm1.ann1.653NH4.2	autophagy-related protein 18a-like [Arachis ipaensis]
arahy.Tifrunner.gnm1.ann1.JN5ZJX.1	49	T	cell wall protein RBR3-like [Glycine max]		arahy.Tifrunner.gnm1.ann1.VDB3CB.1	919	S	CW-type zinc-finger protein [Medicago truncatula]		arahy.Tifrunner.gnm1.ann1.3I6JR3.1	23	S	conserved oligomeric Golgi complex subunit 5 [Arachis duranensis]		arahy.Tifrunner.gnm1.ann1.65X03I.2
arahy.Tifrunner.gnm1.ann1.H1QDLV.2	62	S	pantothenate kinase 2-like [Arachis ipaensis]		arahy.Tifrunner.gnm1.ann1.NEIN3W.1	375	S	mediator of RNA polymerase II transcription subunit 15 isoform X1 [Arachis duranensis]		arahy.Tifrunner.gnm1.ann1.3I6JR3.1	139	S	conserved oligomeric Golgi complex subunit 5 [Arachis duranensis]		arahy.Tifrunner.gnm1.ann1.66KNZL.1	serine/threonine-protein phosphatase BSL3 [Arachis ipaensis]
arahy.Tifrunner.gnm1.ann1.1SB772.3	58	S	sterol 3-beta-glucosyltransferase UGT80B1 [Arachis ipaensis]		arahy.Tifrunner.gnm1.ann1.P96X61.2	371	S	"fructose-bisphosphate aldolase 1, chloroplastic [Arachis duranensis]"		arahy.Tifrunner.gnm1.ann1.3IB4N1	322	S	putative mediator of RNA polymerase II transcription subunit 12 [Arachis ipaensis]		arahy.Tifrunner.gnm1.ann1.66PPWS.1	nematode resistance protein-like HSPRO2 [Arachis ipaensis]
arahy.Tifrunner.gnm1.ann1.5F9GBV.2	199	T	transcription factor HBP-1b(c38) isoform X1 [Arachis ipaensis]		arahy.Tifrunner.gnm1.ann1.45L0XA.3	337	S	pre-mRNA-splicing factor 38B [Arachis duranensis]		arahy.Tifrunner.gnm1.ann1.3J4V91	477	S	trafficking protein particle complex II-specific subunit 130 homolog [Arachis ipaensis]		arahy.Tifrunner.gnm1.ann1.66S7FV.1	plasma membrane ATPase 4 [Arachis ipaensis]
arahy.Tifrunner.gnm1.ann1.T9ZPF9.1	56	T	DUF1685 family protein [Medicago truncatula]		arahy.Tifrunner.gnm1.ann1.MCCA8X.1	341	S	activating signal cointegrator 1-like isoform X1 [Glycine max]		arahy.Tifrunner.gnm1.ann1.3J4V91	519	S	trafficking protein particle complex II-specific subunit 130 homolog [Arachis ipaensis]		arahy.Tifrunner.gnm1.ann1.67E0CQ.1	glutathione S-transferase F9-like [Arachis ipaensis]
arahy.Tifrunner.gnm1.ann1.U9U8W4.1	238	T	vitellogenin-like [Nelumbo nucifera]		arahy.Tifrunner.gnm1.ann1.3M73WP.1	357	S	transcription factor RF2a-like [Cajanus cajan]		arahy.Tifrunner.gnm1.ann1.3J71J7.1	58	S	protein SAD1/UNC-84 domain protein 1-like [Arachis ipaensis]		arahy.Tifrunner.gnm1.ann1.67HF21.2	UDP-galactose transporter 2-like [Arachis ipaensis]
arahy.Tifrunner.gnm1.ann1.WSMZ37.1	61	S	"transmembrane protein, putative [Medicago truncatula]"		arahy.Tifrunner.gnm1.ann1.YX753W.1	489	S	colon cancer-associated Mic1-like protein [Medicago truncatula]		arahy.Tifrunner.gnm1.ann1.3J71J7.1	61	S	protein SAD1/UNC-84 domain protein 1-like [Arachis ipaensis]		arahy.Tifrunner.gnm1.ann1.67PT2S.1	trihelix transcription factor ASIL1-like [Arachis duranensis]
arahy.Tifrunner.gnm1.ann1.WHQX43.2	150	T	AT-hook motif nuclear-localized protein 5 isoform X3 [Arachis ipaensis]		arahy.Tifrunner.gnm1.ann1.TU7XRI.1	28	S	universal stress protein PHOS32-like [Lupinus angustifolius]		arahy.Tifrunner.gnm1.ann1.3J71J7.1	72	S	protein SAD1/UNC-84 domain protein 1-like [Arachis ipaensis]		arahy.Tifrunner.gnm1.ann1.67TC14.1	acyl-CoA thioesterase [Medicago truncatula]
arahy.Tifrunner.gnm1.ann1.LP1JBF.1	182	S	glycine-rich protein 2 [Arachis ipaensis]		arahy.Tifrunner.gnm1.ann1.CME6C7.1	167	S	protein phosphatase 2C 32 [Arachis duranensis]		arahy.Tifrunner.gnm1.ann1.3J71J7.1	82	S	protein SAD1/UNC-84 domain protein 1-like [Arachis ipaensis]		arahy.Tifrunner.gnm1.ann1.68AXR1	mitogen-activated protein kinase 9-like [Arachis ipaensis]
arahy.Tifrunner.gnm1.ann1.IW12TT.1	250	S	E3 ubiquitin-protein ligase MARCH7-like [Lupinus angustifolius]		arahy.Tifrunner.gnm1.ann1.A1RQ10.3	196	S	heterogeneous nuclear ribonucleoprotein 1-like [Arachis ipaensis]		arahy.Tifrunner.gnm1.ann1.3J71J7.1	88	S	protein SAD1/UNC-84 domain protein 1-like [Arachis ipaensis]		arahy.Tifrunner.gnm1.ann1.68AZQV.2	protein BTR1 [Arachis ipaensis]
arahy.Tifrunner.gnm1.ann1.YJRC23.1	130	S	bromodomain-containing protein 4 [Arachis duranensis]		arahy.Tifrunner.gnm1.ann1.QD99PL.1	45	S	probable ADP-ribosylation factor GTPase-activating protein AGD5 [Arachis duranensis]		arahy.Tifrunner.gnm1.ann1.3KND22	553	S	zinc finger CCCH domain-containing protein 44-like isoform X1 [Glycine max]		arahy.Tifrunner.gnm1.ann1.68RZIY.1	probable inactive histone-lysine N-methyltransferase SUVR2 [Arachis duranensis]
arahy.Tifrunner.gnm1.ann1.0RL0PX.1	1108	S	LOW QUALITY PROTEIN: DEAD-box ATP-dependent RNA helicase 40-like [Arachis ipaensis]		arahy.Tifrunner.gnm1.ann1.3Q5GH0.1	428	S	U-box domain-containing protein 7 [Arachis ipaensis]		arahy.Tifrunner.gnm1.ann1.3KSC2Z.1	369	S	protein ABHD17B-like [Arachis ipaensis]		arahy.Tifrunner.gnm1.ann1.68WCM1	synaptotagmin-5 [Arachis ipaensis]
arahy.Tifrunner.gnm1.ann1.4P5PRD.2	463	S	nucleolin 2 isoform X1 [Glycine max]		arahy.Tifrunner.gnm1.ann1.ZVXK34.2	80	S	ubiquitin carboxyl-terminal hydrolase 6-like [Arachis duranensis]		arahy.Tifrunner.gnm1.ann1.3M2LT7.1	193	S	serine/arginine-rich splicing factor RS40 isoform X1 [Arachis ipaensis]		arahy.Tifrunner.gnm1.ann1.68Y3DI.2	BZIP protein [Medicago truncatula]
arahy.Tifrunner.gnm1.ann1.QC4E5N.1	187	S	endonuclease/exonuclease/phosphatase family protein [Medicago truncatula]		arahy.Tifrunner.gnm1.ann1.N274YR.1	184	S	Golgi SNAP receptor complex member 1-2 [Arachis ipaensis]		arahy.Tifrunner.gnm1.ann1.3M2LT7.1	195	S	serine/arginine-rich splicing factor RS40 isoform X1 [Arachis ipaensis]		arahy.Tifrunner.gnm1.ann1.69CB9U.1	tetratricopeptide repeat protein 1-like [Arachis duranensis]
arahy.Tifrunner.gnm1.ann1.LY71N7.2	555	S	OBERON-like protein [Arachis ipaensis]		arahy.Tifrunner.gnm1.ann1.IW12TT.1	100	S	E3 ubiquitin-protein ligase MARCH7-like [Lupinus angustifolius]		arahy.Tifrunner.gnm1.ann1.3M2LT7.1	203	S	serine/arginine-rich splicing factor RS40 isoform X1 [Arachis ipaensis]		arahy.Tifrunner.gnm1.ann1.69CRNN.3	"BEL1-like homeodomain protein 4, partial [Arachis ipaensis]"
arahy.Tifrunner.gnm1.ann1.A7SJM3.1	279	T	transcription factor BIM1 isoform X2 [Arachis duranensis]		arahy.Tifrunner.gnm1.ann1.D0IPBT.1	1002	T	octicosapeptide/phox/Bem1p domain kinase superfamily protein [Medicago truncatula]		arahy.Tifrunner.gnm1.ann1.3M2LT7.1	211	S	serine/arginine-rich splicing factor RS40 isoform X1 [Arachis ipaensis]		arahy.Tifrunner.gnm1.ann1.69INVX.1	Ycf2 (chloroplast) [Lotus japonicus]
arahy.Tifrunner.gnm1.ann1.E79XBB.2	144	S	vacuolar amino acid transporter 1-like isoform X1 [Arachis ipaensis]		arahy.Tifrunner.gnm1.ann1.MWXJ8C.1	13	S	serine/threonine-protein kinase BIK1-like [Arachis ipaensis]		arahy.Tifrunner.gnm1.ann1.3M2LT7.1	233	S	serine/arginine-rich splicing factor RS40 isoform X1 [Arachis ipaensis]		arahy.Tifrunner.gnm1.ann1.69LNNJ.2	"phosphatidylinositol 3,4,5-trisphosphate 3-phosphatase and protein-tyrosine-phosphatase PTEN2A-like[Arachis duranensis]"
arahy.Tifrunner.gnm1.ann1.VL1078.1	641	S	protein PLASTID MOVEMENT IMPAIRED 2 [Arachis ipaensis]		arahy.Tifrunner.gnm1.ann1.4DJY3R.1	101	S	"keratin, type I cytoskeletal 10-like [Arachis duranensis]"		arahy.Tifrunner.gnm1.ann1.3M2LT7.1	242	S	serine/arginine-rich splicing factor RS40 isoform X1 [Arachis ipaensis]		arahy.Tifrunner.gnm1.ann1.69QRE7.1	homeobox-leucine zipper protein HAT7-like isoform X1 [Arachis duranensis]
arahy.Tifrunner.gnm1.ann1.T8W0FC.2	970	S	protein transport protein SEC31 homolog B [Arachis ipaensis]		arahy.Tifrunner.gnm1.ann1.PS1ZIG.1	93	S	DEAD-box ATP-dependent RNA helicase 46 isoform X1 [Arachis duranensis]		arahy.Tifrunner.gnm1.ann1.3M2LT7.1	283	S	serine/arginine-rich splicing factor RS40 isoform X1 [Arachis ipaensis]		arahy.Tifrunner.gnm1.ann1.69X35Q.2	DNA polymerase delta subunit 3 isoform X1 [Arachis ipaensis]
arahy.Tifrunner.gnm1.ann1.STDR6Y.4	151	S	phototropin-2 [Arachis duranensis]		arahy.Tifrunner.gnm1.ann1.6NG7WF.1	428	S	protein WVD2-like 5 [Arachis ipaensis]		arahy.Tifrunner.gnm1.ann1.3M2LT7.1	287	S	serine/arginine-rich splicing factor RS40 isoform X1 [Arachis ipaensis]		arahy.Tifrunner.gnm1.ann1.6AJ8U6.1	protein SCAR2-like [Arachis ipaensis]
arahy.Tifrunner.gnm1.ann1.SSVW3N.1	473	T	"protein WVD2-like 7, partial [Arachis ipaensis]"		arahy.Tifrunner.gnm1.ann1.9K340E.1	59	S	"putative methylesterase 12, chloroplastic isoform X1 [Arachis duranensis]"		arahy.Tifrunner.gnm1.ann1.3M73WP.1	83	S	transcription factor RF2a-like [Cajanus cajan]		arahy.Tifrunner.gnm1.ann1.6BI416.1	acyl-CoA-binding domain-containing protein 4 [Arachis ipaensis]
arahy.Tifrunner.gnm1.ann1.JE1LMX.1	150	S	serine/arginine-rich splicing factor RSZ21-like isoform X1 [Arachis ipaensis]		arahy.Tifrunner.gnm1.ann1.9D7AF0.1	164	S	protein RESTRICTED TEV MOVEMENT 2-like [Arachis ipaensis]		arahy.Tifrunner.gnm1.ann1.3M73WP.1	314	S	transcription factor RF2a-like [Cajanus cajan]		arahy.Tifrunner.gnm1.ann1.6BML15.1	topoisomerase II-associated protein PAT1 [Medicago truncatula]
arahy.Tifrunner.gnm1.ann1.MCG1UL.1	184	S	evolutionarily carboxy-terminal region protein [Medicago truncatula]		arahy.Tifrunner.gnm1.ann1.ET71BL.1	256	S	clathrin interactor EPSIN 3-like isoform X1 [Arachis ipaensis]		arahy.Tifrunner.gnm1.ann1.3M73WP.1	357	S	transcription factor RF2a-like [Cajanus cajan]		arahy.Tifrunner.gnm1.ann1.6DQ39T.1	"chlorophyll a-b binding protein CP29.2, chloroplastic-like [Arachis ipaensis]"
arahy.Tifrunner.gnm1.ann1.KA488U.2	466	S	peptidyl-prolyl cis-trans isomerase CYP59 [Arachis duranensis]		arahy.Tifrunner.gnm1.ann1.22W300.3	40	S	protein RCC2 homolog [Arachis ipaensis]		arahy.Tifrunner.gnm1.ann1.3M73WP.1	361	S	transcription factor RF2a-like [Cajanus cajan]		arahy.Tifrunner.gnm1.ann1.6DR1RM.1	protein ROOT HAIR DEFECTIVE 3-like [Arachis ipaensis]
arahy.Tifrunner.gnm1.ann1.P4S7LA.1	521	S	MACPF domain-containing protein At1g14780-like [Arachis ipaensis]		arahy.Tifrunner.gnm1.ann1.N7G5LN.1	531	S	growth-regulating factor 1-like [Arachis duranensis]		arahy.Tifrunner.gnm1.ann1.3M73WP.1	379	S	transcription factor RF2a-like [Cajanus cajan]		arahy.Tifrunner.gnm1.ann1.6E9CR1	polyadenylation and cleavage factor homolog 4 [Arachis duranensis]
arahy.Tifrunner.gnm1.ann1.745V0L.1	187	T	mechanosensitive ion channel protein 10-like [Arachis ipaensis]		arahy.Tifrunner.gnm1.ann1.L3AKFM.1	73	T	lysine histidine transporter-like 8 [Arachis duranensis]		arahy.Tifrunner.gnm1.ann1.3MI4YM.1	30	S	serine/threonine-protein kinase At5g01020-like [Arachis ipaensis]		arahy.Tifrunner.gnm1.ann1.6F5IGY.1	protein PHLOEM PROTEIN 2-LIKE A1-like [Arachis ipaensis]
arahy.Tifrunner.gnm1.ann1.R9RUHP.1	39	S	"vacuolar protein sorting-associated protein 54, chloroplastic [Arachis ipaensis]"		arahy.Tifrunner.gnm1.ann1.EXX8YY.1	416	S	serine/threonine-protein kinase At5g01020 [Arachis ipaensis]		arahy.Tifrunner.gnm1.ann1.3MI4YM.1	36	S	serine/threonine-protein kinase At5g01020-like [Arachis ipaensis]		arahy.Tifrunner.gnm1.ann1.6FX6NP.1	protein ENHANCED DISEASE RESISTANCE 4-like [Lupinus angustifolius]
arahy.Tifrunner.gnm1.ann1.CVJ130.1	110	T	"chlorophyll a-b binding protein CP29.2, chloroplastic-like [Arachis duranensis]"		arahy.Tifrunner.gnm1.ann1.4BAF6Y.1	358	S	IST1-like protein isoform X2 [Arachis ipaensis]		arahy.Tifrunner.gnm1.ann1.3MI4YM.1	419	S	serine/threonine-protein kinase At5g01020-like [Arachis ipaensis]		arahy.Tifrunner.gnm1.ann1.6G1AZV.1	homeobox protein LUMINIDEPENDENS [Arachis ipaensis]
arahy.Tifrunner.gnm1.ann1.HGX6IC.1	243	S	protein FAM63B [Vigna angularis]		arahy.Tifrunner.gnm1.ann1.GA8N54.1	120	T	formin-like protein 14 isoform X1 [Arachis ipaensis]		arahy.Tifrunner.gnm1.ann1.3ML67S.1	150	S	serine/threonine-protein kinase SRK2A-like [Arachis duranensis]		arahy.Tifrunner.gnm1.ann1.6GE0SS.1	phytochrome E-like isoform X2 [Arachis ipaensis]
arahy.Tifrunner.gnm1.ann1.M530PZ.1	1573	S	protein NETWORKED 1D [Arachis ipaensis]		arahy.Tifrunner.gnm1.ann1.KNS6CZ.1	424	S	mediator of RNA polymerase II transcription subunit 1-like [Cajanus cajan]		arahy.Tifrunner.gnm1.ann1.3ML67S.1	154	S	serine/threonine-protein kinase SRK2A-like [Arachis duranensis]		arahy.Tifrunner.gnm1.ann1.6GG9QX.1	reticulon-like protein B3 [Arachis duranensis]
arahy.Tifrunner.gnm1.ann1.QS45GW.3	528	S	peptidyl-prolyl cis-trans isomerase CYP63 [Arachis ipaensis]		arahy.Tifrunner.gnm1.ann1.11BQ2X.4	249	T	serine/arginine-rich splicing factor RS31-like isoform X1 [Arachis ipaensis]		arahy.Tifrunner.gnm1.ann1.3NB7S1	136	S	HMG1/2-like protein [Arachis duranensis]		arahy.Tifrunner.gnm1.ann1.6H6W8R.2	octicosapeptide/phox/Bem1p domain kinase superfamily protein [Medicago truncatula]
arahy.Tifrunner.gnm1.ann1.4BR56W.1	173	S	AMP deaminase-like [Arachis ipaensis]		arahy.Tifrunner.gnm1.ann1.L08NWK.1	28	S	NEDD8-conjugating enzyme Ubc12 [Arachis ipaensis]		arahy.Tifrunner.gnm1.ann1.3P0VV4	472	S	mitogen-activated protein kinase 20-like [Arachis ipaensis]		arahy.Tifrunner.gnm1.ann1.6I3V5I.1	formin-like protein 1 [Arachis duranensis]
arahy.Tifrunner.gnm1.ann1.2QV4RS.1	473	S	auxin efflux carrier component 4-like isoform X1 [Arachis ipaensis]		arahy.Tifrunner.gnm1.ann1.H530GP.3	50	S	mitochondrial import receptor subunit TOM20-like [Arachis ipaensis]		arahy.Tifrunner.gnm1.ann1.3P9E70.2	473	S	DUF21 domain-containing protein At4g14240-like [Arachis ipaensis]		arahy.Tifrunner.gnm1.ann1.6I6CSY.1	"WEB family protein At3g02930, chloroplastic [Arachis duranensis]"
arahy.Tifrunner.gnm1.ann1.M3DPW3.1	136	S	protein EMSY-LIKE 3-like isoform X1 [Arachis duranensis]		arahy.Tifrunner.gnm1.ann1.827X5P.1	138	S	DUF810 family protein [Medicago truncatula]		arahy.Tifrunner.gnm1.ann1.3PG13R.1	332	S	N6-adenosine-methyltransferase MT-A70-like [Arachis duranensis]		arahy.Tifrunner.gnm1.ann1.6IB1GK.1	NASP-related protein sim3 [Arachis ipaensis]
arahy.Tifrunner.gnm1.ann1.X4KYJQ.3	31	S	sugar transporter ERD6-like 6 [Arachis duranensis]		arahy.Tifrunner.gnm1.ann1.238B6D.1	238	T	cell wall protein DAN4-like [Arachis duranensis]		arahy.Tifrunner.gnm1.ann1.3PP5US.1	203	S	"photosystem I chlorophyll a/b-binding protein 6, chloroplastic [Arachis duranensis]"		arahy.Tifrunner.gnm1.ann1.6JR7Q1	caltractin [Arachis ipaensis]
arahy.Tifrunner.gnm1.ann1.827X5P.1	9	S	DUF810 family protein [Medicago truncatula]		arahy.Tifrunner.gnm1.ann1.2N4ZV5.1	16	S	"aspartate aminotransferase, mitochondrial [Arachis ipaensis]"		arahy.Tifrunner.gnm1.ann1.3Q5GH0.1	378	S	U-box domain-containing protein 7 [Arachis ipaensis]		arahy.Tifrunner.gnm1.ann1.6JS337.1	B-box zinc finger protein 18-like [Arachis duranensis]
arahy.Tifrunner.gnm1.ann1.7TG5YP.1	130	S	heavy metal-associated isoprenylated plant protein 26 [Arachis ipaensis]		arahy.Tifrunner.gnm1.ann1.J3GQ4Y.3	115	S	"heme-binding-like protein At3g10130, chloroplastic isoform X2 [Arachis duranensis]"		arahy.Tifrunner.gnm1.ann1.3Q5GH0.1	428	S	U-box domain-containing protein 7 [Arachis ipaensis]		arahy.Tifrunner.gnm1.ann1.6K20QR.1	chaperone DnaJ-domain protein [Medicago truncatula]
arahy.Tifrunner.gnm1.ann1.D9ZPCT.4	118	S	protein SCAI [Arachis ipaensis]		arahy.Tifrunner.gnm1.ann1.B4KLFS.1	60	S			arahy.Tifrunner.gnm1.ann1.3QB6PJ.1	141	S	aspartic proteinase-like protein 2 isoform X4 [Arachis duranensis]		arahy.Tifrunner.gnm1.ann1.6KP4CV.1	calcium-dependent protein kinase 2-like [Arachis duranensis]
arahy.Tifrunner.gnm1.ann1.023UF6.1	194	S	probable ADP-ribosylation factor GTPase-activating protein AGD6 [Arachis duranensis]		arahy.Tifrunner.gnm1.ann1.ZA4BYI.1	389	S	probable cinnamyl alcohol dehydrogenase 1 [Arachis duranensis]		arahy.Tifrunner.gnm1.ann1.3QB6PJ.1	142	S	aspartic proteinase-like protein 2 isoform X4 [Arachis duranensis]		arahy.Tifrunner.gnm1.ann1.6KU1RV.1	molybdenum cofactor sulfurase-like [Juglans regia]
arahy.Tifrunner.gnm1.ann1.861X9K.2	608	S	protein EFR3 homolog B-like isoform X2 [Arachis ipaensis]		arahy.Tifrunner.gnm1.ann1.GHU3Y0.1	657	S	protein IQ-DOMAIN 32-like [Arachis ipaensis]		arahy.Tifrunner.gnm1.ann1.3RP3M7.1	88	S	plastid movement impaired protein [Medicago truncatula]		arahy.Tifrunner.gnm1.ann1.6L1LF5.1	FHA domain-containing protein FHA2 [Arachis duranensis]
arahy.Tifrunner.gnm1.ann1.Y91V86.3	927	S	"phosphoenolpyruvate carboxylase, housekeeping isozyme [Cajanus cajan]"		arahy.Tifrunner.gnm1.ann1.M8XF3U.1	549	S	ataxin-2 homolog [Arachis ipaensis]		arahy.Tifrunner.gnm1.ann1.3RP3M7.1	109	S	plastid movement impaired protein [Medicago truncatula]		arahy.Tifrunner.gnm1.ann1.6MS3W4.1	"2,3-bisphosphoglycerate-independent phosphoglycerate mutase [Arachis ipaensis]"
arahy.Tifrunner.gnm1.ann1.JY4CMX.1	139	S	histone H2A-like [Arachis duranensis]		arahy.Tifrunner.gnm1.ann1.SMM8KX.1	303	S	PLAC8 family protein [Medicago truncatula]		arahy.Tifrunner.gnm1.ann1.3SV7H4.1	4	S	CDK-activating kinase assembly factor MAT1 [Arachis ipaensis]		arahy.Tifrunner.gnm1.ann1.6NG7W1	protein WVD2-like 5 [Arachis ipaensis]
arahy.Tifrunner.gnm1.ann1.NR3S8D.1	26	S	NADPH:quinone oxidoreductase-like [Arachis ipaensis]		arahy.Tifrunner.gnm1.ann1.UWV4C8.1	58	S	probable apyrase 7 [Arachis ipaensis]		arahy.Tifrunner.gnm1.ann1.3T3M0P.1	500	S	"stromal 70 kDa heat shock-related protein, chloroplastic isoform X1 [Arachis ipaensis]"		arahy.Tifrunner.gnm1.ann1.6NN0Y3	ABSCISIC ACID-INSENSITIVE 5-like protein 7 [Arachis duranensis]
arahy.Tifrunner.gnm1.ann1.CT2MPD.1	12	S	protein BRASSINAZOLE-RESISTANT 1 [Arachis ipaensis]		arahy.Tifrunner.gnm1.ann1.P00SCV.1	121	T	DEAD-box ATP-dependent RNA helicase 8-like [Arachis ipaensis]		arahy.Tifrunner.gnm1.ann1.3T59B3	30	S	serine/threonine-protein kinase HT1-like [Arachis ipaensis]		arahy.Tifrunner.gnm1.ann1.6PI0D0.1	receptor-like serine/threonine-protein kinase ALE2 [Arachis ipaensis]
arahy.Tifrunner.gnm1.ann1.RX6B2U.1	320	S	protein WVD2-like 5 isoform X1 [Arachis ipaensis]		arahy.Tifrunner.gnm1.ann1.23EZU0.1	354	S	hydroxyproline-rich glycoprotein family protein [Medicago truncatula]		arahy.Tifrunner.gnm1.ann1.3THH2M.2	100	S	probable transcriptional regulator SLK2 isoform X1 [Arachis ipaensis]		arahy.Tifrunner.gnm1.ann1.6QFK0R.1	putative inactive cadmium/zinc-transporting ATPase HMA3 isoform X1 [Arachis ipaensis]
arahy.Tifrunner.gnm1.ann1.R76IPR.1	1721	S	LOW QUALITY PROTEIN: THO complex subunit 2 [Arachis ipaensis]		arahy.Tifrunner.gnm1.ann1.TGV54E.1	83	S	ABC transporter G family member 3-like [Arachis ipaensis]		arahy.Tifrunner.gnm1.ann1.3THH2M.2	629	S	probable transcriptional regulator SLK2 isoform X1 [Arachis ipaensis]		arahy.Tifrunner.gnm1.ann1.6QNX53.1	trypsin family protein [Medicago truncatula]
arahy.Tifrunner.gnm1.ann1.J9ASUV.1	162	S	"myosin heavy chain, striated muscle [Cajanus cajan]"		arahy.Tifrunner.gnm1.ann1.E3R8VW.1	62	S	eukaryotic translation initiation factor 2 subunit alpha [Arachis duranensis]		arahy.Tifrunner.gnm1.ann1.3V4UGK.1	228	S	"senescence/dehydration-associated protein At4g35985, chloroplastic-like [Lupinus angustifolius]"		arahy.Tifrunner.gnm1.ann1.6R0DDZ.2	histone-lysine N-methyltransferase SUVR4 [Arachis ipaensis]
arahy.Tifrunner.gnm1.ann1.93GJX5.3	232	S	cyclin-dependent kinase G-2 [Arachis duranensis]		arahy.Tifrunner.gnm1.ann1.LW990M.1	1973	T	nuclear-pore anchor [Arachis duranensis]		arahy.Tifrunner.gnm1.ann1.3X6E38.1	18	S	F-box family protein [Populus trichocarpa]		arahy.Tifrunner.gnm1.ann1.6R0JB1	reticulon-like protein B9 [Arachis ipaensis]
arahy.Tifrunner.gnm1.ann1.LT4L2L.1	447	S	"protein CHUP1, chloroplastic isoform X1 [Arachis ipaensis]"		arahy.Tifrunner.gnm1.ann1.U8THEZ.1	605	S	evolutionarily carboxy-terminal region protein [Medicago truncatula]		arahy.Tifrunner.gnm1.ann1.3X6E38.1	20	S	F-box family protein [Populus trichocarpa]		arahy.Tifrunner.gnm1.ann1.6R22R1	Hop-interacting protein THI002 [Medicago truncatula]
arahy.Tifrunner.gnm1.ann1.LSP3Z9.1	157	S	"plant/T5J17-70 protein, putative [Medicago truncatula]"		arahy.Tifrunner.gnm1.ann1.CG4MLB.1	229	T	DUF724 domain-containing protein 3-like [Lupinus angustifolius]		arahy.Tifrunner.gnm1.ann1.3X6UQX.1	243	S	ubiquitin fusion degradation protein 1 homolog [Arachis ipaensis]		arahy.Tifrunner.gnm1.ann1.6R5024.1
arahy.Tifrunner.gnm1.ann1.K3K33Q.2	243	S	auxilin-related protein 2 [Arachis ipaensis]		arahy.Tifrunner.gnm1.ann1.69LNNJ.2	143	S	"phosphatidylinositol 3,4,5-trisphosphate 3-phosphatase and protein-tyrosine-phosphatase PTEN2A-like[Arachis duranensis]"		arahy.Tifrunner.gnm1.ann1.3X6UQX.1	244	S	ubiquitin fusion degradation protein 1 homolog [Arachis ipaensis]		arahy.Tifrunner.gnm1.ann1.6T0369.1	mRNA cap guanine-N7 methyltransferase 1-like [Arachis duranensis]
arahy.Tifrunner.gnm1.ann1.CZ3U7F.1	29	S	"probable serine/threonine-protein kinase Cx32, chloroplastic [Arachis ipaensis]"		arahy.Tifrunner.gnm1.ann1.T4HWHV.1	465	T	serine/threonine protein phosphatase 2A 55 kDa regulatory subunit B beta isoform-like isoform X1 [Arachis ipaensis]		arahy.Tifrunner.gnm1.ann1.3X8NRX.1	82	S	heat shock cognate 70 kDa protein 2 [Arachis ipaensis]		arahy.Tifrunner.gnm1.ann1.6TJY4I.2	"pumilio homolog 6, chloroplastic-like [Arachis duranensis]"
arahy.Tifrunner.gnm1.ann1.Z8UC8R.1	281	S	rhomboid-like protein 15 [Arachis ipaensis]		arahy.Tifrunner.gnm1.ann1.RP1N2X.1	195	S	"nucleoside diphosphate kinase IV, chloroplastic/mitochondrial-like isoform X2 [Arachis duranensis]"		arahy.Tifrunner.gnm1.ann1.3XEJ8W.2	45	S	trafficking protein particle complex subunit 1-like [Arachis ipaensis]		arahy.Tifrunner.gnm1.ann1.6WK0GY.2	B3 domain-containing transcription repressor VAL2 isoform X1 [Arachis ipaensis]
arahy.Tifrunner.gnm1.ann1.R6BV62.1	473	S	eukaryotic translation initiation factor 4B2-like [Arachis ipaensis]		arahy.Tifrunner.gnm1.ann1.L3AKFM.1	70	T	lysine histidine transporter-like 8 [Arachis duranensis]		arahy.Tifrunner.gnm1.ann1.3YB7R6.2	405	S	prolyl-tRNA synthetase associated domain-containing protein 1-like [Lupinus angustifolius]		arahy.Tifrunner.gnm1.ann1.6XT931	E3 ubiquitin-protein ligase RHF1A-like [Arachis duranensis]
arahy.Tifrunner.gnm1.ann1.IXF0I4.1	76	S	serine/threonine-protein kinase HT1-like [Arachis ipaensis]		arahy.Tifrunner.gnm1.ann1.SFIU4Y.2	121	S	26S protease regulatory subunit 6B homolog [Glycine max]		arahy.Tifrunner.gnm1.ann1.3YC2HT.2	255	S	phosphoenolpyruvate carboxylase 4-like [Arachis ipaensis]		arahy.Tifrunner.gnm1.ann1.6XZA8Y.1	U-box domain-containing protein 4 [Arachis ipaensis]
arahy.Tifrunner.gnm1.ann1.S1G93A.1	55	T	auxin-repressed 12.5 kDa protein [Arachis ipaensis]		arahy.Tifrunner.gnm1.ann1.SDH4Q1.2	701	S	C2 domain-containing protein At1g53590-like [Arachis ipaensis]		arahy.Tifrunner.gnm1.ann1.3YD711	879	S	"salt-inducible protein, putative [Medicago truncatula]"		arahy.Tifrunner.gnm1.ann1.6Y71DM.2	probable inactive receptor kinase At5g58300 [Arachis ipaensis]
arahy.Tifrunner.gnm1.ann1.JCMX0M.1	118	S	DNA-binding protein SMUBP-2 [Arachis ipaensis]		arahy.Tifrunner.gnm1.ann1.7WD3SA.2	292	S	serine/arginine-rich splicing factor SR45 [Arachis duranensis]		arahy.Tifrunner.gnm1.ann1.40ANBN.2	108	S	"transcriptional regulator of RNA polII, SAGA, subunit [Medicago truncatula]"		arahy.Tifrunner.gnm1.ann1.6Y8FH0.3	zinc finger CCCH domain-containing protein 64 [Arachis ipaensis]
arahy.Tifrunner.gnm1.ann1.Y78IXY.1	363	S	putative UPF0481 protein At3g02645 [Arachis duranensis]		arahy.Tifrunner.gnm1.ann1.A82XLX.1	37	S	chloride channel protein CLC-c-like [Arachis ipaensis]		arahy.Tifrunner.gnm1.ann1.40JDZM.3	1113	S	mediator of RNA polymerase II transcription subunit 15a-like [Arachis duranensis]		arahy.Tifrunner.gnm1.ann1.6YST69.1	"citrate synthase, glyoxysomal-like [Arachis ipaensis]"
arahy.Tifrunner.gnm1.ann1.897SEY.1	529	S	filaggrin [Arachis duranensis]		arahy.Tifrunner.gnm1.ann1.6TJY4I.2	614	S	"pumilio homolog 6, chloroplastic-like [Arachis duranensis]"		arahy.Tifrunner.gnm1.ann1.415NE5.1	780	S	exocyst complex component SEC15B [Arachis ipaensis]		arahy.Tifrunner.gnm1.ann1.70JD05.1	HMG-Y-related protein A-like [Arachis duranensis]
arahy.Tifrunner.gnm1.ann1.06XI8G.1	624	S	"pentatricopeptide repeat-containing protein At1g26460, mitochondrial [Arachis duranensis]"		arahy.Tifrunner.gnm1.ann1.D2DMXG.1	235	T	"glyceraldehyde-3-phosphate dehydrogenase A, chloroplastic [Arachis ipaensis]"		arahy.Tifrunner.gnm1.ann1.41MGIJ.1	703	S	synaptotagmin-5 [Arachis ipaensis]		arahy.Tifrunner.gnm1.ann1.70K8N6.1	probable NAD(P)H dehydrogenase (quinone) FQR1-like 1 [Arachis duranensis]
arahy.Tifrunner.gnm1.ann1.Q4SW2C.2	26	T	tropinone reductase homolog At5g06060-like [Cajanus cajan]		arahy.Tifrunner.gnm1.ann1.A2Z0UC.2	141	S	phototropin-2 [Arachis ipaensis]		arahy.Tifrunner.gnm1.ann1.41Y8R9.1	585	S	growth-regulating factor 7-like [Arachis duranensis]		arahy.Tifrunner.gnm1.ann1.70YL0N.3	double-stranded RNA-binding protein 6-like isoform X8 [Arachis ipaensis]
arahy.Tifrunner.gnm1.ann1.7NR7Q4.1	299	S	serine/arginine-rich splicing factor SR45 [Arachis ipaensis]		arahy.Tifrunner.gnm1.ann1.BJTL8K.1	16	S	"cyclops protein, putative [Medicago truncatula]"		arahy.Tifrunner.gnm1.ann1.43249I.1	36	S	RNA polymerase-associated protein LEO1-like [Arachis ipaensis]		arahy.Tifrunner.gnm1.ann1.717FF7.1	codeine O-demethylase-like [Arachis duranensis]
arahy.Tifrunner.gnm1.ann1.Q4SW2C.2	14	S	tropinone reductase homolog At5g06060-like [Cajanus cajan]		arahy.Tifrunner.gnm1.ann1.980X4K.2	172	S	transcription factor TGA6 isoform X1 [Arachis duranensis]		arahy.Tifrunner.gnm1.ann1.43249I.1	37	S	RNA polymerase-associated protein LEO1-like [Arachis ipaensis]		arahy.Tifrunner.gnm1.ann1.718LX1	G-type lectin S-receptor-like serine/threonine-protein kinase SD2-5 [Arachis ipaensis]
arahy.Tifrunner.gnm1.ann1.P6P7G9.1	583	S	DUF668 family protein [Medicago truncatula]		arahy.Tifrunner.gnm1.ann1.ZLH3PG.3	787	S	agenet domain protein [Medicago truncatula]		arahy.Tifrunner.gnm1.ann1.436L1R.1	15	S	"senescence/dehydration-associated protein At4g35985, chloroplastic-like [Cajanus cajan]"		arahy.Tifrunner.gnm1.ann1.71AIDN.2	splicing regulatory glutamine/lysine-rich protein 1 isoform X1 [Arachis ipaensis]
arahy.Tifrunner.gnm1.ann1.VW08M3.2	13	S	mechanosensitive ion channel protein 6-like [Arachis duranensis]		arahy.Tifrunner.gnm1.ann1.AUQB01.1	359	S	latex abundant protein 1 [Populus trichocarpa]		arahy.Tifrunner.gnm1.ann1.436L1R.1	19	S	"senescence/dehydration-associated protein At4g35985, chloroplastic-like [Cajanus cajan]"		arahy.Tifrunner.gnm1.ann1.71J8LW.1	cation-chloride cotransporter 1 [Arachis ipaensis]
arahy.Tifrunner.gnm1.ann1.FKJ1CZ.1	137	S	serine/threonine-protein kinase SAPK3-like [Arachis ipaensis]		arahy.Tifrunner.gnm1.ann1.8SJW9U.2	14	S	serine/threonine-protein kinase STE20-like isoform X1 [Arachis duranensis]		arahy.Tifrunner.gnm1.ann1.436L1R.1	212	S	"senescence/dehydration-associated protein At4g35985, chloroplastic-like [Cajanus cajan]"		arahy.Tifrunner.gnm1.ann1.71VUPL.1	putative lactoylglutathione lyase [Arachis ipaensis]
arahy.Tifrunner.gnm1.ann1.50NPJN.1	387	S	auxilin-related protein 2-like [Arachis duranensis]		arahy.Tifrunner.gnm1.ann1.89L395.3	44	S	DUF21 domain-containing protein At2g14520-like [Arachis duranensis]		arahy.Tifrunner.gnm1.ann1.436L1R.1	378	S	"senescence/dehydration-associated protein At4g35985, chloroplastic-like [Cajanus cajan]"		arahy.Tifrunner.gnm1.ann1.72DNA3.1	F-box protein SKIP8 [Arachis ipaensis]
arahy.Tifrunner.gnm1.ann1.Z2MV1Y.1	1563	T	brefeldin A-inhibited guanine nucleotide-exchange protein 5 [Arachis ipaensis]		arahy.Tifrunner.gnm1.ann1.FZUB0X.1	650	S	phosphoinositide phosphatase SAC3 [Arachis duranensis]		arahy.Tifrunner.gnm1.ann1.44QEU2.1	387	S	sodium/calcium exchanger family protein / calcium-binding EF hand family protein [Arabidopsis thaliana]		arahy.Tifrunner.gnm1.ann1.72FWH3.1	"protein indeterminate-domain 4, chloroplastic-like [Arachis ipaensis]"
arahy.Tifrunner.gnm1.ann1.Y0JIV8.1	319	S	"6-phosphofructo-2-kinase/fructose-2,6-bisphosphatase isoform X1 [Arachis duranensis]"		arahy.Tifrunner.gnm1.ann1.HLLS2Z.1	395	S	probable boron transporter 7 [Arachis ipaensis]		arahy.Tifrunner.gnm1.ann1.44QEU2.1	391	S	sodium/calcium exchanger family protein / calcium-binding EF hand family protein [Arabidopsis thaliana]		arahy.Tifrunner.gnm1.ann1.734U71	protein MEI2-like 4 isoform X1 [Arachis ipaensis]
arahy.Tifrunner.gnm1.ann1.1JKV8J.1	88	S	"triosephosphate isomerase, chloroplastic [Arachis duranensis]"		arahy.Tifrunner.gnm1.ann1.FDC534.1	1100	S	pre-mRNA-processing factor 17 [Arachis duranensis]		arahy.Tifrunner.gnm1.ann1.44Z8U5.3	9	S	plant/MEB5-like protein [Medicago truncatula]		arahy.Tifrunner.gnm1.ann1.738LA1	transducin/WD40 repeat protein [Medicago truncatula]
arahy.Tifrunner.gnm1.ann1.D032ER.1	344	S	histone-lysine N-methyltransferase ATXR3 [Arachis duranensis]		arahy.Tifrunner.gnm1.ann1.N565XM.2	209	S	zinc finger CCCH domain-containing protein 38-like [Arachis duranensis]		arahy.Tifrunner.gnm1.ann1.44Z8U5.3	389	S	plant/MEB5-like protein [Medicago truncatula]		arahy.Tifrunner.gnm1.ann1.73DRY2.1	CLIP-associated protein-like isoform X2 [Arachis ipaensis]
arahy.Tifrunner.gnm1.ann1.Y64AFY.2	232	S	pumilio homolog 2-like [Arachis ipaensis]		arahy.Tifrunner.gnm1.ann1.HWCZ3H.2	723	S	DEAD-box ATP-dependent RNA helicase 46 isoform X1 [Arachis duranensis]		arahy.Tifrunner.gnm1.ann1.44Z8U5.3	601	S	plant/MEB5-like protein [Medicago truncatula]		arahy.Tifrunner.gnm1.ann1.73LV1S.3	probable ADP-ribosylation factor GTPase-activating protein AGD14 [Arachis duranensis]
arahy.Tifrunner.gnm1.ann1.L3RJRN.1	60	S	"succinate dehydrogenase [ubiquinone] iron-sulfur subunit 2, mitochondrial-like [Arachis ipaensis]"		arahy.Tifrunner.gnm1.ann1.MX792F.1	406	S	chitin elicitor receptor kinase 1-like [Arachis duranensis]		arahy.Tifrunner.gnm1.ann1.45L0X3	222	S	pre-mRNA-splicing factor 38B [Arachis duranensis]		arahy.Tifrunner.gnm1.ann1.745V0L.1	mechanosensitive ion channel protein 10-like [Arachis ipaensis]
arahy.Tifrunner.gnm1.ann1.ZKNE4R.1	202	S	protein TIME FOR COFFEE-like [Arachis duranensis]		arahy.Tifrunner.gnm1.ann1.Q5B35H.1	85	S	auxin-repressed 12.5 kDa protein-like [Arachis ipaensis]		arahy.Tifrunner.gnm1.ann1.45L0X3	337	S	pre-mRNA-splicing factor 38B [Arachis duranensis]		arahy.Tifrunner.gnm1.ann1.76DKB4.1	translation initiation factor IF-2 [Arachis ipaensis]
arahy.Tifrunner.gnm1.ann1.ADA7T8.2	531	S	enhancer of mRNA-decapping protein 4-like isoform X3 [Arachis duranensis]		arahy.Tifrunner.gnm1.ann1.GF44T2.1	29	S	"nascent polypeptide-associated complex subunit alpha, muscle-specific form [Malus domestica]"		arahy.Tifrunner.gnm1.ann1.45L0X3	378	S	pre-mRNA-splicing factor 38B [Arachis duranensis]		arahy.Tifrunner.gnm1.ann1.779YC2	"root border cell-specific protein, putative [Medicago truncatula]"
arahy.Tifrunner.gnm1.ann1.4L72G1.2	180	S	clathrin interactor EPSIN 1 [Arachis ipaensis]		arahy.Tifrunner.gnm1.ann1.NZ9422.1	251	S	protein QUIRKY [Arachis duranensis]		arahy.Tifrunner.gnm1.ann1.45SMBX.1	17	S	kinesin light chain [Arachis ipaensis]		arahy.Tifrunner.gnm1.ann1.77LVUR.1	cytochrome P450 81E8-like [Arachis ipaensis]
arahy.Tifrunner.gnm1.ann1.492HD2.1	217	S	DUF724 domain-containing protein 3 [Vigna angularis]		arahy.Tifrunner.gnm1.ann1.XK3KPA.1	697	T	protein STRUBBELIG-RECEPTOR FAMILY 6 [Arachis duranensis]		arahy.Tifrunner.gnm1.ann1.45SMBX.1	28	S	kinesin light chain [Arachis ipaensis]		arahy.Tifrunner.gnm1.ann1.77YH77.1	probable aldehyde dehydrogenase [Arachis ipaensis]
arahy.Tifrunner.gnm1.ann1.ZV45BV.1	203	S	deSI-like protein At4g17486 [Arachis ipaensis]		arahy.Tifrunner.gnm1.ann1.90BUAB.1	122	S	mitogen-activated protein kinase kinase kinase 1-like [Arachis ipaensis]		arahy.Tifrunner.gnm1.ann1.45SMBX.1	33	S	kinesin light chain [Arachis ipaensis]		arahy.Tifrunner.gnm1.ann1.7813IZ.1	BTB/POZ domain-containing protein NPY2 [Arachis duranensis]
arahy.Tifrunner.gnm1.ann1.2WY12S.1	628	S	lysM domain receptor-like kinase 4 [Arachis ipaensis]		arahy.Tifrunner.gnm1.ann1.ZSLI3V.1	576	S	regulatory protein NPR3-like [Arachis ipaensis]		arahy.Tifrunner.gnm1.ann1.45SMBX.1	41	S	kinesin light chain [Arachis ipaensis]		arahy.Tifrunner.gnm1.ann1.786IJ1
arahy.Tifrunner.gnm1.ann1.KFQ7S3.4	938	S	LOW QUALITY PROTEIN: 125 kDa kinesin-related protein-like [Arachis duranensis]		arahy.Tifrunner.gnm1.ann1.H4I0EH.2	388	S	TOM1-like protein 2 [Arachis ipaensis]		arahy.Tifrunner.gnm1.ann1.45SMBX.1	43	S	kinesin light chain [Arachis ipaensis]		arahy.Tifrunner.gnm1.ann1.790TY1	probable LRR receptor-like serine/threonine-protein kinase At1g06840 [Arachis ipaensis]
arahy.Tifrunner.gnm1.ann1.S1G93A.1	57	T	auxin-repressed 12.5 kDa protein [Arachis ipaensis]		arahy.Tifrunner.gnm1.ann1.F02FPT.1	58	S	biogenesis of lysosome-related organelles complex 1 subunit 1 [Arachis duranensis]		arahy.Tifrunner.gnm1.ann1.46GER1	710	S	kinesin-like protein KCA2 [Arachis ipaensis]		arahy.Tifrunner.gnm1.ann1.794712	WRKY transcription factor 1-like isoform X1 [Arachis ipaensis]
arahy.Tifrunner.gnm1.ann1.G6Z6LZ.2	1372	S	receptor-like serine/threonine-protein kinase ALE2 isoform X5 [Arachis ipaensis]		arahy.Tifrunner.gnm1.ann1.AUQB01.1	203	S	latex abundant protein 1 [Populus trichocarpa]		arahy.Tifrunner.gnm1.ann1.46GER1	715	S	kinesin-like protein KCA2 [Arachis ipaensis]		arahy.Tifrunner.gnm1.ann1.79GVE2.1	probable LRR receptor-like serine/threonine-protein kinase At1g06840 [Arachis duranensis]
arahy.Tifrunner.gnm1.ann1.NEJ4KC.2	26	T	probable transcription factor PosF21 [Arachis ipaensis]		arahy.Tifrunner.gnm1.ann1.4BEG1R.1	625	S	"UPF0503 protein At3g09070, chloroplastic [Arachis duranensis]"		arahy.Tifrunner.gnm1.ann1.46GER2	336	S	kinesin-like protein KCA2 [Arachis ipaensis]		arahy.Tifrunner.gnm1.ann1.79RC6W.2	LOW QUALITY PROTEIN: protein NAP1-like [Cajanus cajan]
arahy.Tifrunner.gnm1.ann1.549WES.1	107	S	protein tesmin/TSO1-like CXC 5 [Arachis ipaensis]		arahy.Tifrunner.gnm1.ann1.M6CJ98.1	1108	T	serine/threonine-protein kinase STE20-like isoform X1 [Arachis duranensis]		arahy.Tifrunner.gnm1.ann1.46GER2	341	S	kinesin-like protein KCA2 [Arachis ipaensis]		arahy.Tifrunner.gnm1.ann1.79RH61	RHOMBOID-like protein 1 [Arachis ipaensis]
arahy.Tifrunner.gnm1.ann1.M803HM.1	84	S	vacuolar amino acid transporter 1 isoform X1 [Arachis duranensis]		arahy.Tifrunner.gnm1.ann1.22W300.3	47	S	protein RCC2 homolog [Arachis ipaensis]		arahy.Tifrunner.gnm1.ann1.46GER2	524	S	kinesin-like protein KCA2 [Arachis ipaensis]		arahy.Tifrunner.gnm1.ann1.79SPSS.1	protein tesmin/TSO1-like CXC 2 [Arachis ipaensis]
arahy.Tifrunner.gnm1.ann1.Y64AFY.2	412	S	pumilio homolog 2-like [Arachis ipaensis]		arahy.Tifrunner.gnm1.ann1.8H8JUA.1	595	S	serine/arginine-rich splicing factor RS40 isoform X1 [Arachis duranensis]		arahy.Tifrunner.gnm1.ann1.46S9P8.1	355	S	TOM1-like protein 2 [Arachis duranensis]		arahy.Tifrunner.gnm1.ann1.79UAYX.1	transcription factor [Medicago truncatula]
arahy.Tifrunner.gnm1.ann1.UIUY7Y.1	226	T	E3 ubiquitin-protein ligase MARCH11-like isoform X2 [Arachis ipaensis]		arahy.Tifrunner.gnm1.ann1.S2G015.1	292	S	LIMR family protein At5g01460 [Arachis ipaensis]		arahy.Tifrunner.gnm1.ann1.478ZG4.2	51	S	"aspartate--tRNA ligase 2, cytoplasmic [Arachis ipaensis]"		arahy.Tifrunner.gnm1.ann1.7AZW9Z.2	"50S ribosomal protein L1, chloroplastic isoform X2 [Arachis ipaensis]"
arahy.Tifrunner.gnm1.ann1.YWUF76.1	1196	S	1-phosphatidylinositol-3-phosphate 5-kinase FAB1B-like [Arachis ipaensis]		arahy.Tifrunner.gnm1.ann1.TWIF5Z.2	381	T	SWR1-complex protein 4-like [Arachis ipaensis]		arahy.Tifrunner.gnm1.ann1.478ZG4.2	269	S	"aspartate--tRNA ligase 2, cytoplasmic [Arachis ipaensis]"		arahy.Tifrunner.gnm1.ann1.7B5I5W.1	U-box domain-containing protein 3 isoform X1 [Arachis ipaensis]
arahy.Tifrunner.gnm1.ann1.CVJ130.1	112	T	"chlorophyll a-b binding protein CP29.2, chloroplastic-like [Arachis duranensis]"		arahy.Tifrunner.gnm1.ann1.RVM1DJ.1	215	S	B3 domain-containing transcription factor VRN1 isoform X1 [Arachis duranensis]		arahy.Tifrunner.gnm1.ann1.47PCZJ.2	43	S	annexin D2 [Arachis ipaensis]		arahy.Tifrunner.gnm1.ann1.7B7L43	evolutionarily carboxy-terminal region protein [Medicago truncatula]
arahy.Tifrunner.gnm1.ann1.MI9KMH.4	346	S	hydroxyproline-rich glycoprotein family protein [Medicago truncatula]		arahy.Tifrunner.gnm1.ann1.KMF75D.1	655	T	boron transporter 1-like [Arachis duranensis]		arahy.Tifrunner.gnm1.ann1.47SX71	230	S	E3 ubiquitin-protein ligase MARCH7-like isoform X2 [Arachis ipaensis]		arahy.Tifrunner.gnm1.ann1.7C35U2	exosome complex component RRP41-like [Arachis ipaensis]
arahy.Tifrunner.gnm1.ann1.ZXWJ3N.1	10	S	casparian strip membrane protein 3-like [Arachis duranensis]		arahy.Tifrunner.gnm1.ann1.K65K48.3	805	S	dynamin-related protein 3A [Arachis duranensis]		arahy.Tifrunner.gnm1.ann1.48QDBJ.1	57	S	stromal cell-derived factor 2-like protein [Arachis ipaensis]		arahy.Tifrunner.gnm1.ann1.7CP983	"zinc knuckle (CCHC-type) family protein, putative [Medicago truncatula]"
arahy.Tifrunner.gnm1.ann1.0B6IYK.2	149	S	GEM-like protein 1 [Arachis duranensis]		arahy.Tifrunner.gnm1.ann1.Y7FANU.1	128	S	40S ribosomal protein S4-2-like [Arachis duranensis]		arahy.Tifrunner.gnm1.ann1.48W8D3.1	644	S	protein MEI2-like 5 [Arachis ipaensis]		arahy.Tifrunner.gnm1.ann1.7CTW4M.1	protein IQ-DOMAIN 32 [Arachis ipaensis]
arahy.Tifrunner.gnm1.ann1.11BQ2X.4	231	S	serine/arginine-rich splicing factor RS31-like isoform X1 [Arachis ipaensis]		arahy.Tifrunner.gnm1.ann1.LZ6UUP.2	23	S	cyclin-T1-3-like [Arachis duranensis]		arahy.Tifrunner.gnm1.ann1.492HD2.1	19	S	DUF724 domain-containing protein 3 [Vigna angularis]		arahy.Tifrunner.gnm1.ann1.7E86K1	metabotropic glutamate receptor-like protein P [Cicer arietinum]
arahy.Tifrunner.gnm1.ann1.W27D8N.1	159	S	serine/threonine-protein kinase D6PKL1 [Arachis duranensis]		arahy.Tifrunner.gnm1.ann1.ZV45BV.1	205	S	deSI-like protein At4g17486 [Arachis ipaensis]		arahy.Tifrunner.gnm1.ann1.492HD2.1	216	S	DUF724 domain-containing protein 3 [Vigna angularis]		arahy.Tifrunner.gnm1.ann1.7F0WTK.1	COP1-interacting-like protein [Medicago truncatula]
arahy.Tifrunner.gnm1.ann1.Z0JFW0.2	37	S	tetratricopeptide repeat protein 28-like [Arachis ipaensis]		arahy.Tifrunner.gnm1.ann1.E2WYS1.1	70	S	ATP-dependent 6-phosphofructokinase 3-like [Arachis ipaensis]		arahy.Tifrunner.gnm1.ann1.492HD2.1	217	S	DUF724 domain-containing protein 3 [Vigna angularis]		arahy.Tifrunner.gnm1.ann1.7F0ZFP.2	dentin sialophosphoprotein [Arachis duranensis]
arahy.Tifrunner.gnm1.ann1.SFW5N9.1	32	S	"fructose-bisphosphate aldolase, cytoplasmic isozyme [Arachis duranensis]"		arahy.Tifrunner.gnm1.ann1.MKFK5S.1	182	S	ras-related protein RABD1-like [Arachis ipaensis]		arahy.Tifrunner.gnm1.ann1.49JIZL.1	16	S	peroxisomal membrane protein PEX14 isoform X1 [Arachis ipaensis]		arahy.Tifrunner.gnm1.ann1.7F1JQP.1	ABA-responsive protein ABR17-like [Arachis ipaensis]
arahy.Tifrunner.gnm1.ann1.H6IXD1.1	49	S	protein transport protein Sec61 subunit beta [Arachis ipaensis]		arahy.Tifrunner.gnm1.ann1.MJPM8B.1	57	S	upstream activation factor subunit UAF30-like [Arachis ipaensis]		arahy.Tifrunner.gnm1.ann1.49JIZL.1	21	S	peroxisomal membrane protein PEX14 isoform X1 [Arachis ipaensis]		arahy.Tifrunner.gnm1.ann1.7F80QJ.1	"endo-1,4-beta-xylanase A-like [Arachis ipaensis]"
arahy.Tifrunner.gnm1.ann1.F3K4LC.2	59	S	transducin/WD40 repeat protein [Medicago truncatula]		arahy.Tifrunner.gnm1.ann1.LGT5H6.1	774	S	tudor/PWWP/MBT superfamily protein [Medicago truncatula]		arahy.Tifrunner.gnm1.ann1.49TA12.1	241	S	actin cytoskeleton-regulatory complex protein PAN1-like isoform X1 [Arachis ipaensis]		arahy.Tifrunner.gnm1.ann1.7FJL8T.2	splicing factor U2af large subunit A-like isoform X2 [Vigna radiata var. radiata]
arahy.Tifrunner.gnm1.ann1.15IZES.1	157	S	myb-like protein H isoform X1 [Populus euphratica]		arahy.Tifrunner.gnm1.ann1.JN5ZJX.1	275	S	cell wall protein RBR3-like [Glycine max]		arahy.Tifrunner.gnm1.ann1.49TA12.1	436	S	actin cytoskeleton-regulatory complex protein PAN1-like isoform X1 [Arachis ipaensis]		arahy.Tifrunner.gnm1.ann1.7FUZ0V.2	probable serine/threonine-protein kinase WNK3 isoform X2 [Arachis duranensis]
arahy.Tifrunner.gnm1.ann1.5SR8FF.4	1026	S	E3 ubiquitin-protein ligase UPL3 isoform X3 [Arachis duranensis]		arahy.Tifrunner.gnm1.ann1.1VS4ZL.2	242	S	zonadhesin-like [Arachis ipaensis]		arahy.Tifrunner.gnm1.ann1.4BAF6Y.1	358	S	IST1-like protein isoform X2 [Arachis ipaensis]		arahy.Tifrunner.gnm1.ann1.7G0Y3W.1	probable leucine-rich repeat receptor-like protein kinase At1g68400 [Arachis duranensis]
arahy.Tifrunner.gnm1.ann1.UU4P1L.1	979	T	phospholipase D delta [Arachis duranensis]		arahy.Tifrunner.gnm1.ann1.WSMZ37.1	138	S	"transmembrane protein, putative [Medicago truncatula]"		arahy.Tifrunner.gnm1.ann1.4BEG1R.1	625	S	"UPF0503 protein At3g09070, chloroplastic [Arachis duranensis]"		arahy.Tifrunner.gnm1.ann1.7HV2PX.1	F-actin-capping protein subunit alpha isoform X2 [Arachis ipaensis]
arahy.Tifrunner.gnm1.ann1.U2WZ8A.2	342	T	myosin-binding protein 7-like isoform X1 [Glycine max]		arahy.Tifrunner.gnm1.ann1.S0M071.1	136	S	"50S ribosomal protein L5, chloroplastic [Arachis ipaensis]"		arahy.Tifrunner.gnm1.ann1.4BR56W.1	143	S	AMP deaminase-like [Arachis ipaensis]		arahy.Tifrunner.gnm1.ann1.7IC8P2	myosin-binding protein 7-like [Arachis ipaensis]
arahy.Tifrunner.gnm1.ann1.E7873Y.3	650	T	serine/arginine repetitive matrix protein 2 isoform X3 [Glycine max]		arahy.Tifrunner.gnm1.ann1.B285UM.1	6	T	ankyrin repeat-containing protein At5g02620-like [Arachis ipaensis]		arahy.Tifrunner.gnm1.ann1.4BR56W.1	144	S	AMP deaminase-like [Arachis ipaensis]		arahy.Tifrunner.gnm1.ann1.7J6TQU.1	"50S ribosomal protein L18, chloroplastic-like [Arachis ipaensis]"
arahy.Tifrunner.gnm1.ann1.BN91FR.1	114	S	RNA-binding protein 1-like [Arachis ipaensis]		arahy.Tifrunner.gnm1.ann1.P6P9CF.1	3305	S	GYF domain protein [Medicago truncatula]		arahy.Tifrunner.gnm1.ann1.4BR56W.1	157	S	AMP deaminase-like [Arachis ipaensis]		arahy.Tifrunner.gnm1.ann1.7J7UQ4.2	probable alkaline/neutral invertase D [Arachis duranensis]
arahy.Tifrunner.gnm1.ann1.K9BQ1G.1	9	S	cullin-4 [Arachis ipaensis]		arahy.Tifrunner.gnm1.ann1.GBN5SF.2	631	S	serine/arginine repetitive matrix protein 2-like isoform X2 [Arachis ipaensis]		arahy.Tifrunner.gnm1.ann1.4BR56W.1	162	S	AMP deaminase-like [Arachis ipaensis]		arahy.Tifrunner.gnm1.ann1.7JV24P.1	Thionin-like protein [Medicago truncatula]
arahy.Tifrunner.gnm1.ann1.XAI7HT.1	269	T	pumilio homolog 2-like [Arachis ipaensis]		arahy.Tifrunner.gnm1.ann1.RY2Y1Z.1	79	S	auxin-repressed 12.5 kDa protein-like [Arachis ipaensis]		arahy.Tifrunner.gnm1.ann1.4BR56W.1	173	S	AMP deaminase-like [Arachis ipaensis]		arahy.Tifrunner.gnm1.ann1.7KG1FV.2	serine-rich adhesin for platelets-like [Arachis ipaensis]
arahy.Tifrunner.gnm1.ann1.VPDB1U.2	257	S	linoleate 9S-lipoxygenase 1-like [Arachis duranensis]		arahy.Tifrunner.gnm1.ann1.J4YCND.1	78	S	"29 kDa ribonucleoprotein A, chloroplastic [Arachis duranensis]"		arahy.Tifrunner.gnm1.ann1.4CC3R7.1	177	S	protein transport protein SEC31 isoform X1 [Arachis duranensis]		arahy.Tifrunner.gnm1.ann1.7L21K7.1	inducible nitrate reductase [NADH] 2 [Arachis duranensis]
arahy.Tifrunner.gnm1.ann1.AB1T8P.3	117	S	transcription elongation factor TFIIS [Arachis ipaensis]		arahy.Tifrunner.gnm1.ann1.YL3Z6V.1	205	S	"glyceraldehyde-3-phosphate dehydrogenase GAPC2, cytosolic [Arachis duranensis]"		arahy.Tifrunner.gnm1.ann1.4CC3R7.1	183	S	protein transport protein SEC31 isoform X1 [Arachis duranensis]		arahy.Tifrunner.gnm1.ann1.7M06WQ.1	protein WVD2-like 2 [Arachis ipaensis]
arahy.Tifrunner.gnm1.ann1.CP70Z4.3	217	S	probable vacuolar amino acid transporter YPQ1 isoform X2 [Arachis ipaensis]		arahy.Tifrunner.gnm1.ann1.QHLN3W.1	449	T	putative hydrolase YtaP [Arachis ipaensis]		arahy.Tifrunner.gnm1.ann1.4D1XNM.2	149	S	SNARE-associated-like protein [Medicago truncatula]		arahy.Tifrunner.gnm1.ann1.7N5RT2.2	protein SMG7 [Arachis ipaensis]
arahy.Tifrunner.gnm1.ann1.XN0C9H.1	135	S	histone-lysine N-methyltransferase SETD1A-like [Cajanus cajan]		arahy.Tifrunner.gnm1.ann1.L78ELK.2	667	S	epidermal growth factor receptor substrate 15 [Arachis duranensis]		arahy.Tifrunner.gnm1.ann1.4DJY3R.1	26	S	"keratin, type I cytoskeletal 10-like [Arachis duranensis]"		arahy.Tifrunner.gnm1.ann1.7NR7Q4.1	serine/arginine-rich splicing factor SR45 [Arachis ipaensis]
arahy.Tifrunner.gnm1.ann1.PUBH8J.1	1402	S	Myb DNA-binding domain protein [Medicago truncatula]		arahy.Tifrunner.gnm1.ann1.F3IAW8.2	30	S	WRKY transcription factor 1-like isoform X1 [Arachis duranensis]		arahy.Tifrunner.gnm1.ann1.4DJY3R.1	96	S	"keratin, type I cytoskeletal 10-like [Arachis duranensis]"		arahy.Tifrunner.gnm1.ann1.7PDB7U.3	DNA topoisomerase 1-like [Arachis ipaensis]
arahy.Tifrunner.gnm1.ann1.SEJH4Y.1	216	S	mannose-1-phosphate guanyltransferase alpha-B-like [Arachis ipaensis]		arahy.Tifrunner.gnm1.ann1.099TXP.1	169	S	putative E3 ubiquitin-protein ligase RF298 [Arachis ipaensis]		arahy.Tifrunner.gnm1.ann1.4DJY3R.1	97	S	"keratin, type I cytoskeletal 10-like [Arachis duranensis]"		arahy.Tifrunner.gnm1.ann1.7PY5NM.1	ubiquitin-protein ligase [Medicago truncatula]
arahy.Tifrunner.gnm1.ann1.D6F5SH.1	256	T	putative G3BP-like protein [Arachis duranensis]		arahy.Tifrunner.gnm1.ann1.K5L3ZW.1	379	T	"protein kinase 2B, chloroplastic [Arachis ipaensis]"		arahy.Tifrunner.gnm1.ann1.4E0751	527	S	sericin 1 isoform X1 [Arachis duranensis]		arahy.Tifrunner.gnm1.ann1.7QGM13.1	far upstream element-binding protein 2 [Arachis ipaensis]
arahy.Tifrunner.gnm1.ann1.ZBDE9H.5	717	S	transducin/WD40 repeat protein [Medicago truncatula]		arahy.Tifrunner.gnm1.ann1.RT0S28.1	259	S	epidermal growth factor receptor substrate 15-like 1 isoform X1 [Arachis ipaensis]		arahy.Tifrunner.gnm1.ann1.4E0751	726	S	sericin 1 isoform X1 [Arachis duranensis]		arahy.Tifrunner.gnm1.ann1.7R6RP5.1	myosin-9 [Arachis duranensis]
arahy.Tifrunner.gnm1.ann1.XFQ1DZ.3	65	S	zinc finger CCCH domain-containing protein 13-like [Arachis duranensis]		arahy.Tifrunner.gnm1.ann1.NAZL7K.1	370	S	protein IQ-DOMAIN 1 [Arachis duranensis]		arahy.Tifrunner.gnm1.ann1.4E0751	765	S	sericin 1 isoform X1 [Arachis duranensis]		arahy.Tifrunner.gnm1.ann1.7T3N35.1	BAH domain-containing protein [Medicago truncatula]
arahy.Tifrunner.gnm1.ann1.YVP0PI.1	636	S	probable inactive leucine-rich repeat receptor-like protein kinase At1g66830 [Arachis ipaensis]		arahy.Tifrunner.gnm1.ann1.I2F35R.1	92	S	protein SODIUM POTASSIUM ROOT DEFECTIVE 2 [Cajanus cajan]		arahy.Tifrunner.gnm1.ann1.4F0PLK.1	98	S	forkhead-associated (FHA) domain protein [Medicago truncatula]		arahy.Tifrunner.gnm1.ann1.7T7KVP.1	LOW QUALITY PROTEIN: transcription elongation factor B polypeptide 3 [Arachis duranensis]
arahy.Tifrunner.gnm1.ann1.CE4N6Q.1	134	S	serine/threonine-protein kinase STE20-like isoform X1 [Arachis duranensis]		arahy.Tifrunner.gnm1.ann1.9V0IYD.1	21	S	P-loop nucleoside triphosphate hydrolase superfamily protein [Medicago truncatula]		arahy.Tifrunner.gnm1.ann1.4F0PLK.1	102	S	forkhead-associated (FHA) domain protein [Medicago truncatula]		arahy.Tifrunner.gnm1.ann1.7T9QNI.1	"plant/F1L3-4 protein, putative [Medicago truncatula]"
arahy.Tifrunner.gnm1.ann1.VX2J7C.1	85	S	VMA21-like domain protein [Medicago truncatula]		arahy.Tifrunner.gnm1.ann1.JYM9I0.1	529	S	filaggrin [Arachis ipaensis]		arahy.Tifrunner.gnm1.ann1.4FD105.2	53	S	protein KAKU4-like isoform X5 [Glycine max]		arahy.Tifrunner.gnm1.ann1.7TG5YP.1	heavy metal-associated isoprenylated plant protein 26 [Arachis ipaensis]
arahy.Tifrunner.gnm1.ann1.KDE77Y.4	225	T	pumilio homolog 2-like [Arachis ipaensis]		arahy.Tifrunner.gnm1.ann1.WSY56D.2	306	S	cyclase-associated protein 1 [Arachis duranensis]		arahy.Tifrunner.gnm1.ann1.4FD105.2	203	S	protein KAKU4-like isoform X5 [Glycine max]		arahy.Tifrunner.gnm1.ann1.7TGU71.1	polyadenylate-binding protein-interacting protein 3-like isoform X4 [Arachis ipaensis]
arahy.Tifrunner.gnm1.ann1.T2JUVA.1	692	T	probable protein S-acyltransferase 19 isoform X1 [Arachis duranensis]		arahy.Tifrunner.gnm1.ann1.K60PJ1.1	62	S	actin-3 [Arachis ipaensis]		arahy.Tifrunner.gnm1.ann1.4FD105.2	404	S	protein KAKU4-like isoform X5 [Glycine max]		arahy.Tifrunner.gnm1.ann1.7U0171	seed linoleate 9S-lipoxygenase-3-like [Arachis duranensis]
arahy.Tifrunner.gnm1.ann1.A1PMZW.1	918	S	bromodomain and WD repeat-containing protein 1-like [Arachis duranensis]		arahy.Tifrunner.gnm1.ann1.00WUVK.1	429	S	plant UBX domain-containing protein 8 isoform X2 [Arachis ipaensis]		arahy.Tifrunner.gnm1.ann1.4FD105.2	414	S	protein KAKU4-like isoform X5 [Glycine max]		arahy.Tifrunner.gnm1.ann1.7UX44P.1	serine/threonine-protein kinase tricorner [Arachis ipaensis]
arahy.Tifrunner.gnm1.ann1.WWBH0C.1	48	S	SNF1-related protein kinase regulatory subunit beta-1 isoform X1 [Arachis ipaensis]		arahy.Tifrunner.gnm1.ann1.LCWP3I.1	35	S	peptidyl-prolyl cis-trans isomerase Pin1 [Arachis ipaensis]		arahy.Tifrunner.gnm1.ann1.4FD105.2	559	S	protein KAKU4-like isoform X5 [Glycine max]		arahy.Tifrunner.gnm1.ann1.7VP81J.1	"transmembrane protein, putative [Medicago truncatula]"
arahy.Tifrunner.gnm1.ann1.44Z8U5.3	387	S	plant/MEB5-like protein [Medicago truncatula]		arahy.Tifrunner.gnm1.ann1.B0P3FA.3	800	S	U2 snRNP-associated SURP motif-containing protein-like [Arachis duranensis]		arahy.Tifrunner.gnm1.ann1.4FT79Q.1	2132	S	BEACH domain-containing protein C2 [Vigna angularis]		arahy.Tifrunner.gnm1.ann1.7VZ02V.1	photosystem I P700 chlorophyll a apoprotein A1 (chloroplast) [Lupinus luteus]
arahy.Tifrunner.gnm1.ann1.YEIN47.3	161	T	CBL-interacting serine/threonine-protein kinase 8 [Arachis ipaensis]		arahy.Tifrunner.gnm1.ann1.0N5IZC.1	220	S	LOW QUALITY PROTEIN: transcription elongation factor B polypeptide 3-like [Arachis ipaensis]		arahy.Tifrunner.gnm1.ann1.4HQ694.2	133	S	vesicle transport protein SEC20 [Arachis ipaensis]		arahy.Tifrunner.gnm1.ann1.7WD3S2	serine/arginine-rich splicing factor SR45 [Arachis duranensis]
arahy.Tifrunner.gnm1.ann1.3B9L35.1	78	S	"transmembrane protein, putative [Medicago truncatula]"		arahy.Tifrunner.gnm1.ann1.YL8857.1	300	T	"membrane-associated 30 kDa protein, chloroplastic isoform X1 [Arachis duranensis]"		arahy.Tifrunner.gnm1.ann1.4I03R9.2	17	S	thylakoid membrane protein slr0575 [Arachis ipaensis]		arahy.Tifrunner.gnm1.ann1.7WKR24.1	eukaryotic translation initiation factor 4G-like isoform X1 [Arachis duranensis]
arahy.Tifrunner.gnm1.ann1.RT0S28.1	761	S	epidermal growth factor receptor substrate 15-like 1 isoform X1 [Arachis ipaensis]		arahy.Tifrunner.gnm1.ann1.8GCY61.1	253	S	protein CUP-SHAPED COTYLEDON 3-like [Arachis duranensis]		arahy.Tifrunner.gnm1.ann1.4I8WV5.1	123	S	ninja-family protein mc410 isoform X1 [Arachis duranensis]		arahy.Tifrunner.gnm1.ann1.7WMI9V.1	EIN3-binding F-box protein 2-like [Arachis ipaensis]
arahy.Tifrunner.gnm1.ann1.KB83YE.1	137	S	tobamovirus multiplication protein 1 isoform X2 [Arachis duranensis]		arahy.Tifrunner.gnm1.ann1.VJWP7R.2	29	S	programmed cell death protein 4-like [Vigna radiata var. radiata]		arahy.Tifrunner.gnm1.ann1.4KB8BX.2	3	S	lysine histidine transporter 2-like [Arachis ipaensis]		arahy.Tifrunner.gnm1.ann1.7X1Y1S.1	HMG-Y-related protein A-like [Arachis ipaensis]
arahy.Tifrunner.gnm1.ann1.U4QIQ0.1	6	S	random slug protein 5 [Arachis duranensis]		arahy.Tifrunner.gnm1.ann1.6TJY4I.2	632	S	"pumilio homolog 6, chloroplastic-like [Arachis duranensis]"		arahy.Tifrunner.gnm1.ann1.4L72G1.2	178	S	clathrin interactor EPSIN 1 [Arachis ipaensis]		arahy.Tifrunner.gnm1.ann1.7Z6R16.1	"polyphenol oxidase, chloroplastic-like [Arachis duranensis]"
arahy.Tifrunner.gnm1.ann1.63GP52.1	18	T	"chlorophyll a-b binding protein CP29.3, chloroplastic [Arachis ipaensis]"		arahy.Tifrunner.gnm1.ann1.E8CC8A.1	13	S	phosphoenolpyruvate carboxylase 2 [Arachis duranensis]		arahy.Tifrunner.gnm1.ann1.4L72G1.2	180	S	clathrin interactor EPSIN 1 [Arachis ipaensis]		arahy.Tifrunner.gnm1.ann1.7ZG50Z.1	"asparagine--tRNA ligase, cytoplasmic 2 [Arachis duranensis]"
arahy.Tifrunner.gnm1.ann1.18SBFH.2	367	S	zinc finger CCCH domain-containing protein 18-like [Arachis duranensis]		arahy.Tifrunner.gnm1.ann1.VT3Q0W.1	176	S	DUF1677 family protein [Medicago truncatula]		arahy.Tifrunner.gnm1.ann1.4L72G1.2	195	S	clathrin interactor EPSIN 1 [Arachis ipaensis]		arahy.Tifrunner.gnm1.ann1.810EMS.2	ABC transporter G family member 22-like [Arachis duranensis]
arahy.Tifrunner.gnm1.ann1.X0ULI9.1	129	S	serine/threonine-protein kinase D6PKL2-like [Arachis duranensis]		arahy.Tifrunner.gnm1.ann1.4Y3JNF.1	165	S	cytoplasmic membrane protein [Medicago truncatula]		arahy.Tifrunner.gnm1.ann1.4L72G1.2	242	S	clathrin interactor EPSIN 1 [Arachis ipaensis]		arahy.Tifrunner.gnm1.ann1.81342Q.1	UPF0695 membrane protein C977.11/PB8B6.06c [Arachis ipaensis]
arahy.Tifrunner.gnm1.ann1.IGC1S7.3	478	S	5'-3' exoribonuclease 3 isoform X2 [Arachis duranensis]		arahy.Tifrunner.gnm1.ann1.YP465N.1	42	S	"pyruvate kinase 1, cytosolic [Arachis duranensis]"		arahy.Tifrunner.gnm1.ann1.4L72G1.2	509	S	clathrin interactor EPSIN 1 [Arachis ipaensis]		arahy.Tifrunner.gnm1.ann1.827X5P.1	DUF810 family protein [Medicago truncatula]
arahy.Tifrunner.gnm1.ann1.54B16H.1	658	S	boron transporter 1-like isoform X2 [Arachis ipaensis]		arahy.Tifrunner.gnm1.ann1.IX7PWC.1	6	S	ICE-like protease p20 domain protein [Medicago truncatula]		arahy.Tifrunner.gnm1.ann1.4L72G1.2	575	S	clathrin interactor EPSIN 1 [Arachis ipaensis]		arahy.Tifrunner.gnm1.ann1.82UWY2.1	heat shock cognate 70 kDa protein 2-like [Arachis ipaensis]
arahy.Tifrunner.gnm1.ann1.H8Y7P7.2	317	S	serine/arginine-rich splicing factor 4-like [Arachis duranensis]		arahy.Tifrunner.gnm1.ann1.QG5LTR.1	12	S	fe-S cluster assembly protein DRE2-like isoform X2 [Arachis ipaensis]		arahy.Tifrunner.gnm1.ann1.4L72G1.2	577	S	clathrin interactor EPSIN 1 [Arachis ipaensis]		arahy.Tifrunner.gnm1.ann1.8420T1	pto-interacting protein 1-like [Arachis ipaensis]
arahy.Tifrunner.gnm1.ann1.Y0NS3Z.3	156	S	transmembrane protein 18-like isoform X1 [Arachis duranensis]		arahy.Tifrunner.gnm1.ann1.16GZH2.1	124	S	lysine-rich arabinogalactan protein 19-like [Arachis duranensis]		arahy.Tifrunner.gnm1.ann1.4MQU62	386	S	protein STRUBBELIG-RECEPTOR FAMILY 7-like [Arachis duranensis]		arahy.Tifrunner.gnm1.ann1.84FHQN.1	epidermal growth factor receptor substrate 15-like 1 isoform X1 [Arachis duranensis]
arahy.Tifrunner.gnm1.ann1.U5RNGH.1	160	S	B3 domain-containing protein REM16-like [Arachis duranensis]		arahy.Tifrunner.gnm1.ann1.2X8VUU.1	241	S	hydroxyacylglutathione hydrolase cytoplasmic [Arachis ipaensis]		arahy.Tifrunner.gnm1.ann1.4MQU62	405	S	protein STRUBBELIG-RECEPTOR FAMILY 7-like [Arachis duranensis]		arahy.Tifrunner.gnm1.ann1.84JEJ8.3	mitogen-activated protein kinase kinase 2 [Arachis ipaensis]
arahy.Tifrunner.gnm1.ann1.X88BGH.1	7	S	"outer envelope pore protein 16, chloroplastic isoform X2 [Arachis ipaensis]"		arahy.Tifrunner.gnm1.ann1.JDZ0RF.2	698	S	LOW QUALITY PROTEIN: ABC transporter B family member 20-like [Arachis duranensis]		arahy.Tifrunner.gnm1.ann1.4MQU62	713	S	protein STRUBBELIG-RECEPTOR FAMILY 7-like [Arachis duranensis]		arahy.Tifrunner.gnm1.ann1.84QBSM.1	TMV resistance protein N-like [Arachis ipaensis]
arahy.Tifrunner.gnm1.ann1.P6P9CF.1	3319	S	GYF domain protein [Medicago truncatula]		arahy.Tifrunner.gnm1.ann1.AB1T8P.3	173	S	transcription elongation factor TFIIS [Arachis ipaensis]		arahy.Tifrunner.gnm1.ann1.4MQU62	718	S	protein STRUBBELIG-RECEPTOR FAMILY 7-like [Arachis duranensis]		arahy.Tifrunner.gnm1.ann1.84W2TN.2	tubby-like F-box protein 8 [Arachis duranensis]
arahy.Tifrunner.gnm1.ann1.P6P9CF.1	1465	S	GYF domain protein [Medicago truncatula]		arahy.Tifrunner.gnm1.ann1.W4CT0I.1	14	T	calmodulin-binding receptor-like cytoplasmic kinase 2 [Arachis ipaensis]		arahy.Tifrunner.gnm1.ann1.4MXC2X.1	9	S	photosystem I P700 chlorophyll a apoprotein A2 (chloroplast) [Juglans regia]		arahy.Tifrunner.gnm1.ann1.8578L4.1	nuclear pore complex protein GP210 [Arachis duranensis]
arahy.Tifrunner.gnm1.ann1.FX07CR.1	308	S	serine hydroxymethyltransferase 4 [Arachis ipaensis]		arahy.Tifrunner.gnm1.ann1.X02Y3Q.1	31	S	programmed cell death protein 4-like [Cicer arietinum]		arahy.Tifrunner.gnm1.ann1.4N7RM1	362	S	protein SCAR3-like [Arachis duranensis]		arahy.Tifrunner.gnm1.ann1.858FV1	protein BOBBER 1 [Arachis duranensis]
arahy.Tifrunner.gnm1.ann1.6GE0SS.1	75	S	phytochrome E-like isoform X2 [Arachis ipaensis]		arahy.Tifrunner.gnm1.ann1.KDE77Y.4	236	S	pumilio homolog 2-like [Arachis ipaensis]		arahy.Tifrunner.gnm1.ann1.4N7RM1	636	S	protein SCAR3-like [Arachis duranensis]		arahy.Tifrunner.gnm1.ann1.85J3HU.1	histone H1-like [Arachis ipaensis]
arahy.Tifrunner.gnm1.ann1.ZQ0E46.1	218	S	SNAP25 homologous protein SNAP33-like [Arachis duranensis]		arahy.Tifrunner.gnm1.ann1.2FK0GQ.2	392	S	nucleotidyltransferase [Medicago truncatula]		arahy.Tifrunner.gnm1.ann1.4N7RM1	642	S	protein SCAR3-like [Arachis duranensis]		arahy.Tifrunner.gnm1.ann1.85LIYI.1	riboflavin synthase-like [Arachis duranensis]
arahy.Tifrunner.gnm1.ann1.ZLH3PG.3	1689	S	agenet domain protein [Medicago truncatula]		arahy.Tifrunner.gnm1.ann1.YSSX7I.1	221	S	probable histone-lysine N-methyltransferase set-2 isoform X3 [Cajanus cajan]		arahy.Tifrunner.gnm1.ann1.4P5PR1	138	S	nucleolin 2 isoform X1 [Glycine max]		arahy.Tifrunner.gnm1.ann1.85NTL1	serine/threonine-protein kinase CTR1-like [Arachis duranensis]
arahy.Tifrunner.gnm1.ann1.W4Y87I.1	356	S	protein STRUBBELIG-RECEPTOR FAMILY 8 [Arachis ipaensis]		arahy.Tifrunner.gnm1.ann1.5DM86W.2	446	S	serine/threonine-protein kinase BLUS1-like [Arachis ipaensis]		arahy.Tifrunner.gnm1.ann1.4P5PR1	141	S	nucleolin 2 isoform X1 [Glycine max]		arahy.Tifrunner.gnm1.ann1.85Z4HY.1	"transmembrane protein, putative [Medicago truncatula]"
arahy.Tifrunner.gnm1.ann1.CE4N6Q.1	121	S	serine/threonine-protein kinase STE20-like isoform X1 [Arachis duranensis]		arahy.Tifrunner.gnm1.ann1.00VL53.1	639	T	probable inactive receptor kinase At2g26730 [Arachis ipaensis]		arahy.Tifrunner.gnm1.ann1.4P5PR2	463	S	nucleolin 2 isoform X1 [Glycine max]		arahy.Tifrunner.gnm1.ann1.860WY5.2	protein DOWNY MILDEW RESISTANCE 6 [Arachis ipaensis]
arahy.Tifrunner.gnm1.ann1.N38075.1	361	S	"putative 3,4-dihydroxy-2-butanone kinase isoform X1 [Arachis duranensis]"		arahy.Tifrunner.gnm1.ann1.03CHBD.1	48	T	IRK-interacting protein [Arachis ipaensis]		arahy.Tifrunner.gnm1.ann1.4P5PR3	138	S	nucleolin 2 isoform X2 [Glycine max]		arahy.Tifrunner.gnm1.ann1.861X9K.2	protein EFR3 homolog B-like isoform X2 [Arachis ipaensis]
arahy.Tifrunner.gnm1.ann1.EMJ2JU.1	47	S	"chlorophyll a-b binding protein 215, chloroplastic [Arachis ipaensis]"		arahy.Tifrunner.gnm1.ann1.GED73I.1	182	S	inactive leucine-rich repeat receptor-like protein kinase CORYNE isoform X2 [Arachis ipaensis]		arahy.Tifrunner.gnm1.ann1.4P5PR3	141	S	nucleolin 2 isoform X2 [Glycine max]		arahy.Tifrunner.gnm1.ann1.86BA7N.3	NADP-specific glutamate dehydrogenase-like isoform X1 [Arachis ipaensis]
arahy.Tifrunner.gnm1.ann1.WGP01G.2	89	S	microtubule-associated protein futsch-like isoform X2 [Gossypium hirsutum]		arahy.Tifrunner.gnm1.ann1.YVP0PI.1	418	S	probable inactive leucine-rich repeat receptor-like protein kinase At1g66830 [Arachis ipaensis]		arahy.Tifrunner.gnm1.ann1.4PH81Y.1	309	S	putative RING-H2 finger protein ATL21A [Arachis ipaensis]		arahy.Tifrunner.gnm1.ann1.86F2TK.1	"chlorophyll a-b binding protein 8, chloroplastic [Arachis ipaensis]"
arahy.Tifrunner.gnm1.ann1.ULK9GC.1	316	S	lysM domain receptor-like kinase 3 [Arachis duranensis]		arahy.Tifrunner.gnm1.ann1.BGF2TK.1	99	S	"digalactosyldiacylglycerol synthase 1, chloroplastic [Arachis ipaensis]"		arahy.Tifrunner.gnm1.ann1.4PHK1T.4	115	S	probable serine/threonine protein phosphatase 2A regulatory subunit B''delta [Arachis duranensis]		arahy.Tifrunner.gnm1.ann1.86F2TK.2	N-alpha-acetyltransferase 50 [Arachis ipaensis]
arahy.Tifrunner.gnm1.ann1.A6P7Y5.2	194	T	uncharacterized transporter YBR287W-like [Arachis ipaensis]		arahy.Tifrunner.gnm1.ann1.7AZW9Z.2	143	S	"50S ribosomal protein L1, chloroplastic isoform X2 [Arachis ipaensis]"		arahy.Tifrunner.gnm1.ann1.4PM453.4	572	S	protein MON2 homolog [Arachis ipaensis]		arahy.Tifrunner.gnm1.ann1.86R49N.1	D-xylose-proton symporter-like 2 isoform X1 [Arachis duranensis]
arahy.Tifrunner.gnm1.ann1.Z2MV1Y.1	1552	S	brefeldin A-inhibited guanine nucleotide-exchange protein 5 [Arachis ipaensis]		arahy.Tifrunner.gnm1.ann1.WXC3CC.3	26	S	soluble inorganic pyrophosphatase [Arachis ipaensis]		arahy.Tifrunner.gnm1.ann1.4PM453.4	1290	S	protein MON2 homolog [Arachis ipaensis]		arahy.Tifrunner.gnm1.ann1.882I61	40S ribosomal protein S15-4-like [Arachis duranensis]
arahy.Tifrunner.gnm1.ann1.LC98AP.2	11	S	sucrose synthase [Arachis duranensis]		arahy.Tifrunner.gnm1.ann1.71AIDN.2	85	S	splicing regulatory glutamine/lysine-rich protein 1 isoform X1 [Arachis ipaensis]		arahy.Tifrunner.gnm1.ann1.4RYA37.1	16	S	protein LIGHT-DEPENDENT SHORT HYPOCOTYLS 10-like [Arachis ipaensis]		arahy.Tifrunner.gnm1.ann1.88B2E3	protein BONZAI 1-like [Arachis duranensis]
arahy.Tifrunner.gnm1.ann1.CU2P0Q.2	157	S	G2/mitotic-specific cyclin S13-7 [Arachis duranensis]		arahy.Tifrunner.gnm1.ann1.W2DQVT.2	204	T	peroxisomal membrane protein PEX14-like isoform X1 [Arachis duranensis]		arahy.Tifrunner.gnm1.ann1.4SLH22	223	S	probable receptor-like protein kinase At5g18500 isoform X1 [Arachis ipaensis]		arahy.Tifrunner.gnm1.ann1.88CVAX.1	topless-related protein 3 [Arachis duranensis]
arahy.Tifrunner.gnm1.ann1.TI9N5S.1	56	S	BSD domain-containing family protein [Populus trichocarpa]		arahy.Tifrunner.gnm1.ann1.VBG525.1	396	S	armadillo repeat only protein [Medicago truncatula]		arahy.Tifrunner.gnm1.ann1.4T6VK1.1	6	S	protein OBERON 4 [Arachis ipaensis]		arahy.Tifrunner.gnm1.ann1.88FPG1.1	zinc finger CCCH domain-containing protein 13-like isoform X2 [Vigna radiata var. radiata]
arahy.Tifrunner.gnm1.ann1.7FJL8T.2	87	S	splicing factor U2af large subunit A-like isoform X2 [Vigna radiata var. radiata]		arahy.Tifrunner.gnm1.ann1.W3VJBC.1	554	S	ethylene-insensitive protein 2-like [Arachis duranensis]		arahy.Tifrunner.gnm1.ann1.4T6VK1.1	29	S	protein OBERON 4 [Arachis ipaensis]		arahy.Tifrunner.gnm1.ann1.88HTN6.1	26S proteasome non-ATPase regulatory subunit 4 homolog [Arachis ipaensis]
arahy.Tifrunner.gnm1.ann1.J2ZA2N.1	392	S	casein kinase I-like [Arachis duranensis]		arahy.Tifrunner.gnm1.ann1.7F1JQP.1	10	S	ABA-responsive protein ABR17-like [Arachis ipaensis]		arahy.Tifrunner.gnm1.ann1.4T6VK1.1	183	S	protein OBERON 4 [Arachis ipaensis]		arahy.Tifrunner.gnm1.ann1.88IXK8.1	transcription initiation factor TFIID subunit 4b isoform X3 [Arachis duranensis]
arahy.Tifrunner.gnm1.ann1.GJS7Q8.1	25	S	dnaJ protein homolog [Arachis ipaensis]		arahy.Tifrunner.gnm1.ann1.39P5NE.1	29	S	187-kDa microtubule-associated protein AIR9 [Arachis duranensis]		arahy.Tifrunner.gnm1.ann1.4T6VK1.1	187	S	protein OBERON 4 [Arachis ipaensis]		arahy.Tifrunner.gnm1.ann1.895WI1	AAA-ATPase At3g50940-like [Arachis ipaensis]
arahy.Tifrunner.gnm1.ann1.G9KXLY.2	419	S	serine/threonine-protein kinase At5g01020-like [Arachis ipaensis]		arahy.Tifrunner.gnm1.ann1.PSKN5N.1	423	S	E3 ubiquitin-protein ligase TRAIP-like [Arachis duranensis]		arahy.Tifrunner.gnm1.ann1.4T6VK1.1	237	S	protein OBERON 4 [Arachis ipaensis]		arahy.Tifrunner.gnm1.ann1.897SEY.1	filaggrin [Arachis duranensis]
arahy.Tifrunner.gnm1.ann1.AD012R.1	50	T	protein NRT1/ PTR FAMILY 6.1 [Arachis ipaensis]		arahy.Tifrunner.gnm1.ann1.GD0F1M.1	235	S	protease Do-like 7 isoform X2 [Cucumis melo]		arahy.Tifrunner.gnm1.ann1.4T6VK1.1	719	S	protein OBERON 4 [Arachis ipaensis]		arahy.Tifrunner.gnm1.ann1.89L395.3	DUF21 domain-containing protein At2g14520-like [Arachis duranensis]
arahy.Tifrunner.gnm1.ann1.173QHH.1	48	S	1-aminocyclopropane-1-carboxylate oxidase homolog 1-like [Arachis ipaensis]		arahy.Tifrunner.gnm1.ann1.84QBSM.1	254	S	TMV resistance protein N-like [Arachis ipaensis]		arahy.Tifrunner.gnm1.ann1.4XM3SI.1	416	S	protein transport protein SEC16B homolog [Arachis ipaensis]		arahy.Tifrunner.gnm1.ann1.8B5AYJ.1	YTH domain-containing family protein 3 [Arachis duranensis]
arahy.Tifrunner.gnm1.ann1.4L72G1.2	178	S	clathrin interactor EPSIN 1 [Arachis ipaensis]		arahy.Tifrunner.gnm1.ann1.6MS3W4.1	81	S	"2,3-bisphosphoglycerate-independent phosphoglycerate mutase [Arachis ipaensis]"		arahy.Tifrunner.gnm1.ann1.4XM3SI.1	1070	S	protein transport protein SEC16B homolog [Arachis ipaensis]		arahy.Tifrunner.gnm1.ann1.8B7VWK.2	sugar transporter ERD6-like 6 [Arachis ipaensis]
arahy.Tifrunner.gnm1.ann1.L76SLB.1	221	S	auxin efflux carrier component 1 [Arachis duranensis]		arahy.Tifrunner.gnm1.ann1.PAAG12.2	169	T	vesicle-associated membrane protein 711 [Arachis duranensis]		arahy.Tifrunner.gnm1.ann1.4XM3SI.1	1077	S	protein transport protein SEC16B homolog [Arachis ipaensis]		arahy.Tifrunner.gnm1.ann1.8BN0D1	ATP-dependent helicase BRM-like [Arachis ipaensis]
arahy.Tifrunner.gnm1.ann1.ZE7QP6.1	312	T	protein IQ-DOMAIN 14 isoform X1 [Arachis duranensis]		arahy.Tifrunner.gnm1.ann1.J1CFJJ.1	180	S	transcription factor TGA6 isoform X1 [Arachis duranensis]		arahy.Tifrunner.gnm1.ann1.4Y3JN1	165	S	cytoplasmic membrane protein [Medicago truncatula]		arahy.Tifrunner.gnm1.ann1.8DRC0W.1	thylakoid soluble phosphoprotein TSP9 protein [Medicago truncatula]
arahy.Tifrunner.gnm1.ann1.V6C9BH.1	1184	S	GYF domain protein [Medicago truncatula]		arahy.Tifrunner.gnm1.ann1.9HQ4ZM.1	700	S	catalytic/pyridoxal phosphate-binding protein [Medicago truncatula]		arahy.Tifrunner.gnm1.ann1.4Y3JN1	175	S	cytoplasmic membrane protein [Medicago truncatula]		arahy.Tifrunner.gnm1.ann1.8F6M4K.1	senescence regulator [Medicago truncatula]
arahy.Tifrunner.gnm1.ann1.SN2AIN.1	99	S	"glycine-rich RNA-binding, abscisic acid-inducible protein-like [Arachis ipaensis]"		arahy.Tifrunner.gnm1.ann1.JL30IG.1	291	S	Rgp1 protein [Medicago truncatula]		arahy.Tifrunner.gnm1.ann1.4Y5XN1	182	S	universal stress protein A-like protein [Arachis ipaensis]		arahy.Tifrunner.gnm1.ann1.8FZ8QS.1	RanBP1 domain protein [Medicago truncatula]
arahy.Tifrunner.gnm1.ann1.CKNT4J.2	735	S	regulator of chromosome condensation (RCC1) family protein [Medicago truncatula]		arahy.Tifrunner.gnm1.ann1.Y5ZQX8.2	469	S	autophagy-related protein 13b [Arachis duranensis]		arahy.Tifrunner.gnm1.ann1.4Z5MSS.1	733	S	villin-2 isoform X2 [Arachis ipaensis]		arahy.Tifrunner.gnm1.ann1.8G1XAU.1	probable RNA-binding protein ARP1 isoform X1 [Arachis ipaensis]
arahy.Tifrunner.gnm1.ann1.SLD6BY.2	346	S	probable protein S-acyltransferase 7 isoform X2 [Arachis ipaensis]		arahy.Tifrunner.gnm1.ann1.7M06WQ.1	328	S	protein WVD2-like 2 [Arachis ipaensis]		arahy.Tifrunner.gnm1.ann1.4Z5MSS.1	850	S	villin-2 isoform X2 [Arachis ipaensis]		arahy.Tifrunner.gnm1.ann1.8G5UYU.1	PHD finger protein ING1-like [Arachis duranensis]
arahy.Tifrunner.gnm1.ann1.T0GB9L.1	387	S	auxilin-related protein 2-like [Arachis duranensis]		arahy.Tifrunner.gnm1.ann1.MX792F.1	471	S	chitin elicitor receptor kinase 1-like [Arachis duranensis]		arahy.Tifrunner.gnm1.ann1.4Z5MSS.1	860	S	villin-2 isoform X2 [Arachis ipaensis]		arahy.Tifrunner.gnm1.ann1.8GCY61.1	protein CUP-SHAPED COTYLEDON 3-like [Arachis duranensis]
arahy.Tifrunner.gnm1.ann1.AVGT3S.2	112	S	polyadenylate-binding protein 8 [Arachis duranensis]		arahy.Tifrunner.gnm1.ann1.VDB3CB.1	1079	S	CW-type zinc-finger protein [Medicago truncatula]		arahy.Tifrunner.gnm1.ann1.4Z5MSS.1	877	S	villin-2 isoform X2 [Arachis ipaensis]		arahy.Tifrunner.gnm1.ann1.8H8JU1	serine/arginine-rich splicing factor RS40 isoform X1 [Arachis duranensis]
arahy.Tifrunner.gnm1.ann1.TIZ9RP.5	334	S	diacylglycerol kinase 1 [Arachis duranensis]		arahy.Tifrunner.gnm1.ann1.8U507W.1	65	S	type II inositol polyphosphate 5-phosphatase 15-like isoform X1 [Arachis ipaensis]		arahy.Tifrunner.gnm1.ann1.4Z5MSS.1	895	S	villin-2 isoform X2 [Arachis ipaensis]		arahy.Tifrunner.gnm1.ann1.8HY8BZ.1	zinc-finger homeodomain protein 1-like [Arachis duranensis]
arahy.Tifrunner.gnm1.ann1.LT4L2L.1	65	S	"protein CHUP1, chloroplastic isoform X1 [Arachis ipaensis]"		arahy.Tifrunner.gnm1.ann1.SFTJ5P.1	624	S	zinc finger CCCH domain-containing protein 29 [Arachis ipaensis]		arahy.Tifrunner.gnm1.ann1.4Z5MSS.1	925	S	villin-2 isoform X2 [Arachis ipaensis]		arahy.Tifrunner.gnm1.ann1.8JFH41	autophagy-related protein 18a [Arachis ipaensis]
arahy.Tifrunner.gnm1.ann1.N565XM.2	211	T	zinc finger CCCH domain-containing protein 38-like [Arachis duranensis]		arahy.Tifrunner.gnm1.ann1.HMW6IE.2	149	S	serine/arginine-rich SC35-like splicing factor SCL33 [Arachis duranensis]		arahy.Tifrunner.gnm1.ann1.5041YP.1	351	S	probable WRKY transcription factor 32 isoform X2 [Arachis duranensis]		arahy.Tifrunner.gnm1.ann1.8JQ024.2	ubiquitin carboxyl-terminal hydrolase 13-like isoform X1 [Arachis ipaensis]
arahy.Tifrunner.gnm1.ann1.J7B49U.1	10	S	"transmembrane protein, putative [Medicago truncatula]"		arahy.Tifrunner.gnm1.ann1.EC4CEA.1	712	S	CSC1-like protein ERD4 [Arachis ipaensis]		arahy.Tifrunner.gnm1.ann1.50BPU8.2	1286	S	DNA-directed RNA polymerase V subunit 1 isoform X2 [Arachis ipaensis]		arahy.Tifrunner.gnm1.ann1.8K3Y1X.3	RNA-binding protein 39 [Arachis duranensis]
arahy.Tifrunner.gnm1.ann1.TJR5LV.2	2908	S	chromatin structure-remodeling complex protein SYD-like isoform X3 [Arachis duranensis]		arahy.Tifrunner.gnm1.ann1.RP0H42.2	157	S	RPM1-interacting protein 4-like [Arachis duranensis]		arahy.Tifrunner.gnm1.ann1.50NPJN.1	321	S	auxilin-related protein 2-like [Arachis duranensis]		arahy.Tifrunner.gnm1.ann1.8KD3C5.1	exocyst complex component SEC5B-like isoform X1 [Arachis ipaensis]
arahy.Tifrunner.gnm1.ann1.XKSF6X.1	339	S	RNA-binding (RRM/RBD/RNP motif) family protein [Medicago truncatula]		arahy.Tifrunner.gnm1.ann1.RF6BAC.1	14	S	epsin-3-like [Arachis ipaensis]		arahy.Tifrunner.gnm1.ann1.50NPJN.1	323	S	auxilin-related protein 2-like [Arachis duranensis]		arahy.Tifrunner.gnm1.ann1.8KGI2U.2	RING finger protein B-like isoform X1 [Cicer arietinum]
arahy.Tifrunner.gnm1.ann1.UA6XT5.1	5	T	uncharacterized vacuolar membrane protein YML018C-like isoform X1 [Arachis ipaensis]		arahy.Tifrunner.gnm1.ann1.V4I9JE.1	130	S	"transmembrane protein, putative [Medicago truncatula]"		arahy.Tifrunner.gnm1.ann1.50NPJN.1	329	S	auxilin-related protein 2-like [Arachis duranensis]		arahy.Tifrunner.gnm1.ann1.8L2WFM.1
arahy.Tifrunner.gnm1.ann1.VZZ6TG.1	11	S	high affinity nitrate transporter 2.4 [Arachis duranensis]		arahy.Tifrunner.gnm1.ann1.SQZ1L0.1	219	S	"indole-3-glycerol phosphate synthase, chloroplastic-like [Arachis ipaensis]"		arahy.Tifrunner.gnm1.ann1.50NPJN.1	351	S	auxilin-related protein 2-like [Arachis duranensis]		arahy.Tifrunner.gnm1.ann1.8L38IN.1	"phosphoribulokinase, chloroplastic [Arachis duranensis]"
arahy.Tifrunner.gnm1.ann1.H1BIFD.1	287	S	heterogeneous nuclear ribonucleoprotein 1-like [Arachis ipaensis]		arahy.Tifrunner.gnm1.ann1.RIX96U.1	149	S	HMG-Y-related protein A-like [Arachis duranensis]		arahy.Tifrunner.gnm1.ann1.50NPJN.1	387	S	auxilin-related protein 2-like [Arachis duranensis]		arahy.Tifrunner.gnm1.ann1.8L40S2	probable serine/threonine-protein kinase DDB_G0276461 isoform X1 [Arachis duranensis]
arahy.Tifrunner.gnm1.ann1.U4ADFF.1	48	S	calcium/calmodulin-regulated receptor-like kinase 2 [Arachis duranensis]		arahy.Tifrunner.gnm1.ann1.01DGNM.1	283	S			arahy.Tifrunner.gnm1.ann1.50NPJN.1	473	S	auxilin-related protein 2-like [Arachis duranensis]		arahy.Tifrunner.gnm1.ann1.8L6PVU.3	cell division cycle 5-like protein [Arachis duranensis]
arahy.Tifrunner.gnm1.ann1.PUAG43.1	19	S	"calcium-transporting ATPase 4, endoplasmic reticulum-type-like [Arachis ipaensis]"		arahy.Tifrunner.gnm1.ann1.ZD0NI5.1	702	S	glycine-rich domain-containing protein 1 [Arachis duranensis]		arahy.Tifrunner.gnm1.ann1.50NPJN.1	752	S	auxilin-related protein 2-like [Arachis duranensis]		arahy.Tifrunner.gnm1.ann1.8M9DZW.1	"senescence/dehydration-associated protein At4g35985, chloroplastic-like [Lupinus angustifolius]"
arahy.Tifrunner.gnm1.ann1.54E44M.2	57	S	LOW QUALITY PROTEIN: probable serine/threonine-protein kinase At1g54610 [Arachis duranensis]		arahy.Tifrunner.gnm1.ann1.478ZG4.2	269	S	"aspartate--tRNA ligase 2, cytoplasmic [Arachis ipaensis]"		arahy.Tifrunner.gnm1.ann1.51INSQ.1	145	S	BSD domain-containing protein 1 [Arachis ipaensis]		arahy.Tifrunner.gnm1.ann1.8ME29W.2	calcium-dependent protein kinase-like [Arachis ipaensis]
arahy.Tifrunner.gnm1.ann1.FCRD5F.1	473	S	auxin efflux carrier component 4-like isoform X1 [Arachis ipaensis]		arahy.Tifrunner.gnm1.ann1.W1T8WI.1	4	S	101 kDa malaria antigen [Phoenix dactylifera]		arahy.Tifrunner.gnm1.ann1.51XJUZ.1	871	S	26S proteasome non-ATPase regulatory subunit 1 homolog A [Arachis ipaensis]		arahy.Tifrunner.gnm1.ann1.8MR9WY.1	transcription elongation factor SPT5-like [Erythranthe guttata]
arahy.Tifrunner.gnm1.ann1.CC2QWC.1	37	S	probable DNA double-strand break repair Rad50 ATPase [Arachis duranensis]		arahy.Tifrunner.gnm1.ann1.D93XQM.1	48	S	far upstream element-binding protein 2 isoform X2 [Arachis ipaensis]		arahy.Tifrunner.gnm1.ann1.51XJUZ.1	898	S	26S proteasome non-ATPase regulatory subunit 1 homolog A [Arachis ipaensis]		arahy.Tifrunner.gnm1.ann1.8NC760.1	"iron-sulfur assembly protein IscA-like 2, mitochondrial isoform X1 [Arachis duranensis]"
arahy.Tifrunner.gnm1.ann1.CE4N6Q.1	17	S	serine/threonine-protein kinase STE20-like isoform X1 [Arachis duranensis]		arahy.Tifrunner.gnm1.ann1.AM2AK0.1	66	T	clathrin heavy chain 1-like [Arachis ipaensis]		arahy.Tifrunner.gnm1.ann1.522STQ.1	222	S	BUD13 homolog [Arachis duranensis]		arahy.Tifrunner.gnm1.ann1.8PBE23.1	fumarylacetoacetase [Arachis ipaensis]
arahy.Tifrunner.gnm1.ann1.7T7KVP.1	220	S	LOW QUALITY PROTEIN: transcription elongation factor B polypeptide 3 [Arachis duranensis]		arahy.Tifrunner.gnm1.ann1.4Q9CQT.1	90	T	elongation factor 1-delta-like [Arachis ipaensis]		arahy.Tifrunner.gnm1.ann1.522STQ.1	231	S	BUD13 homolog [Arachis duranensis]		arahy.Tifrunner.gnm1.ann1.8R27D6.1	cell division cycle and apoptosis regulator protein 1 [Arachis duranensis]
arahy.Tifrunner.gnm1.ann1.LRKT77.1	133	S	vesicle-associated protein 1-2-like [Arachis duranensis]		arahy.Tifrunner.gnm1.ann1.EJC028.2	288	S	katanin p60 ATPase-containing subunit A-like 2 [Arachis duranensis]		arahy.Tifrunner.gnm1.ann1.52W6Q5.1	363	S	ankyrin repeat domain-containing protein 13C [Arachis ipaensis]		arahy.Tifrunner.gnm1.ann1.8R4GHU.1	YTH domain-containing family protein 1 isoform X2 [Arachis ipaensis]
arahy.Tifrunner.gnm1.ann1.QLR9MG.1	64	S	probable protein phosphatase 2C 27 [Arachis ipaensis]		arahy.Tifrunner.gnm1.ann1.1U7IT4.1	351	S	J domain-containing protein required for chloroplast accumulation response 1 [Arachis duranensis]		arahy.Tifrunner.gnm1.ann1.53Z6YZ.1	237	S	flocculation protein FLO11-like isoform X2 [Arachis ipaensis]		arahy.Tifrunner.gnm1.ann1.8SJW9U.2	serine/threonine-protein kinase STE20-like isoform X1 [Arachis duranensis]
arahy.Tifrunner.gnm1.ann1.RRC04T.1	303	S	respiratory burst oxidase homolog protein B [Arachis ipaensis]		arahy.Tifrunner.gnm1.ann1.5RAP3T.1	1195	S	pre-mRNA-processing factor 17 [Arachis ipaensis]		arahy.Tifrunner.gnm1.ann1.549WES.1	107	S	protein tesmin/TSO1-like CXC 5 [Arachis ipaensis]		arahy.Tifrunner.gnm1.ann1.8SQ1RZ.1	copper methylamine oxidase-like [Arachis duranensis]
arahy.Tifrunner.gnm1.ann1.97SJFR.1	287	S	phospholipid-transporting ATPase 2 [Arachis duranensis]		arahy.Tifrunner.gnm1.ann1.XLY65R.2	197	S	ADP-ribosylation factor GTPase-activating protein AGD7-like [Arachis ipaensis]		arahy.Tifrunner.gnm1.ann1.549WES.1	190	S	protein tesmin/TSO1-like CXC 5 [Arachis ipaensis]		arahy.Tifrunner.gnm1.ann1.8T0CRQ.1	"copper-transporting ATPase PAA1, chloroplastic [Arachis ipaensis]"
arahy.Tifrunner.gnm1.ann1.ILCZ5C.3	335	S	serine/threonine-protein phosphatase PP1 [Arachis ipaensis]		arahy.Tifrunner.gnm1.ann1.L1PMVE.1	1002	S	BAH domain-containing protein [Medicago truncatula]		arahy.Tifrunner.gnm1.ann1.54B161	670	S	boron transporter 1-like isoform X2 [Arachis ipaensis]		arahy.Tifrunner.gnm1.ann1.8T4WX3	high mobility group nucleosome-binding domain-containing protein 5-like [Arachis ipaensis]
arahy.Tifrunner.gnm1.ann1.H0TFP9.1	76	S	serine/threonine-protein kinase HT1-like [Arachis duranensis]		arahy.Tifrunner.gnm1.ann1.RY2Y1Z.1	29	T	auxin-repressed 12.5 kDa protein-like [Arachis ipaensis]		arahy.Tifrunner.gnm1.ann1.54B161	671	S	boron transporter 1-like isoform X2 [Arachis ipaensis]		arahy.Tifrunner.gnm1.ann1.8TQ0W2.1	A-kinase anchor protein 17A-like [Arachis duranensis]
arahy.Tifrunner.gnm1.ann1.7J7UQ4.2	50	S	probable alkaline/neutral invertase D [Arachis duranensis]		arahy.Tifrunner.gnm1.ann1.MSPK9F.2	396	S	zinc finger CCCH domain-containing protein ZFN-like [Arachis ipaensis]		arahy.Tifrunner.gnm1.ann1.54B161	690	S	boron transporter 1-like isoform X2 [Arachis ipaensis]		arahy.Tifrunner.gnm1.ann1.8U507W.1	type II inositol polyphosphate 5-phosphatase 15-like isoform X1 [Arachis ipaensis]
arahy.Tifrunner.gnm1.ann1.IJVD3H.2	205	T	cyclin-dependent kinase C-2-like [Glycine max]		arahy.Tifrunner.gnm1.ann1.U4VKB6.1	16	S	KH domain-containing protein At3g08620 [Arachis ipaensis]		arahy.Tifrunner.gnm1.ann1.54B161	694	S	boron transporter 1-like isoform X2 [Arachis ipaensis]		arahy.Tifrunner.gnm1.ann1.8UC4TV.2	TIR class disease resistance protein [Medicago truncatula]
arahy.Tifrunner.gnm1.ann1.W5XP03.2	776	S	RNA polymerase II C-terminal domain phosphatase-like 3 isoform X2 [Arachis ipaensis]		arahy.Tifrunner.gnm1.ann1.EY3S6Y.3	403	S	serine/threonine-protein kinase CDL1 [Arachis ipaensis]		arahy.Tifrunner.gnm1.ann1.54B161	705	S	boron transporter 1-like isoform X2 [Arachis ipaensis]		arahy.Tifrunner.gnm1.ann1.8WK6C3.1	serine/threonine-protein kinase EDR1 [Erythranthe guttata]
arahy.Tifrunner.gnm1.ann1.VF4M4N.5	85	S	E3 ubiquitin-protein ligase KEG [Arachis ipaensis]		arahy.Tifrunner.gnm1.ann1.LKD1IW.1	430	S	DDT domain-containing protein DDR4-like [Arachis ipaensis]		arahy.Tifrunner.gnm1.ann1.54B161	709	S	boron transporter 1-like isoform X2 [Arachis ipaensis]		arahy.Tifrunner.gnm1.ann1.8X00QX.1	scarecrow-like protein 34 [Arachis duranensis]
arahy.Tifrunner.gnm1.ann1.99PJJG.1	356	S	probable transcription factor PosF21 [Arachis ipaensis]		arahy.Tifrunner.gnm1.ann1.2YXT8K.4	341	T	mitogen-activated protein kinase kinase kinase YODA-like [Arachis duranensis]		arahy.Tifrunner.gnm1.ann1.54E44M.2	57	S	LOW QUALITY PROTEIN: probable serine/threonine-protein kinase At1g54610 [Arachis duranensis]		arahy.Tifrunner.gnm1.ann1.8X014Y.1	topless-related protein 1-like isoform X1 [Arachis duranensis]
arahy.Tifrunner.gnm1.ann1.R0SDX6.2	67	S	flowering time control protein FCA-like [Arachis ipaensis]		arahy.Tifrunner.gnm1.ann1.V729I7.1	1039	S	brefeldin A-inhibited guanine nucleotide-exchange protein 2-like [Arachis ipaensis]		arahy.Tifrunner.gnm1.ann1.5539WM.1	42	S	mitochondrial import inner membrane translocase subunit TIM17-2-like [Arachis duranensis]		arahy.Tifrunner.gnm1.ann1.8X2EGT.1	"glucose-1-phosphate adenylyltransferase large subunit 1, chloroplastic isoform X2 [Arachis duranensis]"
arahy.Tifrunner.gnm1.ann1.B5VTGG.2	85	S	splicing factor U2af large subunit B-like [Arachis ipaensis]		arahy.Tifrunner.gnm1.ann1.MWA09F.2	323	S	serrate RNA effector molecule [Arachis ipaensis]		arahy.Tifrunner.gnm1.ann1.55ZT83.1	147	S	GBF-interacting protein 1-like [Arachis ipaensis]		arahy.Tifrunner.gnm1.ann1.8X7RIN.2	DUF21 domain-containing protein At1g47330 [Arachis ipaensis]
arahy.Tifrunner.gnm1.ann1.GY6ZBB.2	280	S	protein NUCLEAR FUSION DEFECTIVE 4-like [Arachis ipaensis]		arahy.Tifrunner.gnm1.ann1.93GJX5.3	239	S	cyclin-dependent kinase G-2 [Arachis duranensis]		arahy.Tifrunner.gnm1.ann1.56NXYI.1	306	S	probable serine incorporator [Arachis ipaensis]		arahy.Tifrunner.gnm1.ann1.8XU14N.1	cell wall protein RBR3 [Arachis duranensis]
arahy.Tifrunner.gnm1.ann1.21Z9DD.1	793	S	ABC1 family protein [Arabidopsis lyrata subsp. lyrata]		arahy.Tifrunner.gnm1.ann1.EA9INV.1	196	T	protein WVD2-like 2 [Arachis ipaensis]		arahy.Tifrunner.gnm1.ann1.56NXYI.1	310	S	probable serine incorporator [Arachis ipaensis]		arahy.Tifrunner.gnm1.ann1.8XV151.1	stress response protein nst1-like [Arachis ipaensis]
arahy.Tifrunner.gnm1.ann1.YJZ5EZ.1	201	S	protein FREE1-like [Arachis duranensis]		arahy.Tifrunner.gnm1.ann1.K60PJ1.1	43	T	actin-3 [Arachis ipaensis]		arahy.Tifrunner.gnm1.ann1.56X5WL.2	573	S	probable leucine-rich repeat receptor-like protein kinase At5g49770 isoform X1 [Arachis ipaensis]		arahy.Tifrunner.gnm1.ann1.8YJ5TP.1	E3 ubiquitin-protein ligase RLIM-like isoform X1 [Vigna radiata var. radiata]
arahy.Tifrunner.gnm1.ann1.C1QR5S.2	57	S	metal tolerance protein C2 isoform X2 [Arachis ipaensis]		arahy.Tifrunner.gnm1.ann1.AAAS1H.1	792	S	E3 ubiquitin-protein ligase HERC2-like [Arachis ipaensis]		arahy.Tifrunner.gnm1.ann1.56X5WL.2	924	S	probable leucine-rich repeat receptor-like protein kinase At5g49770 isoform X1 [Arachis ipaensis]		arahy.Tifrunner.gnm1.ann1.8Z631M.1	U-box domain-containing protein 34 isoform X1 [Arachis ipaensis]
arahy.Tifrunner.gnm1.ann1.F79NB3.1	143	S	AMP deaminase-like [Arachis ipaensis]		arahy.Tifrunner.gnm1.ann1.LSP3Z9.1	197	S	"plant/T5J17-70 protein, putative [Medicago truncatula]"		arahy.Tifrunner.gnm1.ann1.56Z8NU.1	31	S	"uridine kinase-like protein 2, chloroplastic [Arachis ipaensis]"		arahy.Tifrunner.gnm1.ann1.8ZRR6W.1	regulator of Vps4 activity in the MVB pathway protein [Medicago truncatula]
arahy.Tifrunner.gnm1.ann1.PUAG43.1	390	T	"calcium-transporting ATPase 4, endoplasmic reticulum-type-like [Arachis ipaensis]"		arahy.Tifrunner.gnm1.ann1.E7RSE6.1	1021	S	filaggrin [Arachis ipaensis]		arahy.Tifrunner.gnm1.ann1.56Z8NU.1	39	S	"uridine kinase-like protein 2, chloroplastic [Arachis ipaensis]"		arahy.Tifrunner.gnm1.ann1.901AMQ.1	DUF789 family protein [Medicago truncatula]
arahy.Tifrunner.gnm1.ann1.BEGE34.2	281	T	transmembrane protein [Arabidopsis thaliana]		arahy.Tifrunner.gnm1.ann1.7WKR24.1	621	S	eukaryotic translation initiation factor 4G-like isoform X1 [Arachis duranensis]		arahy.Tifrunner.gnm1.ann1.57FWYM.1	171	S	inactive leucine-rich repeat receptor-like serine/threonine-protein kinase At1g60630 [Arachis ipaensis]		arahy.Tifrunner.gnm1.ann1.9021A9.2
arahy.Tifrunner.gnm1.ann1.YJRC23.1	127	S	bromodomain-containing protein 4 [Arachis duranensis]		arahy.Tifrunner.gnm1.ann1.J18WU7.2	699	T	bromodomain testis-specific protein-like [Arachis duranensis]		arahy.Tifrunner.gnm1.ann1.57MKX2	40	S	"protein CHUP1, chloroplastic isoform X3 [Arachis duranensis]"		arahy.Tifrunner.gnm1.ann1.90BUA1	mitogen-activated protein kinase kinase kinase 1-like [Arachis ipaensis]
arahy.Tifrunner.gnm1.ann1.4L72G1.2	174	S	clathrin interactor EPSIN 1 [Arachis ipaensis]		arahy.Tifrunner.gnm1.ann1.23PF6N.2	372	S	"serine hydroxymethyltransferase, mitochondrial [Arachis duranensis]"		arahy.Tifrunner.gnm1.ann1.57MKX2	42	S	"protein CHUP1, chloroplastic isoform X3 [Arachis duranensis]"		arahy.Tifrunner.gnm1.ann1.90HUE1	protein CROWDED NUCLEI 4 [Arachis ipaensis]
arahy.Tifrunner.gnm1.ann1.R8LTT2.1	71	S	protein phosphatase 2C 29-like [Arachis duranensis]		arahy.Tifrunner.gnm1.ann1.JRK96Z.1	12	S	pleiotropic drug resistance protein 1-like [Arachis duranensis]		arahy.Tifrunner.gnm1.ann1.57MKX2	79	S	"protein CHUP1, chloroplastic isoform X3 [Arachis duranensis]"		arahy.Tifrunner.gnm1.ann1.914HVM.1	BSD domain-containing family protein [Populus trichocarpa]
arahy.Tifrunner.gnm1.ann1.I66G12.2	391	S	calcium-dependent protein kinase 28-like [Arachis ipaensis]		arahy.Tifrunner.gnm1.ann1.2Z77FC.1	106	S	HMG-Y-related protein A-like [Arachis ipaensis]		arahy.Tifrunner.gnm1.ann1.581AX3	468	S	serine/threonine-protein phosphatase 6 regulatory subunit 3 isoform X2 [Arachis duranensis]		arahy.Tifrunner.gnm1.ann1.9178Z2	vacuolar amino acid transporter 1 isoform X1 [Arachis duranensis]
arahy.Tifrunner.gnm1.ann1.G00RBV.1	142	S	la-related protein 1B-like [Arachis duranensis]		arahy.Tifrunner.gnm1.ann1.3J71J7.1	61	S	protein SAD1/UNC-84 domain protein 1-like [Arachis ipaensis]		arahy.Tifrunner.gnm1.ann1.58XCK1	402	S	probable LRR receptor-like serine/threonine-protein kinase At1g14390 [Arachis duranensis]		arahy.Tifrunner.gnm1.ann1.918JYJ.1	protein QUIRKY [Arachis ipaensis]
arahy.Tifrunner.gnm1.ann1.230XUM.2	423	S	heterogeneous nuclear ribonucleoprotein 1-like [Arachis ipaensis]		arahy.Tifrunner.gnm1.ann1.X3YRCT.2	21	S	eukaryotic translation initiation factor 4G-like isoform X1 [Arachis duranensis]		arahy.Tifrunner.gnm1.ann1.59KA91.1	379	S	"ribulose bisphosphate carboxylase/oxygenase activase, chloroplastic [Arachis duranensis]"		arahy.Tifrunner.gnm1.ann1.92FQ09.1	IRK-interacting protein [Arachis ipaensis]
arahy.Tifrunner.gnm1.ann1.J65KEH.1	197	S	serine/arginine-rich SC35-like splicing factor SCL30 [Arachis ipaensis]		arahy.Tifrunner.gnm1.ann1.UE8RN5.1	60	S	protein phosphatase inhibitor 2-like [Arachis ipaensis]		arahy.Tifrunner.gnm1.ann1.59WFQY.1	56	S	"DNA-damage-repair/toleration protein DRT111, chloroplastic [Arachis duranensis]"		arahy.Tifrunner.gnm1.ann1.92G265.1	vitellogenin-like [Nelumbo nucifera]
arahy.Tifrunner.gnm1.ann1.207GSN.2	172	S	ABSCISIC ACID-INSENSITIVE 5-like protein 2 isoform X3 [Arachis duranensis]		arahy.Tifrunner.gnm1.ann1.R6GQUS.2	496	S	GBF-interacting protein 1-like isoform X2 [Cajanus cajan]		arahy.Tifrunner.gnm1.ann1.5A22SW.1	101	S	NPL4-like protein 2 [Arachis ipaensis]		arahy.Tifrunner.gnm1.ann1.92J8KS.1	lysine-specific demethylase JMJ25-like [Arachis ipaensis]
arahy.Tifrunner.gnm1.ann1.39P5NE.1	137	S	187-kDa microtubule-associated protein AIR9 [Arachis duranensis]		arahy.Tifrunner.gnm1.ann1.BVJT87.2	280	S	adaptin ear-binding coat-associated protein 2-like [Glycine max]		arahy.Tifrunner.gnm1.ann1.5A22SW.1	105	S	NPL4-like protein 2 [Arachis ipaensis]		arahy.Tifrunner.gnm1.ann1.939UGX.1	polygalacturonase-like [Arachis ipaensis]
arahy.Tifrunner.gnm1.ann1.X5HSKX.1	24	S	cellulose synthase A catalytic subunit 1 [UDP-forming] [Arachis ipaensis]		arahy.Tifrunner.gnm1.ann1.DHG9YX.1	202	S	protein TIME FOR COFFEE-like [Arachis ipaensis]		arahy.Tifrunner.gnm1.ann1.5A5JT2	363	S	peptidyl-prolyl cis-trans isomerase CYP95 isoform X2 [Arachis ipaensis]		arahy.Tifrunner.gnm1.ann1.93GJX5.3	cyclin-dependent kinase G-2 [Arachis duranensis]
arahy.Tifrunner.gnm1.ann1.GCEP91.2	513	T	gibberellin-regulated family protein [Medicago truncatula]		arahy.Tifrunner.gnm1.ann1.AX840Y.1	56	S	enolase 2-like [Arachis ipaensis]		arahy.Tifrunner.gnm1.ann1.5A5JT2	505	S	peptidyl-prolyl cis-trans isomerase CYP95 isoform X2 [Arachis ipaensis]		arahy.Tifrunner.gnm1.ann1.94900P.1	protein MEI2-like 5 [Arachis ipaensis]
arahy.Tifrunner.gnm1.ann1.YIG4PR.1	6	S	calmodulin-binding receptor-like cytoplasmic kinase 2 [Arachis ipaensis]		arahy.Tifrunner.gnm1.ann1.7FUZ0V.2	476	S	probable serine/threonine-protein kinase WNK3 isoform X2 [Arachis duranensis]		arahy.Tifrunner.gnm1.ann1.5A5JT2	507	S	peptidyl-prolyl cis-trans isomerase CYP95 isoform X2 [Arachis ipaensis]		arahy.Tifrunner.gnm1.ann1.949BMZ.1	zinc ion-binding protein [Medicago truncatula]
arahy.Tifrunner.gnm1.ann1.SV5HQC.1	247	S	serine/threonine-protein kinase At5g01020 [Arachis ipaensis]		arahy.Tifrunner.gnm1.ann1.YCI793.1	96	T	death-inducer obliterator 1 [Cajanus cajan]		arahy.Tifrunner.gnm1.ann1.5A5JT2	584	S	peptidyl-prolyl cis-trans isomerase CYP95 isoform X2 [Arachis ipaensis]		arahy.Tifrunner.gnm1.ann1.94S7W0.2	"probable L-ascorbate peroxidase 6, chloroplastic isoform X1 [Arachis duranensis]"
arahy.Tifrunner.gnm1.ann1.70JD05.1	146	T	HMG-Y-related protein A-like [Arachis duranensis]		arahy.Tifrunner.gnm1.ann1.25IG2V.1	285	T	rho GTPase-activating protein gacF-like [Arachis duranensis]		arahy.Tifrunner.gnm1.ann1.5A67K1	1225	S	protein TSS-like [Arachis duranensis]		arahy.Tifrunner.gnm1.ann1.94S7W0.3	"probable L-ascorbate peroxidase 6, chloroplastic isoform X2 [Arachis duranensis]"
arahy.Tifrunner.gnm1.ann1.0XH4EA.1	541	Y	putative disease resistance protein At3g14460 isoform X1 [Arachis duranensis]		arahy.Tifrunner.gnm1.ann1.P7ITSZ.1	22	S	costars family protein-like [Arachis ipaensis]		arahy.Tifrunner.gnm1.ann1.5B6TP6.1	54	S	electron carrier/protein disulfide oxidoreductase [Medicago truncatula]		arahy.Tifrunner.gnm1.ann1.94UTW1	protein FRIGIDA [Arachis duranensis]
arahy.Tifrunner.gnm1.ann1.4FD105.2	413	T	protein KAKU4-like isoform X5 [Glycine max]		arahy.Tifrunner.gnm1.ann1.23ZYRY.3	84	S	"calcium-transporting ATPase 9, plasma membrane-type-like [Arachis duranensis]"		arahy.Tifrunner.gnm1.ann1.5BR908.2	347	S	target of Myb protein 1-like [Arachis ipaensis]		arahy.Tifrunner.gnm1.ann1.951CXV.1	protein indeterminate-domain 7-like [Arachis duranensis]
arahy.Tifrunner.gnm1.ann1.IGE775.1	33	S	kinesin light chain [Arachis ipaensis]		arahy.Tifrunner.gnm1.ann1.W7TQKX.2	1068	S	mediator of RNA polymerase II transcription subunit 13 [Arachis duranensis]		arahy.Tifrunner.gnm1.ann1.5BR908.2	393	S	target of Myb protein 1-like [Arachis ipaensis]		arahy.Tifrunner.gnm1.ann1.957CJ1	protein NRT1/ PTR FAMILY 2.6-like [Arachis ipaensis]
arahy.Tifrunner.gnm1.ann1.EMDZ87.1	64	S	plant/F24K9-26 protein [Medicago truncatula]		arahy.Tifrunner.gnm1.ann1.AZ4556.2	74	S	protein gar2 [Arachis ipaensis]		arahy.Tifrunner.gnm1.ann1.5BR908.2	400	S	target of Myb protein 1-like [Arachis ipaensis]		arahy.Tifrunner.gnm1.ann1.95ZVR1	nucleoside diphosphate kinase 1 [Cicer arietinum]
arahy.Tifrunner.gnm1.ann1.N6RYVU.1	569	T	chromatin assembly factor 1 subunit FAS2 [Arachis ipaensis]		arahy.Tifrunner.gnm1.ann1.C14L30.1	198	S	cellulose synthase A catalytic subunit 1 [UDP-forming]-like [Arachis ipaensis]		arahy.Tifrunner.gnm1.ann1.5BR908.2	403	S	target of Myb protein 1-like [Arachis ipaensis]		arahy.Tifrunner.gnm1.ann1.973ZBX.1	transcription factor GTE12 [Arachis ipaensis]
arahy.Tifrunner.gnm1.ann1.ADMQ1S.1	278	S	zinc finger RNA-binding protein-like isoform X2 [Arachis duranensis]		arahy.Tifrunner.gnm1.ann1.V4RJ43.1	277	T	ubiquitin-activating enzyme E1 2-like [Arachis ipaensis]		arahy.Tifrunner.gnm1.ann1.5C4441.1	209	S	DNA-directed RNA polymerase I subunit rpa43 [Arachis ipaensis]		arahy.Tifrunner.gnm1.ann1.97SJFR.1	phospholipid-transporting ATPase 2 [Arachis duranensis]
arahy.Tifrunner.gnm1.ann1.ZA5ISV.1	546	S	DEAD-box ATP-dependent RNA helicase 5 [Arachis ipaensis]		arahy.Tifrunner.gnm1.ann1.F8UVUT.1	35	S	THO complex subunit 4D-like [Arachis duranensis]		arahy.Tifrunner.gnm1.ann1.5C4SP4	305	S	tetratricopeptide repeat protein 4 homolog [Arachis ipaensis]		arahy.Tifrunner.gnm1.ann1.97VZCN.6	suppressor of mec-8 and unc-52 protein homolog 2-like [Arachis duranensis]
arahy.Tifrunner.gnm1.ann1.Z70S0B.2	769	S	DNA ligase 1-like isoform X1 [Arachis duranensis]		arahy.Tifrunner.gnm1.ann1.H567TY.1	894	S	plant/MOJ9-14 protein [Medicago truncatula]		arahy.Tifrunner.gnm1.ann1.5C5N68.2	9	S	DUF2146 family protein [Medicago truncatula]		arahy.Tifrunner.gnm1.ann1.980X4K.2	transcription factor TGA6 isoform X1 [Arachis duranensis]
arahy.Tifrunner.gnm1.ann1.EA9INV.1	315	S	protein WVD2-like 2 [Arachis ipaensis]		arahy.Tifrunner.gnm1.ann1.5CFI8R.1	631	S	WEB family protein At5g55860 [Arachis duranensis]		arahy.Tifrunner.gnm1.ann1.5C5N68.2	878	S	DUF2146 family protein [Medicago truncatula]		arahy.Tifrunner.gnm1.ann1.98ZYJR.1	E3 ubiquitin-protein ligase XBAT32 [Arachis duranensis]
arahy.Tifrunner.gnm1.ann1.9HQ4ZM.1	552	S	catalytic/pyridoxal phosphate-binding protein [Medicago truncatula]		arahy.Tifrunner.gnm1.ann1.VDB3CB.1	531	S	CW-type zinc-finger protein [Medicago truncatula]		arahy.Tifrunner.gnm1.ann1.5CFI8R.1	627	S	WEB family protein At5g55860 [Arachis duranensis]		arahy.Tifrunner.gnm1.ann1.993XX1	RmlC-like cupins superfamily protein [Medicago truncatula]
arahy.Tifrunner.gnm1.ann1.RVM1DJ.1	390	S	B3 domain-containing transcription factor VRN1 isoform X1 [Arachis duranensis]		arahy.Tifrunner.gnm1.ann1.4BR56W.1	157	S	AMP deaminase-like [Arachis ipaensis]		arahy.Tifrunner.gnm1.ann1.5CFI8R.1	631	S	WEB family protein At5g55860 [Arachis duranensis]		arahy.Tifrunner.gnm1.ann1.99PJJ1	probable transcription factor PosF21 [Arachis ipaensis]
arahy.Tifrunner.gnm1.ann1.M6YT3U.1	352	S	"sedoheptulose-1,7-bisphosphatase, chloroplastic [Arachis ipaensis]"		arahy.Tifrunner.gnm1.ann1.Z84XTW.1	495	T	synaptotagmin-5 [Arachis duranensis]		arahy.Tifrunner.gnm1.ann1.5CRU8P.2	433	S	NADP-dependent glyceraldehyde-3-phosphate dehydrogenase [Arachis ipaensis]		arahy.Tifrunner.gnm1.ann1.99W7VW.1	BTB/POZ domain-containing protein At1g30440-like [Arachis duranensis]
arahy.Tifrunner.gnm1.ann1.GBJ0AR.1	201	S	putative potassium transporter 12 [Arachis duranensis]		arahy.Tifrunner.gnm1.ann1.04JW1L.2	148	S	mitogen-activated protein kinase kinase kinase YODA-like isoform X3 [Arachis duranensis]		arahy.Tifrunner.gnm1.ann1.5DM86W.2	446	S	serine/threonine-protein kinase BLUS1-like [Arachis ipaensis]		arahy.Tifrunner.gnm1.ann1.9A7I0S.3	phosphatidate phosphatase PAH1-like [Arachis ipaensis]
arahy.Tifrunner.gnm1.ann1.WHG5AA.1	8	S	MYB transcription factor MYB73 [Glycine max]		arahy.Tifrunner.gnm1.ann1.4FD105.2	203	S	protein KAKU4-like isoform X5 [Glycine max]		arahy.Tifrunner.gnm1.ann1.5DM86W.2	504	S	serine/threonine-protein kinase BLUS1-like [Arachis ipaensis]		arahy.Tifrunner.gnm1.ann1.9ADW36.1	serine/arginine-rich splicing factor RS31-like isoform X1 [Arachis duranensis]
arahy.Tifrunner.gnm1.ann1.84FHQN.1	300	T	epidermal growth factor receptor substrate 15-like 1 isoform X1 [Arachis duranensis]		arahy.Tifrunner.gnm1.ann1.TP5BL7.1	61	S	"beta-amylase 1, chloroplastic [Arachis ipaensis]"		arahy.Tifrunner.gnm1.ann1.5DM86W.2	506	S	serine/threonine-protein kinase BLUS1-like [Arachis ipaensis]		arahy.Tifrunner.gnm1.ann1.9BBP62	"malate dehydrogenase, mitochondrial [Arachis ipaensis]"
arahy.Tifrunner.gnm1.ann1.KS7331.1	325	S	mitogen-activated protein kinase kinase kinase YODA-like [Arachis ipaensis]		arahy.Tifrunner.gnm1.ann1.SLVF1G.2	14	S	interactor of constitutive active ROPs 4-like [Arachis ipaensis]		arahy.Tifrunner.gnm1.ann1.5DM86W.2	535	S	serine/threonine-protein kinase BLUS1-like [Arachis ipaensis]		arahy.Tifrunner.gnm1.ann1.9BC44J.1	"myosin heavy chain, striated muscle [Cajanus cajan]"
arahy.Tifrunner.gnm1.ann1.PHJ2IJ.1	3551	S	vacuolar protein sorting protein [Medicago truncatula]		arahy.Tifrunner.gnm1.ann1.4E075G.1	726	S	sericin 1 isoform X1 [Arachis duranensis]		arahy.Tifrunner.gnm1.ann1.5DM86W.2	557	S	serine/threonine-protein kinase BLUS1-like [Arachis ipaensis]		arahy.Tifrunner.gnm1.ann1.9D7AF0.1	protein RESTRICTED TEV MOVEMENT 2-like [Arachis ipaensis]
arahy.Tifrunner.gnm1.ann1.26W00C.1	339	S	putative RNA-binding protein Luc7-like 2 [Arachis duranensis]		arahy.Tifrunner.gnm1.ann1.SMM8KX.1	288	S	PLAC8 family protein [Medicago truncatula]		arahy.Tifrunner.gnm1.ann1.5DM86W.2	560	S	serine/threonine-protein kinase BLUS1-like [Arachis ipaensis]		arahy.Tifrunner.gnm1.ann1.9G9LXM.2	peroxisomal fatty acid beta-oxidation multifunctional protein AIM1 [Arachis ipaensis]
arahy.Tifrunner.gnm1.ann1.D91UJQ.1	59	T	histone H3.3 isoform X1 [Daucus carota subsp. sativus]		arahy.Tifrunner.gnm1.ann1.HMW6IE.2	138	S	serine/arginine-rich SC35-like splicing factor SCL33 [Arachis duranensis]		arahy.Tifrunner.gnm1.ann1.5DM86W.2	567	S	serine/threonine-protein kinase BLUS1-like [Arachis ipaensis]		arahy.Tifrunner.gnm1.ann1.9GY8Y8.1	zinc finger CCCH domain-containing protein 43-like isoform X1 [Arachis ipaensis]
arahy.Tifrunner.gnm1.ann1.H8DYH4.1	187	S	BTB/POZ domain-containing protein At1g67900 [Arachis duranensis]		arahy.Tifrunner.gnm1.ann1.132VHE.2	89	S	"phosphatidylinositol 3,4,5-trisphosphate 3-phosphatase and protein-tyrosine-phosphatase PTEN2A-like[Arachis ipaensis]"		arahy.Tifrunner.gnm1.ann1.5E2DVT.1	71	S	blue-light photoreceptor PHR2 [Arachis ipaensis]		arahy.Tifrunner.gnm1.ann1.9HQ4ZM.1	catalytic/pyridoxal phosphate-binding protein [Medicago truncatula]
arahy.Tifrunner.gnm1.ann1.YJ1J9B.2	36	S	vacuolar amino acid transporter 1-like [Arachis ipaensis]		arahy.Tifrunner.gnm1.ann1.YGA72Z.1	164	S	BSD domain-containing protein 1-like [Arachis duranensis]		arahy.Tifrunner.gnm1.ann1.5E2SW1	8	S	MLP-like protein 43 [Arachis duranensis]		arahy.Tifrunner.gnm1.ann1.9HZ6ZU.2	serine/threonine-protein kinase HT1-like [Arachis duranensis]
arahy.Tifrunner.gnm1.ann1.LLLD9E.1	217	S	PH-response transcription factor [Arabidopsis thaliana]		arahy.Tifrunner.gnm1.ann1.11NDUV.1	14	S	LOW QUALITY PROTEIN: probable protein phosphatase 2C 33 [Arachis duranensis]		arahy.Tifrunner.gnm1.ann1.5EYH11	19	S	aquaporin PIP2-7-like [Arachis ipaensis]		arahy.Tifrunner.gnm1.ann1.9I98P1.2	NLI interacting factor-like phosphatase [Medicago truncatula]
arahy.Tifrunner.gnm1.ann1.4Z5MSS.1	925	S	villin-2 isoform X2 [Arachis ipaensis]		arahy.Tifrunner.gnm1.ann1.PFNK2V.2	950	S	eukaryotic translation initiation factor 3 subunit A [Arachis ipaensis]		arahy.Tifrunner.gnm1.ann1.5EYH11	259	S	aquaporin PIP2-7-like [Arachis ipaensis]		arahy.Tifrunner.gnm1.ann1.9JEX28.1	host cell factor isoform X1 [Arachis ipaensis]
arahy.Tifrunner.gnm1.ann1.PRSK66.1	177	S	"intracellular protein transporter USO1-like protein, putative [Medicago truncatula]"		arahy.Tifrunner.gnm1.ann1.KPU76V.1	16	S	DNA topoisomerase 1-like [Cicer arietinum]		arahy.Tifrunner.gnm1.ann1.5EYH11	262	S	aquaporin PIP2-7-like [Arachis ipaensis]		arahy.Tifrunner.gnm1.ann1.9K3401	"putative methylesterase 12, chloroplastic isoform X1 [Arachis duranensis]"
arahy.Tifrunner.gnm1.ann1.5FS3JW.2	71	S	serine/threonine-protein kinase HT1-like [Arachis ipaensis]		arahy.Tifrunner.gnm1.ann1.L384WR.1	177	S	RPM1-interacting protein 4-like [Arachis ipaensis]		arahy.Tifrunner.gnm1.ann1.5FGK1K.2	102	S	WD repeat-containing protein 44 [Arachis ipaensis]		arahy.Tifrunner.gnm1.ann1.9K9ZRS.2	protein UPSTREAM OF FLC-like [Arachis ipaensis]
arahy.Tifrunner.gnm1.ann1.H1W27A.1	100	T	transmembrane protein 209 [Lupinus angustifolius]		arahy.Tifrunner.gnm1.ann1.GSB289.1	84	S	uncharacterized membrane protein At1g16860-like [Arachis duranensis]		arahy.Tifrunner.gnm1.ann1.5FS3JW.2	67	S	serine/threonine-protein kinase HT1-like [Arachis ipaensis]		arahy.Tifrunner.gnm1.ann1.9KUV83.1	protein indeterminate-domain 12-like [Arachis ipaensis]
arahy.Tifrunner.gnm1.ann1.JS0ISV.1	38	S	O-fucosyltransferase family protein [Medicago truncatula]		arahy.Tifrunner.gnm1.ann1.W1T8WI.1	15	S	101 kDa malaria antigen [Phoenix dactylifera]		arahy.Tifrunner.gnm1.ann1.5FS3JW.2	70	S	serine/threonine-protein kinase HT1-like [Arachis ipaensis]		arahy.Tifrunner.gnm1.ann1.9MI9PY.1	trypsin family protein [Medicago truncatula]
arahy.Tifrunner.gnm1.ann1.4L72G1.2	242	S	clathrin interactor EPSIN 1 [Arachis ipaensis]		arahy.Tifrunner.gnm1.ann1.XPR4K7.1	822	S	ABC transporter G family member 36-like [Arachis ipaensis]		arahy.Tifrunner.gnm1.ann1.5FS3JW.2	71	S	serine/threonine-protein kinase HT1-like [Arachis ipaensis]		arahy.Tifrunner.gnm1.ann1.9QIA11	probable inactive leucine-rich repeat receptor-like protein kinase At3g03770 isoform X1 [Arachis ipaensis]
arahy.Tifrunner.gnm1.ann1.HVM0CV.1	660	S	AP-4 complex subunit epsilon [Arachis duranensis]		arahy.Tifrunner.gnm1.ann1.H0C62V.4	631	S	zinc finger CCCH domain-containing protein 18-like [Arachis duranensis]		arahy.Tifrunner.gnm1.ann1.5GPW51	355	S	"transketolase, chloroplastic [Arachis duranensis]"		arahy.Tifrunner.gnm1.ann1.9QU84Y.10	serine/threonine-protein kinase Nek6-like [Arachis duranensis]
arahy.Tifrunner.gnm1.ann1.AX9XXP.1	16	S	"zinc ion-binding protein, putative [Medicago truncatula]"		arahy.Tifrunner.gnm1.ann1.NQHE67.1	32	S	probable WRKY transcription factor 61 [Arachis ipaensis]		arahy.Tifrunner.gnm1.ann1.5GPW51	441	S	"transketolase, chloroplastic [Arachis duranensis]"		arahy.Tifrunner.gnm1.ann1.9R49YU.1	peroxisomal small heat shock protein [Medicago truncatula]
arahy.Tifrunner.gnm1.ann1.IY6P5S.1	333	T	probable serine/threonine-protein kinase At1g01540 [Arachis duranensis]		arahy.Tifrunner.gnm1.ann1.WG9HC3.1	49	S	protein DETOXIFICATION 40-like [Arachis ipaensis]		arahy.Tifrunner.gnm1.ann1.5GPW51	456	S	"transketolase, chloroplastic [Arachis duranensis]"		arahy.Tifrunner.gnm1.ann1.9R72FZ.1	serine/arginine-rich splicing factor RSZ21A [Elaeis guineensis]
arahy.Tifrunner.gnm1.ann1.2MP0U5.3	489	S	mitogen-activated protein kinase 9-like [Arachis duranensis]		arahy.Tifrunner.gnm1.ann1.H8Y7P7.2	543	S	serine/arginine-rich splicing factor 4-like [Arachis duranensis]		arahy.Tifrunner.gnm1.ann1.5GV92J.2	100	S	protein PHR1-LIKE 1-like isoform X2 [Arachis ipaensis]		arahy.Tifrunner.gnm1.ann1.9RF0MR.1	soyasaponin III rhamnosyltransferase-like [Arachis ipaensis]
arahy.Tifrunner.gnm1.ann1.FBBL0Z.1	225	S	protein MODIFIER OF SNC1 1 isoform X1 [Arachis duranensis]		arahy.Tifrunner.gnm1.ann1.QHM6UX.1	158	T	peroxisomal (S)-2-hydroxy-acid oxidase GLO1 isoform X1 [Arachis duranensis]		arahy.Tifrunner.gnm1.ann1.5H0MDK.1	100	S	nicotinate phosphoribosyltransferase-like [Arachis duranensis]		arahy.Tifrunner.gnm1.ann1.9SH8TS.1	transcription initiation factor TFIID subunit 1 isoform X1 [Arachis ipaensis]
arahy.Tifrunner.gnm1.ann1.C4VIYD.2	582	S	"P-loop nucleoside triphosphate hydrolase superfamily protein, putative [Medicago truncatula]"		arahy.Tifrunner.gnm1.ann1.4DJY3R.1	96	S	"keratin, type I cytoskeletal 10-like [Arachis duranensis]"		arahy.Tifrunner.gnm1.ann1.5HY1FK.1	215	S	rhomboid-like protein 20 isoform X2 [Arachis ipaensis]		arahy.Tifrunner.gnm1.ann1.9SSZ5T.1	RNA polymerase II C-terminal domain phosphatase-like 1 isoform X1 [Arachis ipaensis]
arahy.Tifrunner.gnm1.ann1.FH44NZ.1	506	S	ABC transporter B family member 11-like [Arachis duranensis]		arahy.Tifrunner.gnm1.ann1.H6IXD1.1	6	S	protein transport protein Sec61 subunit beta [Arachis ipaensis]		arahy.Tifrunner.gnm1.ann1.5JP303.2	50	S	DEAD-box ATP-dependent RNA helicase 37-like [Arachis ipaensis]		arahy.Tifrunner.gnm1.ann1.9T1CY3.1	ubiquitin carboxyl-terminal hydrolase 34-like [Glycine max]
arahy.Tifrunner.gnm1.ann1.VNV0G0.2	1028	S	E3 ubiquitin-protein ligase UPL3 isoform X1 [Arachis ipaensis]		arahy.Tifrunner.gnm1.ann1.0QF2GW.1	462	S	AUGMIN subunit 6 [Arachis ipaensis]		arahy.Tifrunner.gnm1.ann1.5KAB81	355	S	"receptor homology region, transmembrane domain- and RING domain-containing protein 2 [Arachis ipaensis]"		arahy.Tifrunner.gnm1.ann1.9UH1T1	protein tipD [Arachis ipaensis]
arahy.Tifrunner.gnm1.ann1.ZA5ISV.1	26	S	DEAD-box ATP-dependent RNA helicase 5 [Arachis ipaensis]		arahy.Tifrunner.gnm1.ann1.P1I5J2.1	86	S	nephrocystin-3 [Arachis ipaensis]		arahy.Tifrunner.gnm1.ann1.5KAB81	374	S	"receptor homology region, transmembrane domain- and RING domain-containing protein 2 [Arachis ipaensis]"		arahy.Tifrunner.gnm1.ann1.9UJZ67.1	sorting nexin carboxy-terminal protein [Medicago truncatula]
arahy.Tifrunner.gnm1.ann1.PC8EL3.1	19	S	serine/threonine-protein kinase At5g01020 [Arachis ipaensis]		arahy.Tifrunner.gnm1.ann1.IKZ5YQ.1	95	S	chitin elicitor receptor kinase 1-like [Arachis ipaensis]		arahy.Tifrunner.gnm1.ann1.5KAB81	376	S	"receptor homology region, transmembrane domain- and RING domain-containing protein 2 [Arachis ipaensis]"		arahy.Tifrunner.gnm1.ann1.9V0IY1	P-loop nucleoside triphosphate hydrolase superfamily protein [Medicago truncatula]
arahy.Tifrunner.gnm1.ann1.F381U8.1	173	T	protein PAT1 homolog 1 [Vigna radiata var. radiata]		arahy.Tifrunner.gnm1.ann1.V2HZSR.1	172	T	eukaryotic translation initiation factor 5B [Arachis duranensis]		arahy.Tifrunner.gnm1.ann1.5KWE5R.1	3	S	"putative quinone-oxidoreductase homolog, chloroplastic [Arachis ipaensis]"		arahy.Tifrunner.gnm1.ann1.9V79C6.2	myosin-2-like isoform X2 [Arachis ipaensis]
arahy.Tifrunner.gnm1.ann1.E32WFZ.2	13	S	protein argonaute 1 [Arachis ipaensis]		arahy.Tifrunner.gnm1.ann1.Y4TJ2Z.1	362	S	serine/threonine-protein kinase EDR1 [Arachis ipaensis]		arahy.Tifrunner.gnm1.ann1.5NE8A1	1590	S	LOW QUALITY PROTEIN: CCR4-NOT transcription complex subunit 1 [Arachis duranensis]		arahy.Tifrunner.gnm1.ann1.9VF770.1	potassium transporter 5-like [Arachis duranensis]
arahy.Tifrunner.gnm1.ann1.JKR5UJ.1	427	S	nuclear pore complex protein NUP1 [Arachis ipaensis]		arahy.Tifrunner.gnm1.ann1.T3H8L6.1	20	S	adenosylhomocysteinase-like [Arachis ipaensis]		arahy.Tifrunner.gnm1.ann1.5NE8A1	1666	S	LOW QUALITY PROTEIN: CCR4-NOT transcription complex subunit 1 [Arachis duranensis]		arahy.Tifrunner.gnm1.ann1.9W5UDX.2	RNA polymerase II transcriptional coactivator KIWI-like [Arachis ipaensis]
arahy.Tifrunner.gnm1.ann1.5H0MDK.1	103	S	nicotinate phosphoribosyltransferase-like [Arachis duranensis]		arahy.Tifrunner.gnm1.ann1.P96X61.3	77	S	"fructose-bisphosphate aldolase 1, chloroplastic-like [Arachis duranensis]"		arahy.Tifrunner.gnm1.ann1.5NH7J1	46	S	vitellogenin-2-like isoform X2 [Ananas comosus]		arahy.Tifrunner.gnm1.ann1.9WC044.1	putative clathrin assembly protein At4g40080 [Arachis ipaensis]
arahy.Tifrunner.gnm1.ann1.ZL6KGB.1	25	S	GDP-fucose O-fucosyltransferase-like protein [Medicago truncatula]		arahy.Tifrunner.gnm1.ann1.9VF770.1	42	S	potassium transporter 5-like [Arachis duranensis]		arahy.Tifrunner.gnm1.ann1.5NTT5I.1	71	S	pyruvate decarboxylase 2-like [Arachis duranensis]		arahy.Tifrunner.gnm1.ann1.9WU370.1	plant intracellular Ras-group-related LRR protein 9-like [Arachis duranensis]
arahy.Tifrunner.gnm1.ann1.SNA779.5	69	S	glycine-rich RNA-binding protein RZ1B isoform X1 [Arachis ipaensis]		arahy.Tifrunner.gnm1.ann1.WUL5PS.3	143	S	coiled-coil domain-containing protein SCD2 [Arachis ipaensis]		arahy.Tifrunner.gnm1.ann1.5P4QK1	46	S	"protein SUPPRESSOR OF GENE SILENCING 3 homolog, partial [Arachis duranensis]"		arahy.Tifrunner.gnm1.ann1.9WX8G8.3	octicosapeptide/phox/Bem1p domain kinase superfamily protein [Medicago truncatula]
arahy.Tifrunner.gnm1.ann1.H4I0EH.2	386	S	TOM1-like protein 2 [Arachis ipaensis]		arahy.Tifrunner.gnm1.ann1.9RBM2G.1	339	S	RING-H2 finger protein ATL46 [Arachis duranensis]		arahy.Tifrunner.gnm1.ann1.5P4QK1	63	S	"protein SUPPRESSOR OF GENE SILENCING 3 homolog, partial [Arachis duranensis]"		arahy.Tifrunner.gnm1.ann1.A02MA9.1	probable ADP-ribosylation factor GTPase-activating protein AGD13 [Arachis duranensis]
arahy.Tifrunner.gnm1.ann1.R18LRK.1	4	S	"L-ascorbate peroxidase, cytosolic [Arachis ipaensis]"		arahy.Tifrunner.gnm1.ann1.7F0WTK.1	1038	S	COP1-interacting-like protein [Medicago truncatula]		arahy.Tifrunner.gnm1.ann1.5P4QK1	145	S	"protein SUPPRESSOR OF GENE SILENCING 3 homolog, partial [Arachis duranensis]"		arahy.Tifrunner.gnm1.ann1.A08QY1	E3 ubiquitin-protein ligase ATL31-like [Arachis ipaensis]
arahy.Tifrunner.gnm1.ann1.W4PCDV.2	246	T	cell division control protein 48-like isoform X1 [Arachis ipaensis]		arahy.Tifrunner.gnm1.ann1.GBN5SF.2	896	S	serine/arginine repetitive matrix protein 2-like isoform X2 [Arachis ipaensis]		arahy.Tifrunner.gnm1.ann1.5PGU74.2	261	S	"glyceraldehyde-3-phosphate dehydrogenase GAPCP2, chloroplastic [Arachis duranensis]"		arahy.Tifrunner.gnm1.ann1.A0BSJM.1	protein DEK-like [Arachis ipaensis]
arahy.Tifrunner.gnm1.ann1.8YJ5TP.1	79	S	E3 ubiquitin-protein ligase RLIM-like isoform X1 [Vigna radiata var. radiata]		arahy.Tifrunner.gnm1.ann1.65X03I.2	85	S			arahy.Tifrunner.gnm1.ann1.5Q7AH1	73	S	translation machinery-associated protein 22 [Arachis duranensis]		arahy.Tifrunner.gnm1.ann1.A0F858.1	splicing factor U2af small subunit B-like [Arachis ipaensis]
arahy.Tifrunner.gnm1.ann1.UP2C0E.1	251	S	clathrin interactor EPSIN 3 isoform X1 [Arachis ipaensis]		arahy.Tifrunner.gnm1.ann1.T383Y7.3	187	S	formin-like protein 6 [Arachis ipaensis]		arahy.Tifrunner.gnm1.ann1.5QP756.2	171	S	BTB/POZ domain-containing protein At1g63850 [Arachis ipaensis]		arahy.Tifrunner.gnm1.ann1.A0G0F1.2	phospholipase A-2-activating protein [Arachis ipaensis]
arahy.Tifrunner.gnm1.ann1.WUI646.2	52	S	protein TIFY 8 isoform X3 [Arachis ipaensis]		arahy.Tifrunner.gnm1.ann1.4I8WV5.1	123	S	ninja-family protein mc410 isoform X1 [Arachis duranensis]		arahy.Tifrunner.gnm1.ann1.5RAP3T.1	1071	S	pre-mRNA-processing factor 17 [Arachis ipaensis]		arahy.Tifrunner.gnm1.ann1.A0TJ2P.1	protein EDS1-like [Arachis duranensis]
arahy.Tifrunner.gnm1.ann1.H9TV53.1	174	S	epsin-3-like [Arachis duranensis]		arahy.Tifrunner.gnm1.ann1.6AJ8U6.1	300	S	protein SCAR2-like [Arachis ipaensis]		arahy.Tifrunner.gnm1.ann1.5RAP3T.1	1073	S	pre-mRNA-processing factor 17 [Arachis ipaensis]		arahy.Tifrunner.gnm1.ann1.A0WBES.1	remorin 4.1 [Cajanus cajan]
arahy.Tifrunner.gnm1.ann1.KMF75D.1	684	S	boron transporter 1-like [Arachis duranensis]		arahy.Tifrunner.gnm1.ann1.5FGK1K.2	102	S	WD repeat-containing protein 44 [Arachis ipaensis]		arahy.Tifrunner.gnm1.ann1.5RAP3T.1	1118	S	pre-mRNA-processing factor 17 [Arachis ipaensis]		arahy.Tifrunner.gnm1.ann1.A1B6R1	sugar transporter ERD6-like 6 [Arachis ipaensis]
arahy.Tifrunner.gnm1.ann1.V7V4BZ.1	105	S	protein EMSY-LIKE 1 [Arachis ipaensis]		arahy.Tifrunner.gnm1.ann1.8H8JUA.1	555	S	serine/arginine-rich splicing factor RS40 isoform X1 [Arachis duranensis]		arahy.Tifrunner.gnm1.ann1.5RAP3T.1	1120	S	pre-mRNA-processing factor 17 [Arachis ipaensis]		arahy.Tifrunner.gnm1.ann1.A1G5N1.1	reticulon-like protein B1 [Arachis ipaensis]
arahy.Tifrunner.gnm1.ann1.38CFQ6.2	764	S	villin-1 [Arachis duranensis]		arahy.Tifrunner.gnm1.ann1.5041YP.1	351	S	probable WRKY transcription factor 32 isoform X2 [Arachis duranensis]		arahy.Tifrunner.gnm1.ann1.5RAP3T.1	1126	S	pre-mRNA-processing factor 17 [Arachis ipaensis]		arahy.Tifrunner.gnm1.ann1.A1ITM9.1	"3-hydroxyisobutyryl-CoA hydrolase-like protein 3, mitochondrial isoform X1 [Arachis duranensis]"
arahy.Tifrunner.gnm1.ann1.N0BIWD.1	307	S	vacuolar protein sorting-associated protein 27-like isoform X1 [Arachis ipaensis]		arahy.Tifrunner.gnm1.ann1.5JP303.2	50	S	DEAD-box ATP-dependent RNA helicase 37-like [Arachis ipaensis]		arahy.Tifrunner.gnm1.ann1.5RAP3T.1	1129	S	pre-mRNA-processing factor 17 [Arachis ipaensis]		arahy.Tifrunner.gnm1.ann1.A1PM7K.2	exosome complex component CSL4 [Arachis duranensis]
arahy.Tifrunner.gnm1.ann1.FT1LK2.1	176	S	epsin-3-like [Arachis ipaensis]		arahy.Tifrunner.gnm1.ann1.JA3EPN.1	398	S	WD repeat-containing protein 48 isoform X2 [Arachis duranensis]		arahy.Tifrunner.gnm1.ann1.5RAP3T.1	1195	S	pre-mRNA-processing factor 17 [Arachis ipaensis]		arahy.Tifrunner.gnm1.ann1.A1PMZW.1	bromodomain and WD repeat-containing protein 1-like [Arachis duranensis]
arahy.Tifrunner.gnm1.ann1.PFNK2V.2	952	S	eukaryotic translation initiation factor 3 subunit A [Arachis ipaensis]		arahy.Tifrunner.gnm1.ann1.JN5ZJX.1	49	T	cell wall protein RBR3-like [Glycine max]		arahy.Tifrunner.gnm1.ann1.5RM0K9.1	82	S	BSD domain protein [Medicago truncatula]		arahy.Tifrunner.gnm1.ann1.A1RQ10.3	heterogeneous nuclear ribonucleoprotein 1-like [Arachis ipaensis]
arahy.Tifrunner.gnm1.ann1.CG0SMC.3	91	S	protein PNS1-like [Arachis ipaensis]		arahy.Tifrunner.gnm1.ann1.H1QDLV.2	62	S	pantothenate kinase 2-like [Arachis ipaensis]		arahy.Tifrunner.gnm1.ann1.5RM0K9.1	314	S	BSD domain protein [Medicago truncatula]		arahy.Tifrunner.gnm1.ann1.A1UAR7.1	outer envelope protein 61 [Arachis ipaensis]
arahy.Tifrunner.gnm1.ann1.9QU84Y.10	260	S	serine/threonine-protein kinase Nek6-like [Arachis duranensis]		arahy.Tifrunner.gnm1.ann1.1SB772.3	58	S	sterol 3-beta-glucosyltransferase UGT80B1 [Arachis ipaensis]		arahy.Tifrunner.gnm1.ann1.5SR8F4	1026	S	E3 ubiquitin-protein ligase UPL3 isoform X3 [Arachis duranensis]		arahy.Tifrunner.gnm1.ann1.A29QFV.1	mucin-17 [Theobroma cacao]
arahy.Tifrunner.gnm1.ann1.Z7V5PV.1	14	S	catalytic/ coenzyme binding protein [Arabidopsis lyrata subsp. lyrata]		arahy.Tifrunner.gnm1.ann1.Z2FZT8.2	294	S	protein SMG7L [Arachis duranensis]		arahy.Tifrunner.gnm1.ann1.5U1FHR.1	32	S	"ATP-dependent Clp protease adapter protein CLPS1, chloroplastic-like [Arachis duranensis]"		arahy.Tifrunner.gnm1.ann1.A2IS88.1	protein EDS1-like [Arachis ipaensis]
arahy.Tifrunner.gnm1.ann1.1T1RVQ.1	224	S	putative HVA22-like protein g isoform X2 [Arachis duranensis]		arahy.Tifrunner.gnm1.ann1.T9ZPF9.1	56	T	DUF1685 family protein [Medicago truncatula]		arahy.Tifrunner.gnm1.ann1.5V04Y1	133	S	60S acidic ribosomal protein P1 [Arachis ipaensis]		arahy.Tifrunner.gnm1.ann1.A2Z0U2	phototropin-2 [Arachis ipaensis]
arahy.Tifrunner.gnm1.ann1.DYF5WN.1	573	S	protein ENHANCED DOWNY MILDEW 2-like [Arachis ipaensis]		arahy.Tifrunner.gnm1.ann1.U9U8W4.1	238	T	vitellogenin-like [Nelumbo nucifera]		arahy.Tifrunner.gnm1.ann1.5V3X3X.2	214	S	LOW QUALITY PROTEIN: topless-related protein 4-like [Arachis ipaensis]		arahy.Tifrunner.gnm1.ann1.A33MJY.2	ankyrin repeat domain-containing protein 13C [Arachis duranensis]
arahy.Tifrunner.gnm1.ann1.I99STC.1	129	S	transcription factor MafB-like [Prunus mume]		arahy.Tifrunner.gnm1.ann1.45SMBX.1	31	T	kinesin light chain [Arachis ipaensis]		arahy.Tifrunner.gnm1.ann1.5V3X3X.2	734	S	LOW QUALITY PROTEIN: topless-related protein 4-like [Arachis ipaensis]		arahy.Tifrunner.gnm1.ann1.A3XBS1	electron carrier/protein disulfide oxidoreductase [Medicago truncatula]
arahy.Tifrunner.gnm1.ann1.CPIQ3I.1	464	S	actin cytoskeleton-regulatory complex protein PAN1 [Arachis duranensis]		arahy.Tifrunner.gnm1.ann1.YDF97G.2	173	S	zinc finger protein [Medicago truncatula]		arahy.Tifrunner.gnm1.ann1.5V604V.1	151	S	protein starmaker-like [Cajanus cajan]		arahy.Tifrunner.gnm1.ann1.A42YA2.1	"RING/FYVE/PHD zinc finger protein, putative [Medicago truncatula]"
arahy.Tifrunner.gnm1.ann1.SD5LLS.1	16	S	serine/threonine-protein kinase STY8 [Arachis ipaensis]		arahy.Tifrunner.gnm1.ann1.JY1AQN.1	135	S	protein TSS-like isoform X1 [Arachis duranensis]		arahy.Tifrunner.gnm1.ann1.5W2WC3.1	106	S	kinesin-13A-like [Arachis ipaensis]		arahy.Tifrunner.gnm1.ann1.A52I01	"transketolase, chloroplastic-like [Arachis ipaensis]"
arahy.Tifrunner.gnm1.ann1.KA488U.2	548	S	peptidyl-prolyl cis-trans isomerase CYP59 [Arachis duranensis]		arahy.Tifrunner.gnm1.ann1.WSMZ37.1	61	S	"transmembrane protein, putative [Medicago truncatula]"		arahy.Tifrunner.gnm1.ann1.5Z7E3S.2	253	S	proline-rich receptor-like protein kinase PERK9 [Arachis ipaensis]		arahy.Tifrunner.gnm1.ann1.A6EHAN.1	transcription factor RF2b-like [Arachis ipaensis]
arahy.Tifrunner.gnm1.ann1.NQ3RL0.1	217	S	serine/arginine-rich splicing factor RS31-like [Arachis duranensis]		arahy.Tifrunner.gnm1.ann1.LP1JBF.1	182	S	glycine-rich protein 2 [Arachis ipaensis]		arahy.Tifrunner.gnm1.ann1.5ZE3N1.1	44	S	vitellogenin-A2 isoform X2 [Arachis ipaensis]		arahy.Tifrunner.gnm1.ann1.A6FH4P.2	actin cytoskeleton-regulatory complex protein pan1 [Theobroma cacao]
arahy.Tifrunner.gnm1.ann1.KS7331.1	100	S	mitogen-activated protein kinase kinase kinase YODA-like [Arachis ipaensis]		arahy.Tifrunner.gnm1.ann1.D3EF7U.2	449	S	serine/threonine protein phosphatase 2A 55 kDa regulatory subunit B beta isoform-like isoform X2 [Arachis duranensis]		arahy.Tifrunner.gnm1.ann1.5ZZ6F4.2	205	S	E3 ubiquitin-protein ligase Hakai [Arachis duranensis]		arahy.Tifrunner.gnm1.ann1.A6N0M1	soluble inorganic pyrophosphatase 4 [Arachis duranensis]
arahy.Tifrunner.gnm1.ann1.W9U8CY.1	378	S	"glycine dehydrogenase (decarboxylating), mitochondrial [Arachis ipaensis]"		arahy.Tifrunner.gnm1.ann1.QAL1ZF.1	205	S	probable protein phosphatase 2C 39 [Arachis duranensis]		arahy.Tifrunner.gnm1.ann1.612ZK0.1	20	S	DExH-box ATP-dependent RNA helicase DExH10 [Arachis ipaensis]		arahy.Tifrunner.gnm1.ann1.A6QGA7.1	tobamovirus multiplication protein 2A-like [Arachis ipaensis]
arahy.Tifrunner.gnm1.ann1.VZ1HH7.2	660	T	ABC transporter B family member 6-like [Arachis ipaensis]		arahy.Tifrunner.gnm1.ann1.IB7YTW.2	8	S	acyl-CoA-binding domain-containing protein 4 isoform X1 [Arachis ipaensis]		arahy.Tifrunner.gnm1.ann1.612ZK0.1	41	S	DExH-box ATP-dependent RNA helicase DExH10 [Arachis ipaensis]		arahy.Tifrunner.gnm1.ann1.A6X2C1	serine/threonine-protein kinase AFC3 [Arachis ipaensis]
arahy.Tifrunner.gnm1.ann1.SDH4Q1.2	743	S	C2 domain-containing protein At1g53590-like [Arachis ipaensis]		arahy.Tifrunner.gnm1.ann1.IW12TT.1	250	S	E3 ubiquitin-protein ligase MARCH7-like [Lupinus angustifolius]		arahy.Tifrunner.gnm1.ann1.625701	803	S	"salt-inducible protein, putative [Medicago truncatula]"		arahy.Tifrunner.gnm1.ann1.A6XFHQ.1	E3 ubiquitin-protein ligase RING1-like [Arachis duranensis]
arahy.Tifrunner.gnm1.ann1.I20RPW.3	558	S	transcription factor GTE8-like [Arachis ipaensis]		arahy.Tifrunner.gnm1.ann1.YJRC23.1	130	S	bromodomain-containing protein 4 [Arachis duranensis]		arahy.Tifrunner.gnm1.ann1.62AJ61	684	S	protein NLP6-like isoform X1 [Arachis ipaensis]		arahy.Tifrunner.gnm1.ann1.A7Q2QI.2	proteinaceous RNase P 2 [Arachis ipaensis]
arahy.Tifrunner.gnm1.ann1.ZLM6U3.1	18	S	NADP-dependent malic enzyme [Arachis duranensis]		arahy.Tifrunner.gnm1.ann1.T00U8Q.3	461	S	guanylate-binding protein 1 [Arachis ipaensis]		arahy.Tifrunner.gnm1.ann1.62AJ61	834	S	protein NLP6-like isoform X1 [Arachis ipaensis]		arahy.Tifrunner.gnm1.ann1.A7SJM3.1	transcription factor BIM1 isoform X2 [Arachis duranensis]
arahy.Tifrunner.gnm1.ann1.Z2QY1L.1	804	S	kinesin-4 [Arachis ipaensis]		arahy.Tifrunner.gnm1.ann1.0RL0PX.1	1108	S	LOW QUALITY PROTEIN: DEAD-box ATP-dependent RNA helicase 40-like [Arachis ipaensis]		arahy.Tifrunner.gnm1.ann1.62L32R.1	138	S	polyadenylate-binding protein-interacting protein 3-like isoform X2 [Arachis ipaensis]		arahy.Tifrunner.gnm1.ann1.A7W6G1.1	E3 SUMO-protein ligase SIZ1-like [Arachis ipaensis]
arahy.Tifrunner.gnm1.ann1.L9F1QW.2	71	Y	LETM1-like protein [Medicago truncatula]		arahy.Tifrunner.gnm1.ann1.I1BHDP.2	65	S	protein GLE1 [Arachis ipaensis]		arahy.Tifrunner.gnm1.ann1.62L32R.1	445	S	polyadenylate-binding protein-interacting protein 3-like isoform X2 [Arachis ipaensis]		arahy.Tifrunner.gnm1.ann1.A82XLX.1	chloride channel protein CLC-c-like [Arachis ipaensis]
arahy.Tifrunner.gnm1.ann1.XWU7PI.2	101	S	Hop-interacting protein THI034 [Solanum lycopersicum]		arahy.Tifrunner.gnm1.ann1.09XT1N.1	337	S	probable protein S-acyltransferase 7 [Arachis duranensis]		arahy.Tifrunner.gnm1.ann1.632UCW.1	32	S	pheromone receptor-like protein [Medicago truncatula]		arahy.Tifrunner.gnm1.ann1.A863J5.1	"glutamine synthetase leaf isozyme, chloroplastic [Arachis ipaensis]"
arahy.Tifrunner.gnm1.ann1.SM0BS0.1	634	S	"zinc knuckle (CCHC-type) family protein, putative [Medicago truncatula]"		arahy.Tifrunner.gnm1.ann1.4P5PRD.2	463	S	nucleolin 2 isoform X1 [Glycine max]		arahy.Tifrunner.gnm1.ann1.632UCW.1	36	S	pheromone receptor-like protein [Medicago truncatula]		arahy.Tifrunner.gnm1.ann1.A91792	casein kinase I-like [Arachis ipaensis]
arahy.Tifrunner.gnm1.ann1.PB2NQ7.1	126	S	serine/threonine-protein kinase dst2 isoform X5 [Arachis ipaensis]		arahy.Tifrunner.gnm1.ann1.QC4E5N.1	187	S	endonuclease/exonuclease/phosphatase family protein [Medicago truncatula]		arahy.Tifrunner.gnm1.ann1.632UCW.1	133	S	pheromone receptor-like protein [Medicago truncatula]		arahy.Tifrunner.gnm1.ann1.A992JM.1	protein SGT1 homolog [Arachis duranensis]
arahy.Tifrunner.gnm1.ann1.FXEC3Q.1	127	S	"2,3-dimethylmalate lyase-like isoform X1 [Arachis ipaensis]"		arahy.Tifrunner.gnm1.ann1.P6P9CF.1	713	S	GYF domain protein [Medicago truncatula]		arahy.Tifrunner.gnm1.ann1.632UCW.1	186	S	pheromone receptor-like protein [Medicago truncatula]		arahy.Tifrunner.gnm1.ann1.A9Q4ZU.1	nucleolin-like isoform X2 [Glycine max]
arahy.Tifrunner.gnm1.ann1.X3YRCT.2	631	S	eukaryotic translation initiation factor 4G-like isoform X1 [Arachis duranensis]		arahy.Tifrunner.gnm1.ann1.JB3EIK.1	938	T	plasma membrane ATPase 4 [Arachis duranensis]		arahy.Tifrunner.gnm1.ann1.632UCW.1	188	S	pheromone receptor-like protein [Medicago truncatula]		arahy.Tifrunner.gnm1.ann1.A9UZA5.1	RNA-binding protein 38 isoform X2 [Arachis duranensis]
arahy.Tifrunner.gnm1.ann1.5RAP3T.1	1126	S	pre-mRNA-processing factor 17 [Arachis ipaensis]		arahy.Tifrunner.gnm1.ann1.LY71N7.2	555	S	OBERON-like protein [Arachis ipaensis]		arahy.Tifrunner.gnm1.ann1.63GP52.1	60	S	"chlorophyll a-b binding protein CP29.3, chloroplastic [Arachis ipaensis]"		arahy.Tifrunner.gnm1.ann1.AAAS11	E3 ubiquitin-protein ligase HERC2-like [Arachis ipaensis]
arahy.Tifrunner.gnm1.ann1.9UJZ67.1	512	S	sorting nexin carboxy-terminal protein [Medicago truncatula]		arahy.Tifrunner.gnm1.ann1.7WKR24.1	617	S	eukaryotic translation initiation factor 4G-like isoform X1 [Arachis duranensis]		arahy.Tifrunner.gnm1.ann1.63GP52.1	61	S	"chlorophyll a-b binding protein CP29.3, chloroplastic [Arachis ipaensis]"		arahy.Tifrunner.gnm1.ann1.AB1T8P.3	transcription elongation factor TFIIS [Arachis ipaensis]
arahy.Tifrunner.gnm1.ann1.5P4QKH.1	145	S	"protein SUPPRESSOR OF GENE SILENCING 3 homolog, partial [Arachis duranensis]"		arahy.Tifrunner.gnm1.ann1.Y4TJ2Z.1	416	S	serine/threonine-protein kinase EDR1 [Arachis ipaensis]		arahy.Tifrunner.gnm1.ann1.63P8XR.1	230	S	nuclear pore complex protein NUP50A [Arachis ipaensis]		arahy.Tifrunner.gnm1.ann1.AC2PA2.1	zinc finger protein [Medicago truncatula]
arahy.Tifrunner.gnm1.ann1.F33GX9.2	268	S	probable inactive receptor-like protein kinase At3g56050 [Arachis ipaensis]		arahy.Tifrunner.gnm1.ann1.A7SJM3.1	279	T	transcription factor BIM1 isoform X2 [Arachis duranensis]		arahy.Tifrunner.gnm1.ann1.63P8XR.1	231	S	nuclear pore complex protein NUP50A [Arachis ipaensis]		arahy.Tifrunner.gnm1.ann1.AC5YYZ.1	dnaJ homolog subfamily B member 1 [Arachis duranensis]
arahy.Tifrunner.gnm1.ann1.UP9I24.2	360	S	ADP-ribosylation factor GTPase-activating protein AGD3 [Arachis ipaensis]		arahy.Tifrunner.gnm1.ann1.E79XBB.2	144	S	vacuolar amino acid transporter 1-like isoform X1 [Arachis ipaensis]		arahy.Tifrunner.gnm1.ann1.63P8XR.1	431	S	nuclear pore complex protein NUP50A [Arachis ipaensis]		arahy.Tifrunner.gnm1.ann1.AC6B4W.2	mitochondrial inner membrane protease subunit 2-like [Arachis duranensis]
arahy.Tifrunner.gnm1.ann1.8UC4TV.2	766	S	TIR class disease resistance protein [Medicago truncatula]		arahy.Tifrunner.gnm1.ann1.VL1078.1	641	S	protein PLASTID MOVEMENT IMPAIRED 2 [Arachis ipaensis]		arahy.Tifrunner.gnm1.ann1.63P8XR.1	441	S	nuclear pore complex protein NUP50A [Arachis ipaensis]		arahy.Tifrunner.gnm1.ann1.AC7664.1	LOW QUALITY PROTEIN: cysteine protease ATG4-like [Arachis ipaensis]
arahy.Tifrunner.gnm1.ann1.I0BTND.1	180	S	cyclin-dependent kinase inhibitor 5-like isoform X1 [Arachis duranensis]		arahy.Tifrunner.gnm1.ann1.AUV3TU.1	18	S	stem-specific protein TSJT1 [Arachis duranensis]		arahy.Tifrunner.gnm1.ann1.63W3DY.2	168	S	"peptidyl-prolyl cis-trans isomerase FKBP20-2, chloroplastic [Arachis duranensis]"		arahy.Tifrunner.gnm1.ann1.AD012R.1	protein NRT1/ PTR FAMILY 6.1 [Arachis ipaensis]
arahy.Tifrunner.gnm1.ann1.M8Q52W.2	27	T	LOW QUALITY PROTEIN: calcium-dependent protein kinase 29 [Cicer arietinum]		arahy.Tifrunner.gnm1.ann1.H1BIFD.1	283	S	heterogeneous nuclear ribonucleoprotein 1-like [Arachis ipaensis]		arahy.Tifrunner.gnm1.ann1.63XCF8.2	295	S	heterogeneous nuclear ribonucleoprotein 1-like isoform X1 [Arachis ipaensis]		arahy.Tifrunner.gnm1.ann1.AD2TJP.1	M-phase phosphoprotein 6 [Vigna radiata var. radiata]
arahy.Tifrunner.gnm1.ann1.4BR56W.1	164	T	AMP deaminase-like [Arachis ipaensis]		arahy.Tifrunner.gnm1.ann1.SJZ9IC.1	840	S	RNA-binding protein 25 isoform X1 [Arachis duranensis]		arahy.Tifrunner.gnm1.ann1.63Z2XK.2	218	S	protein RER1A-like [Arachis duranensis]		arahy.Tifrunner.gnm1.ann1.ADA7T8.2	enhancer of mRNA-decapping protein 4-like isoform X3 [Arachis duranensis]
arahy.Tifrunner.gnm1.ann1.N9AH7W.1	13	S	DEAD-box ATP-dependent RNA helicase 38-like [Arachis duranensis]		arahy.Tifrunner.gnm1.ann1.NFUI4Q.1	59	S	uncharacterized LOC100278418 [Zea mays]		arahy.Tifrunner.gnm1.ann1.6441EL.1	77	S	translation machinery associated TMA7 protein [Medicago truncatula]		arahy.Tifrunner.gnm1.ann1.ADUU08.1	protein ABIL2 isoform X1 [Arachis ipaensis]
arahy.Tifrunner.gnm1.ann1.2H5V0G.1	164	S	ultraviolet-B receptor UVR8-like [Arachis ipaensis]		arahy.Tifrunner.gnm1.ann1.Z7WG4W.1	98	S	ninja-family protein AFP3-like [Arachis duranensis]		arahy.Tifrunner.gnm1.ann1.648X0I.1	34	S	protein DETOXIFICATION 40-like [Arachis ipaensis]		arahy.Tifrunner.gnm1.ann1.AE82WW.1	sterol 3-beta-glucosyltransferase UGT80A2-like isoform X5 [Glycine max]
arahy.Tifrunner.gnm1.ann1.Z0P5BB.1	414	S	probable receptor-like protein kinase At5g15080 [Arachis ipaensis]		arahy.Tifrunner.gnm1.ann1.JE1LMX.1	150	S	serine/arginine-rich splicing factor RSZ21-like isoform X1 [Arachis ipaensis]		arahy.Tifrunner.gnm1.ann1.649GVM.1	98	S	HMG-Y-related protein A-like [Arachis ipaensis]		arahy.Tifrunner.gnm1.ann1.AE9G42	dystrophia myotonica WD repeat-containing protein-like [Arachis ipaensis]
arahy.Tifrunner.gnm1.ann1.734U7E.1	716	S	protein MEI2-like 4 isoform X1 [Arachis ipaensis]		arahy.Tifrunner.gnm1.ann1.MCG1UL.1	184	S	evolutionarily carboxy-terminal region protein [Medicago truncatula]		arahy.Tifrunner.gnm1.ann1.649J27.1	834	S	epidermal growth factor receptor substrate 15-like 1 isoform X1 [Arachis ipaensis]		arahy.Tifrunner.gnm1.ann1.AEQW57.1	golgin subfamily A member 2 [Arachis duranensis]
arahy.Tifrunner.gnm1.ann1.Y10HXA.1	124	S	V-type proton ATPase subunit F [Arachis duranensis]		arahy.Tifrunner.gnm1.ann1.KA488U.2	466	S	peptidyl-prolyl cis-trans isomerase CYP59 [Arachis duranensis]		arahy.Tifrunner.gnm1.ann1.649J27.1	838	S	epidermal growth factor receptor substrate 15-like 1 isoform X1 [Arachis ipaensis]		arahy.Tifrunner.gnm1.ann1.AG2MXP.1	amino acid permease 3 [Arachis duranensis]
arahy.Tifrunner.gnm1.ann1.3D2TC1.2	80	S	serine/threonine-protein kinase D6PKL1 [Arachis ipaensis]		arahy.Tifrunner.gnm1.ann1.YUJY33.1	263	S	DCD (development and cell death) domain protein [Medicago truncatula]		arahy.Tifrunner.gnm1.ann1.649J27.1	847	S	epidermal growth factor receptor substrate 15-like 1 isoform X1 [Arachis ipaensis]		arahy.Tifrunner.gnm1.ann1.AG49X2	protein decapping 5-like isoform X1 [Arachis ipaensis]
arahy.Tifrunner.gnm1.ann1.MHQ5U3.1	128	S	transcription factor RF2b-like [Arachis duranensis]		arahy.Tifrunner.gnm1.ann1.YQJ5CI.1	143	S	binding partner of ACD11 1-like [Arachis duranensis]		arahy.Tifrunner.gnm1.ann1.649J27.1	889	S	epidermal growth factor receptor substrate 15-like 1 isoform X1 [Arachis ipaensis]		arahy.Tifrunner.gnm1.ann1.AGT1RS.1	zinc finger protein HD1 [Vigna radiata var. radiata]
arahy.Tifrunner.gnm1.ann1.NK6UX8.1	5	S	protein NUCLEAR FUSION DEFECTIVE 4 [Arachis duranensis]		arahy.Tifrunner.gnm1.ann1.P4S7LA.1	521	S	MACPF domain-containing protein At1g14780-like [Arachis ipaensis]		arahy.Tifrunner.gnm1.ann1.649J27.1	949	S	epidermal growth factor receptor substrate 15-like 1 isoform X1 [Arachis ipaensis]		arahy.Tifrunner.gnm1.ann1.AHB8GW.1	phosphatidylinositol 4-kinase alpha 1 [Arachis duranensis]
arahy.Tifrunner.gnm1.ann1.FZU8AD.2	224	S	probable WRKY transcription factor 31 [Arachis ipaensis]		arahy.Tifrunner.gnm1.ann1.R9RUHP.1	39	S	"vacuolar protein sorting-associated protein 54, chloroplastic [Arachis ipaensis]"		arahy.Tifrunner.gnm1.ann1.649J27.1	1002	S	epidermal growth factor receptor substrate 15-like 1 isoform X1 [Arachis ipaensis]		arahy.Tifrunner.gnm1.ann1.AI2V23.1
arahy.Tifrunner.gnm1.ann1.018Q39.2	487	S	protein STRUBBELIG-RECEPTOR FAMILY 3-like [Arachis ipaensis]		arahy.Tifrunner.gnm1.ann1.CVJ130.1	110	T	"chlorophyll a-b binding protein CP29.2, chloroplastic-like [Arachis duranensis]"		arahy.Tifrunner.gnm1.ann1.64EDPK.1	30	S	"probable receptor-like serine/threonine-protein kinase At5g57670, partial [Arachis duranensis]"		arahy.Tifrunner.gnm1.ann1.AIGQ5R.1	seed linoleate 9S-lipoxygenase-like [Arachis duranensis]
arahy.Tifrunner.gnm1.ann1.D8DRS0.1	130	S	reticulon-like protein B21 [Arachis duranensis]		arahy.Tifrunner.gnm1.ann1.JSLQ1D.1	83	S	DNA-binding protein DDB_G0278111 isoform X2 [Arachis ipaensis]		arahy.Tifrunner.gnm1.ann1.64XDM2.1	99	S	nuclear pore complex protein NUP35 isoform X2 [Arachis duranensis]		arahy.Tifrunner.gnm1.ann1.AK1NBZ.1	WD repeat-containing protein 55 isoform X2 [Arachis ipaensis]
arahy.Tifrunner.gnm1.ann1.S2SRDX.3	91	S	protein DEHYDRATION-INDUCED 19 homolog 7-like [Arachis ipaensis]		arahy.Tifrunner.gnm1.ann1.HGX6IC.1	243	S	protein FAM63B [Vigna angularis]		arahy.Tifrunner.gnm1.ann1.64XDM2.1	106	S	nuclear pore complex protein NUP35 isoform X2 [Arachis duranensis]		arahy.Tifrunner.gnm1.ann1.AKP9L1	sister chromatid cohesion 1 protein 4 [Arachis ipaensis]
arahy.Tifrunner.gnm1.ann1.CP2NGN.1	166	S	serine/threonine-protein kinase SRK2E [Arachis duranensis]		arahy.Tifrunner.gnm1.ann1.M530PZ.1	1573	S	protein NETWORKED 1D [Arachis ipaensis]		arahy.Tifrunner.gnm1.ann1.64XDM2.1	315	S	nuclear pore complex protein NUP35 isoform X2 [Arachis duranensis]		arahy.Tifrunner.gnm1.ann1.AM2AK0.1	clathrin heavy chain 1-like [Arachis ipaensis]
arahy.Tifrunner.gnm1.ann1.6QNX53.1	588	S	trypsin family protein [Medicago truncatula]		arahy.Tifrunner.gnm1.ann1.QS45GW.3	528	S	peptidyl-prolyl cis-trans isomerase CYP63 [Arachis ipaensis]		arahy.Tifrunner.gnm1.ann1.653NH4.2	342	S	autophagy-related protein 18a-like [Arachis ipaensis]		arahy.Tifrunner.gnm1.ann1.AM7351	zinc finger protein JACKDAW-like isoform X2 [Glycine max]
arahy.Tifrunner.gnm1.ann1.0DR8LC.1	13	S	UDP-N-acetylglucosamine--dolichyl-phosphate N-acetylglucosaminephosphotransferase [Arachis duranensis]		arahy.Tifrunner.gnm1.ann1.4BR56W.1	173	S	AMP deaminase-like [Arachis ipaensis]		arahy.Tifrunner.gnm1.ann1.65X03I.2	85	S			arahy.Tifrunner.gnm1.ann1.AM9K84.1	dual specificity protein kinase shkE-like [Lupinus angustifolius]
arahy.Tifrunner.gnm1.ann1.ZASQ2Z.1	33	S	late embryogenesis abundant protein [Medicago truncatula]		arahy.Tifrunner.gnm1.ann1.A0F858.1	218	S	splicing factor U2af small subunit B-like [Arachis ipaensis]		arahy.Tifrunner.gnm1.ann1.66KNZL.1	652	S	serine/threonine-protein phosphatase BSL3 [Arachis ipaensis]		arahy.Tifrunner.gnm1.ann1.AMG8U1	thylakoid soluble phosphoprotein TSP9 protein [Medicago truncatula]
arahy.Tifrunner.gnm1.ann1.NDAY03.1	263	S	linoleate 9S-lipoxygenase-like [Arachis ipaensis]		arahy.Tifrunner.gnm1.ann1.1PUV9L.1	110	S	protein JASON-like isoform X1 [Arachis ipaensis]		arahy.Tifrunner.gnm1.ann1.66KNZL.1	969	S	serine/threonine-protein phosphatase BSL3 [Arachis ipaensis]		arahy.Tifrunner.gnm1.ann1.AQ6XA1	WD-40 repeat-containing protein MSI4 isoform X1 [Arachis ipaensis]
arahy.Tifrunner.gnm1.ann1.2YXT8K.4	104	S	mitogen-activated protein kinase kinase kinase YODA-like [Arachis duranensis]		arahy.Tifrunner.gnm1.ann1.M3DPW3.1	136	S	protein EMSY-LIKE 3-like isoform X1 [Arachis duranensis]		arahy.Tifrunner.gnm1.ann1.66PPWS.1	22	S	nematode resistance protein-like HSPRO2 [Arachis ipaensis]		arahy.Tifrunner.gnm1.ann1.AQF1TQ.1	protein furry homolog isoform X1 [Glycine max]
arahy.Tifrunner.gnm1.ann1.B9QDDU.1	225	S	auxin efflux carrier component 2 [Arachis ipaensis]		arahy.Tifrunner.gnm1.ann1.81342Q.1	64	S	UPF0695 membrane protein C977.11/PB8B6.06c [Arachis ipaensis]		arahy.Tifrunner.gnm1.ann1.67E0CQ.1	12	S	glutathione S-transferase F9-like [Arachis ipaensis]		arahy.Tifrunner.gnm1.ann1.AR272K.2	"putative methylesterase 12, chloroplastic isoform X2 [Arachis ipaensis]"
arahy.Tifrunner.gnm1.ann1.Y4ABT1.2	557	S	centromere-associated protein E [Arachis duranensis]		arahy.Tifrunner.gnm1.ann1.X4KYJQ.3	31	S	sugar transporter ERD6-like 6 [Arachis duranensis]		arahy.Tifrunner.gnm1.ann1.67HF21.2	313	S	UDP-galactose transporter 2-like [Arachis ipaensis]		arahy.Tifrunner.gnm1.ann1.ASR65M.1	vesicle-associated membrane protein 721-like [Arachis duranensis]
arahy.Tifrunner.gnm1.ann1.AUQB01.1	141	S	latex abundant protein 1 [Populus trichocarpa]		arahy.Tifrunner.gnm1.ann1.LQ82RV.1	425	S	cyclin-L1-1 [Arachis ipaensis]		arahy.Tifrunner.gnm1.ann1.67PT2S.1	184	S	trihelix transcription factor ASIL1-like [Arachis duranensis]		arahy.Tifrunner.gnm1.ann1.ATF0F7.2	J domain-containing protein required for chloroplast accumulation response 1 [Arachis ipaensis]
arahy.Tifrunner.gnm1.ann1.WX09DK.2	259	S	CCR4-NOT transcription complex subunit 3-like isoform X1 [Arachis duranensis]		arahy.Tifrunner.gnm1.ann1.827X5P.1	9	S	DUF810 family protein [Medicago truncatula]		arahy.Tifrunner.gnm1.ann1.67PT2S.1	228	S	trihelix transcription factor ASIL1-like [Arachis duranensis]		arahy.Tifrunner.gnm1.ann1.AU4LT2.1	SCY1-like protein 2 [Arachis duranensis]
arahy.Tifrunner.gnm1.ann1.2FQ9M1.2	612	S	transcriptional corepressor SEUSS [Arachis ipaensis]		arahy.Tifrunner.gnm1.ann1.7TG5YP.1	130	S	heavy metal-associated isoprenylated plant protein 26 [Arachis ipaensis]		arahy.Tifrunner.gnm1.ann1.67TC14.1	16	S	acyl-CoA thioesterase [Medicago truncatula]		arahy.Tifrunner.gnm1.ann1.AUQB01.1	latex abundant protein 1 [Populus trichocarpa]
arahy.Tifrunner.gnm1.ann1.01DGNM.1	282	S			arahy.Tifrunner.gnm1.ann1.RFF9M1.1	24	S	influenza virus NS1A-binding protein-like [Lupinus angustifolius]		arahy.Tifrunner.gnm1.ann1.68AXR1	22	S	mitogen-activated protein kinase 9-like [Arachis ipaensis]		arahy.Tifrunner.gnm1.ann1.AUV3TU.1	stem-specific protein TSJT1 [Arachis duranensis]
arahy.Tifrunner.gnm1.ann1.1B7IGJ.1	93	S	probable WRKY transcription factor 47 [Arachis ipaensis]		arahy.Tifrunner.gnm1.ann1.D9ZPCT.4	118	S	protein SCAI [Arachis ipaensis]		arahy.Tifrunner.gnm1.ann1.68AXR1	487	S	mitogen-activated protein kinase 9-like [Arachis ipaensis]		arahy.Tifrunner.gnm1.ann1.AUY1K1.1	putative HVA22-like protein g isoform X2 [Arachis ipaensis]
arahy.Tifrunner.gnm1.ann1.N9X86H.1	218	S	protein MON2 homolog [Arachis ipaensis]		arahy.Tifrunner.gnm1.ann1.XWXJ6Y.1	901	S	filaggrin [Arachis ipaensis]		arahy.Tifrunner.gnm1.ann1.68AZQV.2	20	S	protein BTR1 [Arachis ipaensis]		arahy.Tifrunner.gnm1.ann1.AVE6N2	sister chromatid cohesion protein PDS5 homolog A-like isoform X1 [Arachis duranensis]
arahy.Tifrunner.gnm1.ann1.VKZX5F.1	159	S	plant/F14N23-31 protein [Medicago truncatula]		arahy.Tifrunner.gnm1.ann1.Z2MV1Y.1	1560	S	brefeldin A-inhibited guanine nucleotide-exchange protein 5 [Arachis ipaensis]		arahy.Tifrunner.gnm1.ann1.68RZIY.1	171	S	probable inactive histone-lysine N-methyltransferase SUVR2 [Arachis duranensis]		arahy.Tifrunner.gnm1.ann1.AVGT3S.2	polyadenylate-binding protein 8 [Arachis duranensis]
arahy.Tifrunner.gnm1.ann1.HAW4XI.1	199	S	hypersensitive-induced response protein 2-like [Arachis ipaensis]		arahy.Tifrunner.gnm1.ann1.861X9K.2	608	S	protein EFR3 homolog B-like isoform X2 [Arachis ipaensis]		arahy.Tifrunner.gnm1.ann1.68WCM1	501	S	synaptotagmin-5 [Arachis ipaensis]		arahy.Tifrunner.gnm1.ann1.AWZ402	formin-like protein 13 [Arachis duranensis]
arahy.Tifrunner.gnm1.ann1.S9C4R7.1	58	S	membrane steroid-binding protein 2-like [Arachis duranensis]		arahy.Tifrunner.gnm1.ann1.Y91V86.3	927	S	"phosphoenolpyruvate carboxylase, housekeeping isozyme [Cajanus cajan]"		arahy.Tifrunner.gnm1.ann1.68WCM1	503	S	synaptotagmin-5 [Arachis ipaensis]		arahy.Tifrunner.gnm1.ann1.AX840Y.1	enolase 2-like [Arachis ipaensis]
arahy.Tifrunner.gnm1.ann1.LLLD9E.1	212	S	PH-response transcription factor [Arabidopsis thaliana]		arahy.Tifrunner.gnm1.ann1.JY4CMX.1	139	S	histone H2A-like [Arachis duranensis]		arahy.Tifrunner.gnm1.ann1.69CB9U.1	248	S	tetratricopeptide repeat protein 1-like [Arachis duranensis]		arahy.Tifrunner.gnm1.ann1.AX9XXP.1	"zinc ion-binding protein, putative [Medicago truncatula]"
arahy.Tifrunner.gnm1.ann1.R2BN40.1	473	T	serine/threonine-protein kinase STY46-like [Arachis ipaensis]		arahy.Tifrunner.gnm1.ann1.D9ZPCT.4	347	S	protein SCAI [Arachis ipaensis]		arahy.Tifrunner.gnm1.ann1.69CRNN.3	341	S	"BEL1-like homeodomain protein 4, partial [Arachis ipaensis]"		arahy.Tifrunner.gnm1.ann1.AY0C62	beta-adaptin-like protein B isoform X1 [Arachis duranensis]
arahy.Tifrunner.gnm1.ann1.E2R4RP.1	37	S	LOW QUALITY PROTEIN: mediator of RNA polymerase II transcription subunit 14-like [Arachis duranensis]		arahy.Tifrunner.gnm1.ann1.NR3S8D.1	26	S	NADPH:quinone oxidoreductase-like [Arachis ipaensis]		arahy.Tifrunner.gnm1.ann1.69LNNJ.2	89	S	"phosphatidylinositol 3,4,5-trisphosphate 3-phosphatase and protein-tyrosine-phosphatase PTEN2A-like[Arachis duranensis]"		arahy.Tifrunner.gnm1.ann1.AZ4556.2	protein gar2 [Arachis ipaensis]
arahy.Tifrunner.gnm1.ann1.VJ5QJ8.1	346	S	myb family transcription factor EFM [Vigna angularis]		arahy.Tifrunner.gnm1.ann1.CT2MPD.1	12	S	protein BRASSINAZOLE-RESISTANT 1 [Arachis ipaensis]		arahy.Tifrunner.gnm1.ann1.69LNNJ.2	143	S	"phosphatidylinositol 3,4,5-trisphosphate 3-phosphatase and protein-tyrosine-phosphatase PTEN2A-like[Arachis duranensis]"		arahy.Tifrunner.gnm1.ann1.AZ81U3.1	FRIGIDA-like protein 4a [Arachis duranensis]
arahy.Tifrunner.gnm1.ann1.33GLRJ.1	89	S	reticulon-like protein B5 [Arachis ipaensis]		arahy.Tifrunner.gnm1.ann1.RX6B2U.1	320	S	protein WVD2-like 5 isoform X1 [Arachis ipaensis]		arahy.Tifrunner.gnm1.ann1.69LNNJ.2	510	S	"phosphatidylinositol 3,4,5-trisphosphate 3-phosphatase and protein-tyrosine-phosphatase PTEN2A-like[Arachis duranensis]"		arahy.Tifrunner.gnm1.ann1.B0P3F3	U2 snRNP-associated SURP motif-containing protein-like [Arachis duranensis]
arahy.Tifrunner.gnm1.ann1.G8RZTB.1	183	S	mucin-5AC-like [Arachis ipaensis]		arahy.Tifrunner.gnm1.ann1.R76IPR.1	1721	S	LOW QUALITY PROTEIN: THO complex subunit 2 [Arachis ipaensis]		arahy.Tifrunner.gnm1.ann1.69QRE7.1	62	S	homeobox-leucine zipper protein HAT7-like isoform X1 [Arachis duranensis]		arahy.Tifrunner.gnm1.ann1.B0SKQ1	NDR1/HIN1-Like protein 3-like [Arachis ipaensis]
arahy.Tifrunner.gnm1.ann1.HGTY5Y.2	393	S	UDP-glucose 6-dehydrogenase 1-like [Arachis ipaensis]		arahy.Tifrunner.gnm1.ann1.J9ASUV.1	162	S	"myosin heavy chain, striated muscle [Cajanus cajan]"		arahy.Tifrunner.gnm1.ann1.69X35Q.2	292	S	DNA polymerase delta subunit 3 isoform X1 [Arachis ipaensis]		arahy.Tifrunner.gnm1.ann1.B1IT4T.1	multiprotein-bridging factor 1a [Arachis ipaensis]
arahy.Tifrunner.gnm1.ann1.CP2NGN.1	175	S	serine/threonine-protein kinase SRK2E [Arachis duranensis]		arahy.Tifrunner.gnm1.ann1.7F1JQP.1	152	S	ABA-responsive protein ABR17-like [Arachis ipaensis]		arahy.Tifrunner.gnm1.ann1.69X35Q.2	421	S	DNA polymerase delta subunit 3 isoform X1 [Arachis ipaensis]		arahy.Tifrunner.gnm1.ann1.B2269S.1
arahy.Tifrunner.gnm1.ann1.HYI70A.1	1325	S	"tRNA(adenine(34)) deaminase, chloroplastic [Arachis duranensis]"		arahy.Tifrunner.gnm1.ann1.93GJX5.3	232	S	cyclin-dependent kinase G-2 [Arachis duranensis]		arahy.Tifrunner.gnm1.ann1.6AJ8U6.1	300	S	protein SCAR2-like [Arachis ipaensis]		arahy.Tifrunner.gnm1.ann1.B2BEU5	nucleotide-binding protein [Medicago truncatula]
arahy.Tifrunner.gnm1.ann1.B3C57W.3	235	T	autophagy-related protein 13a-like isoform X2 [Arachis ipaensis]		arahy.Tifrunner.gnm1.ann1.9BC44J.1	76	S	"myosin heavy chain, striated muscle [Cajanus cajan]"		arahy.Tifrunner.gnm1.ann1.6BI416.1	8	S	acyl-CoA-binding domain-containing protein 4 [Arachis ipaensis]		arahy.Tifrunner.gnm1.ann1.B2KMH2	LOW QUALITY PROTEIN: inducible nitrate reductase [NADH] 2 [Arachis ipaensis]
arahy.Tifrunner.gnm1.ann1.57MKXC.2	40	S	"protein CHUP1, chloroplastic isoform X3 [Arachis duranensis]"		arahy.Tifrunner.gnm1.ann1.N8NJUA.1	527	T	receptor-like kinase TMK4 [Arachis ipaensis]		arahy.Tifrunner.gnm1.ann1.6BI416.1	30	S	acyl-CoA-binding domain-containing protein 4 [Arachis ipaensis]		arahy.Tifrunner.gnm1.ann1.B3B375.2	ecotropic viral integration site 5 ortholog [Arachis ipaensis]
arahy.Tifrunner.gnm1.ann1.U5VJX8.3	431	T	B3 domain-containing protein Os07g0563300-like isoform X1 [Arachis ipaensis]		arahy.Tifrunner.gnm1.ann1.LT4L2L.1	447	S	"protein CHUP1, chloroplastic isoform X1 [Arachis ipaensis]"		arahy.Tifrunner.gnm1.ann1.6BI416.1	462	S	acyl-CoA-binding domain-containing protein 4 [Arachis ipaensis]		arahy.Tifrunner.gnm1.ann1.B3C57W.3	autophagy-related protein 13a-like isoform X2 [Arachis ipaensis]
arahy.Tifrunner.gnm1.ann1.TYGW7M.1	16	S	"tryptophan synthase beta chain 2, chloroplastic [Arachis duranensis]"		arahy.Tifrunner.gnm1.ann1.PB2NQ7.1	648	T	serine/threonine-protein kinase dst2 isoform X5 [Arachis ipaensis]		arahy.Tifrunner.gnm1.ann1.6BI416.1	478	S	acyl-CoA-binding domain-containing protein 4 [Arachis ipaensis]		arahy.Tifrunner.gnm1.ann1.B3LIJ1	protein-L-isoaspartate O-methyltransferase 1-like isoform X1 [Arachis duranensis]
arahy.Tifrunner.gnm1.ann1.F9CV5S.1	511	S	villin-4-like [Arachis ipaensis]		arahy.Tifrunner.gnm1.ann1.CZ3U7F.1	29	S	"probable serine/threonine-protein kinase Cx32, chloroplastic [Arachis ipaensis]"		arahy.Tifrunner.gnm1.ann1.6BML15.1	115	S	topoisomerase II-associated protein PAT1 [Medicago truncatula]		arahy.Tifrunner.gnm1.ann1.B47L6X.1	"zinc finger, C3HC4 type (RING finger) protein [Medicago truncatula]"
arahy.Tifrunner.gnm1.ann1.4WKV82.1	393	S	"calcium sensing receptor, chloroplastic [Arachis ipaensis]"		arahy.Tifrunner.gnm1.ann1.Z8UC8R.1	281	S	rhomboid-like protein 15 [Arachis ipaensis]		arahy.Tifrunner.gnm1.ann1.6BML15.1	171	S	topoisomerase II-associated protein PAT1 [Medicago truncatula]		arahy.Tifrunner.gnm1.ann1.B4KLFS.1
arahy.Tifrunner.gnm1.ann1.R6E3N5.1	278	S	RNA-binding protein 5 isoform X3 [Arachis duranensis]		arahy.Tifrunner.gnm1.ann1.R6BV62.1	473	S	eukaryotic translation initiation factor 4B2-like [Arachis ipaensis]		arahy.Tifrunner.gnm1.ann1.6BML15.1	234	S	topoisomerase II-associated protein PAT1 [Medicago truncatula]		arahy.Tifrunner.gnm1.ann1.B4LZ3P.1	zinc finger family protein [Populus trichocarpa]
arahy.Tifrunner.gnm1.ann1.L9DXTM.1	344	S	ribosomal RNA-processing protein 14-like [Arachis ipaensis]		arahy.Tifrunner.gnm1.ann1.A2IS88.1	228	S	protein EDS1-like [Arachis ipaensis]		arahy.Tifrunner.gnm1.ann1.6BML15.1	247	S	topoisomerase II-associated protein PAT1 [Medicago truncatula]		arahy.Tifrunner.gnm1.ann1.B4WRN4.1	coilin isoform X1 [Arachis ipaensis]
arahy.Tifrunner.gnm1.ann1.L63P0H.1	12	S	zinc finger CCCH domain-containing protein 25-like [Arachis duranensis]		arahy.Tifrunner.gnm1.ann1.UK6EYH.1	3	S	histone H2A-like [Arachis duranensis]		arahy.Tifrunner.gnm1.ann1.6BML15.1	259	S	topoisomerase II-associated protein PAT1 [Medicago truncatula]		arahy.Tifrunner.gnm1.ann1.B5GTII.1	WD repeat-containing protein 75 isoform X1 [Arachis duranensis]
arahy.Tifrunner.gnm1.ann1.J26PKP.1	106	S	probable serine/threonine-protein kinase DDB_G0282963 [Arachis ipaensis]		arahy.Tifrunner.gnm1.ann1.MG6I4X.2	387	S	Sn1-specific diacylglycerol lipase alpha [Morus notabilis]		arahy.Tifrunner.gnm1.ann1.6BML15.1	327	S	topoisomerase II-associated protein PAT1 [Medicago truncatula]		arahy.Tifrunner.gnm1.ann1.B5VTG2	splicing factor U2af large subunit B-like [Arachis ipaensis]
arahy.Tifrunner.gnm1.ann1.TB2RSK.2	277	S	casein kinase I [Arachis ipaensis]		arahy.Tifrunner.gnm1.ann1.SFW5N9.1	336	T	"fructose-bisphosphate aldolase, cytoplasmic isozyme [Arachis duranensis]"		arahy.Tifrunner.gnm1.ann1.6BML15.1	542	S	topoisomerase II-associated protein PAT1 [Medicago truncatula]		arahy.Tifrunner.gnm1.ann1.B68HG1	cyclic dof factor 3 [Arachis ipaensis]
arahy.Tifrunner.gnm1.ann1.K23Z11.1	32	S	transcription factor VIP1 [Arachis duranensis]		arahy.Tifrunner.gnm1.ann1.ZVXK34.2	138	S	ubiquitin carboxyl-terminal hydrolase 6-like [Arachis duranensis]		arahy.Tifrunner.gnm1.ann1.6DQ39T.1	21	S	"chlorophyll a-b binding protein CP29.2, chloroplastic-like [Arachis ipaensis]"		arahy.Tifrunner.gnm1.ann1.B6N7K9.1	meiosis chromosome segregation family protein [Medicago truncatula]
arahy.Tifrunner.gnm1.ann1.LBLS7P.1	129	T	translocon at the outer membrane of chloroplasts 64 [Arachis ipaensis]		arahy.Tifrunner.gnm1.ann1.BMQ6HD.2	371	S	spidroin-1 [Arachis ipaensis]		arahy.Tifrunner.gnm1.ann1.6DQ39T.1	36	S	"chlorophyll a-b binding protein CP29.2, chloroplastic-like [Arachis ipaensis]"		arahy.Tifrunner.gnm1.ann1.B6QDWV.1	BZIP transcription factor [Medicago truncatula]
arahy.Tifrunner.gnm1.ann1.SX97YB.2	119	S	probable protein phosphatase 2C 10 [Arachis ipaensis]		arahy.Tifrunner.gnm1.ann1.WNIN40.1	57	S	homeobox-leucine zipper protein HAT4 [Arachis duranensis]		arahy.Tifrunner.gnm1.ann1.6DR1RM.1	80	S	protein ROOT HAIR DEFECTIVE 3-like [Arachis ipaensis]		arahy.Tifrunner.gnm1.ann1.B6YWY1	putative threonine aspartase [Arachis ipaensis]
arahy.Tifrunner.gnm1.ann1.8H8JUA.1	631	S	serine/arginine-rich splicing factor RS40 isoform X1 [Arachis duranensis]		arahy.Tifrunner.gnm1.ann1.WY2XWP.1	105	S	"sec-independent protein translocase protein TATC, chloroplastic [Ziziphus jujuba]"		arahy.Tifrunner.gnm1.ann1.6E9CR1	222	S	polyadenylation and cleavage factor homolog 4 [Arachis duranensis]		arahy.Tifrunner.gnm1.ann1.B7TU6S.2	ubiquitin carboxyl-terminal hydrolase 14 [Arachis ipaensis]
arahy.Tifrunner.gnm1.ann1.F9CV5S.1	589	T	villin-4-like [Arachis ipaensis]		arahy.Tifrunner.gnm1.ann1.YP2NLQ.2	873	S	ABC transporter C family member 8-like [Arachis ipaensis]		arahy.Tifrunner.gnm1.ann1.6E9CR1	283	S	polyadenylation and cleavage factor homolog 4 [Arachis duranensis]		arahy.Tifrunner.gnm1.ann1.B8DRML.1	oxidation resistance protein 1 [Arachis duranensis]
arahy.Tifrunner.gnm1.ann1.9UJZ67.1	508	S	sorting nexin carboxy-terminal protein [Medicago truncatula]		arahy.Tifrunner.gnm1.ann1.ICWX02.2	13	S	FHA domain-containing protein DDL [Arachis ipaensis]		arahy.Tifrunner.gnm1.ann1.6E9CR1	313	S	polyadenylation and cleavage factor homolog 4 [Arachis duranensis]		arahy.Tifrunner.gnm1.ann1.B8JBQ4.1	serine/threonine-protein kinase HT1 [Arachis ipaensis]
arahy.Tifrunner.gnm1.ann1.G7P63M.1	94	T	LOW QUALITY PROTEIN: SAP30-binding protein-like [Arachis duranensis]		arahy.Tifrunner.gnm1.ann1.VIL3TT.2	254	S	phosphatidylinositol-3-phosphatase myotubularin-1-like [Arachis ipaensis]		arahy.Tifrunner.gnm1.ann1.6F5IGY.1	41	S	protein PHLOEM PROTEIN 2-LIKE A1-like [Arachis ipaensis]		arahy.Tifrunner.gnm1.ann1.B8KV71	protein transport protein SEC16A homolog isoform X1 [Arachis ipaensis]
arahy.Tifrunner.gnm1.ann1.W71D15.3	255	S	testis-expressed sequence 2 protein-like [Arachis duranensis]		arahy.Tifrunner.gnm1.ann1.JCMX0M.1	118	S	DNA-binding protein SMUBP-2 [Arachis ipaensis]		arahy.Tifrunner.gnm1.ann1.6F5IGY.1	49	S	protein PHLOEM PROTEIN 2-LIKE A1-like [Arachis ipaensis]		arahy.Tifrunner.gnm1.ann1.B8M0J2	endoplasmic reticulum-Golgi intermediate compartment protein 3-like [Arachis ipaensis]
arahy.Tifrunner.gnm1.ann1.49JIZL.1	20	T	peroxisomal membrane protein PEX14 isoform X1 [Arachis ipaensis]		arahy.Tifrunner.gnm1.ann1.Y78IXY.1	363	S	putative UPF0481 protein At3g02645 [Arachis duranensis]		arahy.Tifrunner.gnm1.ann1.6F5IGY.1	85	S	protein PHLOEM PROTEIN 2-LIKE A1-like [Arachis ipaensis]		arahy.Tifrunner.gnm1.ann1.B8RZE1	probable serine/threonine-protein kinase DDB_G0286465 [Arachis ipaensis]
arahy.Tifrunner.gnm1.ann1.5HY1FK.1	215	S	rhomboid-like protein 20 isoform X2 [Arachis ipaensis]		arahy.Tifrunner.gnm1.ann1.897SEY.1	529	S	filaggrin [Arachis duranensis]		arahy.Tifrunner.gnm1.ann1.6F5IGY.1	91	S	protein PHLOEM PROTEIN 2-LIKE A1-like [Arachis ipaensis]		arahy.Tifrunner.gnm1.ann1.B8YDI3.1	serine/threonine-protein kinase CDL1-like [Arachis ipaensis]
arahy.Tifrunner.gnm1.ann1.Q9RGLK.1	492	S	U1 small nuclear ribonucleoprotein 70 kDa-like [Cajanus cajan]		arahy.Tifrunner.gnm1.ann1.GY6ZBB.2	570	S	protein NUCLEAR FUSION DEFECTIVE 4-like [Arachis ipaensis]		arahy.Tifrunner.gnm1.ann1.6F5IGY.1	135	S	protein PHLOEM PROTEIN 2-LIKE A1-like [Arachis ipaensis]		arahy.Tifrunner.gnm1.ann1.B97T9I.1	kinetochore protein spc25 isoform X1 [Arachis duranensis]
arahy.Tifrunner.gnm1.ann1.HI4H5F.1	594	T	N-terminal kinase-like protein [Arachis duranensis]		arahy.Tifrunner.gnm1.ann1.GEM3QE.1	128	S	LOW QUALITY PROTEIN: uncharacterized transporter C405.03c [Arachis duranensis]		arahy.Tifrunner.gnm1.ann1.6FX6NP.1	678	S	protein ENHANCED DISEASE RESISTANCE 4-like [Lupinus angustifolius]		arahy.Tifrunner.gnm1.ann1.B9QDDU.1	auxin efflux carrier component 2 [Arachis ipaensis]
arahy.Tifrunner.gnm1.ann1.0R8S6T.2	111	S	plant UBX domain-containing protein 4-like isoform X1 [Arachis duranensis]		arahy.Tifrunner.gnm1.ann1.06XI8G.1	624	S	"pentatricopeptide repeat-containing protein At1g26460, mitochondrial [Arachis duranensis]"		arahy.Tifrunner.gnm1.ann1.6G1AZV.1	114	S	homeobox protein LUMINIDEPENDENS [Arachis ipaensis]		arahy.Tifrunner.gnm1.ann1.BAH7Z0.1	probable pectin methyltransferase QUA2 [Arachis ipaensis]
arahy.Tifrunner.gnm1.ann1.C0K4NA.1	559	S	interactor of constitutive active ROPs 3 [Arachis ipaensis]		arahy.Tifrunner.gnm1.ann1.FAC3HW.1	482	S	eukaryotic translation initiation factor 4B2-like [Arachis duranensis]		arahy.Tifrunner.gnm1.ann1.6GE0SS.1	75	S	phytochrome E-like isoform X2 [Arachis ipaensis]		arahy.Tifrunner.gnm1.ann1.BAML41	"RING/FYVE/PHD zinc finger protein, putative [Medicago truncatula]"
arahy.Tifrunner.gnm1.ann1.AAAS1H.1	809	T	E3 ubiquitin-protein ligase HERC2-like [Arachis ipaensis]		arahy.Tifrunner.gnm1.ann1.7NR7Q4.1	299	S	serine/arginine-rich splicing factor SR45 [Arachis ipaensis]		arahy.Tifrunner.gnm1.ann1.6GE0SS.1	78	S	phytochrome E-like isoform X2 [Arachis ipaensis]		arahy.Tifrunner.gnm1.ann1.BAUB6M.1	tRNA pseudouridine synthase A [Arachis ipaensis]
arahy.Tifrunner.gnm1.ann1.YI4799.1	24	S	BTB/POZ domain-containing protein At1g03010-like isoform X1 [Arachis duranensis]		arahy.Tifrunner.gnm1.ann1.GW5Q3X.1	158	S	la-related protein 1B-like [Arachis duranensis]		arahy.Tifrunner.gnm1.ann1.6GG9QX.1	46	S	reticulon-like protein B3 [Arachis duranensis]		arahy.Tifrunner.gnm1.ann1.BB6RTX.2	CCR4-NOT transcription complex subunit 4-like [Lupinus angustifolius]
arahy.Tifrunner.gnm1.ann1.8R27D6.1	440	S	cell division cycle and apoptosis regulator protein 1 [Arachis duranensis]		arahy.Tifrunner.gnm1.ann1.Q4SW2C.2	14	S	tropinone reductase homolog At5g06060-like [Cajanus cajan]		arahy.Tifrunner.gnm1.ann1.6GG9QX.1	54	S	reticulon-like protein B3 [Arachis duranensis]		arahy.Tifrunner.gnm1.ann1.BC0AQ3.1	probable polygalacturonase At3g15720 [Vigna angularis]
arahy.Tifrunner.gnm1.ann1.U06LHF.1	17	S	protein MEI2-like 5 [Arachis duranensis]		arahy.Tifrunner.gnm1.ann1.9BC44J.1	92	S	"myosin heavy chain, striated muscle [Cajanus cajan]"		arahy.Tifrunner.gnm1.ann1.6H6W8R.2	628	S	octicosapeptide/phox/Bem1p domain kinase superfamily protein [Medicago truncatula]		arahy.Tifrunner.gnm1.ann1.BC49LP.1	branchpoint-bridging protein isoform X1 [Arachis ipaensis]
arahy.Tifrunner.gnm1.ann1.70Y970.1	182	S	ras-related protein RABA2a [Arachis ipaensis]		arahy.Tifrunner.gnm1.ann1.TG5V11.1	314	S	serine/threonine-protein phosphatase PP1 isozyme 3-like [Arachis ipaensis]		arahy.Tifrunner.gnm1.ann1.6H6W8R.2	690	S	octicosapeptide/phox/Bem1p domain kinase superfamily protein [Medicago truncatula]		arahy.Tifrunner.gnm1.ann1.BC87BJ.3	vacuolar amino acid transporter 1 [Arachis ipaensis]
arahy.Tifrunner.gnm1.ann1.H7PRHK.1	36	S	probable calcium-binding protein CML36 [Arachis ipaensis]		arahy.Tifrunner.gnm1.ann1.P6P7G9.1	583	S	DUF668 family protein [Medicago truncatula]		arahy.Tifrunner.gnm1.ann1.6H6W8R.2	1071	S	octicosapeptide/phox/Bem1p domain kinase superfamily protein [Medicago truncatula]		arahy.Tifrunner.gnm1.ann1.BCD3BN.1	zinc ion-binding protein [Medicago truncatula]
arahy.Tifrunner.gnm1.ann1.HMW6IE.2	151	S	serine/arginine-rich SC35-like splicing factor SCL33 [Arachis duranensis]		arahy.Tifrunner.gnm1.ann1.VW08M3.2	13	S	mechanosensitive ion channel protein 6-like [Arachis duranensis]		arahy.Tifrunner.gnm1.ann1.6I3V5I.1	444	S	formin-like protein 1 [Arachis duranensis]		arahy.Tifrunner.gnm1.ann1.BD57S3.1	GATA zinc finger domain-containing protein 10 [Ipomoea nil]
arahy.Tifrunner.gnm1.ann1.GHZW34.1	111	S	RmlC-like cupins superfamily protein [Medicago truncatula]		arahy.Tifrunner.gnm1.ann1.TQL4XD.2	15	S	auxin response factor 2-like [Arachis duranensis]		arahy.Tifrunner.gnm1.ann1.6I6CSY.1	81	S	"WEB family protein At3g02930, chloroplastic [Arachis duranensis]"		arahy.Tifrunner.gnm1.ann1.BD8AAL.1	"RING/FYVE/PHD zinc finger protein, putative [Medicago truncatula]"
arahy.Tifrunner.gnm1.ann1.649J27.1	259	S	epidermal growth factor receptor substrate 15-like 1 isoform X1 [Arachis ipaensis]		arahy.Tifrunner.gnm1.ann1.FKJ1CZ.1	137	S	serine/threonine-protein kinase SAPK3-like [Arachis ipaensis]		arahy.Tifrunner.gnm1.ann1.6IB1GK.1	150	S	NASP-related protein sim3 [Arachis ipaensis]		arahy.Tifrunner.gnm1.ann1.BE9V1M.1	L-lactate dehydrogenase A [Arachis duranensis]
arahy.Tifrunner.gnm1.ann1.PB8381.1	871	S	ABC transporter C family member 3-like [Arachis ipaensis]		arahy.Tifrunner.gnm1.ann1.50NPJN.1	387	S	auxilin-related protein 2-like [Arachis duranensis]		arahy.Tifrunner.gnm1.ann1.6JR7Q1	15	S	caltractin [Arachis ipaensis]		arahy.Tifrunner.gnm1.ann1.BEGE34.2	transmembrane protein [Arabidopsis thaliana]
arahy.Tifrunner.gnm1.ann1.0V2EN1.2	105	S	fimbrin-5-like [Arachis ipaensis]		arahy.Tifrunner.gnm1.ann1.JA3EPN.1	6	S	WD repeat-containing protein 48 isoform X2 [Arachis duranensis]		arahy.Tifrunner.gnm1.ann1.6JR7Q1	20	S	caltractin [Arachis ipaensis]		arahy.Tifrunner.gnm1.ann1.BEP26V.1	universal stress protein PHOS32-like [Lupinus angustifolius]
arahy.Tifrunner.gnm1.ann1.JLHH9C.1	101	S	respiratory burst oxidase homolog protein C [Arachis duranensis]		arahy.Tifrunner.gnm1.ann1.1Z9FJQ.2	121	S	protein N-lysine methyltransferase METTL21A [Arachis ipaensis]		arahy.Tifrunner.gnm1.ann1.6JS337.1	49	S	B-box zinc finger protein 18-like [Arachis duranensis]		arahy.Tifrunner.gnm1.ann1.BEZL7V.1	acyl-CoA thioesterase [Medicago truncatula]
arahy.Tifrunner.gnm1.ann1.VH5N8W.3	183	S	protein PLANT CADMIUM RESISTANCE 2-like [Arachis duranensis]		arahy.Tifrunner.gnm1.ann1.24PQDM.2	358	S	probable protein phosphatase 2C 22 [Arachis duranensis]		arahy.Tifrunner.gnm1.ann1.6K20QR.1	197	S	chaperone DnaJ-domain protein [Medicago truncatula]		arahy.Tifrunner.gnm1.ann1.BF36C3	CHD3-type chromatin-remodeling factor PICKLE [Arachis duranensis]
arahy.Tifrunner.gnm1.ann1.BP0NKM.2	28	S	phospholipase SGR2 [Arachis ipaensis]		arahy.Tifrunner.gnm1.ann1.1JKV8J.1	88	S	"triosephosphate isomerase, chloroplastic [Arachis duranensis]"		arahy.Tifrunner.gnm1.ann1.6KP4CV.1	10	S	calcium-dependent protein kinase 2-like [Arachis duranensis]		arahy.Tifrunner.gnm1.ann1.BFT67J.1	selenoprotein K [Arachis ipaensis]
arahy.Tifrunner.gnm1.ann1.KTSS0P.1	299	S	random slug protein 5-like [Arachis duranensis]		arahy.Tifrunner.gnm1.ann1.D032ER.1	344	S	histone-lysine N-methyltransferase ATXR3 [Arachis duranensis]		arahy.Tifrunner.gnm1.ann1.6KP4CV.1	28	S	calcium-dependent protein kinase 2-like [Arachis duranensis]		arahy.Tifrunner.gnm1.ann1.BFX481	putative proline-rich receptor-like protein kinase PERK11 isoform X2 [Juglans regia]
arahy.Tifrunner.gnm1.ann1.I2F35R.1	93	S	protein SODIUM POTASSIUM ROOT DEFECTIVE 2 [Cajanus cajan]		arahy.Tifrunner.gnm1.ann1.Y64AFY.2	232	S	pumilio homolog 2-like [Arachis ipaensis]		arahy.Tifrunner.gnm1.ann1.6KP4CV.1	85	S	calcium-dependent protein kinase 2-like [Arachis duranensis]		arahy.Tifrunner.gnm1.ann1.BGF2TK.1	"digalactosyldiacylglycerol synthase 1, chloroplastic [Arachis ipaensis]"
arahy.Tifrunner.gnm1.ann1.JHE8BQ.1	520	S	V-type proton ATPase subunit B 2 [Glycine max]		arahy.Tifrunner.gnm1.ann1.56X5WL.2	581	T	probable leucine-rich repeat receptor-like protein kinase At5g49770 isoform X1 [Arachis ipaensis]		arahy.Tifrunner.gnm1.ann1.6KU1RV.1	69	S	molybdenum cofactor sulfurase-like [Juglans regia]		arahy.Tifrunner.gnm1.ann1.BH8PB4.2	"protein VASCULAR ASSOCIATED DEATH 1, chloroplastic isoform X1 [Arachis ipaensis]"
arahy.Tifrunner.gnm1.ann1.UIUY7Y.1	80	S	E3 ubiquitin-protein ligase MARCH11-like isoform X2 [Arachis ipaensis]		arahy.Tifrunner.gnm1.ann1.L3RJRN.1	60	S	"succinate dehydrogenase [ubiquinone] iron-sulfur subunit 2, mitochondrial-like [Arachis ipaensis]"		arahy.Tifrunner.gnm1.ann1.6KU1RV.1	124	S	molybdenum cofactor sulfurase-like [Juglans regia]		arahy.Tifrunner.gnm1.ann1.BI1NU2	protein S-acyltransferase 8-like [Arachis ipaensis]
arahy.Tifrunner.gnm1.ann1.56Z8NU.1	39	S	"uridine kinase-like protein 2, chloroplastic [Arachis ipaensis]"		arahy.Tifrunner.gnm1.ann1.MBR1GC.1	69	S	CASP-like protein 4A3 [Arachis duranensis]		arahy.Tifrunner.gnm1.ann1.6L1LF5.1	204	S	FHA domain-containing protein FHA2 [Arachis duranensis]		arahy.Tifrunner.gnm1.ann1.BI9FA3.2	SWR1-complex protein 4-like [Arachis ipaensis]
arahy.Tifrunner.gnm1.ann1.V41UA4.2	955	S	"insulin-degrading enzyme-like 1, peroxisomal [Arachis ipaensis]"		arahy.Tifrunner.gnm1.ann1.ZKNE4R.1	202	S	protein TIME FOR COFFEE-like [Arachis duranensis]		arahy.Tifrunner.gnm1.ann1.6L1LF5.1	218	S	FHA domain-containing protein FHA2 [Arachis duranensis]		arahy.Tifrunner.gnm1.ann1.BIMS81	protein TRAUCO isoform X1 [Arachis duranensis]
arahy.Tifrunner.gnm1.ann1.D9BL0L.1	373	S			arahy.Tifrunner.gnm1.ann1.4L72G1.2	180	S	clathrin interactor EPSIN 1 [Arachis ipaensis]		arahy.Tifrunner.gnm1.ann1.6MS3W4.1	81	S	"2,3-bisphosphoglycerate-independent phosphoglycerate mutase [Arachis ipaensis]"		arahy.Tifrunner.gnm1.ann1.BJTL8K.1	"cyclops protein, putative [Medicago truncatula]"
arahy.Tifrunner.gnm1.ann1.WE50TT.1	88	S	probable receptor-like protein kinase At5g47070 [Arachis ipaensis]		arahy.Tifrunner.gnm1.ann1.632UCW.1	188	S	pheromone receptor-like protein [Medicago truncatula]		arahy.Tifrunner.gnm1.ann1.6NG7W1	180	S	protein WVD2-like 5 [Arachis ipaensis]		arahy.Tifrunner.gnm1.ann1.BKN5FL.1	probable 2-carboxy-D-arabinitol-1-phosphatase [Arachis duranensis]
arahy.Tifrunner.gnm1.ann1.S4A3WS.1	363	T	calmodulin-binding heat-shock protein [Medicago truncatula]		arahy.Tifrunner.gnm1.ann1.492HD2.1	217	S	DUF724 domain-containing protein 3 [Vigna angularis]		arahy.Tifrunner.gnm1.ann1.6NG7W1	372	S	protein WVD2-like 5 [Arachis ipaensis]		arahy.Tifrunner.gnm1.ann1.BMEB8K.1	protein QUIRKY-like [Arachis duranensis]
arahy.Tifrunner.gnm1.ann1.522STQ.1	159	T	BUD13 homolog [Arachis duranensis]		arahy.Tifrunner.gnm1.ann1.E1EB00.1	571	S	ENHANCER OF AG-4 protein 2 [Arachis duranensis]		arahy.Tifrunner.gnm1.ann1.6NG7W1	428	S	protein WVD2-like 5 [Arachis ipaensis]		arahy.Tifrunner.gnm1.ann1.BMML80.2	probable serine/threonine-protein kinase DDB_G0272282 isoform X3 [Arachis ipaensis]
arahy.Tifrunner.gnm1.ann1.QZG3GX.1	444	S	triadin [Arachis ipaensis]		arahy.Tifrunner.gnm1.ann1.ZV45BV.1	203	S	deSI-like protein At4g17486 [Arachis ipaensis]		arahy.Tifrunner.gnm1.ann1.6NN0Y3	55	S	ABSCISIC ACID-INSENSITIVE 5-like protein 7 [Arachis duranensis]		arahy.Tifrunner.gnm1.ann1.BMN4NJ.2	phosphoenolpyruvate carboxykinase [ATP] [Arachis duranensis]
arahy.Tifrunner.gnm1.ann1.UMW75A.1	373	S	monosaccharide-sensing protein 3-like [Arachis duranensis]		arahy.Tifrunner.gnm1.ann1.ZWJH5S.2	823	S	"dentin sialophosphoprotein-like protein, putative [Medicago truncatula]"		arahy.Tifrunner.gnm1.ann1.6NN0Y3	102	S	ABSCISIC ACID-INSENSITIVE 5-like protein 7 [Arachis duranensis]		arahy.Tifrunner.gnm1.ann1.BMQ6H2	spidroin-1 [Arachis ipaensis]
arahy.Tifrunner.gnm1.ann1.FTDV76.2	903	S	probable leucine-rich repeat receptor-like protein kinase At5g49770 [Arachis ipaensis]		arahy.Tifrunner.gnm1.ann1.2WY12S.1	628	S	lysM domain receptor-like kinase 4 [Arachis ipaensis]		arahy.Tifrunner.gnm1.ann1.6NN0Y3	329	S	ABSCISIC ACID-INSENSITIVE 5-like protein 7 [Arachis duranensis]		arahy.Tifrunner.gnm1.ann1.BN4BGX.1	muscle M-line assembly protein unc-89 isoform X1 [Arachis ipaensis]
arahy.Tifrunner.gnm1.ann1.F79NB3.1	133	T	AMP deaminase-like [Arachis ipaensis]		arahy.Tifrunner.gnm1.ann1.3UY4XW.1	515	S	E3 ubiquitin-protein ligase HEL2 [Arachis duranensis]		arahy.Tifrunner.gnm1.ann1.6PI0D0.1	820	S	receptor-like serine/threonine-protein kinase ALE2 [Arachis ipaensis]		arahy.Tifrunner.gnm1.ann1.BN59M2.3	"LOW QUALITY PROTEIN: monodehydroascorbate reductase 5, mitochondrial [Arachis duranensis]"
arahy.Tifrunner.gnm1.ann1.W152LR.1	37	S	probable ubiquitin-conjugating enzyme E2 C [Arachis duranensis]		arahy.Tifrunner.gnm1.ann1.KFQ7S3.4	938	S	LOW QUALITY PROTEIN: 125 kDa kinesin-related protein-like [Arachis duranensis]		arahy.Tifrunner.gnm1.ann1.6PI0D0.1	845	S	receptor-like serine/threonine-protein kinase ALE2 [Arachis ipaensis]		arahy.Tifrunner.gnm1.ann1.BN91FR.1	RNA-binding protein 1-like [Arachis ipaensis]
arahy.Tifrunner.gnm1.ann1.2L5X7N.3	729	S	cyclin-dependent kinase G-2 [Arachis ipaensis]		arahy.Tifrunner.gnm1.ann1.8T4WXA.3	151	S	high mobility group nucleosome-binding domain-containing protein 5-like [Arachis ipaensis]		arahy.Tifrunner.gnm1.ann1.6QFK0R.1	931	S	putative inactive cadmium/zinc-transporting ATPase HMA3 isoform X1 [Arachis ipaensis]		arahy.Tifrunner.gnm1.ann1.BP0NKM.2	phospholipase SGR2 [Arachis ipaensis]
arahy.Tifrunner.gnm1.ann1.SVA4CI.2	574	S	ethylene-insensitive protein 2-like [Arachis duranensis]		arahy.Tifrunner.gnm1.ann1.RXPE7Q.1	303	T	DUF21 domain-containing protein At4g14240-like [Arachis ipaensis]		arahy.Tifrunner.gnm1.ann1.6QNX53.1	588	S	trypsin family protein [Medicago truncatula]		arahy.Tifrunner.gnm1.ann1.BPJ3T6.2	"transmembrane protein, putative [Medicago truncatula]"
arahy.Tifrunner.gnm1.ann1.68WCMC.1	497	T	synaptotagmin-5 [Arachis ipaensis]		arahy.Tifrunner.gnm1.ann1.G6Z6LZ.2	1372	S	receptor-like serine/threonine-protein kinase ALE2 isoform X5 [Arachis ipaensis]		arahy.Tifrunner.gnm1.ann1.6R0DDZ.2	161	S	histone-lysine N-methyltransferase SUVR4 [Arachis ipaensis]		arahy.Tifrunner.gnm1.ann1.BQF9AX.1	phospholipid-transporting ATPase 1-like [Arachis ipaensis]
arahy.Tifrunner.gnm1.ann1.R82D2M.1	74	S	replication factor C subunit 2 [Arachis duranensis]		arahy.Tifrunner.gnm1.ann1.1JP5NC.1	216	S	far upstream element-binding protein 2-like [Arachis ipaensis]		arahy.Tifrunner.gnm1.ann1.6R0JB1	26	S	reticulon-like protein B9 [Arachis ipaensis]		arahy.Tifrunner.gnm1.ann1.BQYP51	protein SHOOT GRAVITROPISM 6 isoform X1 [Arachis ipaensis]
arahy.Tifrunner.gnm1.ann1.WXZ4D6.2	211	T	interactor of constitutive active ROPs protein [Arabidopsis thaliana]		arahy.Tifrunner.gnm1.ann1.Q6L7I5.3	154	S	RNA-binding protein 39 isoform X1 [Arachis duranensis]		arahy.Tifrunner.gnm1.ann1.6R22R1	115	S	Hop-interacting protein THI002 [Medicago truncatula]		arahy.Tifrunner.gnm1.ann1.BQZ9W1	serine/threonine-protein kinase mph1 isoform X1 [Arachis duranensis]
arahy.Tifrunner.gnm1.ann1.F3KKM7.1	916	S	serine/threonine-protein kinase Nek5-like [Arachis ipaensis]		arahy.Tifrunner.gnm1.ann1.549WES.1	107	S	protein tesmin/TSO1-like CXC 5 [Arachis ipaensis]		arahy.Tifrunner.gnm1.ann1.6R5024.1	7	S			arahy.Tifrunner.gnm1.ann1.BR8TWY.1	indole-3-acetic acid-induced protein ARG7 [Arachis ipaensis]
arahy.Tifrunner.gnm1.ann1.TJ3PHW.1	231	S	chalcone--flavonone isomerase 2 [Arachis ipaensis]		arahy.Tifrunner.gnm1.ann1.KUR4E8.1	61	S	proteasome subunit alpha type-4 [Arachis ipaensis]		arahy.Tifrunner.gnm1.ann1.6T0369.1	35	S	mRNA cap guanine-N7 methyltransferase 1-like [Arachis duranensis]		arahy.Tifrunner.gnm1.ann1.BR9EX8.5	Telomere repeat-binding protein 6 [Morus notabilis]
arahy.Tifrunner.gnm1.ann1.BEP26V.1	22	S	universal stress protein PHOS32-like [Lupinus angustifolius]		arahy.Tifrunner.gnm1.ann1.18T4MA.1	705	T	ubiquitin carboxyl-terminal hydrolase MINDY-2 isoform X2 [Cajanus cajan]		arahy.Tifrunner.gnm1.ann1.6TJY4I.2	318	S	"pumilio homolog 6, chloroplastic-like [Arachis duranensis]"		arahy.Tifrunner.gnm1.ann1.BT0S58.1	probable serine/threonine-protein kinase DDB_G0282963 isoform X1 [Arachis ipaensis]
arahy.Tifrunner.gnm1.ann1.YBNI57.1	386	S	ATPase subunit 1 (mitochondrion) [Lotus japonicus]		arahy.Tifrunner.gnm1.ann1.Y64AFY.2	412	S	pumilio homolog 2-like [Arachis ipaensis]		arahy.Tifrunner.gnm1.ann1.6TJY4I.2	614	S	"pumilio homolog 6, chloroplastic-like [Arachis duranensis]"		arahy.Tifrunner.gnm1.ann1.BURC06.1	"probable 6-phosphogluconolactonase 4, chloroplastic [Arachis ipaensis]"
arahy.Tifrunner.gnm1.ann1.XRB1FU.3	200	Y	shaggy-related protein kinase eta-like [Arachis ipaensis]		arahy.Tifrunner.gnm1.ann1.SLU9BZ.1	735	S	dentin sialophosphoprotein-like isoform X2 [Glycine max]		arahy.Tifrunner.gnm1.ann1.6TJY4I.2	632	S	"pumilio homolog 6, chloroplastic-like [Arachis duranensis]"		arahy.Tifrunner.gnm1.ann1.BVJT87.2	adaptin ear-binding coat-associated protein 2-like [Glycine max]
arahy.Tifrunner.gnm1.ann1.R550IY.1	340	T	NHL repeat protein [Medicago truncatula]		arahy.Tifrunner.gnm1.ann1.70K8N6.1	38	S	probable NAD(P)H dehydrogenase (quinone) FQR1-like 1 [Arachis duranensis]		arahy.Tifrunner.gnm1.ann1.6XT931	241	S	E3 ubiquitin-protein ligase RHF1A-like [Arachis duranensis]		arahy.Tifrunner.gnm1.ann1.BVM079.1	switch-associated protein 70 [Arachis duranensis]
arahy.Tifrunner.gnm1.ann1.ET71BL.1	255	S	clathrin interactor EPSIN 3-like isoform X1 [Arachis ipaensis]		arahy.Tifrunner.gnm1.ann1.YWUF76.1	1196	S	1-phosphatidylinositol-3-phosphate 5-kinase FAB1B-like [Arachis ipaensis]		arahy.Tifrunner.gnm1.ann1.6XZA8Y.1	350	S	U-box domain-containing protein 4 [Arachis ipaensis]		arahy.Tifrunner.gnm1.ann1.BW7R0I.3	probable cyclic nucleotide-gated ion channel 17 [Arachis ipaensis]
arahy.Tifrunner.gnm1.ann1.IQ8CLR.2	1310	S	protein TSS [Arachis duranensis]		arahy.Tifrunner.gnm1.ann1.RYYU2D.4	161	S	cellulose synthase A catalytic subunit 3 [UDP-forming] [Arachis duranensis]		arahy.Tifrunner.gnm1.ann1.6XZA8Y.1	360	S	U-box domain-containing protein 4 [Arachis ipaensis]		arahy.Tifrunner.gnm1.ann1.BWV8RN.1	growth-regulating factor 4-like [Arachis duranensis]
arahy.Tifrunner.gnm1.ann1.SRJ81T.2	433	S	IST1-like protein [Arachis duranensis]		arahy.Tifrunner.gnm1.ann1.FDUG2D.1	535	S	serine/threonine-protein phosphatase 6 regulatory ankyrin repeat subunit B-like [Cajanus cajan]		arahy.Tifrunner.gnm1.ann1.6XZA8Y.1	361	S	U-box domain-containing protein 4 [Arachis ipaensis]		arahy.Tifrunner.gnm1.ann1.BX7IV1	G-type lectin S-receptor-like serine/threonine-protein kinase At4g27290 isoform X2 [Arachis duranensis]
arahy.Tifrunner.gnm1.ann1.ET71BL.1	244	S	clathrin interactor EPSIN 3-like isoform X1 [Arachis ipaensis]		arahy.Tifrunner.gnm1.ann1.88CVAX.1	1117	T	topless-related protein 3 [Arachis duranensis]		arahy.Tifrunner.gnm1.ann1.6XZA8Y.1	377	S	U-box domain-containing protein 4 [Arachis ipaensis]		arahy.Tifrunner.gnm1.ann1.BX8PA5.1	probable aquaporin PIP-type 7a [Arachis ipaensis]
arahy.Tifrunner.gnm1.ann1.AC2PA2.1	271	S	zinc finger protein [Medicago truncatula]		arahy.Tifrunner.gnm1.ann1.IRA385.1	23	S	serine/threonine-protein kinase CDL1 isoform X1 [Arachis ipaensis]		arahy.Tifrunner.gnm1.ann1.6XZA8Y.1	426	S	U-box domain-containing protein 4 [Arachis ipaensis]		arahy.Tifrunner.gnm1.ann1.BXR415.2	zinc knuckle family protein [Populus trichocarpa]
arahy.Tifrunner.gnm1.ann1.8JFH4G.1	308	S	autophagy-related protein 18a [Arachis ipaensis]		arahy.Tifrunner.gnm1.ann1.CVJ130.1	112	T	"chlorophyll a-b binding protein CP29.2, chloroplastic-like [Arachis duranensis]"		arahy.Tifrunner.gnm1.ann1.6XZA8Y.1	484	S	U-box domain-containing protein 4 [Arachis ipaensis]		arahy.Tifrunner.gnm1.ann1.BYM2EW.1	"transmembrane protein, putative [Medicago truncatula]"
arahy.Tifrunner.gnm1.ann1.J4263J.1	128	S	mediator of RNA polymerase II transcription subunit 1-like isoform X1 [Arachis ipaensis]		arahy.Tifrunner.gnm1.ann1.MI9KMH.4	346	S	hydroxyproline-rich glycoprotein family protein [Medicago truncatula]		arahy.Tifrunner.gnm1.ann1.6XZA8Y.1	525	S	U-box domain-containing protein 4 [Arachis ipaensis]		arahy.Tifrunner.gnm1.ann1.C0C1T1	DUF1677 family protein [Medicago truncatula]
arahy.Tifrunner.gnm1.ann1.ZWJH5S.2	1501	S	"dentin sialophosphoprotein-like protein, putative [Medicago truncatula]"		arahy.Tifrunner.gnm1.ann1.2ZBI42.1	282	S	ABC transporter I family member 21 [Arachis ipaensis]		arahy.Tifrunner.gnm1.ann1.6Y71DM.2	315	S	probable inactive receptor kinase At5g58300 [Arachis ipaensis]		arahy.Tifrunner.gnm1.ann1.C0JSMI.1	GATA zinc finger domain-containing protein 10 [Ipomoea nil]
arahy.Tifrunner.gnm1.ann1.B3C57W.3	98	S	autophagy-related protein 13a-like isoform X2 [Arachis ipaensis]		arahy.Tifrunner.gnm1.ann1.SM0BS0.1	275	S	"zinc knuckle (CCHC-type) family protein, putative [Medicago truncatula]"		arahy.Tifrunner.gnm1.ann1.6Y8FH0.3	96	S	zinc finger CCCH domain-containing protein 64 [Arachis ipaensis]		arahy.Tifrunner.gnm1.ann1.C0K4N1	interactor of constitutive active ROPs 3 [Arachis ipaensis]
arahy.Tifrunner.gnm1.ann1.DB4GMR.1	52	S	allene oxide synthase-like [Arachis ipaensis]		arahy.Tifrunner.gnm1.ann1.F6CHDN.1	21	S	calcium-dependent protein kinase-like [Arachis ipaensis]		arahy.Tifrunner.gnm1.ann1.6YST69.1	502	S	"citrate synthase, glyoxysomal-like [Arachis ipaensis]"		arahy.Tifrunner.gnm1.ann1.C14L30.1	cellulose synthase A catalytic subunit 1 [UDP-forming]-like [Arachis ipaensis]
arahy.Tifrunner.gnm1.ann1.P6RGT7.1	194	S	type I inositol polyphosphate 5-phosphatase 2-like isoform X1 [Arachis duranensis]		arahy.Tifrunner.gnm1.ann1.9K340E.1	280	S	"putative methylesterase 12, chloroplastic isoform X1 [Arachis duranensis]"		arahy.Tifrunner.gnm1.ann1.70JD05.1	104	S	HMG-Y-related protein A-like [Arachis duranensis]		arahy.Tifrunner.gnm1.ann1.C1QR5S.2	metal tolerance protein C2 isoform X2 [Arachis ipaensis]
arahy.Tifrunner.gnm1.ann1.E1EB00.1	677	T	ENHANCER OF AG-4 protein 2 [Arachis duranensis]		arahy.Tifrunner.gnm1.ann1.FU2LG2.1	74	S	ASC1-like protein 1 [Arachis ipaensis]		arahy.Tifrunner.gnm1.ann1.70JD05.1	144	S	HMG-Y-related protein A-like [Arachis duranensis]		arahy.Tifrunner.gnm1.ann1.C2FWCT.1	autophagy-related protein 18f [Arachis duranensis]
arahy.Tifrunner.gnm1.ann1.2N4ZV5.1	15	S	"aspartate aminotransferase, mitochondrial [Arachis ipaensis]"		arahy.Tifrunner.gnm1.ann1.NA9FDR.1	4	S	transcription factor MYB98-like [Arachis ipaensis]		arahy.Tifrunner.gnm1.ann1.70JD05.1	147	S	HMG-Y-related protein A-like [Arachis duranensis]		arahy.Tifrunner.gnm1.ann1.C32TMJ.1	phospholipid-transporting ATPase 1-like [Arachis ipaensis]
arahy.Tifrunner.gnm1.ann1.8L2WFM.1	16	S			arahy.Tifrunner.gnm1.ann1.86F2TK.2	214	S	N-alpha-acetyltransferase 50 [Arachis ipaensis]		arahy.Tifrunner.gnm1.ann1.70K8N6.1	38	S	probable NAD(P)H dehydrogenase (quinone) FQR1-like 1 [Arachis duranensis]		arahy.Tifrunner.gnm1.ann1.C37FLM.1	ras-related protein RABB1c [Arachis ipaensis]
arahy.Tifrunner.gnm1.ann1.HE33X4.2	330	S	casein kinase I-like isoform X1 [Arachis ipaensis]		arahy.Tifrunner.gnm1.ann1.11BQ2X.4	231	S	serine/arginine-rich splicing factor RS31-like isoform X1 [Arachis ipaensis]		arahy.Tifrunner.gnm1.ann1.70YL0N.3	438	S	double-stranded RNA-binding protein 6-like isoform X8 [Arachis ipaensis]		arahy.Tifrunner.gnm1.ann1.C37ZT5.1	arginyl-tRNA--protein transferase 2-like [Arachis duranensis]
arahy.Tifrunner.gnm1.ann1.NV1NE1.2	506	S	"ruBisCO large subunit-binding protein subunit beta, chloroplastic [Arachis ipaensis]"		arahy.Tifrunner.gnm1.ann1.W27D8N.1	159	S	serine/threonine-protein kinase D6PKL1 [Arachis duranensis]		arahy.Tifrunner.gnm1.ann1.717FF7.1	18	S	codeine O-demethylase-like [Arachis duranensis]		arahy.Tifrunner.gnm1.ann1.C412JQ.3	ubiquitin-conjugating enzyme E2 32 [Arachis ipaensis]
arahy.Tifrunner.gnm1.ann1.Y5LKUA.1	127	S	probable ADP-ribosylation factor GTPase-activating protein AGD14 isoform X2 [Arachis duranensis]		arahy.Tifrunner.gnm1.ann1.T5Y2Y6.1	160	S	vesicle-associated protein 2-2-like [Arachis duranensis]		arahy.Tifrunner.gnm1.ann1.718LX1	680	S	G-type lectin S-receptor-like serine/threonine-protein kinase SD2-5 [Arachis ipaensis]		arahy.Tifrunner.gnm1.ann1.C42N01	zinc finger CCCH domain-containing protein 30 [Arachis ipaensis]
arahy.Tifrunner.gnm1.ann1.YK7683.1	745	S	agenet domain protein [Medicago truncatula]		arahy.Tifrunner.gnm1.ann1.SNA779.5	229	S	glycine-rich RNA-binding protein RZ1B isoform X1 [Arachis ipaensis]		arahy.Tifrunner.gnm1.ann1.71AIDN.2	20	S	splicing regulatory glutamine/lysine-rich protein 1 isoform X1 [Arachis ipaensis]		arahy.Tifrunner.gnm1.ann1.C46LV5.1	"transmembrane protein, putative [Medicago truncatula]"
arahy.Tifrunner.gnm1.ann1.SMM8KX.1	50	S	PLAC8 family protein [Medicago truncatula]		arahy.Tifrunner.gnm1.ann1.SFW5N9.1	32	S	"fructose-bisphosphate aldolase, cytoplasmic isozyme [Arachis duranensis]"		arahy.Tifrunner.gnm1.ann1.71AIDN.2	82	S	splicing regulatory glutamine/lysine-rich protein 1 isoform X1 [Arachis ipaensis]		arahy.Tifrunner.gnm1.ann1.C4VIY2	"P-loop nucleoside triphosphate hydrolase superfamily protein, putative [Medicago truncatula]"
arahy.Tifrunner.gnm1.ann1.IC01SW.1	806	S	pleiotropic drug resistance protein 1-like [Arachis duranensis]		arahy.Tifrunner.gnm1.ann1.5SR8FF.4	1026	S	E3 ubiquitin-protein ligase UPL3 isoform X3 [Arachis duranensis]		arahy.Tifrunner.gnm1.ann1.71AIDN.2	85	S	splicing regulatory glutamine/lysine-rich protein 1 isoform X1 [Arachis ipaensis]		arahy.Tifrunner.gnm1.ann1.C96M7R.2	UDP-glucuronic acid decarboxylase 5-like [Arachis ipaensis]
arahy.Tifrunner.gnm1.ann1.H0XM2A.1	6	T	helicase protein MOM1-like [Arachis ipaensis]		arahy.Tifrunner.gnm1.ann1.F3K4LC.2	59	S	transducin/WD40 repeat protein [Medicago truncatula]		arahy.Tifrunner.gnm1.ann1.71AIDN.2	96	S	splicing regulatory glutamine/lysine-rich protein 1 isoform X1 [Arachis ipaensis]		arahy.Tifrunner.gnm1.ann1.C9MEA2	nuclear pore complex protein NUP98A-like [Arachis ipaensis]
arahy.Tifrunner.gnm1.ann1.27GD0X.4	617	S	transcription initiation factor TFIID subunit 4b-like isoform X4 [Arachis ipaensis]		arahy.Tifrunner.gnm1.ann1.15IZES.1	157	S	myb-like protein H isoform X1 [Populus euphratica]		arahy.Tifrunner.gnm1.ann1.71AIDN.2	138	S	splicing regulatory glutamine/lysine-rich protein 1 isoform X1 [Arachis ipaensis]		arahy.Tifrunner.gnm1.ann1.CALT29.1	"ATP synthase subunit beta, mitochondrial [Arachis ipaensis]"
arahy.Tifrunner.gnm1.ann1.NP9PNT.2	123	S	feruloyl CoA ortho-hydroxylase 1 [Arachis ipaensis]		arahy.Tifrunner.gnm1.ann1.UU4P1L.1	979	T	phospholipase D delta [Arachis duranensis]		arahy.Tifrunner.gnm1.ann1.71AIDN.2	186	S	splicing regulatory glutamine/lysine-rich protein 1 isoform X1 [Arachis ipaensis]		arahy.Tifrunner.gnm1.ann1.CB00Z1	nucleolar and coiled-body phosphoprotein 1 isoform X1 [Arachis ipaensis]
arahy.Tifrunner.gnm1.ann1.18FPP0.1	397	S	meiosis chromosome segregation family protein [Medicago truncatula]		arahy.Tifrunner.gnm1.ann1.U2WZ8A.2	342	T	myosin-binding protein 7-like isoform X1 [Glycine max]		arahy.Tifrunner.gnm1.ann1.71J8LW.1	139	S	cation-chloride cotransporter 1 [Arachis ipaensis]		arahy.Tifrunner.gnm1.ann1.CB1PH2	sodium/calcium exchanger family protein / calcium-binding EF hand family protein [Arabidopsis thaliana]
arahy.Tifrunner.gnm1.ann1.KT4HPP.1	599	S	trafficking protein particle complex subunit 8 [Arachis ipaensis]		arahy.Tifrunner.gnm1.ann1.E7873Y.3	650	T	serine/arginine repetitive matrix protein 2 isoform X3 [Glycine max]		arahy.Tifrunner.gnm1.ann1.71VUPL.1	127	S	putative lactoylglutathione lyase [Arachis ipaensis]		arahy.Tifrunner.gnm1.ann1.CB4TML.1	CLIP-associated protein-like isoform X2 [Arachis ipaensis]
arahy.Tifrunner.gnm1.ann1.FH44NZ.1	1328	S	ABC transporter B family member 11-like [Arachis duranensis]		arahy.Tifrunner.gnm1.ann1.BN91FR.1	114	S	RNA-binding protein 1-like [Arachis ipaensis]		arahy.Tifrunner.gnm1.ann1.72DNA3.1	49	S	F-box protein SKIP8 [Arachis ipaensis]		arahy.Tifrunner.gnm1.ann1.CB7RQ1	plant UBX domain-containing protein 4-like [Arachis duranensis]
arahy.Tifrunner.gnm1.ann1.018Q39.2	375	S	protein STRUBBELIG-RECEPTOR FAMILY 3-like [Arachis ipaensis]		arahy.Tifrunner.gnm1.ann1.3HMZ7U.1	462	S	auxilin-related protein 2-like isoform X1 [Arachis ipaensis]		arahy.Tifrunner.gnm1.ann1.72FWH3.1	122	S	"protein indeterminate-domain 4, chloroplastic-like [Arachis ipaensis]"		arahy.Tifrunner.gnm1.ann1.CBM3F9.1	eukaryotic translation initiation factor 3 subunit B-like [Prunus mume]
arahy.Tifrunner.gnm1.ann1.KS7331.1	334	S	mitogen-activated protein kinase kinase kinase YODA-like [Arachis ipaensis]		arahy.Tifrunner.gnm1.ann1.XAI7HT.1	269	T	pumilio homolog 2-like [Arachis ipaensis]		arahy.Tifrunner.gnm1.ann1.72FWH3.1	196	S	"protein indeterminate-domain 4, chloroplastic-like [Arachis ipaensis]"		arahy.Tifrunner.gnm1.ann1.CC0JZ8.2	autophagy-related protein [Medicago truncatula]
arahy.Tifrunner.gnm1.ann1.L3EDXB.1	51	T	cytosolic endo-beta-N-acetylglucosaminidase 1-like [Arachis ipaensis]		arahy.Tifrunner.gnm1.ann1.VPDB1U.2	257	S	linoleate 9S-lipoxygenase 1-like [Arachis duranensis]		arahy.Tifrunner.gnm1.ann1.734U71	703	S	protein MEI2-like 4 isoform X1 [Arachis ipaensis]		arahy.Tifrunner.gnm1.ann1.CC2QW1	probable DNA double-strand break repair Rad50 ATPase [Arachis duranensis]
arahy.Tifrunner.gnm1.ann1.V0Z2W7.2	167	S	syntaxin-81 [Arachis ipaensis]		arahy.Tifrunner.gnm1.ann1.AB1T8P.3	117	S	transcription elongation factor TFIIS [Arachis ipaensis]		arahy.Tifrunner.gnm1.ann1.734U71	717	S	protein MEI2-like 4 isoform X1 [Arachis ipaensis]		arahy.Tifrunner.gnm1.ann1.CC4SXZ.2	protein MEI2-like 1 isoform X2 [Arachis duranensis]
arahy.Tifrunner.gnm1.ann1.56NXYI.1	309	S	probable serine incorporator [Arachis ipaensis]		arahy.Tifrunner.gnm1.ann1.CP70Z4.3	217	S	probable vacuolar amino acid transporter YPQ1 isoform X2 [Arachis ipaensis]		arahy.Tifrunner.gnm1.ann1.738LA1	12	S	transducin/WD40 repeat protein [Medicago truncatula]		arahy.Tifrunner.gnm1.ann1.CCQT9P.1	casein kinase I-like [Arachis ipaensis]
arahy.Tifrunner.gnm1.ann1.Y64AFY.2	619	S	pumilio homolog 2-like [Arachis ipaensis]		arahy.Tifrunner.gnm1.ann1.XN0C9H.1	135	S	histone-lysine N-methyltransferase SETD1A-like [Cajanus cajan]		arahy.Tifrunner.gnm1.ann1.738LA1	354	S	transducin/WD40 repeat protein [Medicago truncatula]		arahy.Tifrunner.gnm1.ann1.CDK8UN.1	1-aminocyclopropane-1-carboxylate oxidase homolog 1-like [Arachis duranensis]
arahy.Tifrunner.gnm1.ann1.HG7TPY.1	73	S	CASP-like protein 4A3 [Arachis duranensis]		arahy.Tifrunner.gnm1.ann1.PUBH8J.1	1402	S	Myb DNA-binding domain protein [Medicago truncatula]		arahy.Tifrunner.gnm1.ann1.73DRY2.1	522	S	CLIP-associated protein-like isoform X2 [Arachis ipaensis]		arahy.Tifrunner.gnm1.ann1.CE4N6Q.1	serine/threonine-protein kinase STE20-like isoform X1 [Arachis duranensis]
arahy.Tifrunner.gnm1.ann1.L9K6IL.1	55	S	DUF1685 family protein [Medicago truncatula]		arahy.Tifrunner.gnm1.ann1.GHL8IH.1	145	S	spermidine synthase [Arachis duranensis]		arahy.Tifrunner.gnm1.ann1.73LV1S.3	155	S	probable ADP-ribosylation factor GTPase-activating protein AGD14 [Arachis duranensis]		arahy.Tifrunner.gnm1.ann1.CEL6SJ.3	protein DENND6A [Arachis duranensis]
arahy.Tifrunner.gnm1.ann1.7X1Y1S.1	153	S	HMG-Y-related protein A-like [Arachis ipaensis]		arahy.Tifrunner.gnm1.ann1.ZBDE9H.5	717	S	transducin/WD40 repeat protein [Medicago truncatula]		arahy.Tifrunner.gnm1.ann1.73LV1S.3	176	S	probable ADP-ribosylation factor GTPase-activating protein AGD14 [Arachis duranensis]		arahy.Tifrunner.gnm1.ann1.CF5AFL.1	protein TSS [Arachis duranensis]
arahy.Tifrunner.gnm1.ann1.2R15UA.2	107	S	BZIP transcription factor [Medicago truncatula]		arahy.Tifrunner.gnm1.ann1.CQAX74.1	188	S	actin cross-linking protein [Medicago truncatula]		arahy.Tifrunner.gnm1.ann1.73LV1S.3	192	S	probable ADP-ribosylation factor GTPase-activating protein AGD14 [Arachis duranensis]		arahy.Tifrunner.gnm1.ann1.CFJ0K1	nitrile-specifier protein 5 [Arachis ipaensis]
arahy.Tifrunner.gnm1.ann1.2MP0U5.3	193	S	mitogen-activated protein kinase 9-like [Arachis duranensis]		arahy.Tifrunner.gnm1.ann1.XFQ1DZ.3	65	S	zinc finger CCCH domain-containing protein 13-like [Arachis duranensis]		arahy.Tifrunner.gnm1.ann1.73LV1S.3	210	S	probable ADP-ribosylation factor GTPase-activating protein AGD14 [Arachis duranensis]		arahy.Tifrunner.gnm1.ann1.CFVF1U.2	evolutionarily carboxy-terminal region protein [Medicago truncatula]
arahy.Tifrunner.gnm1.ann1.882I6B.1	142	T	40S ribosomal protein S15-4-like [Arachis duranensis]		arahy.Tifrunner.gnm1.ann1.CE4N6Q.1	134	S	serine/threonine-protein kinase STE20-like isoform X1 [Arachis duranensis]		arahy.Tifrunner.gnm1.ann1.73LV1S.3	220	S	probable ADP-ribosylation factor GTPase-activating protein AGD14 [Arachis duranensis]		arahy.Tifrunner.gnm1.ann1.CG0SM3	protein PNS1-like [Arachis ipaensis]
arahy.Tifrunner.gnm1.ann1.YG552F.3	139	S	ankyrin repeat and SAM domain-containing protein 6 [Arachis ipaensis]		arahy.Tifrunner.gnm1.ann1.C412JQ.3	259	T	ubiquitin-conjugating enzyme E2 32 [Arachis ipaensis]		arahy.Tifrunner.gnm1.ann1.73LV1S.3	231	S	probable ADP-ribosylation factor GTPase-activating protein AGD14 [Arachis duranensis]		arahy.Tifrunner.gnm1.ann1.CG4ML1	DUF724 domain-containing protein 3-like [Lupinus angustifolius]
arahy.Tifrunner.gnm1.ann1.LVE7NM.1	9	S	root phototropism protein 2-like [Arachis duranensis]		arahy.Tifrunner.gnm1.ann1.VX2J7C.1	85	S	VMA21-like domain protein [Medicago truncatula]		arahy.Tifrunner.gnm1.ann1.745V0L.1	91	S	mechanosensitive ion channel protein 10-like [Arachis ipaensis]		arahy.Tifrunner.gnm1.ann1.CH6KF4.1	probable protein phosphatase 2C 35 isoform X1 [Arachis ipaensis]
arahy.Tifrunner.gnm1.ann1.B5VTGG.2	63	S	splicing factor U2af large subunit B-like [Arachis ipaensis]		arahy.Tifrunner.gnm1.ann1.KDE77Y.4	225	T	pumilio homolog 2-like [Arachis ipaensis]		arahy.Tifrunner.gnm1.ann1.745V0L.1	99	S	mechanosensitive ion channel protein 10-like [Arachis ipaensis]		arahy.Tifrunner.gnm1.ann1.CHB2FZ.3	ABC transporter G family member 24-like isoform X1 [Arachis duranensis]
arahy.Tifrunner.gnm1.ann1.L75U5K.1	350	S	serpin-ZX [Arachis duranensis]		arahy.Tifrunner.gnm1.ann1.L7TZBM.1	762	S	RNA-binding (RRM/RBD/RNP motif) family protein [Medicago truncatula]		arahy.Tifrunner.gnm1.ann1.745V0L.1	125	S	mechanosensitive ion channel protein 10-like [Arachis ipaensis]		arahy.Tifrunner.gnm1.ann1.CHJC5X.1	mediator-associated protein 1 [Arachis duranensis]
arahy.Tifrunner.gnm1.ann1.U2NT3P.2	743	S	protein IQ-DOMAIN 31-like [Arachis ipaensis]		arahy.Tifrunner.gnm1.ann1.A1PMZW.1	918	S	bromodomain and WD repeat-containing protein 1-like [Arachis duranensis]		arahy.Tifrunner.gnm1.ann1.745V0L.1	171	S	mechanosensitive ion channel protein 10-like [Arachis ipaensis]		arahy.Tifrunner.gnm1.ann1.CHP91T.1	lipase [Medicago truncatula]
arahy.Tifrunner.gnm1.ann1.P32D72.1	332	S	GBF-interacting protein 1-like [Arachis ipaensis]		arahy.Tifrunner.gnm1.ann1.WWBH0C.1	48	S	SNF1-related protein kinase regulatory subunit beta-1 isoform X1 [Arachis ipaensis]		arahy.Tifrunner.gnm1.ann1.745V0L.1	185	S	mechanosensitive ion channel protein 10-like [Arachis ipaensis]		arahy.Tifrunner.gnm1.ann1.CHY071	E3 ubiquitin-protein ligase MARCH7-like isoform X1 [Glycine max]
arahy.Tifrunner.gnm1.ann1.023UF6.1	171	S	probable ADP-ribosylation factor GTPase-activating protein AGD6 [Arachis duranensis]		arahy.Tifrunner.gnm1.ann1.Z84XTW.1	497	T	synaptotagmin-5 [Arachis duranensis]		arahy.Tifrunner.gnm1.ann1.745V0L.1	188	S	mechanosensitive ion channel protein 10-like [Arachis ipaensis]		arahy.Tifrunner.gnm1.ann1.CI62AJ.2	E3 ubiquitin-protein ligase UPL1-like [Arachis duranensis]
arahy.Tifrunner.gnm1.ann1.1E00SW.2	159	S	polyadenylate-binding protein-interacting protein 7-like [Arachis ipaensis]		arahy.Tifrunner.gnm1.ann1.3B9L35.1	78	S	"transmembrane protein, putative [Medicago truncatula]"		arahy.Tifrunner.gnm1.ann1.76DKB4.1	132	S	translation initiation factor IF-2 [Arachis ipaensis]		arahy.Tifrunner.gnm1.ann1.CKL856.1	plant/F27B13-30 protein [Medicago truncatula]
arahy.Tifrunner.gnm1.ann1.IYM4LN.2	36	S	vacuolar cation/proton exchanger 3-like [Arachis ipaensis]		arahy.Tifrunner.gnm1.ann1.RT0S28.1	761	S	epidermal growth factor receptor substrate 15-like 1 isoform X1 [Arachis ipaensis]		arahy.Tifrunner.gnm1.ann1.76DKB4.1	176	S	translation initiation factor IF-2 [Arachis ipaensis]		arahy.Tifrunner.gnm1.ann1.CKNT4J.2	regulator of chromosome condensation (RCC1) family protein [Medicago truncatula]
arahy.Tifrunner.gnm1.ann1.JQ1SFF.1	434	S	CBL-interacting serine/threonine-protein kinase 23 isoform X2 [Arachis ipaensis]		arahy.Tifrunner.gnm1.ann1.UXYQ10.1	575	S	uridine-cytidine kinase C-like isoform X1 [Arachis ipaensis]		arahy.Tifrunner.gnm1.ann1.779YC2	118	S	"root border cell-specific protein, putative [Medicago truncatula]"		arahy.Tifrunner.gnm1.ann1.CL4QH0.1	ankyrin repeat protein [Arabidopsis thaliana]
arahy.Tifrunner.gnm1.ann1.H530GP.3	56	S	mitochondrial import receptor subunit TOM20-like [Arachis ipaensis]		arahy.Tifrunner.gnm1.ann1.U2NT3P.2	714	S	protein IQ-DOMAIN 31-like [Arachis ipaensis]		arahy.Tifrunner.gnm1.ann1.77LVUR.1	269	S	cytochrome P450 81E8-like [Arachis ipaensis]		arahy.Tifrunner.gnm1.ann1.CME6C7.1	protein phosphatase 2C 32 [Arachis duranensis]
arahy.Tifrunner.gnm1.ann1.FUW0JF.2	947	T	"LOW QUALITY PROTEIN: TMV resistance protein N-like, partial [Arachis duranensis]"		arahy.Tifrunner.gnm1.ann1.63GP52.1	18	T	"chlorophyll a-b binding protein CP29.3, chloroplastic [Arachis ipaensis]"		arahy.Tifrunner.gnm1.ann1.77LVUR.1	272	S	cytochrome P450 81E8-like [Arachis ipaensis]		arahy.Tifrunner.gnm1.ann1.CMZ6V1.1	VQ motif-containing protein 4 [Arachis duranensis]
arahy.Tifrunner.gnm1.ann1.470EJV.1	231	T	bZIP transcription factor 17 [Arachis ipaensis]		arahy.Tifrunner.gnm1.ann1.P32D72.1	172	S	GBF-interacting protein 1-like [Arachis ipaensis]		arahy.Tifrunner.gnm1.ann1.786IJ1	116	S			arahy.Tifrunner.gnm1.ann1.CNXW4V.1	TPR repeat-containing thioredoxin TTL1 [Arachis duranensis]
arahy.Tifrunner.gnm1.ann1.IVGW5G.1	220	S	transmembrane protein 245-like [Lupinus angustifolius]		arahy.Tifrunner.gnm1.ann1.FIF49B.2	145	T	protein JASON-like isoform X1 [Arachis ipaensis]		arahy.Tifrunner.gnm1.ann1.790TY1	801	S	probable LRR receptor-like serine/threonine-protein kinase At1g06840 [Arachis ipaensis]		arahy.Tifrunner.gnm1.ann1.CP2NGN.1	serine/threonine-protein kinase SRK2E [Arachis duranensis]
arahy.Tifrunner.gnm1.ann1.JX8F6E.1	147	S	putative protein TPRXL [Arachis duranensis]		arahy.Tifrunner.gnm1.ann1.X0ULI9.1	129	S	serine/threonine-protein kinase D6PKL2-like [Arachis duranensis]		arahy.Tifrunner.gnm1.ann1.790TY1	852	S	probable LRR receptor-like serine/threonine-protein kinase At1g06840 [Arachis ipaensis]		arahy.Tifrunner.gnm1.ann1.CP6VIJ.1	E3 ubiquitin-protein ligase RGLG2 [Arachis ipaensis]
arahy.Tifrunner.gnm1.ann1.HW9H1V.1	346	S	transcriptional corepressor LEUNIG_HOMOLOG isoform X2 [Arachis ipaensis]		arahy.Tifrunner.gnm1.ann1.JNS4CJ.2	16	S	cellulose synthase-like protein D3 [Arachis duranensis]		arahy.Tifrunner.gnm1.ann1.790TY1	857	S	probable LRR receptor-like serine/threonine-protein kinase At1g06840 [Arachis ipaensis]		arahy.Tifrunner.gnm1.ann1.CP70Z4.3	probable vacuolar amino acid transporter YPQ1 isoform X2 [Arachis ipaensis]
arahy.Tifrunner.gnm1.ann1.4HQ694.2	133	S	vesicle transport protein SEC20 [Arachis ipaensis]		arahy.Tifrunner.gnm1.ann1.IGC1S7.3	478	S	5'-3' exoribonuclease 3 isoform X2 [Arachis duranensis]		arahy.Tifrunner.gnm1.ann1.790TY1	863	S	probable LRR receptor-like serine/threonine-protein kinase At1g06840 [Arachis ipaensis]		arahy.Tifrunner.gnm1.ann1.CP8NP2	putative transporter arsB [Arachis ipaensis]
arahy.Tifrunner.gnm1.ann1.TP5H97.1	16	S	ecotropic viral integration site 5 protein homolog [Arachis ipaensis]		arahy.Tifrunner.gnm1.ann1.H8Y7P7.2	317	S	serine/arginine-rich splicing factor 4-like [Arachis duranensis]		arahy.Tifrunner.gnm1.ann1.790TY1	866	S	probable LRR receptor-like serine/threonine-protein kinase At1g06840 [Arachis ipaensis]		arahy.Tifrunner.gnm1.ann1.CPIQ3I.1	actin cytoskeleton-regulatory complex protein PAN1 [Arachis duranensis]
arahy.Tifrunner.gnm1.ann1.SJ3TM1.1	13	S	UMP-CMP kinase 3-like [Arachis duranensis]		arahy.Tifrunner.gnm1.ann1.Y0NS3Z.3	156	S	transmembrane protein 18-like isoform X1 [Arachis duranensis]		arahy.Tifrunner.gnm1.ann1.790TY1	867	S	probable LRR receptor-like serine/threonine-protein kinase At1g06840 [Arachis ipaensis]		arahy.Tifrunner.gnm1.ann1.CQAX74.1	actin cross-linking protein [Medicago truncatula]
arahy.Tifrunner.gnm1.ann1.J1PMCL.1	165	S	E3 ubiquitin-protein ligase At1g12760-like [Arachis ipaensis]		arahy.Tifrunner.gnm1.ann1.U5RNGH.1	160	S	B3 domain-containing protein REM16-like [Arachis duranensis]		arahy.Tifrunner.gnm1.ann1.794712	30	S	WRKY transcription factor 1-like isoform X1 [Arachis ipaensis]		arahy.Tifrunner.gnm1.ann1.CRK2RL.1	serine/threonine protein phosphatase 2A regulatory subunit B''beta-like isoform X2 [Arachis duranensis]
arahy.Tifrunner.gnm1.ann1.QXM1B7.1	39	T	chlorophyll a-b binding protein of LHCII type 1-like [Arachis ipaensis]		arahy.Tifrunner.gnm1.ann1.J2ZA2N.1	413	S	casein kinase I-like [Arachis duranensis]		arahy.Tifrunner.gnm1.ann1.794712	33	S	WRKY transcription factor 1-like isoform X1 [Arachis ipaensis]		arahy.Tifrunner.gnm1.ann1.CS9TBZ.1	probable NAD(P)H dehydrogenase (quinone) FQR1-like 2 [Arachis duranensis]
arahy.Tifrunner.gnm1.ann1.T43K8I.3	803	T	serine/threonine-protein phosphatase BSL1 [Arachis ipaensis]		arahy.Tifrunner.gnm1.ann1.X88BGH.1	7	S	"outer envelope pore protein 16, chloroplastic isoform X2 [Arachis ipaensis]"		arahy.Tifrunner.gnm1.ann1.794712	96	S	WRKY transcription factor 1-like isoform X1 [Arachis ipaensis]		arahy.Tifrunner.gnm1.ann1.CT2MP1	protein BRASSINAZOLE-RESISTANT 1 [Arachis ipaensis]
arahy.Tifrunner.gnm1.ann1.RHY2RN.1	110	S	AT-hook motif nuclear-localized protein 14 [Arachis ipaensis]		arahy.Tifrunner.gnm1.ann1.YXX8CM.1	202	S	proline-rich cell wall-like protein [Medicago truncatula]		arahy.Tifrunner.gnm1.ann1.794712	114	S	WRKY transcription factor 1-like isoform X1 [Arachis ipaensis]		arahy.Tifrunner.gnm1.ann1.CT84XJ.4	Glutamate decarboxylase 1 [Morus notabilis]
arahy.Tifrunner.gnm1.ann1.L78ELK.2	476	T	epidermal growth factor receptor substrate 15 [Arachis duranensis]		arahy.Tifrunner.gnm1.ann1.Z6JTIR.1	317	S	protein IQ-DOMAIN 14-like [Arachis ipaensis]		arahy.Tifrunner.gnm1.ann1.79GVE2.1	566	S	probable LRR receptor-like serine/threonine-protein kinase At1g06840 [Arachis duranensis]		arahy.Tifrunner.gnm1.ann1.CU2P0Q.2	G2/mitotic-specific cyclin S13-7 [Arachis duranensis]
arahy.Tifrunner.gnm1.ann1.AI2V23.1	28	S			arahy.Tifrunner.gnm1.ann1.YYB4W1.1	408	S			arahy.Tifrunner.gnm1.ann1.79RC6W.2	48	S	LOW QUALITY PROTEIN: protein NAP1-like [Cajanus cajan]		arahy.Tifrunner.gnm1.ann1.CV534K.1	BTB/POZ domain-containing protein At3g44820-like isoform X1 [Arachis ipaensis]
arahy.Tifrunner.gnm1.ann1.S25UJZ.1	15	S	probable WRKY transcription factor 15 [Arachis duranensis]		arahy.Tifrunner.gnm1.ann1.CT84XJ.4	8	S	Glutamate decarboxylase 1 [Morus notabilis]		arahy.Tifrunner.gnm1.ann1.79RC6W.2	51	S	LOW QUALITY PROTEIN: protein NAP1-like [Cajanus cajan]		arahy.Tifrunner.gnm1.ann1.CV6J43.1	MLO-like protein 6 [Arachis duranensis]
arahy.Tifrunner.gnm1.ann1.KSGU3T.1	174	S	trihelix transcription factor GT-4-like [Arachis ipaensis]		arahy.Tifrunner.gnm1.ann1.5V3X3X.2	286	T	LOW QUALITY PROTEIN: topless-related protein 4-like [Arachis ipaensis]		arahy.Tifrunner.gnm1.ann1.79RC6W.2	1459	S	LOW QUALITY PROTEIN: protein NAP1-like [Cajanus cajan]		arahy.Tifrunner.gnm1.ann1.CVJ130.1	"chlorophyll a-b binding protein CP29.2, chloroplastic-like [Arachis duranensis]"
arahy.Tifrunner.gnm1.ann1.Y9A7HY.1	269	S	stress response protein NST1 isoform X2 [Sesamum indicum]		arahy.Tifrunner.gnm1.ann1.FX07CR.1	308	S	serine hydroxymethyltransferase 4 [Arachis ipaensis]		arahy.Tifrunner.gnm1.ann1.79RC6W.2	1469	S	LOW QUALITY PROTEIN: protein NAP1-like [Cajanus cajan]		arahy.Tifrunner.gnm1.ann1.CWT1SW.1	cotton fiber [Medicago truncatula]
arahy.Tifrunner.gnm1.ann1.JSL8JQ.1	834	T	protein NLP4-like [Arachis ipaensis]		arahy.Tifrunner.gnm1.ann1.6GE0SS.1	75	S	phytochrome E-like isoform X2 [Arachis ipaensis]		arahy.Tifrunner.gnm1.ann1.79RH61	283	S	RHOMBOID-like protein 1 [Arachis ipaensis]		arahy.Tifrunner.gnm1.ann1.CX54H1	protein translation factor SUI1 homolog 1 [Arachis ipaensis]
arahy.Tifrunner.gnm1.ann1.0QZG7W.1	781	S	SPOC domain protein [Medicago truncatula]		arahy.Tifrunner.gnm1.ann1.ZQ0E46.1	218	S	SNAP25 homologous protein SNAP33-like [Arachis duranensis]		arahy.Tifrunner.gnm1.ann1.79SPSS.1	861	S	protein tesmin/TSO1-like CXC 2 [Arachis ipaensis]		arahy.Tifrunner.gnm1.ann1.CXZ5TN.1	maternal effect embryo arrest protein [Medicago truncatula]
arahy.Tifrunner.gnm1.ann1.Q9RGLK.1	269	S	U1 small nuclear ribonucleoprotein 70 kDa-like [Cajanus cajan]		arahy.Tifrunner.gnm1.ann1.LND7SA.1	39	S	pleiotropic drug resistance protein 2 [Arachis duranensis]		arahy.Tifrunner.gnm1.ann1.79UAYX.1	111	S	transcription factor [Medicago truncatula]		arahy.Tifrunner.gnm1.ann1.CY1TA1	auxin-responsive protein IAA9-like [Arachis ipaensis]
arahy.Tifrunner.gnm1.ann1.KEU88K.2	318	S	putative clathrin assembly protein At5g35200 [Arachis ipaensis]		arahy.Tifrunner.gnm1.ann1.JYM9I0.1	1155	S	filaggrin [Arachis ipaensis]		arahy.Tifrunner.gnm1.ann1.7AZW9Z.2	143	S	"50S ribosomal protein L1, chloroplastic isoform X2 [Arachis ipaensis]"		arahy.Tifrunner.gnm1.ann1.CYZ0T8.1	formin-like protein 1 [Arachis duranensis]
arahy.Tifrunner.gnm1.ann1.L7TZBM.1	338	S	RNA-binding (RRM/RBD/RNP motif) family protein [Medicago truncatula]		arahy.Tifrunner.gnm1.ann1.N38075.1	361	S	"putative 3,4-dihydroxy-2-butanone kinase isoform X1 [Arachis duranensis]"		arahy.Tifrunner.gnm1.ann1.7B5I5W.1	357	S	U-box domain-containing protein 3 isoform X1 [Arachis ipaensis]		arahy.Tifrunner.gnm1.ann1.CZ3U71	"probable serine/threonine-protein kinase Cx32, chloroplastic [Arachis ipaensis]"
arahy.Tifrunner.gnm1.ann1.E5AZB0.1	702	S	5-methyltetrahydropteroyltriglutamate--homocysteine methyltransferase 2 [Arachis ipaensis]		arahy.Tifrunner.gnm1.ann1.EMJ2JU.1	47	S	"chlorophyll a-b binding protein 215, chloroplastic [Arachis ipaensis]"		arahy.Tifrunner.gnm1.ann1.7B7L43	208	S	evolutionarily carboxy-terminal region protein [Medicago truncatula]		arahy.Tifrunner.gnm1.ann1.CZ6M1X.1	plant/F18B13-26 protein [Medicago truncatula]
arahy.Tifrunner.gnm1.ann1.8R27D6.1	232	S	cell division cycle and apoptosis regulator protein 1 [Arachis duranensis]		arahy.Tifrunner.gnm1.ann1.Q4JBZ8.1	208	S	sulfite exporter TauE/SafE family protein [Medicago truncatula]		arahy.Tifrunner.gnm1.ann1.7B7L43	631	S	evolutionarily carboxy-terminal region protein [Medicago truncatula]		arahy.Tifrunner.gnm1.ann1.CZE161.1	immunoglobulin A1 protease autotransporter isoform X1 [Arachis ipaensis]
arahy.Tifrunner.gnm1.ann1.44QEU2.1	391	S	sodium/calcium exchanger family protein / calcium-binding EF hand family protein [Arabidopsis thaliana]		arahy.Tifrunner.gnm1.ann1.WGP01G.2	89	S	microtubule-associated protein futsch-like isoform X2 [Gossypium hirsutum]		arahy.Tifrunner.gnm1.ann1.7C35U2	15	S	exosome complex component RRP41-like [Arachis ipaensis]		arahy.Tifrunner.gnm1.ann1.D032ER.1	histone-lysine N-methyltransferase ATXR3 [Arachis duranensis]
arahy.Tifrunner.gnm1.ann1.M63M99.2	649	S	ABC transporter B family member 11-like [Arachis duranensis]		arahy.Tifrunner.gnm1.ann1.TD0XCK.1	356	S	probable inactive receptor kinase At5g58300 [Arachis duranensis]		arahy.Tifrunner.gnm1.ann1.7CP983	354	S	"zinc knuckle (CCHC-type) family protein, putative [Medicago truncatula]"		arahy.Tifrunner.gnm1.ann1.D04CB1	TBC1 domain family member 22B-like [Arachis ipaensis]
arahy.Tifrunner.gnm1.ann1.NS4EV3.1	514	S	"protein indeterminate-domain 4, chloroplastic-like [Arachis ipaensis]"		arahy.Tifrunner.gnm1.ann1.A6P7Y5.2	194	T	uncharacterized transporter YBR287W-like [Arachis ipaensis]		arahy.Tifrunner.gnm1.ann1.7CTW4M.1	52	S	protein IQ-DOMAIN 32 [Arachis ipaensis]		arahy.Tifrunner.gnm1.ann1.D0K4TI.1	protein WVD2-like 1 [Arachis duranensis]
arahy.Tifrunner.gnm1.ann1.6NN0YE.3	329	S	ABSCISIC ACID-INSENSITIVE 5-like protein 7 [Arachis duranensis]		arahy.Tifrunner.gnm1.ann1.LC98AP.2	11	S	sucrose synthase [Arachis duranensis]		arahy.Tifrunner.gnm1.ann1.7CTW4M.1	324	S	protein IQ-DOMAIN 32 [Arachis ipaensis]		arahy.Tifrunner.gnm1.ann1.D0Q561.2	TOM1-like protein 2 [Arachis duranensis]
arahy.Tifrunner.gnm1.ann1.ECYT9B.1	133	S	"28 kDa ribonucleoprotein, chloroplastic isoform X1 [Arachis duranensis]"		arahy.Tifrunner.gnm1.ann1.CU2P0Q.2	157	S	G2/mitotic-specific cyclin S13-7 [Arachis duranensis]		arahy.Tifrunner.gnm1.ann1.7CTW4M.1	332	S	protein IQ-DOMAIN 32 [Arachis ipaensis]		arahy.Tifrunner.gnm1.ann1.D0RQ01	probable L-type lectin-domain containing receptor kinase S.5 [Arachis duranensis]
arahy.Tifrunner.gnm1.ann1.U12L5E.1	21	S	increased DNA methylation 1 [Cicer arietinum]		arahy.Tifrunner.gnm1.ann1.TI9N5S.1	56	S	BSD domain-containing family protein [Populus trichocarpa]		arahy.Tifrunner.gnm1.ann1.7CTW4M.1	632	S	protein IQ-DOMAIN 32 [Arachis ipaensis]		arahy.Tifrunner.gnm1.ann1.D0V14N.1	plant UBX domain-containing protein 10-like [Arachis duranensis]
arahy.Tifrunner.gnm1.ann1.FBBL0Z.1	96	S	protein MODIFIER OF SNC1 1 isoform X1 [Arachis duranensis]		arahy.Tifrunner.gnm1.ann1.GB2ICR.2	25	T	lysine histidine transporter-like 8 [Arachis duranensis]		arahy.Tifrunner.gnm1.ann1.7E86K1	220	S	metabotropic glutamate receptor-like protein P [Cicer arietinum]		arahy.Tifrunner.gnm1.ann1.D0WQQS.1	aquaporin TIP1-1-like [Cajanus cajan]
arahy.Tifrunner.gnm1.ann1.632UCW.1	341	S	pheromone receptor-like protein [Medicago truncatula]		arahy.Tifrunner.gnm1.ann1.ESW5NE.2	610	T	protein MEI2-like 1 isoform X2 [Arachis duranensis]		arahy.Tifrunner.gnm1.ann1.7F0WTK.1	853	S	COP1-interacting-like protein [Medicago truncatula]		arahy.Tifrunner.gnm1.ann1.D12313	regulatory-associated protein of TOR 1-like [Arachis duranensis]
arahy.Tifrunner.gnm1.ann1.FAC3HW.1	488	S	eukaryotic translation initiation factor 4B2-like [Arachis duranensis]		arahy.Tifrunner.gnm1.ann1.NCQ92W.1	859	S	protein WEAK CHLOROPLAST MOVEMENT UNDER BLUE LIGHT 1-like [Arachis duranensis]		arahy.Tifrunner.gnm1.ann1.7F0WTK.1	871	S	COP1-interacting-like protein [Medicago truncatula]		arahy.Tifrunner.gnm1.ann1.D15RR9.1	transcription factor TCP4-like [Arachis duranensis]
arahy.Tifrunner.gnm1.ann1.76DKB4.1	176	S	translation initiation factor IF-2 [Arachis ipaensis]		arahy.Tifrunner.gnm1.ann1.FSAK9D.1	22	S	"allene oxide cyclase 3, chloroplastic-like isoform X1 [Arachis duranensis]"		arahy.Tifrunner.gnm1.ann1.7F0WTK.1	913	S	COP1-interacting-like protein [Medicago truncatula]		arahy.Tifrunner.gnm1.ann1.D1K6PT.1	formin-like protein 5 [Arachis ipaensis]
arahy.Tifrunner.gnm1.ann1.CC4SXZ.2	610	T	protein MEI2-like 1 isoform X2 [Arachis duranensis]		arahy.Tifrunner.gnm1.ann1.7FJL8T.2	87	S	splicing factor U2af large subunit A-like isoform X2 [Vigna radiata var. radiata]		arahy.Tifrunner.gnm1.ann1.7F0WTK.1	1038	S	COP1-interacting-like protein [Medicago truncatula]		arahy.Tifrunner.gnm1.ann1.D1NSDN.1	"succinate-semialdehyde dehydrogenase, mitochondrial [Arachis duranensis]"
arahy.Tifrunner.gnm1.ann1.SAS3Z5.2	146	S	zinc finger CCCH domain-containing protein 55 [Arachis ipaensis]		arahy.Tifrunner.gnm1.ann1.J2ZA2N.1	392	S	casein kinase I-like [Arachis duranensis]		arahy.Tifrunner.gnm1.ann1.7F0WTK.1	1159	S	COP1-interacting-like protein [Medicago truncatula]		arahy.Tifrunner.gnm1.ann1.D1PG31.1	phytolongin Phyl2.2 [Arachis duranensis]
arahy.Tifrunner.gnm1.ann1.KDE77Y.4	302	T	pumilio homolog 2-like [Arachis ipaensis]		arahy.Tifrunner.gnm1.ann1.GJS7Q8.1	25	S	dnaJ protein homolog [Arachis ipaensis]		arahy.Tifrunner.gnm1.ann1.7F0ZFP.2	857	S	dentin sialophosphoprotein [Arachis duranensis]		arahy.Tifrunner.gnm1.ann1.D1PGN1	NAD(P)-binding rossmann-fold protein [Medicago truncatula]
arahy.Tifrunner.gnm1.ann1.B6N7K9.1	278	S	meiosis chromosome segregation family protein [Medicago truncatula]		arahy.Tifrunner.gnm1.ann1.G9KXLY.2	419	S	serine/threonine-protein kinase At5g01020-like [Arachis ipaensis]		arahy.Tifrunner.gnm1.ann1.7F1JQP.1	10	S	ABA-responsive protein ABR17-like [Arachis ipaensis]		arahy.Tifrunner.gnm1.ann1.D1R704.1	LIM domain-containing protein WLIM2b-like [Arachis ipaensis]
arahy.Tifrunner.gnm1.ann1.5C4SPF.4	305	S	tetratricopeptide repeat protein 4 homolog [Arachis ipaensis]		arahy.Tifrunner.gnm1.ann1.AD012R.1	50	T	protein NRT1/ PTR FAMILY 6.1 [Arachis ipaensis]		arahy.Tifrunner.gnm1.ann1.7F1JQP.1	152	S	ABA-responsive protein ABR17-like [Arachis ipaensis]		arahy.Tifrunner.gnm1.ann1.D2ALS7.1	serine/threonine-protein kinase HT1-like [Arachis ipaensis]
arahy.Tifrunner.gnm1.ann1.ZE8HJS.1	53	S	RNA-binding protein 8A-B [Arachis ipaensis]		arahy.Tifrunner.gnm1.ann1.173QHH.1	48	S	1-aminocyclopropane-1-carboxylate oxidase homolog 1-like [Arachis ipaensis]		arahy.Tifrunner.gnm1.ann1.7F80QJ.1	671	S	"endo-1,4-beta-xylanase A-like [Arachis ipaensis]"		arahy.Tifrunner.gnm1.ann1.D2DMX1	"glyceraldehyde-3-phosphate dehydrogenase A, chloroplastic [Arachis ipaensis]"
arahy.Tifrunner.gnm1.ann1.T5NBQ0.2	144	S	probable protein phosphatase 2C 4 [Arachis ipaensis]		arahy.Tifrunner.gnm1.ann1.4L72G1.2	178	S	clathrin interactor EPSIN 1 [Arachis ipaensis]		arahy.Tifrunner.gnm1.ann1.7FJL8T.2	29	S	splicing factor U2af large subunit A-like isoform X2 [Vigna radiata var. radiata]		arahy.Tifrunner.gnm1.ann1.D2QIY2	sorting nexin carboxy-terminal protein [Medicago truncatula]
arahy.Tifrunner.gnm1.ann1.ZNJT9X.1	37	T	group 1 family glycosyltransferase [Medicago truncatula]		arahy.Tifrunner.gnm1.ann1.L76SLB.1	221	S	auxin efflux carrier component 1 [Arachis duranensis]		arahy.Tifrunner.gnm1.ann1.7FJL8T.2	49	S	splicing factor U2af large subunit A-like isoform X2 [Vigna radiata var. radiata]		arahy.Tifrunner.gnm1.ann1.D38J11.2	E3 ubiquitin-protein ligase RGLG1-like [Arachis ipaensis]
arahy.Tifrunner.gnm1.ann1.QC4JPF.1	4	S			arahy.Tifrunner.gnm1.ann1.3X6E38.1	20	S	F-box family protein [Populus trichocarpa]		arahy.Tifrunner.gnm1.ann1.7FJL8T.2	87	S	splicing factor U2af large subunit A-like isoform X2 [Vigna radiata var. radiata]		arahy.Tifrunner.gnm1.ann1.D3EF7U.2	serine/threonine protein phosphatase 2A 55 kDa regulatory subunit B beta isoform-like isoform X2 [Arachis duranensis]
arahy.Tifrunner.gnm1.ann1.84FHQN.1	978	S	epidermal growth factor receptor substrate 15-like 1 isoform X1 [Arachis duranensis]		arahy.Tifrunner.gnm1.ann1.3KSC2Z.1	369	S	protein ABHD17B-like [Arachis ipaensis]		arahy.Tifrunner.gnm1.ann1.7FUZ0V.2	476	S	probable serine/threonine-protein kinase WNK3 isoform X2 [Arachis duranensis]		arahy.Tifrunner.gnm1.ann1.D3G282	stem-specific protein TSJT1-like [Arachis duranensis]
arahy.Tifrunner.gnm1.ann1.NY6I93.1	314	S	UDP-galactose transporter 1 [Arachis ipaensis]		arahy.Tifrunner.gnm1.ann1.67PT2S.1	184	S	trihelix transcription factor ASIL1-like [Arachis duranensis]		arahy.Tifrunner.gnm1.ann1.7G0Y3W.1	303	S	probable leucine-rich repeat receptor-like protein kinase At1g68400 [Arachis duranensis]		arahy.Tifrunner.gnm1.ann1.D42UYZ.2	nodulin-related protein 1-like [Cajanus cajan]
arahy.Tifrunner.gnm1.ann1.RHD4AQ.1	63	S	"transmembrane protein, putative [Medicago truncatula]"		arahy.Tifrunner.gnm1.ann1.8ZRR6W.1	222	S	regulator of Vps4 activity in the MVB pathway protein [Medicago truncatula]		arahy.Tifrunner.gnm1.ann1.7HV2PX.1	298	S	F-actin-capping protein subunit alpha isoform X2 [Arachis ipaensis]		arahy.Tifrunner.gnm1.ann1.D47N05.1	alpha carbonic anhydrase 8 [Arachis ipaensis]
arahy.Tifrunner.gnm1.ann1.51INSQ.1	145	S	BSD domain-containing protein 1 [Arachis ipaensis]		arahy.Tifrunner.gnm1.ann1.ZE7QP6.1	312	T	protein IQ-DOMAIN 14 isoform X1 [Arachis duranensis]		arahy.Tifrunner.gnm1.ann1.7J7UQ4.2	12	S	probable alkaline/neutral invertase D [Arachis duranensis]		arahy.Tifrunner.gnm1.ann1.D5HFJ9.3	myeloid leukemia factor 1-like [Arachis ipaensis]
arahy.Tifrunner.gnm1.ann1.73LV1S.3	176	S	probable ADP-ribosylation factor GTPase-activating protein AGD14 [Arachis duranensis]		arahy.Tifrunner.gnm1.ann1.V6C9BH.1	1184	S	GYF domain protein [Medicago truncatula]		arahy.Tifrunner.gnm1.ann1.7J7UQ4.2	45	S	probable alkaline/neutral invertase D [Arachis duranensis]		arahy.Tifrunner.gnm1.ann1.D615WN.1	transcription factor MYC4-like [Arachis duranensis]
arahy.Tifrunner.gnm1.ann1.62AJ6F.1	834	S	protein NLP6-like isoform X1 [Arachis ipaensis]		arahy.Tifrunner.gnm1.ann1.U6FHN5.1	223	T	stem-specific protein TSJT1-like [Arachis duranensis]		arahy.Tifrunner.gnm1.ann1.7J7UQ4.2	47	S	probable alkaline/neutral invertase D [Arachis duranensis]		arahy.Tifrunner.gnm1.ann1.D6AVJJ.1	"mannosyl-oligosaccharide 1,2-alpha-mannosidase MNS3 [Arachis ipaensis]"
arahy.Tifrunner.gnm1.ann1.1Z9FJQ.2	120	T	protein N-lysine methyltransferase METTL21A [Arachis ipaensis]		arahy.Tifrunner.gnm1.ann1.P0GF1S.1	247	S	probable receptor-like protein kinase At1g49730 [Arachis ipaensis]		arahy.Tifrunner.gnm1.ann1.7J7UQ4.2	50	S	probable alkaline/neutral invertase D [Arachis duranensis]		arahy.Tifrunner.gnm1.ann1.D6D033.1	serine/arginine repetitive matrix protein 2 [Arachis duranensis]
arahy.Tifrunner.gnm1.ann1.YHR4LX.1	618	S	"protein indeterminate-domain 4, chloroplastic-like [Arachis ipaensis]"		arahy.Tifrunner.gnm1.ann1.SN2AIN.1	99	S	"glycine-rich RNA-binding, abscisic acid-inducible protein-like [Arachis ipaensis]"		arahy.Tifrunner.gnm1.ann1.7J7UQ4.2	65	S	probable alkaline/neutral invertase D [Arachis duranensis]		arahy.Tifrunner.gnm1.ann1.D6F5S1	putative G3BP-like protein [Arachis duranensis]
arahy.Tifrunner.gnm1.ann1.ADA7T8.2	528	S	enhancer of mRNA-decapping protein 4-like isoform X3 [Arachis duranensis]		arahy.Tifrunner.gnm1.ann1.MI82BM.1	135	S	LOW QUALITY PROTEIN: protein TSS-like [Arachis ipaensis]		arahy.Tifrunner.gnm1.ann1.7J7UQ4.2	70	S	probable alkaline/neutral invertase D [Arachis duranensis]		arahy.Tifrunner.gnm1.ann1.D6JQQQ.2	DNase I superfamily protein [Medicago truncatula]
arahy.Tifrunner.gnm1.ann1.SMM8KX.1	64	S	PLAC8 family protein [Medicago truncatula]		arahy.Tifrunner.gnm1.ann1.GGU5D9.1	199	S	protein TIME FOR COFFEE-like [Arachis duranensis]		arahy.Tifrunner.gnm1.ann1.7J7UQ4.2	77	S	probable alkaline/neutral invertase D [Arachis duranensis]		arahy.Tifrunner.gnm1.ann1.D73BW1	formin-like protein 8 [Glycine max]
arahy.Tifrunner.gnm1.ann1.8JFH4G.1	314	S	autophagy-related protein 18a [Arachis ipaensis]		arahy.Tifrunner.gnm1.ann1.YQJ5CI.1	263	S	binding partner of ACD11 1-like [Arachis duranensis]		arahy.Tifrunner.gnm1.ann1.7JV24P.1	7	S	Thionin-like protein [Medicago truncatula]		arahy.Tifrunner.gnm1.ann1.D79Q71.1	phosphatidate phosphatase PAH1 [Arachis duranensis]
arahy.Tifrunner.gnm1.ann1.YUJY33.1	262	T	DCD (development and cell death) domain protein [Medicago truncatula]		arahy.Tifrunner.gnm1.ann1.S2SRDX.3	90	S	protein DEHYDRATION-INDUCED 19 homolog 7-like [Arachis ipaensis]		arahy.Tifrunner.gnm1.ann1.7KG1FV.2	345	S	serine-rich adhesin for platelets-like [Arachis ipaensis]		arahy.Tifrunner.gnm1.ann1.D7EPY1	patellin-3 [Arachis ipaensis]
arahy.Tifrunner.gnm1.ann1.PAET17.2	344	S	protein WVD2-like 1 isoform X2 [Arachis duranensis]		arahy.Tifrunner.gnm1.ann1.T0GB9L.1	387	S	auxilin-related protein 2-like [Arachis duranensis]		arahy.Tifrunner.gnm1.ann1.7L21K7.1	543	S	inducible nitrate reductase [NADH] 2 [Arachis duranensis]		arahy.Tifrunner.gnm1.ann1.D7QLLZ.1	plant/F18B13-26 protein [Medicago truncatula]
arahy.Tifrunner.gnm1.ann1.PRFK83.1	29	S	rho GDP-dissociation inhibitor 1 [Arachis ipaensis]		arahy.Tifrunner.gnm1.ann1.FYKT6P.1	49	T	SEC12-like protein 2 [Arachis duranensis]		arahy.Tifrunner.gnm1.ann1.7M06WQ.1	191	S	protein WVD2-like 2 [Arachis ipaensis]		arahy.Tifrunner.gnm1.ann1.D7TWRW.1	replication protein A 70 kDa DNA-binding subunit A-like [Arachis ipaensis]
arahy.Tifrunner.gnm1.ann1.M2LW4E.1	206	S	B-cell receptor-associated protein 29-like [Vigna radiata var. radiata]		arahy.Tifrunner.gnm1.ann1.AVGT3S.2	112	S	polyadenylate-binding protein 8 [Arachis duranensis]		arahy.Tifrunner.gnm1.ann1.7M06WQ.1	283	S	protein WVD2-like 2 [Arachis ipaensis]		arahy.Tifrunner.gnm1.ann1.D8DQXR.1	shootin-1-like [Juglans regia]
arahy.Tifrunner.gnm1.ann1.B30RUE.1	134	S	acyl-CoA--sterol O-acyltransferase 1-like [Arachis duranensis]		arahy.Tifrunner.gnm1.ann1.IMP9EL.1	37	S	protein indeterminate-domain 11-like [Arachis ipaensis]		arahy.Tifrunner.gnm1.ann1.7M06WQ.1	313	S	protein WVD2-like 2 [Arachis ipaensis]		arahy.Tifrunner.gnm1.ann1.D93XQM.1	far upstream element-binding protein 2 isoform X2 [Arachis ipaensis]
arahy.Tifrunner.gnm1.ann1.19P32S.1	232	T	lectin alpha chain-like [Arachis duranensis]		arahy.Tifrunner.gnm1.ann1.TIZ9RP.5	334	S	diacylglycerol kinase 1 [Arachis duranensis]		arahy.Tifrunner.gnm1.ann1.7M06WQ.1	328	S	protein WVD2-like 2 [Arachis ipaensis]		arahy.Tifrunner.gnm1.ann1.D93ZMI.1	probable serine incorporator [Arachis ipaensis]
arahy.Tifrunner.gnm1.ann1.Q9RGLK.1	497	Y	U1 small nuclear ribonucleoprotein 70 kDa-like [Cajanus cajan]		arahy.Tifrunner.gnm1.ann1.LT4L2L.1	65	S	"protein CHUP1, chloroplastic isoform X1 [Arachis ipaensis]"		arahy.Tifrunner.gnm1.ann1.7N5RT2.2	282	S	protein SMG7 [Arachis ipaensis]		arahy.Tifrunner.gnm1.ann1.D961U1	monosaccharide-sensing protein 2-like [Arachis ipaensis]
arahy.Tifrunner.gnm1.ann1.8TQ0W2.1	309	S	A-kinase anchor protein 17A-like [Arachis duranensis]		arahy.Tifrunner.gnm1.ann1.J7B49U.1	10	S	"transmembrane protein, putative [Medicago truncatula]"		arahy.Tifrunner.gnm1.ann1.7NR7Q4.1	94	S	serine/arginine-rich splicing factor SR45 [Arachis ipaensis]		arahy.Tifrunner.gnm1.ann1.D98VB5.1	guanine nucleotide-binding protein subunit gamma 2 [Arachis duranensis]
arahy.Tifrunner.gnm1.ann1.L78ELK.2	610	S	epidermal growth factor receptor substrate 15 [Arachis duranensis]		arahy.Tifrunner.gnm1.ann1.88FPG1.1	378	S	zinc finger CCCH domain-containing protein 13-like isoform X2 [Vigna radiata var. radiata]		arahy.Tifrunner.gnm1.ann1.7NR7Q4.1	226	S	serine/arginine-rich splicing factor SR45 [Arachis ipaensis]		arahy.Tifrunner.gnm1.ann1.D9BL0L.1
arahy.Tifrunner.gnm1.ann1.2MH90D.2	157	S	50S ribosomal protein L17-like [Arachis ipaensis]		arahy.Tifrunner.gnm1.ann1.XKSF6X.1	339	S	RNA-binding (RRM/RBD/RNP motif) family protein [Medicago truncatula]		arahy.Tifrunner.gnm1.ann1.7NR7Q4.1	234	S	serine/arginine-rich splicing factor SR45 [Arachis ipaensis]		arahy.Tifrunner.gnm1.ann1.D9ZPCT.4	protein SCAI [Arachis ipaensis]
arahy.Tifrunner.gnm1.ann1.VDB3CB.1	1078	S	CW-type zinc-finger protein [Medicago truncatula]		arahy.Tifrunner.gnm1.ann1.UA6XT5.1	5	T	uncharacterized vacuolar membrane protein YML018C-like isoform X1 [Arachis ipaensis]		arahy.Tifrunner.gnm1.ann1.7NR7Q4.1	253	S	serine/arginine-rich splicing factor SR45 [Arachis ipaensis]		arahy.Tifrunner.gnm1.ann1.DA6R09.1	hydroxyproline-rich glycoprotein family protein [Medicago truncatula]
arahy.Tifrunner.gnm1.ann1.9UH1TF.1	142	S	protein tipD [Arachis ipaensis]		arahy.Tifrunner.gnm1.ann1.VZZ6TG.1	11	S	high affinity nitrate transporter 2.4 [Arachis duranensis]		arahy.Tifrunner.gnm1.ann1.7NR7Q4.1	261	S	serine/arginine-rich splicing factor SR45 [Arachis ipaensis]		arahy.Tifrunner.gnm1.ann1.DB4GMR.1	allene oxide synthase-like [Arachis ipaensis]
arahy.Tifrunner.gnm1.ann1.QCG7AI.1	654	S	ethylene-insensitive protein 2-like isoform X1 [Arachis ipaensis]		arahy.Tifrunner.gnm1.ann1.H1BIFD.1	287	S	heterogeneous nuclear ribonucleoprotein 1-like [Arachis ipaensis]		arahy.Tifrunner.gnm1.ann1.7NR7Q4.1	269	S	serine/arginine-rich splicing factor SR45 [Arachis ipaensis]		arahy.Tifrunner.gnm1.ann1.DBQJ9M.1	DNA-directed RNA polymerases I and III subunit RPAC2-like [Arachis ipaensis]
arahy.Tifrunner.gnm1.ann1.7ZG50Z.1	121	S	"asparagine--tRNA ligase, cytoplasmic 2 [Arachis duranensis]"		arahy.Tifrunner.gnm1.ann1.U4ADFF.1	48	S	calcium/calmodulin-regulated receptor-like kinase 2 [Arachis duranensis]		arahy.Tifrunner.gnm1.ann1.7NR7Q4.1	284	S	serine/arginine-rich splicing factor SR45 [Arachis ipaensis]		arahy.Tifrunner.gnm1.ann1.DC2GX7.1	uncharacterized LOC100788810 [Glycine max]
arahy.Tifrunner.gnm1.ann1.TYLU08.2	455	S	catalase-like [Arachis ipaensis]		arahy.Tifrunner.gnm1.ann1.CC4SXZ.2	59	S	protein MEI2-like 1 isoform X2 [Arachis duranensis]		arahy.Tifrunner.gnm1.ann1.7NR7Q4.1	299	S	serine/arginine-rich splicing factor SR45 [Arachis ipaensis]		arahy.Tifrunner.gnm1.ann1.DC6B04.1	"LOW QUALITY PROTEIN: pyruvate, phosphate dikinase, chloroplastic-like [Arachis ipaensis]"
arahy.Tifrunner.gnm1.ann1.JQ68ST.1	370	S	zinc finger CCCH domain-containing protein 3 [Arachis ipaensis]		arahy.Tifrunner.gnm1.ann1.54E44M.2	57	S	LOW QUALITY PROTEIN: probable serine/threonine-protein kinase At1g54610 [Arachis duranensis]		arahy.Tifrunner.gnm1.ann1.7NR7Q4.1	304	S	serine/arginine-rich splicing factor SR45 [Arachis ipaensis]		arahy.Tifrunner.gnm1.ann1.DD3LG3	COP9 signalosome complex subunit 5b-like isoform X2 [Arachis ipaensis]
arahy.Tifrunner.gnm1.ann1.G7P63M.1	105	S	LOW QUALITY PROTEIN: SAP30-binding protein-like [Arachis duranensis]		arahy.Tifrunner.gnm1.ann1.90HUEH.1	923	S	protein CROWDED NUCLEI 4 [Arachis ipaensis]		arahy.Tifrunner.gnm1.ann1.7NR7Q4.1	311	S	serine/arginine-rich splicing factor SR45 [Arachis ipaensis]		arahy.Tifrunner.gnm1.ann1.DD48CX.1	antigenic heat-stable protein [Arabidopsis thaliana]
arahy.Tifrunner.gnm1.ann1.EPLV3S.1	537	S	probable serine/threonine-protein kinase At1g54610 [Arachis ipaensis]		arahy.Tifrunner.gnm1.ann1.ED1SF9.1	255	T	E3 ubiquitin-protein ligase ATL6 [Arachis duranensis]		arahy.Tifrunner.gnm1.ann1.7NR7Q4.1	332	S	serine/arginine-rich splicing factor SR45 [Arachis ipaensis]		arahy.Tifrunner.gnm1.ann1.DE6SJ1	"ruBisCO large subunit-binding protein subunit beta, chloroplastic-like [Arachis ipaensis]"
arahy.Tifrunner.gnm1.ann1.DJG6PN.1	12	S	tail fiber [Arabidopsis thaliana]		arahy.Tifrunner.gnm1.ann1.7NR7Q4.1	276	T	serine/arginine-rich splicing factor SR45 [Arachis ipaensis]		arahy.Tifrunner.gnm1.ann1.7NR7Q4.1	337	S	serine/arginine-rich splicing factor SR45 [Arachis ipaensis]		arahy.Tifrunner.gnm1.ann1.DENV23.1	plant phospholipase-like protein [Medicago truncatula]
arahy.Tifrunner.gnm1.ann1.L6T0BS.1	140	S	probable choline kinase 2 [Arachis ipaensis]		arahy.Tifrunner.gnm1.ann1.CC2QWC.1	37	S	probable DNA double-strand break repair Rad50 ATPase [Arachis duranensis]		arahy.Tifrunner.gnm1.ann1.7PDB7U.3	49	S	DNA topoisomerase 1-like [Arachis ipaensis]		arahy.Tifrunner.gnm1.ann1.DEZ300.2	"serine/arginine-rich splicing factor SC35, partial [Arachis duranensis]"
arahy.Tifrunner.gnm1.ann1.U6FHN5.1	241	S	stem-specific protein TSJT1-like [Arachis duranensis]		arahy.Tifrunner.gnm1.ann1.CE4N6Q.1	17	S	serine/threonine-protein kinase STE20-like isoform X1 [Arachis duranensis]		arahy.Tifrunner.gnm1.ann1.7PY5NM.1	175	S	ubiquitin-protein ligase [Medicago truncatula]		arahy.Tifrunner.gnm1.ann1.DG4CQN.2	putative glycerol-3-phosphate transporter 1 [Arachis duranensis]
arahy.Tifrunner.gnm1.ann1.KNS6CZ.1	426	T	mediator of RNA polymerase II transcription subunit 1-like [Cajanus cajan]		arahy.Tifrunner.gnm1.ann1.7T7KVP.1	220	S	LOW QUALITY PROTEIN: transcription elongation factor B polypeptide 3 [Arachis duranensis]		arahy.Tifrunner.gnm1.ann1.7PY5NM.1	410	S	ubiquitin-protein ligase [Medicago truncatula]		arahy.Tifrunner.gnm1.ann1.DGK6GV.1	eukaryotic translation initiation factor isoform 4E-2 isoform X1 [Arachis duranensis]
arahy.Tifrunner.gnm1.ann1.GLLM5N.2	118	T	protein RESTRICTED TEV MOVEMENT 2 [Arachis duranensis]		arahy.Tifrunner.gnm1.ann1.LRKT77.1	133	S	vesicle-associated protein 1-2-like [Arachis duranensis]		arahy.Tifrunner.gnm1.ann1.7QGM13.1	28	S	far upstream element-binding protein 2 [Arachis ipaensis]		arahy.Tifrunner.gnm1.ann1.DHC9UX.1	PLATZ transcription factor family protein [Medicago truncatula]
arahy.Tifrunner.gnm1.ann1.8BN0DB.1	200	S	ATP-dependent helicase BRM-like [Arachis ipaensis]		arahy.Tifrunner.gnm1.ann1.897SEY.1	73	S	filaggrin [Arachis duranensis]		arahy.Tifrunner.gnm1.ann1.7R6RP5.1	60	S	myosin-9 [Arachis duranensis]		arahy.Tifrunner.gnm1.ann1.DIK1RJ.1	putative nuclease HARBI1 [Glycine max]
arahy.Tifrunner.gnm1.ann1.AMG8UC.1	74	S	thylakoid soluble phosphoprotein TSP9 protein [Medicago truncatula]		arahy.Tifrunner.gnm1.ann1.UKMX5Y.1	103	S	zinc finger (C3HC4-type RING finger) family protein [Medicago truncatula]		arahy.Tifrunner.gnm1.ann1.7T3N35.1	629	S	BAH domain-containing protein [Medicago truncatula]		arahy.Tifrunner.gnm1.ann1.DJG6PN.1	tail fiber [Arabidopsis thaliana]
arahy.Tifrunner.gnm1.ann1.CB7RQG.1	49	S	plant UBX domain-containing protein 4-like [Arachis duranensis]		arahy.Tifrunner.gnm1.ann1.201XHT.4	893	S	flippase kinase 1 [Arachis ipaensis]		arahy.Tifrunner.gnm1.ann1.7T3N35.1	650	S	BAH domain-containing protein [Medicago truncatula]		arahy.Tifrunner.gnm1.ann1.DK6PZW.1	RING/U-box protein [Medicago truncatula]
arahy.Tifrunner.gnm1.ann1.GD50BS.2	74	S	"threonine--tRNA ligase, mitochondrial 1 [Arachis ipaensis]"		arahy.Tifrunner.gnm1.ann1.RRC04T.1	303	S	respiratory burst oxidase homolog protein B [Arachis ipaensis]		arahy.Tifrunner.gnm1.ann1.7T7KVP.1	220	S	LOW QUALITY PROTEIN: transcription elongation factor B polypeptide 3 [Arachis duranensis]		arahy.Tifrunner.gnm1.ann1.DK9749.2	katanin p80 WD40 repeat-containing subunit B1 homolog [Arachis ipaensis]
arahy.Tifrunner.gnm1.ann1.5539WM.1	42	S	mitochondrial import inner membrane translocase subunit TIM17-2-like [Arachis duranensis]		arahy.Tifrunner.gnm1.ann1.H0TFP9.1	76	S	serine/threonine-protein kinase HT1-like [Arachis duranensis]		arahy.Tifrunner.gnm1.ann1.7T9QNI.1	15	S	"plant/F1L3-4 protein, putative [Medicago truncatula]"		arahy.Tifrunner.gnm1.ann1.DL0K3Y.3	"transmembrane protein, putative [Medicago truncatula]"
arahy.Tifrunner.gnm1.ann1.3M2LT7.1	195	S	serine/arginine-rich splicing factor RS40 isoform X1 [Arachis ipaensis]		arahy.Tifrunner.gnm1.ann1.W8G9JC.1	185	S	potassium transporter 7-like [Arachis ipaensis]		arahy.Tifrunner.gnm1.ann1.7T9QNI.1	90	S	"plant/F1L3-4 protein, putative [Medicago truncatula]"		arahy.Tifrunner.gnm1.ann1.DLXF41.1	blue copper protein-like [Arachis duranensis]
arahy.Tifrunner.gnm1.ann1.T4SHUS.2	183	S	protein transport protein SEC31 isoform X1 [Arachis duranensis]		arahy.Tifrunner.gnm1.ann1.7J7UQ4.2	50	S	probable alkaline/neutral invertase D [Arachis duranensis]		arahy.Tifrunner.gnm1.ann1.7TG5YP.1	130	S	heavy metal-associated isoprenylated plant protein 26 [Arachis ipaensis]		arahy.Tifrunner.gnm1.ann1.DM09BN.1	protein NRT1/ PTR FAMILY 5.1-like [Arachis ipaensis]
arahy.Tifrunner.gnm1.ann1.EPQ3BP.1	411	S	putative disease resistance RPP13-like protein 2 [Oryza sativa Japonica Group]		arahy.Tifrunner.gnm1.ann1.W0EE9C.1	218	S	cellulose synthase A catalytic subunit 3 [UDP-forming]-like [Arachis duranensis]		arahy.Tifrunner.gnm1.ann1.7TGU71.1	294	S	polyadenylate-binding protein-interacting protein 3-like isoform X4 [Arachis ipaensis]		arahy.Tifrunner.gnm1.ann1.DM6910.3	DUF674 family protein [Medicago truncatula]
arahy.Tifrunner.gnm1.ann1.RY2Y1Z.1	69	T	auxin-repressed 12.5 kDa protein-like [Arachis ipaensis]		arahy.Tifrunner.gnm1.ann1.IJVD3H.2	205	T	cyclin-dependent kinase C-2-like [Glycine max]		arahy.Tifrunner.gnm1.ann1.7TGU71.1	367	S	polyadenylate-binding protein-interacting protein 3-like isoform X4 [Arachis ipaensis]		arahy.Tifrunner.gnm1.ann1.DNYC70.1	probable LRR receptor-like serine/threonine-protein kinase At1g67720 isoform X1 [Arachis ipaensis]
arahy.Tifrunner.gnm1.ann1.RUL3CT.2	57	T	26S proteasome regulatory subunit 4 homolog A [Arachis duranensis]		arahy.Tifrunner.gnm1.ann1.W5XP03.2	776	S	RNA polymerase II C-terminal domain phosphatase-like 3 isoform X2 [Arachis ipaensis]		arahy.Tifrunner.gnm1.ann1.7U0171	222	S	seed linoleate 9S-lipoxygenase-3-like [Arachis duranensis]		arahy.Tifrunner.gnm1.ann1.DPIX5V.3	transcriptional corepressor LEUNIG-like isoform X2 [Arachis duranensis]
arahy.Tifrunner.gnm1.ann1.N0MV1J.1	105	T	vacuolar amino acid transporter 1 [Arachis ipaensis]		arahy.Tifrunner.gnm1.ann1.VF4M4N.5	85	S	E3 ubiquitin-protein ligase KEG [Arachis ipaensis]		arahy.Tifrunner.gnm1.ann1.7UX44P.1	415	S	serine/threonine-protein kinase tricorner [Arachis ipaensis]		arahy.Tifrunner.gnm1.ann1.DQ4RIU.1	inactive protein RESTRICTED TEV MOVEMENT 2-like [Arachis ipaensis]
arahy.Tifrunner.gnm1.ann1.E22JQ7.2	275	S	AUGMIN subunit 3 [Arachis ipaensis]		arahy.Tifrunner.gnm1.ann1.99PJJG.1	356	S	probable transcription factor PosF21 [Arachis ipaensis]		arahy.Tifrunner.gnm1.ann1.7UX44P.1	442	S	serine/threonine-protein kinase tricorner [Arachis ipaensis]		arahy.Tifrunner.gnm1.ann1.DQYB4L.1	YTH domain-containing protein 1-like [Cajanus cajan]
arahy.Tifrunner.gnm1.ann1.YX753W.1	475	S	colon cancer-associated Mic1-like protein [Medicago truncatula]		arahy.Tifrunner.gnm1.ann1.R0SDX6.2	67	S	flowering time control protein FCA-like [Arachis ipaensis]		arahy.Tifrunner.gnm1.ann1.7UX44P.1	459	S	serine/threonine-protein kinase tricorner [Arachis ipaensis]		arahy.Tifrunner.gnm1.ann1.DS0JBP.1	protein STRUBBELIG-RECEPTOR FAMILY 3-like [Arachis ipaensis]
arahy.Tifrunner.gnm1.ann1.K2PXHZ.1	306	S	serine/arginine-rich splicing factor SR45 [Arachis ipaensis]		arahy.Tifrunner.gnm1.ann1.B5VTGG.2	85	S	splicing factor U2af large subunit B-like [Arachis ipaensis]		arahy.Tifrunner.gnm1.ann1.7VP81J.1	397	S	"transmembrane protein, putative [Medicago truncatula]"		arahy.Tifrunner.gnm1.ann1.DSL29X.1	"splicing factor, suppressor of white-apricot homolog isoform X1 [Arachis ipaensis]"
arahy.Tifrunner.gnm1.ann1.8X2EGT.1	59	S	"glucose-1-phosphate adenylyltransferase large subunit 1, chloroplastic isoform X2 [Arachis duranensis]"		arahy.Tifrunner.gnm1.ann1.L8L5ZS.1	42	S	SPla/RYanodine receptor (SPRY) domain protein [Medicago truncatula]		arahy.Tifrunner.gnm1.ann1.7VZ02V.1	5	S	photosystem I P700 chlorophyll a apoprotein A1 (chloroplast) [Lupinus luteus]		arahy.Tifrunner.gnm1.ann1.DT0NN1	phosphoenolpyruvate carboxykinase [ATP]-like [Arachis duranensis]
arahy.Tifrunner.gnm1.ann1.4DJY3R.1	102	S	"keratin, type I cytoskeletal 10-like [Arachis duranensis]"		arahy.Tifrunner.gnm1.ann1.W4Z8DF.2	736	S	calcium permeable stress-gated cation channel 1-like [Arachis duranensis]		arahy.Tifrunner.gnm1.ann1.7WD3S2	37	S	serine/arginine-rich splicing factor SR45 [Arachis duranensis]		arahy.Tifrunner.gnm1.ann1.DT5ZW2	auxin transport protein BIG [Arachis ipaensis]
arahy.Tifrunner.gnm1.ann1.Z7C896.1	163	S	mitogen-activated protein kinase kinase kinase YODA-like [Arachis duranensis]		arahy.Tifrunner.gnm1.ann1.4D1XNM.2	149	S	SNARE-associated-like protein [Medicago truncatula]		arahy.Tifrunner.gnm1.ann1.7WD3S2	39	S	serine/arginine-rich splicing factor SR45 [Arachis duranensis]		arahy.Tifrunner.gnm1.ann1.DV54YZ.1	tRNA (guanine-N(7)-)-methyltransferase non-catalytic subunit wdr4 [Arachis ipaensis]
arahy.Tifrunner.gnm1.ann1.48W8D3.1	24	S	protein MEI2-like 5 [Arachis ipaensis]		arahy.Tifrunner.gnm1.ann1.GY6ZBB.2	280	S	protein NUCLEAR FUSION DEFECTIVE 4-like [Arachis ipaensis]		arahy.Tifrunner.gnm1.ann1.7WD3S2	79	S	serine/arginine-rich splicing factor SR45 [Arachis duranensis]		arahy.Tifrunner.gnm1.ann1.DW5X61	sucrose synthase 5 isoform X2 [Arachis ipaensis]
arahy.Tifrunner.gnm1.ann1.EKN3RA.1	30	T	sugar transporter ERD6-like 6 isoform X1 [Arachis duranensis]		arahy.Tifrunner.gnm1.ann1.YJZ5EZ.1	201	S	protein FREE1-like [Arachis duranensis]		arahy.Tifrunner.gnm1.ann1.7WD3S2	81	S	serine/arginine-rich splicing factor SR45 [Arachis duranensis]		arahy.Tifrunner.gnm1.ann1.DX8RY1	double-stranded RNA-binding protein 1-like isoform X4 [Arachis duranensis]
arahy.Tifrunner.gnm1.ann1.ZLH3PG.3	724	S	agenet domain protein [Medicago truncatula]		arahy.Tifrunner.gnm1.ann1.C1QR5S.2	57	S	metal tolerance protein C2 isoform X2 [Arachis ipaensis]		arahy.Tifrunner.gnm1.ann1.7WD3S2	94	S	serine/arginine-rich splicing factor SR45 [Arachis duranensis]		arahy.Tifrunner.gnm1.ann1.DY9K7Z.1	serine/threonine-protein kinase pakG-like [Cajanus cajan]
arahy.Tifrunner.gnm1.ann1.XPFB8W.1	185	S	protein RESTRICTED TEV MOVEMENT 2-like [Lupinus angustifolius]		arahy.Tifrunner.gnm1.ann1.SLD6BY.2	345	S	probable protein S-acyltransferase 7 isoform X2 [Arachis ipaensis]		arahy.Tifrunner.gnm1.ann1.7WD3S2	100	S	serine/arginine-rich splicing factor SR45 [Arachis duranensis]		arahy.Tifrunner.gnm1.ann1.E06EVW.1	heterogeneous nuclear ribonucleoprotein 1 isoform X1 [Arachis duranensis]
arahy.Tifrunner.gnm1.ann1.QM1LQ0.1	416	S	protein EMBRYONIC FLOWER 1-like isoform X1 [Arachis duranensis]		arahy.Tifrunner.gnm1.ann1.F79NB3.1	143	S	AMP deaminase-like [Arachis ipaensis]		arahy.Tifrunner.gnm1.ann1.7WD3S2	118	S	serine/arginine-rich splicing factor SR45 [Arachis duranensis]		arahy.Tifrunner.gnm1.ann1.E07VAV.2	chromo domain-containing protein LHP1-like [Arachis ipaensis]
arahy.Tifrunner.gnm1.ann1.K23Z11.1	34	T	transcription factor VIP1 [Arachis duranensis]		arahy.Tifrunner.gnm1.ann1.8SJW9U.2	706	S	serine/threonine-protein kinase STE20-like isoform X1 [Arachis duranensis]		arahy.Tifrunner.gnm1.ann1.7WD3S2	195	S	serine/arginine-rich splicing factor SR45 [Arachis duranensis]		arahy.Tifrunner.gnm1.ann1.E0MR6R.1	U-box domain-containing protein 35 isoform X1 [Arachis ipaensis]
arahy.Tifrunner.gnm1.ann1.BC87BJ.3	93	S	vacuolar amino acid transporter 1 [Arachis ipaensis]		arahy.Tifrunner.gnm1.ann1.YJRC23.1	127	S	bromodomain-containing protein 4 [Arachis duranensis]		arahy.Tifrunner.gnm1.ann1.7WD3S2	221	S	serine/arginine-rich splicing factor SR45 [Arachis duranensis]		arahy.Tifrunner.gnm1.ann1.E10R0K.1	phosphoinositide phosphatase SAC2-like [Arachis ipaensis]
arahy.Tifrunner.gnm1.ann1.P6P9CF.1	3296	S	GYF domain protein [Medicago truncatula]		arahy.Tifrunner.gnm1.ann1.R8LTT2.1	71	S	protein phosphatase 2C 29-like [Arachis duranensis]		arahy.Tifrunner.gnm1.ann1.7WD3S2	281	S	serine/arginine-rich splicing factor SR45 [Arachis duranensis]		arahy.Tifrunner.gnm1.ann1.E179ZT.1	DUF1639 family protein [Medicago truncatula]
arahy.Tifrunner.gnm1.ann1.84FHQN.1	749	S	epidermal growth factor receptor substrate 15-like 1 isoform X1 [Arachis duranensis]		arahy.Tifrunner.gnm1.ann1.PFT7LK.1	338	S	dnaJ protein homolog 1-like [Arachis duranensis]		arahy.Tifrunner.gnm1.ann1.7WD3S2	292	S	serine/arginine-rich splicing factor SR45 [Arachis duranensis]		arahy.Tifrunner.gnm1.ann1.E1EB00.1	ENHANCER OF AG-4 protein 2 [Arachis duranensis]
arahy.Tifrunner.gnm1.ann1.PW0UPQ.3	509	S	serine/threonine-protein phosphatase 6 regulatory subunit 3-like [Arachis ipaensis]		arahy.Tifrunner.gnm1.ann1.G00RBV.1	142	S	la-related protein 1B-like [Arachis duranensis]		arahy.Tifrunner.gnm1.ann1.7WD3S2	309	S	serine/arginine-rich splicing factor SR45 [Arachis duranensis]		arahy.Tifrunner.gnm1.ann1.E1Q401	mechanosensitive ion channel protein 10-like isoform X2 [Arachis duranensis]
arahy.Tifrunner.gnm1.ann1.ZH4NLG.1	857	S	probable serine/threonine protein kinase IREH1 isoform X1 [Arachis duranensis]		arahy.Tifrunner.gnm1.ann1.T9PEUM.1	384	S	B3 domain-containing transcription factor VRN1 isoform X1 [Arachis duranensis]		arahy.Tifrunner.gnm1.ann1.7WD3S2	331	S	serine/arginine-rich splicing factor SR45 [Arachis duranensis]		arahy.Tifrunner.gnm1.ann1.E1WP71.2	hepatocellular carcinoma-associated antigen 59 [Medicago truncatula]
arahy.Tifrunner.gnm1.ann1.L78ELK.2	575	S	epidermal growth factor receptor substrate 15 [Arachis duranensis]		arahy.Tifrunner.gnm1.ann1.ZK214A.2	23	S	protein LIKE COV 1-like [Arachis duranensis]		arahy.Tifrunner.gnm1.ann1.7WD3S2	333	S	serine/arginine-rich splicing factor SR45 [Arachis duranensis]		arahy.Tifrunner.gnm1.ann1.E22JQ7.2	AUGMIN subunit 3 [Arachis ipaensis]
arahy.Tifrunner.gnm1.ann1.AUQB01.1	224	S	latex abundant protein 1 [Populus trichocarpa]		arahy.Tifrunner.gnm1.ann1.0B6IYK.2	224	S	GEM-like protein 1 [Arachis duranensis]		arahy.Tifrunner.gnm1.ann1.7WKR24.1	617	S	eukaryotic translation initiation factor 4G-like isoform X1 [Arachis duranensis]		arahy.Tifrunner.gnm1.ann1.E2EBD1	elongation factor 1-gamma-like [Arachis duranensis]
arahy.Tifrunner.gnm1.ann1.DNYC70.1	440	S	probable LRR receptor-like serine/threonine-protein kinase At1g67720 isoform X1 [Arachis ipaensis]		arahy.Tifrunner.gnm1.ann1.230XUM.2	423	S	heterogeneous nuclear ribonucleoprotein 1-like [Arachis ipaensis]		arahy.Tifrunner.gnm1.ann1.7WKR24.1	621	S	eukaryotic translation initiation factor 4G-like isoform X1 [Arachis duranensis]		arahy.Tifrunner.gnm1.ann1.E2R4RP.1	LOW QUALITY PROTEIN: mediator of RNA polymerase II transcription subunit 14-like [Arachis duranensis]
arahy.Tifrunner.gnm1.ann1.632UCW.1	32	S	pheromone receptor-like protein [Medicago truncatula]		arahy.Tifrunner.gnm1.ann1.J65KEH.1	197	S	serine/arginine-rich SC35-like splicing factor SCL30 [Arachis ipaensis]		arahy.Tifrunner.gnm1.ann1.7WMI9V.1	773	S	EIN3-binding F-box protein 2-like [Arachis ipaensis]		arahy.Tifrunner.gnm1.ann1.E2WYS1.1	ATP-dependent 6-phosphofructokinase 3-like [Arachis ipaensis]
arahy.Tifrunner.gnm1.ann1.8X00QX.1	360	S	scarecrow-like protein 34 [Arachis duranensis]		arahy.Tifrunner.gnm1.ann1.39P5NE.1	137	S	187-kDa microtubule-associated protein AIR9 [Arachis duranensis]		arahy.Tifrunner.gnm1.ann1.7X1Y1S.1	106	S	HMG-Y-related protein A-like [Arachis ipaensis]		arahy.Tifrunner.gnm1.ann1.E3R8VW.1	eukaryotic translation initiation factor 2 subunit alpha [Arachis duranensis]
arahy.Tifrunner.gnm1.ann1.K04ERL.1	256	S	mitochondrial outer membrane import complex protein METAXIN [Arachis duranensis]		arahy.Tifrunner.gnm1.ann1.X5HSKX.1	24	S	cellulose synthase A catalytic subunit 1 [UDP-forming] [Arachis ipaensis]		arahy.Tifrunner.gnm1.ann1.7X1Y1S.1	156	S	HMG-Y-related protein A-like [Arachis ipaensis]		arahy.Tifrunner.gnm1.ann1.E495RS.2	CDPK-related kinase 5 [Arachis ipaensis]
arahy.Tifrunner.gnm1.ann1.VT94RC.1	13	T	BSD domain protein [Medicago truncatula]		arahy.Tifrunner.gnm1.ann1.GCEP91.2	513	T	gibberellin-regulated family protein [Medicago truncatula]		arahy.Tifrunner.gnm1.ann1.7Z6R16.1	208	S	"polyphenol oxidase, chloroplastic-like [Arachis duranensis]"		arahy.Tifrunner.gnm1.ann1.E56BAP.1	serine/threonine-protein kinase STY8-like isoform X1 [Arachis duranensis]
arahy.Tifrunner.gnm1.ann1.ZC4720.2	183	S	clathrin interactor EPSIN 1 [Arachis duranensis]		arahy.Tifrunner.gnm1.ann1.SV5HQC.1	247	S	serine/threonine-protein kinase At5g01020 [Arachis ipaensis]		arahy.Tifrunner.gnm1.ann1.7ZG50Z.1	121	S	"asparagine--tRNA ligase, cytoplasmic 2 [Arachis duranensis]"		arahy.Tifrunner.gnm1.ann1.E5AZB0.1	5-methyltetrahydropteroyltriglutamate--homocysteine methyltransferase 2 [Arachis ipaensis]
arahy.Tifrunner.gnm1.ann1.ZWJH5S.2	1292	S	"dentin sialophosphoprotein-like protein, putative [Medicago truncatula]"		arahy.Tifrunner.gnm1.ann1.918JYJ.1	644	S	protein QUIRKY [Arachis ipaensis]		arahy.Tifrunner.gnm1.ann1.810EMS.2	62	S	ABC transporter G family member 22-like [Arachis duranensis]		arahy.Tifrunner.gnm1.ann1.E5CV98.1	LOW QUALITY PROTEIN: mediator of RNA polymerase II transcription subunit 15a-like [Arachis duranensis]
arahy.Tifrunner.gnm1.ann1.S4R36H.2	401	S	eukaryotic translation initiation factor 3 subunit M-like [Arachis duranensis]		arahy.Tifrunner.gnm1.ann1.0XH4EA.1	541	Y	putative disease resistance protein At3g14460 isoform X1 [Arachis duranensis]		arahy.Tifrunner.gnm1.ann1.810EMS.2	78	S	ABC transporter G family member 22-like [Arachis duranensis]		arahy.Tifrunner.gnm1.ann1.E5GBG1	serine/threonine-protein kinase GRIK2-like [Arachis duranensis]
arahy.Tifrunner.gnm1.ann1.VE4HHH.1	788	S	SWI/SNF complex subunit SWI3D [Arachis ipaensis]		arahy.Tifrunner.gnm1.ann1.E06EVW.1	421	S	heterogeneous nuclear ribonucleoprotein 1 isoform X1 [Arachis duranensis]		arahy.Tifrunner.gnm1.ann1.81342Q.1	6	S	UPF0695 membrane protein C977.11/PB8B6.06c [Arachis ipaensis]		arahy.Tifrunner.gnm1.ann1.E6QCJN.2	probable auxin efflux carrier component 1b [Arachis ipaensis]
arahy.Tifrunner.gnm1.ann1.LSIN77.1	13	S	beta-glucuronosyltransferase GlcAT14A-like [Arachis ipaensis]		arahy.Tifrunner.gnm1.ann1.4FD105.2	413	T	protein KAKU4-like isoform X5 [Glycine max]		arahy.Tifrunner.gnm1.ann1.81342Q.1	12	S	UPF0695 membrane protein C977.11/PB8B6.06c [Arachis ipaensis]		arahy.Tifrunner.gnm1.ann1.E6T32I.1	DNA ligase 1-like isoform X2 [Arachis ipaensis]
arahy.Tifrunner.gnm1.ann1.S5Z9V6.1	330	S	cyclin-dependent kinase D-2-like [Arachis duranensis]		arahy.Tifrunner.gnm1.ann1.RY2Y1Z.1	30	S	auxin-repressed 12.5 kDa protein-like [Arachis ipaensis]		arahy.Tifrunner.gnm1.ann1.81342Q.1	60	S	UPF0695 membrane protein C977.11/PB8B6.06c [Arachis ipaensis]		arahy.Tifrunner.gnm1.ann1.E7873Y.3	serine/arginine repetitive matrix protein 2 isoform X3 [Glycine max]
arahy.Tifrunner.gnm1.ann1.Z1TE7K.1	162	S	non-specific phospholipase C3-like [Arachis ipaensis]		arahy.Tifrunner.gnm1.ann1.RJI6AK.1	136	S	myosin-5-like [Glycine max]		arahy.Tifrunner.gnm1.ann1.81342Q.1	64	S	UPF0695 membrane protein C977.11/PB8B6.06c [Arachis ipaensis]		arahy.Tifrunner.gnm1.ann1.E79XB2	vacuolar amino acid transporter 1-like isoform X1 [Arachis ipaensis]
arahy.Tifrunner.gnm1.ann1.E2XQ4Y.1	670	S	MATH domain-containing protein At5g43560-like [Arachis ipaensis]		arahy.Tifrunner.gnm1.ann1.IGE775.1	33	S	kinesin light chain [Arachis ipaensis]		arahy.Tifrunner.gnm1.ann1.827X5P.1	9	S	DUF810 family protein [Medicago truncatula]		arahy.Tifrunner.gnm1.ann1.E7I0EY.1	DUF1262 family protein [Medicago truncatula]
arahy.Tifrunner.gnm1.ann1.9K9ZRS.2	443	T	protein UPSTREAM OF FLC-like [Arachis ipaensis]		arahy.Tifrunner.gnm1.ann1.EMDZ87.1	64	S	plant/F24K9-26 protein [Medicago truncatula]		arahy.Tifrunner.gnm1.ann1.827X5P.1	13	S	DUF810 family protein [Medicago truncatula]		arahy.Tifrunner.gnm1.ann1.E7IC8N.1	putative kinase-like protein TMKL1 [Arachis duranensis]
arahy.Tifrunner.gnm1.ann1.8ME29W.2	25	S	calcium-dependent protein kinase-like [Arachis ipaensis]		arahy.Tifrunner.gnm1.ann1.P96X61.3	87	S	"fructose-bisphosphate aldolase 1, chloroplastic-like [Arachis duranensis]"		arahy.Tifrunner.gnm1.ann1.827X5P.1	130	S	DUF810 family protein [Medicago truncatula]		arahy.Tifrunner.gnm1.ann1.E7JC21	plant UBX domain-containing protein 7 isoform X1 [Arachis duranensis]
arahy.Tifrunner.gnm1.ann1.B4WRN4.1	289	S	coilin isoform X1 [Arachis ipaensis]		arahy.Tifrunner.gnm1.ann1.ZA5ISV.1	546	S	DEAD-box ATP-dependent RNA helicase 5 [Arachis ipaensis]		arahy.Tifrunner.gnm1.ann1.827X5P.1	138	S	DUF810 family protein [Medicago truncatula]		arahy.Tifrunner.gnm1.ann1.E7RSE6.1	filaggrin [Arachis ipaensis]
arahy.Tifrunner.gnm1.ann1.K2PXHZ.1	174	S	serine/arginine-rich splicing factor SR45 [Arachis ipaensis]		arahy.Tifrunner.gnm1.ann1.TH49EC.2	1127	S	SH3 domain protein [Medicago truncatula]		arahy.Tifrunner.gnm1.ann1.82UWY2.1	88	S	heat shock cognate 70 kDa protein 2-like [Arachis ipaensis]		arahy.Tifrunner.gnm1.ann1.E7WHUM.1	"sec-independent protein translocase protein TATA, chloroplastic [Arachis ipaensis]"
arahy.Tifrunner.gnm1.ann1.U22P6L.1	248	S	titin homolog [Arachis ipaensis]		arahy.Tifrunner.gnm1.ann1.Z70S0B.2	769	S	DNA ligase 1-like isoform X1 [Arachis duranensis]		arahy.Tifrunner.gnm1.ann1.8420T1	27	S	pto-interacting protein 1-like [Arachis ipaensis]		arahy.Tifrunner.gnm1.ann1.E7XD18.1	chloride channel protein CLC-f [Arachis ipaensis]
arahy.Tifrunner.gnm1.ann1.Q0U0LT.1	200	S	uridylate kinase [Arachis duranensis]		arahy.Tifrunner.gnm1.ann1.EA9INV.1	315	S	protein WVD2-like 2 [Arachis ipaensis]		arahy.Tifrunner.gnm1.ann1.84FHQN.1	281	S	epidermal growth factor receptor substrate 15-like 1 isoform X1 [Arachis duranensis]		arahy.Tifrunner.gnm1.ann1.E8CC81	phosphoenolpyruvate carboxylase 2 [Arachis duranensis]
arahy.Tifrunner.gnm1.ann1.S2AW47.1	32	T	auxin-independent growth promoter-like protein [Medicago truncatula]		arahy.Tifrunner.gnm1.ann1.9HQ4ZM.1	552	S	catalytic/pyridoxal phosphate-binding protein [Medicago truncatula]		arahy.Tifrunner.gnm1.ann1.84FHQN.1	743	S	epidermal growth factor receptor substrate 15-like 1 isoform X1 [Arachis duranensis]		arahy.Tifrunner.gnm1.ann1.E8KUAX.2	serine/arginine-rich SC35-like splicing factor SCL28 [Arachis duranensis]
arahy.Tifrunner.gnm1.ann1.NWS29J.2	287	T	squamosa promoter-binding-like protein 14 isoform X2 [Arachis ipaensis]		arahy.Tifrunner.gnm1.ann1.SZ6KWI.1	123	S	plant intracellular Ras-group-related LRR protein 4-like [Arachis duranensis]		arahy.Tifrunner.gnm1.ann1.84FHQN.1	783	S	epidermal growth factor receptor substrate 15-like 1 isoform X1 [Arachis duranensis]		arahy.Tifrunner.gnm1.ann1.E9249P.1	"1,2-dihydroxy-3-keto-5-methylthiopentene dioxygenase 2-like [Arachis ipaensis]"
arahy.Tifrunner.gnm1.ann1.ZM0570.1	22	S	zinc finger CCHC domain-containing protein 9-like [Arachis duranensis]		arahy.Tifrunner.gnm1.ann1.68Y3DI.2	106	T	BZIP protein [Medicago truncatula]		arahy.Tifrunner.gnm1.ann1.84FHQN.1	796	S	epidermal growth factor receptor substrate 15-like 1 isoform X1 [Arachis duranensis]		arahy.Tifrunner.gnm1.ann1.E98N96.2	auxin response factor 9-like isoform X3 [Arachis duranensis]
arahy.Tifrunner.gnm1.ann1.Q5B35H.1	55	T	auxin-repressed 12.5 kDa protein-like [Arachis ipaensis]		arahy.Tifrunner.gnm1.ann1.RVM1DJ.1	390	S	B3 domain-containing transcription factor VRN1 isoform X1 [Arachis duranensis]		arahy.Tifrunner.gnm1.ann1.84FHQN.1	802	S	epidermal growth factor receptor substrate 15-like 1 isoform X1 [Arachis duranensis]		arahy.Tifrunner.gnm1.ann1.E9FYC3.1	LOW QUALITY PROTEIN: isoprenylcysteine alpha-carbonyl methylesterase ICME-like [Arachis duranensis]
arahy.Tifrunner.gnm1.ann1.MV6I8X.1	263	S	3-phosphoinositide-dependent protein kinase 2-like isoform X1 [Arachis duranensis]		arahy.Tifrunner.gnm1.ann1.XMHI28.1	116	S	probable receptor-like protein kinase At3g55450 [Arachis duranensis]		arahy.Tifrunner.gnm1.ann1.84FHQN.1	804	S	epidermal growth factor receptor substrate 15-like 1 isoform X1 [Arachis duranensis]		arahy.Tifrunner.gnm1.ann1.E9H6BI.1	DNA topoisomerase 1-like [Arachis duranensis]
arahy.Tifrunner.gnm1.ann1.LTXE73.1	3	S	ATRAD3-like protein [Medicago truncatula]		arahy.Tifrunner.gnm1.ann1.M6YT3U.1	352	S	"sedoheptulose-1,7-bisphosphatase, chloroplastic [Arachis ipaensis]"		arahy.Tifrunner.gnm1.ann1.84FHQN.1	978	S	epidermal growth factor receptor substrate 15-like 1 isoform X1 [Arachis duranensis]		arahy.Tifrunner.gnm1.ann1.E9QAB1	sericin 1 isoform X1 [Arachis ipaensis]
arahy.Tifrunner.gnm1.ann1.09XT1N.1	336	S	probable protein S-acyltransferase 7 [Arachis duranensis]		arahy.Tifrunner.gnm1.ann1.PZQ5IT.2	49	S	vacuolar protein-sorting-associated protein 37 homolog 1-like [Arachis ipaensis]		arahy.Tifrunner.gnm1.ann1.84JEJ8.3	9	S	mitogen-activated protein kinase kinase 2 [Arachis ipaensis]		arahy.Tifrunner.gnm1.ann1.EA09C8.2	probable GMP synthase [glutamine-hydrolyzing] [Glycine max]
arahy.Tifrunner.gnm1.ann1.70YL0N.3	434	T	double-stranded RNA-binding protein 6-like isoform X8 [Arachis ipaensis]		arahy.Tifrunner.gnm1.ann1.GBJ0AR.1	201	S	putative potassium transporter 12 [Arachis duranensis]		arahy.Tifrunner.gnm1.ann1.84QBSM.1	254	S	TMV resistance protein N-like [Arachis ipaensis]		arahy.Tifrunner.gnm1.ann1.EA9INV.1	protein WVD2-like 2 [Arachis ipaensis]
arahy.Tifrunner.gnm1.ann1.16GZH2.1	53	S	lysine-rich arabinogalactan protein 19-like [Arachis duranensis]		arahy.Tifrunner.gnm1.ann1.DE6SJA.1	68	S	"ruBisCO large subunit-binding protein subunit beta, chloroplastic-like [Arachis ipaensis]"		arahy.Tifrunner.gnm1.ann1.84W2TN.2	308	S	tubby-like F-box protein 8 [Arachis duranensis]		arahy.Tifrunner.gnm1.ann1.EBD5YY.3	beclin-1-like protein isoform X1 [Arachis duranensis]
arahy.Tifrunner.gnm1.ann1.ZE7QP6.1	331	T	protein IQ-DOMAIN 14 isoform X1 [Arachis duranensis]		arahy.Tifrunner.gnm1.ann1.J65KEH.1	210	S	serine/arginine-rich SC35-like splicing factor SCL30 [Arachis ipaensis]		arahy.Tifrunner.gnm1.ann1.858FV1	267	S	protein BOBBER 1 [Arachis duranensis]		arahy.Tifrunner.gnm1.ann1.EBNM32	lysine histidine transporter-like 2 [Arachis ipaensis]
arahy.Tifrunner.gnm1.ann1.Z69TJ6.1	20	S	cystic fibrosis transmembrane conductance regulator [Arabidopsis thaliana]		arahy.Tifrunner.gnm1.ann1.84FHQN.1	804	S	epidermal growth factor receptor substrate 15-like 1 isoform X1 [Arachis duranensis]		arahy.Tifrunner.gnm1.ann1.85J3HU.1	94	S	histone H1-like [Arachis ipaensis]		arahy.Tifrunner.gnm1.ann1.ECYT91	"28 kDa ribonucleoprotein, chloroplastic isoform X1 [Arachis duranensis]"
arahy.Tifrunner.gnm1.ann1.GB2ICR.2	19	S	lysine histidine transporter-like 8 [Arachis duranensis]		arahy.Tifrunner.gnm1.ann1.KS7331.1	325	S	mitogen-activated protein kinase kinase kinase YODA-like [Arachis ipaensis]		arahy.Tifrunner.gnm1.ann1.85Z4HY.1	91	S	"transmembrane protein, putative [Medicago truncatula]"		arahy.Tifrunner.gnm1.ann1.ECZ3V7.1	heat shock 70 kDa protein-like [Arachis duranensis]
arahy.Tifrunner.gnm1.ann1.PHPT4F.1	133	S	transcription factor HBP-1b(c38)-like isoform X2 [Arachis ipaensis]		arahy.Tifrunner.gnm1.ann1.T6TPBC.2	443	S	zinc ion-binding protein [Medicago truncatula]		arahy.Tifrunner.gnm1.ann1.860WY5.2	112	S	protein DOWNY MILDEW RESISTANCE 6 [Arachis ipaensis]		arahy.Tifrunner.gnm1.ann1.ED1SF9.1	E3 ubiquitin-protein ligase ATL6 [Arachis duranensis]
arahy.Tifrunner.gnm1.ann1.2YXT8K.4	328	S	mitogen-activated protein kinase kinase kinase YODA-like [Arachis duranensis]		arahy.Tifrunner.gnm1.ann1.26W00C.1	339	S	putative RNA-binding protein Luc7-like 2 [Arachis duranensis]		arahy.Tifrunner.gnm1.ann1.861X9K.2	608	S	protein EFR3 homolog B-like isoform X2 [Arachis ipaensis]		arahy.Tifrunner.gnm1.ann1.EGZ2QM.1	WD-40 repeat-containing protein MSI4-like [Arachis ipaensis]
arahy.Tifrunner.gnm1.ann1.S8BAEK.1	1101	S	guanine nucleotide exchange factor SPIKE 1 [Arachis ipaensis]		arahy.Tifrunner.gnm1.ann1.H8DYH4.1	187	S	BTB/POZ domain-containing protein At1g67900 [Arachis duranensis]		arahy.Tifrunner.gnm1.ann1.86BA7N.3	1302	S	NADP-specific glutamate dehydrogenase-like isoform X1 [Arachis ipaensis]		arahy.Tifrunner.gnm1.ann1.EII57S.1	probable membrane-associated kinase regulator 2 [Arachis duranensis]
arahy.Tifrunner.gnm1.ann1.LU3K0H.4	47	S	armadillo repeat-containing kinesin-like protein 2 [Arachis ipaensis]		arahy.Tifrunner.gnm1.ann1.B97T9I.1	285	S	kinetochore protein spc25 isoform X1 [Arachis duranensis]		arahy.Tifrunner.gnm1.ann1.86BA7N.3	1303	S	NADP-specific glutamate dehydrogenase-like isoform X1 [Arachis ipaensis]		arahy.Tifrunner.gnm1.ann1.EJ82H8.1	probable WRKY transcription factor 33 [Arachis duranensis]
[truncated: 7,277 more rows]
